# Supplementary material for: Population genomics of an accidental pathogen Streptococcus mitis from patients with bloodstream infection and infective endocarditis in the UK and Ireland
Source: Research Square preprint supplement (doi:10.21203/rs.3.rs-3683629/v1), 2023-12-07
Supplement: Supplementary file 1 [file f918996b6dd14d31db31514a.xlsx]

## Sheet: Data 1
Sample name	Source	Season	CRF No	Age	Sex	ID	AMX	CTX	CIP	CLI	ERY	GEN	IPM	LIN	PEN	TZP	TEC	TET	VAN	ETP	MIN	TIG	BPR
59	British Society of Antimicrobial Chemotherapy	2005	AS1042	52	F	S. mitis	0.06	0.06	1	0.06	8	64	0.015	0.5	0.125	0.25	<=0.03	<=0.125	0.5	0.06	0.06	0.06	0.06
60	British Society of Antimicrobial Chemotherapy	2005	AS1051	75	M	S. mitis	0.25	0.03	2	0.03	0.03	4	0.03	<=0.25	0.25	0.25	0.125	<=0.125	1	0.06	0.125	<=0.03	0.03
61	British Society of Antimicrobial Chemotherapy	2005	AS1069	20	M	S. mitis	0.015	0.008	8	0.03	0.06	1	0.004	0.5	0.015	<=0.008	<=0.03	<=0.125	0.5	0.008	0.06	<=0.03	<=0.015
63	British Society of Antimicrobial Chemotherapy	2005	AS1079	55	F	S. mitis	0.5	0.125	16	0.06	4	4	0.015	0.5	0.25	0.5	<=0.03	0.25	0.5	0.06	0.06	0.06	0.125
65	British Society of Antimicrobial Chemotherapy	2005	AS1086	20	M	S. mitis	1	0.25	4	0.03	2	2	0.06	0.5	1	1	0.06	<=0.125	0.5	0.25	0.25	<=0.03	0.25
67	British Society of Antimicrobial Chemotherapy	2005	AS1111	79	F	S. mitis	0.015	0.03	2	0.06	0.125	1	0.004	1	0.015	0.015	<=0.03	0.25	0.5	0.015	0.06	0.06	<=0.015
69	British Society of Antimicrobial Chemotherapy	2005	AS1162	57	M	S. mitis	0.015	0.015	1	0.06	8	32	0.008	1	0.015	0.03	0.06	0.25	0.5	0.06	0.125	0.06	<=0.015
73	British Society of Antimicrobial Chemotherapy	2006	AS1318	31	F	S. mitis	0.03	0.06	4	0.06	4	0.5	0.015	1	0.06	0.03	0.06	0.5	0.5	0.03	0.06	0.06	0.06
74	British Society of Antimicrobial Chemotherapy	2006	AS1326	84	F	S. mitis	0.03	0.06	4	>128	>128	1	0.03	1	0.06	0.06	0.06	32	0.5	0.06	2	0.06	0.06
76	British Society of Antimicrobial Chemotherapy	2006	AS1397	48	F	S. mitis	0.03	0.03	4	0.06	16	2	0.008	1	0.03	0.03	<=0.03	64	0.5	0.015	16	0.06	0.03
77	British Society of Antimicrobial Chemotherapy	2006	AS1442	64	M	S. mitis	0.06	0.008	8	>128	>128	2	0.015	2	0.008	0.03	<=0.03	32	1	0.015	32	0.125	0.03
78	British Society of Antimicrobial Chemotherapy	2006	AS1461	2	F	S. mitis	0.015	0.03	2	0.125	0.125	1	0.015	1	0.06	0.03	<=0.03	0.5	0.5	0.03	0.06	0.06	0.03
79	British Society of Antimicrobial Chemotherapy	2006	AS1487	55	F	S. mitis	0.25	0.125	8	0.25	>128	4	0.03	1	0.25	0.5	<=0.03	1	0.5	0.03	0.125	0.06	0.25
82	British Society of Antimicrobial Chemotherapy	2007	AS1570	61	M	S. mitis	2	0.25	8	0.03	16	4	0.5	1	1	4	<=0.03	0.5	0.5	2	0.125	0.06	0.5
85	British Society of Antimicrobial Chemotherapy	2007	AS1693	71	M	S. mitis	0.125	0.125	4	0.06	8	32	0.03	1	0.125	0.25	0.125	0.5	1	0.125	1	0.125	0.125
88	British Society of Antimicrobial Chemotherapy	2007	AS1711	85	F	S. mitis	0.03	0.008	4	0.06	0.125	8	0.015	1	0.015	0.03	0.25	32	1	0.015	8	0.125	0.03
89	British Society of Antimicrobial Chemotherapy	2007	AS1731	49	M	S. mitis	2	0.5	8	0.06	8	64	0.25	1	1	4	0.125	0.5	1	1	0.5	0.06	0.25
9	British Society of Antimicrobial Chemotherapy	2001	AS175	38	F	S. mitis	<=0.015	<=0.015	16	0.06	8	2	<=0.015	1	<=0.03	<=0.03	<=0.12	0.5	0.5	NT	NT	NT	NT
91	British Society of Antimicrobial Chemotherapy	2008	AS1807	0	M	S. mitis	4	2	2	0.06	16	2	0.5	1	2	4	0.06	32	0.5	NT	8	0.06	0.5
93	British Society of Antimicrobial Chemotherapy	2008	AS1823	0	F	S. mitis	0.125	0.125	2	0.125	8	8	0.015	2	0.125	0.125	0.06	0.5	1	NT	0.25	0.03	0.125
95	British Society of Antimicrobial Chemotherapy	2008	AS1902	76	F	S. mitis	2	1	4	0.125	8	8	0.125	1	2	8	0.125	0.5	1	NT	0.125	0.06	1
96	British Society of Antimicrobial Chemotherapy	2008	AS1971	84	M	S. mitis	0.03	0.03	4	0.06	0.125	8	0.015	2	0.06	0.03	0.125	0.5	0.5	NT	0.25	0.06	0.015
10	British Society of Antimicrobial Chemotherapy	2001	AS201	4	F	S. mitis	0.06	0.06	4	0.06	4	16	0.03	1	0.06	0.06	<=0.12	0.5	0.5	NT	NT	NT	NT
97	British Society of Antimicrobial Chemotherapy	2009	AS2060	21	F	S. mitis	0.03	0.06	2	0.06	4	1	0.03	1	0.03	0.03	0.125	1	0.5	NT	0.06	0.06	0.06
99	British Society of Antimicrobial Chemotherapy	2009	AS2092	45	M	S. mitis	0.03	0.03	2	0.06	0.125	0.5	0.008	0.5	0.03	0.015	<=0.03	1	1	NT	0.06	0.06	0.03
100	British Society of Antimicrobial Chemotherapy	2009	AS2135	22	M	S. mitis	0.008	0.06	2	0.06	4	1	0.008	0.5	0.03	<=0.002	0.06	4	0.5	NT	1	0.06	0.008
102	British Society of Antimicrobial Chemotherapy	2009	AS2191	20	M	S. mitis	0.125	0.125	4	0.5	128	1	0.03	1	0.06	0.25	<=0.03	0.25	0.5	NT	0.06	0.03	0.06
105	British Society of Antimicrobial Chemotherapy	2010	AS2310	48	M	S. mitis	0.25	0.06	8	64	>128	8	0.015	1	0.125	0.25	<=0.03	32	0.5	NT	4	0.06	0.25
106	British Society of Antimicrobial Chemotherapy	2010	AS2314	2	F	S. mitis	4	4	4	0.06	16	8	0.5	1	4	4	0.125	0.25	0.5	NT	0.25	0.06	1
107	British Society of Antimicrobial Chemotherapy	2010	AS2335	34	M	S. mitis	0.03	0.06	4	0.06	0.125	2	0.015	1	0.03	0.06	0.125	0.25	0.5	NT	0.06	0.03	0.06
12	British Society of Antimicrobial Chemotherapy	2001	AS239	55	F	S. mitis	0.03	0.06	8	0.12	0.25	8	<=0.015	1	<=0.03	<=0.03	<=0.12	0.25	0.5	NT	NT	NT	NT
13	British Society of Antimicrobial Chemotherapy	2001	AS241	73	M	S. mitis	<=0.015	<=0.015	4	0.12	4	2	<=0.015	1	<=0.03	<=0.03	<=0.12	0.5	1	NT	NT	NT	NT
14	British Society of Antimicrobial Chemotherapy	2001	AS245	17	M	S. mitis	0.25	0.25	4	0.12	4	4	0.03	1	0.12	0.25	0.25	0.5	0.5	NT	NT	NT	NT
110	British Society of Antimicrobial Chemotherapy	2010	AS2473	56	M	S. mitis	0.015	0.03	8	0.125	8	8	0.008	2	0.03	0.008	0.06	0.5	0.5	NT	0.5	0.06	0.015
111	British Society of Antimicrobial Chemotherapy	2010	AS2484	2	M	S. mitis	0.015	0.03	8	0.125	8	4	0.008	2	0.03	0.008	0.06	0.5	0.5	NT	0.5	0.06	0.015
112	British Society of Antimicrobial Chemotherapy	2010	AS2490	53	F	S. mitis	0.015	0.015	16	0.06	0.25	2	0.008	1	0.015	0.015	0.06	0.25	0.5	NT	0.25	0.06	0.015
113	British Society of Antimicrobial Chemotherapy	2010	AS2492	57	M	S. mitis	0.008	0.015	16	0.125	16	4	0.008	2	0.03	0.008	0.06	0.5	0.5	NT	2	0.06	0.008
114	British Society of Antimicrobial Chemotherapy	2010	AS2501	54	F	S. mitis	0.06	0.06	8	0.25	0.125	32	0.015	1	0.125	0.06	0.06	0.25	0.5	NT	0.25	0.125	0.25
116	British Society of Antimicrobial Chemotherapy	2011	AS2537	57	M	S. mitis	0.015	0.015	4	0.06	0.06	16	0.015	1	0.015	0.015	0.125	64	1	NT	16	0.06	NT
117	British Society of Antimicrobial Chemotherapy	2011	AS2538	46	M	S. mitis	0.03	0.03	32	0.03	8	1	0.008	1	0.03	0.015	0.06	0.5	0.5	NT	0.5	0.06	NT
119	British Society of Antimicrobial Chemotherapy	2011	AS2554	51	M	S. mitis	1	0.125	4	>128	>128	4	0.25	0.5	0.5	1	0.06	64	1	NT	4	0.03	NT
121	British Society of Antimicrobial Chemotherapy	2011	AS2569	67	F	S. mitis	0.015	0.008	8	128	>128	2	0.008	1	0.008	0.008	<=0.03	32	0.5	NT	4	0.06	NT
122	British Society of Antimicrobial Chemotherapy	2011	AS2573	84	M	S. mitis	0.03	0.015	8	0.06	4	8	0.015	1	0.03	0.015	0.06	0.25	0.5	NT	0.125	0.06	NT
124	British Society of Antimicrobial Chemotherapy	2011	AS2588	34	M	S. mitis	8	4	2	0.06	32	1	1	1	8	8	0.06	0.5	0.5	NT	0.25	0.06	NT
15	British Society of Antimicrobial Chemotherapy	2002	AS263	79	F	S. mitis	0.03	0.03	8	>128	>128	32	0.008	0.5	0.06	0.06	0.06	64	0.5	<=0.015	8	0.5	NT
125	British Society of Antimicrobial Chemotherapy	2011	AS2641	61	M	S. mitis	0.015	0.06	8	0.06	4	8	0.015	1	0.03	0.015	0.06	0.5	0.5	NT	0.5	0.06	NT
126	British Society of Antimicrobial Chemotherapy	2011	AS2690	44	M	S. mitis	0.015	0.008	2	0.06	0.125	2	0.015	1	0.015	0.008	0.06	0.5	0.5	NT	0.125	0.06	NT
128	British Society of Antimicrobial Chemotherapy	2011	AS2775	28	F	S. mitis	0.03	0.015	8	0.06	0.125	4	0.008	1	0.015	0.015	0.06	64	0.5	NT	8	0.06	NT
129	British Society of Antimicrobial Chemotherapy	2011	AS2786	54	F	S. mitis	0.06	0.125	4	0.125	4	4	0.03	1	0.125	0.125	0.125	32	0.5	NT	8	0.06	NT
132	British Society of Antimicrobial Chemotherapy	2012	AS2990	4	F	S. mitis	0.06	0.03	4	0.06	8	4	0.015	1	0.06	0.125	0.06	0.5	1	NT	0.125	0.06	0.015
133-2	British Society of Antimicrobial Chemotherapy	2012	AS3066	65	F	S. mitis	0.125	0.125	4	0.125	16	2	0.015	0.5	0.125	0.125	0.06	64	1	NT	16	0.125	0.06
134	British Society of Antimicrobial Chemotherapy	2012	AS3088	23	M	S. mitis	0.125	0.25	8	0.125	4	4	0.06	1	0.25	0.25	0.125	8	1	NT	1	0.06	0.125
137	British Society of Antimicrobial Chemotherapy	2013	AS3181	0	F	S. mitis	0.06	0.125	8	0.125	0.125	2	0.008	1	0.06	0.015	0.125	0.5	0.5	NT	0.5	0.06	0.03
139	British Society of Antimicrobial Chemotherapy	2013	AS3287	55	M	S. mitis	0.5	0.125	4	0.125	16	1	0.06	1	0.5	1	<=0.015	0.25	0.5	NT	0.06	0.03	0.125
1	British Society of Antimicrobial Chemotherapy	2001	AS33	41	F	S. mitis	0.03	0.03	2	0.25	16	16	<=0.015	2	<=0.03	<=0.03	<=0.12	1	0.5	NT	NT	NT	NT
140	British Society of Antimicrobial Chemotherapy	2013	AS3324	39	F	S. mitis	0.015	0.015	4	0.06	0.06	0.5	0.008	1	0.015	0.015	0.06	0.25	0.5	NT	0.06	0.03	0.015
19	British Society of Antimicrobial Chemotherapy	2002	AS337	53	F	S. mitis	0.015	0.015	8	<=0.015	0.03	0.5	<=0.004	0.5	0.015	0.125	<=0.03	0.25	0.5	0.03	0.06	0.06	NT
20	British Society of Antimicrobial Chemotherapy	2002	AS385	36	F	S. mitis	0.125	0.06	2	0.06	4	1	0.03	1	0.06	0.25	0.06	0.25	0.5	0.06	0.125	0.125	NT
21	British Society of Antimicrobial Chemotherapy	2002	AS393	87	F	S. mitis	0.03	0.06	4	0.5	>128	16	0.015	1	0.03	0.03	0.06	64	0.5	0.03	16	0.125	NT
22	British Society of Antimicrobial Chemotherapy	2002	AS428	74	M	S. mitis	0.03	0.125	8	0.06	0.125	32	0.015	1	0.03	0.125	0.125	0.25	0.5	0.06	0.125	0.125	NT
26	British Society of Antimicrobial Chemotherapy	2002	AS498	20	M	S. mitis	0.03	0.06	8	0.125	0.125	4	0.015	1	0.06	0.06	0.06	0.25	0.5	0.03	0.125	0.125	NT
30	British Society of Antimicrobial Chemotherapy	2003	AS559	78	M	S. mitis	0.12	0.12	4	0.25	4	16	0.015	1	0.12	0.12	<=0.03	0.5	0.12	0.06	0.25	0.25	NT
31	British Society of Antimicrobial Chemotherapy	2003	AS567	12	F	S. mitis	0.12	0.25	4	0.12	0.12	16	0.03	2	0.25	0.25	<=0.03	0.5	0.12	0.06	0.25	0.12	NT
33	British Society of Antimicrobial Chemotherapy	2003	AS577	62	M	S. mitis	0.03	0.12	4	0.12	0.12	4	0.008	1	0.03	0.03	<=0.03	0.5	0.12	0.03	0.25	0.25	NT
34	British Society of Antimicrobial Chemotherapy	2003	AS578	58	M	S. mitis	0.12	0.03	8	0.12	0.25	32	0.03	2	0.06	0.25	<=0.03	64	0.12	0.12	8	0.25	NT
37	British Society of Antimicrobial Chemotherapy	2003	AS624	20	F	S. mitis	0.03	0.06	4	0.12	0.12	8	0.008	1	0.03	0.06	<=0.03	0.5	0.12	0.03	0.25	0.06	NT
3	British Society of Antimicrobial Chemotherapy	2001	AS64	39	M	S. mitis	0.06	0.03	32	0.06	4	16	<=0.015	2	<=0.03	<=0.03	<=0.12	0.5	0.5	NT	NT	NT	NT
38	British Society of Antimicrobial Chemotherapy	2003	AS645	73	F	S. mitis	0.03	0.03	1	128	>128	8	<=0.004	0.5	0.015	0.015	<=0.03	32	0.5	0.03	4	0.06	NT
4	British Society of Antimicrobial Chemotherapy	2001	AS65	50	F	S. mitis	<=0.015	0.03	8	0.03	0.12	16	<=0.015	0.5	<=0.03	<=0.03	<=0.12	64	0.5	NT	NT	NT	NT
5	British Society of Antimicrobial Chemotherapy	2001	AS76	58	M	S. mitis	<=0.015	<=0.015	2	0.12	0.12	2	<=0.015	1	<=0.03	<=0.03	<=0.12	0.5	0.5	NT	NT	NT	NT
42	British Society of Antimicrobial Chemotherapy	2004	AS787	54	F	S. mitis	0.125	0.125	4	128	>128	32	0.06	1	0.125	0.25	0.06	64	1	0.125	16	0.125	<=0.06
43	British Society of Antimicrobial Chemotherapy	2004	AS801	0	M	S. mitis	0.03	0.06	8	0.125	1	8	0.008	1	0.03	<=0.008	0.06	0.25	0.5	0.03	0.125	0.06	<=0.06
44	British Society of Antimicrobial Chemotherapy	2004	AS813	93	F	S. mitis	0.125	0.125	16	0.03	4	8	0.03	1	0.125	0.125	0.06	64	0.5	0.06	16	0.06	0.125
45	British Society of Antimicrobial Chemotherapy	2004	AS816	35	M	S. mitis	0.008	<=0.004	32	0.06	0.125	2	0.008	1	<=0.008	<=0.008	<=0.03	0.5	0.5	<=0.015	0.125	0.125	<=0.06
46	British Society of Antimicrobial Chemotherapy	2004	AS823	94	F	S. mitis	0.03	0.06	8	0.125	64	1	0.008	1	0.03	<=0.008	0.06	0.25	0.5	0.03	0.06	0.06	<=0.06
47	British Society of Antimicrobial Chemotherapy	2004	AS825	1	F	S. mitis	4	2	16	0.125	128	4	1	0.5	4	4	0.06	0.25	0.5	1	0.06	<=0.03	1
49	British Society of Antimicrobial Chemotherapy	2004	AS842	12	F	S. mitis	4	2	2	0.06	64	2	0.5	1	4	4	0.06	0.25	1	1	0.06	<=0.03	2
50	British Society of Antimicrobial Chemotherapy	2004	AS843	10	F	S. mitis	0.015	0.06	8	0.06	1	4	0.008	1	0.03	0.015	0.06	0.25	0.5	0.03	0.06	<=0.03	<=0.06
52	British Society of Antimicrobial Chemotherapy	2004	AS871	80	M	S. mitis	0.015	0.015	2	0.06	4	2	0.015	2	0.015	0.03	0.06	0.5	0.5	<=0.015	0.25	0.06	<=0.06
54	British Society of Antimicrobial Chemotherapy	2004	AS934	0	M	S. mitis	0.015	0.06	8	0.06	0.5	2	0.008	1	0.015	<=0.008	0.06	0.25	0.5	0.03	0.06	<=0.03	<=0.06
55	British Society of Antimicrobial Chemotherapy	2004	AS939	72	F	S. mitis	0.015	0.015	2	0.125	32	4	0.008	1	0.015	<=0.008	<=0.03	64	0.5	<=0.015	32	0.25	<=0.06
56	British Society of Antimicrobial Chemotherapy	2004	AS948	48	F	S. mitis	0.03	0.06	16	0.06	1	2	0.03	1	0.06	0.06	0.06	0.5	0.5	0.03	0.125	0.125	<=0.06
57	British Society of Antimicrobial Chemotherapy	2004	AS962	49	M	S. mitis	0.015	0.008	32	0.125	16	2	0.008	1	<=0.008	<=0.008	0.125	0.5	0.5	<=0.015	0.25	0.25	<=0.06
146	British Society of Antimicrobial Chemotherapy	2014	ASB14037	81	M	S. mitis	0.03	0.015	4	0.06	8	2	NT	NT	0.03	NT	0.06	0.25	0.5	NT	NT	NT	0.015
147	British Society of Antimicrobial Chemotherapy	2014	ASB14040	67	F	S. mitis	0.015	0.008	8	0.06	0.125	1	NT	NT	0.015	NT	<=0.03	0.25	0.5	NT	NT	NT	0.015
148	British Society of Antimicrobial Chemotherapy	2014	ASB14055	73	M	S. mitis	0.06	0.06	2	0.06	2	0.5	NT	NT	0.06	NT	<=0.03	32	0.5	NT	NT	NT	0.03
151	British Society of Antimicrobial Chemotherapy	2014	ASB14154	5	F	S. mitis	0.125	0.125	4	0.125	0.06	2	NT	NT	0.25	NT	0.06	0.25	0.5	NT	NT	NT	0.125
153	British Society of Antimicrobial Chemotherapy	2014	ASB14169	78	M	S. mitis	0.03	0.03	4	0.125	8	32	NT	NT	0.03	NT	0.125	0.5	0.5	NT	NT	NT	0.015
155	British Society of Antimicrobial Chemotherapy	2014	ASB14222	31	F	S. mitis	0.03	0.015	4	0.06	4	0.5	NT	NT	0.015	NT	<=0.03	0.25	0.5	NT	NT	NT	0.015
156	British Society of Antimicrobial Chemotherapy	2015	ASB15018	68	F	S. mitis	1	0.5	4	0.06	4	1	NT	NT	1	NT	0.06	64	0.5	NT	NT	NT	0.5
157	British Society of Antimicrobial Chemotherapy	2015	ASB15033	47	F	S. mitis	0.03	0.06	4	128	>128	4	NT	NT	0.06	NT	0.06	0.25	0.5	NT	NT	NT	0.03
158	British Society of Antimicrobial Chemotherapy	2015	ASB15039	60	F	S. mitis	2	0.25	1	0.06	16	16	NT	NT	1	NT	0.06	0.25	0.25	NT	NT	NT	0.25
159	British Society of Antimicrobial Chemotherapy	2015	ASB15043	33	F	S. mitis	4	1	0.5	0.03	4	16	NT	NT	2	NT	<=0.03	128	0.5	NT	NT	NT	0.5
161	British Society of Antimicrobial Chemotherapy	2015	ASB15116	85	M	S. mitis	0.125	0.125	4	0.06	1	4	NT	NT	0.125	NT	0.06	0.25	0.5	NT	NT	NT	0.125
162	British Society of Antimicrobial Chemotherapy	2015	ASB15147	16	M	S. mitis	0.5	0.25	8	0.06	2	2	NT	NT	0.25	NT	0.06	0.5	1	NT	NT	NT	0.125
163	British Society of Antimicrobial Chemotherapy	2015	ASB15196	59	M	S. mitis	0.03	0.015	4	0.06	0.06	2	NT	NT	0.015	NT	<=0.03	0.5	1	NT	NT	NT	0.015
165	British Society of Antimicrobial Chemotherapy	2015	ASB15222	47	M	S. mitis	0.25	0.125	4	0.125	32	4	NT	NT	0.125	NT	0.06	0.25	1	NT	NT	NT	0.125
166	British Society of Antimicrobial Chemotherapy	2016	ASB16003	0	M	S. mitis	NT	0.06	NT	0.06	0.06	1	NT	NT	0.125	NT	<=0.03	0.25	0.5	NT	NT	NT	0.03
167	British Society of Antimicrobial Chemotherapy	2016	ASB16010	38	F	S. mitis	NT	0.5	NT	0.125	>128	1	NT	NT	0.5	NT	0.06	16	0.5	NT	NT	NT	0.25
168	British Society of Antimicrobial Chemotherapy	2016	ASB16013	66	M	S. mitis	NT	0.015	NT	0.06	0.06	1	NT	NT	0.03	NT	0.06	0.25	0.5	NT	NT	NT	0.03
169	British Society of Antimicrobial Chemotherapy	2016	ASB16022	3	F	S. mitis	NT	0.25	NT	0.06	0.06	2	NT	NT	1	NT	<=0.03	0.25	0.5	NT	NT	NT	0.25
170	British Society of Antimicrobial Chemotherapy	2016	ASB16027	63	F	S. mitis	NT	0.03	NT	0.06	8	1	NT	NT	0.03	NT	0.06	0.25	1	NT	NT	NT	0.03
172	British Society of Antimicrobial Chemotherapy	2016	ASB16086	0	M	S. mitis	NT	0.125	NT	0.06	4	2	NT	NT	0.125	NT	0.06	0.25	0.5	NT	NT	NT	0.06
173	British Society of Antimicrobial Chemotherapy	2016	ASB16101	66	F	S. mitis	NT	0.25	NT	0.06	0.06	1	NT	NT	0.25	NT	0.06	32	0.5	NT	NT	NT	0.25
174	British Society of Antimicrobial Chemotherapy	2016	ASB16134	52	M	S. mitis	NT	0.125	NT	0.03	4	1	NT	NT	0.06	NT	<=0.03	64	0.5	NT	NT	NT	0.06
176	British Society of Antimicrobial Chemotherapy	2016	ASB16172	40	F	S. mitis	NT	0.125	NT	0.125	0.06	4	NT	NT	0.125	NT	0.06	0.25	0.5	NT	NT	NT	0.125

## Sheet: Data 2
Identifier	Source	Year	Age	Sex	CTX	CIP	CLI	ERY	GEN	LIN	PEN	TEC	TET	VAN
1	UK Health Security Agency	2003	70-79	M	<=0.06	4	<=0.25	<=0.25	4	1	0.016	<=0.5	1	1
3	UK Health Security Agency	2003	50-59	M	0.064	16	>256	>256	16	1	0.064	0.125	>256	2
7	UK Health Security Agency	2004	60-69	U	0.25	2	0.5	0.125	16	1	0.125	0.5	2	2
11	UK Health Security Agency	2004	50-59	M	<=0.06		<=0.25	0.5	8	1	0.064	<=0.5	1	1
12	UK Health Security Agency	2004	80-89	M							0.006
13	UK Health Security Agency	2004	40-49	M							0.75
14	UK Health Security Agency	2004	80-89	F							0.047
21	UK Health Security Agency	2005	50-59	F	<=0.06		<=0.25	<=0.25	8	1	0.38	<=0.5	<=0.5	<=0.5
22	UK Health Security Agency	2005	40-49	M							0.064
27	UK Health Security Agency	2006	70-79	M							0.047
28	UK Health Security Agency	2006	30-39	F	<=0.06		<=0.25	<=0.25	4	1	0.012	<=0.5	>8	1
32	UK Health Security Agency	2006	30-39	M							0.032
38	UK Health Security Agency	2007	60-69	M							0.064
42	UK Health Security Agency	2009	40-49	M	4	2	<=0.25	1	4	1	3	<=0.5	1	1
44	UK Health Security Agency	2010	50-59	F	<=0.06		<=0.25	>16	32		0.047	<=0.5	<=0.5	<=0.5
50	UK Health Security Agency	2011	80-89	M	<=0.06		<=0.25	8	2		0.023	<=0.5	>8	<=0.5
52	UK Health Security Agency	2012	20-29	M	0.25		0.5	4	2		0.38	<=0.5	>8	<=0.5
55	UK Health Security Agency	2013	70-79	M							0.023
59	UK Health Security Agency	2014	50-59	M	<=0.06			<=0.25	4	<=0.5	0.023	>8	0.06	<=0.5
60	UK Health Security Agency	2015	20-29	M							0.023
61	UK Health Security Agency	2015	50-59	M	0.25		<=0.25	<=0.25	<=1		0.5	<=0.5		1
62	UK Health Security Agency	2015	30-39	M							0.032
164	UK Health Security Agency	2006	70-79	M							3

## Sheet: Data 3
Year	snp-dists 0.7.0	B1_S23	B10_S32	B12_S34	B13_S35	B14_S36	B3_S25	B4_S26	B5_S27	B9_S31	B15_S37	B19_S40	B20_S41	B21_S42	B22_S43	B26_S45	1P_S1	3P_S2	B30_S48	B31_S49	B33_S51	B34_S52	B37_S55	B38_S56	12P_S5	13P_S6	14P_S7	7P_S3	B42_S60	B43_S61	B44_S62	B45_S63	B46_S64	B47_S65	B49_S67	B50_S68	B52_S70	B54_S72	B55_S73	B56_S74	B57_S75	P11_S4	22P_S11	B59_S77	B60_S78	B61_S79	B63_S81	B65_S83	B67_S85
2001	B1_S23	0	51655	50375	50379	49928	50023	50395	51200	45891	50814	46698	47420	50208	52037	52434	51882	46903	50716	50831	50990	47959	46177	47518	50122	50400	46429	50490	50510	52893	50184	50468	50733	51879	51470	50718	51228	50572	51031	49976	50838	51362	50309	46645	50510	50253	47185	48033	45894
2001	B10_S32	51655	0	47044	46890	49347	48209	47399	48697	51325	49256	51537	51098	48186	44859	47864	49484	51949	48709	49736	48862	52323	51103	51853	46776	47633	50794	48817	49329	50449	48623	47261	46898	50937	50441	50209	49704	49671	48044	47071	46902	47537	47737	50965	46497	48985	52115	52140	51300
2001	B12_S34	50375	47044	0	39351	46875	44262	42249	45075	49790	46336	50338	48821	45407	47679	49021	46405	50548	45359	47195	45752	51338	50233	50560	39512	43813	49920	45438	45201	46071	44741	43472	42253	48431	48348	47819	47592	46549	46816	43387	39222	43651	43743	49850	39742	47168	50759	51019	49351
2001	B13_S35	50379	46890	39351	0	45630	43060	41913	44508	49541	44900	50145	48340	44130	47743	49195	46036	50287	44762	46292	43254	50815	49749	50325	36860	42350	49373	43934	44701	44022	44029	42295	41170	48018	47585	46877	46967	45989	46276	42481	36135	41926	43402	49101	38094	46336	50255	50555	48871
2001	B14_S36	49928	49347	46875	45630	0	47480	46826	48077	49638	44411	49956	49819	43591	50185	50239	49053	50351	43780	44156	45644	50664	49820	50623	45571	47658	49684	42853	38278	49009	43408	47007	46281	49022	48775	46007	48370	43652	48870	45897	46395	46827	44198	49316	45681	48079	49925	50689	49618
2001	B3_S25	50023	48209	44262	43060	47480	0	44795	45995	49417	47579	49700	49379	46730	48570	49471	46763	50535	47413	47102	47350	50798	49473	50482	42962	41694	48755	46654	46674	47727	46652	44538	45277	48219	47868	48291	48021	47360	47027	44898	44696	45733	46051	48981	42824	41837	49728	50572	49033
2001	B4_S26	50395	47399	42249	41913	46826	44795	0	45773	49931	47092	50052	49291	46385	47718	49206	46716	50508	46644	47683	46304	50850	49774	50974	41107	43988	49430	46131	45826	47097	45844	44010	43939	48550	48460	47954	48216	47359	47494	44742	42384	45183	45749	49858	42288	45969	50338	51050	49333
2001	B5_S27	51200	48697	45075	44508	48077	45995	45773	0	50179	47932	50955	50117	47341	49067	49948	25150	50987	48007	48989	47686	51895	50425	51437	44537	46297	50167	47321	47848	48901	47104	46121	46012	48941	48513	49101	48381	47505	47932	45784	45566	46813	46980	50382	44564	47537	51037	51645	50390
2001	B9_S31	45891	51325	49790	49541	49638	49417	49931	50179	0	49745	45125	45479	49416	51288	51655	50824	45856	49934	50192	50265	45423	41714	45446	49309	49701	44868	49525	49657	51929	49934	49872	49893	51141	50620	50462	50884	49264	50512	49103	49797	50500	50030	44091	49694	49593	45585	46774	44233
2002	B15_S37	50814	49256	46336	44900	44411	47579	47092	47932	49745	0	50341	49803	44133	49984	49571	48779	51245	43200	44643	45246	51510	50191	50948	45485	47125	50416	42646	44198	48809	44313	46759	45774	48525	48324	44834	48030	43847	49082	45533	45332	46873	44920	50218	44935	48368	50649	50836	50049
2002	B19_S40	46698	51537	50338	50145	49956	49700	50052	50955	45125	50341	0	46513	50305	51835	52071	51462	47166	50588	50716	50894	47785	45779	45321	49970	50369	46127	50237	50326	52519	50266	50103	50412	51540	51111	50688	51555	50076	50906	49628	50214	50662	50525	46565	50259	50060	27945	45255	45988
2002	B20_S41	47420	51098	48821	48340	49819	49379	49291	50117	45479	49803	46513	0	49357	51314	51760	50892	40274	49561	50069	50213	47776	45562	47388	48667	49412	41747	49728	49511	51903	49367	49284	49540	51261	50913	50903	50694	49787	50832	48996	48911	50061	49431	41607	48639	50022	47471	48050	45991
2002	B21_S42	50208	48186	45407	44130	43591	46730	46385	47341	49416	44133	50305	49357	0	49111	49443	48118	50714	42211	44129	42148	51156	50180	50315	44074	46595	49773	41954	43498	47816	44158	46470	43631	48768	48741	44542	47716	43871	47932	44628	44481	45682	21371	49802	44156	47224	50555	50665	49656
2002	B22_S43	52037	44859	47679	47743	50185	48570	47718	49067	51288	49984	51835	51314	49111	0	46701	49941	52469	49228	50042	50081	52719	51017	52076	47422	48327	51283	49615	49395	51191	49426	47759	47491	51025	50367	51170	49962	49927	48306	48678	47397	49486	48269	51060	47398	49710	52452	52286	51220
2002	B26_S45	52434	47864	49021	49195	50239	49471	49206	49948	51655	49571	52071	51760	49443	46701	0	50305	52207	49949	50729	50667	53020	51721	52309	48323	49540	51416	49512	49786	51961	49742	48675	49123	51341	50830	51142	50477	49675	48969	49132	49542	50460	49492	51406	48918	49178	52061	52556	51344
2003	1P_S1	51882	49484	46405	46036	49053	46763	46716	25150	50824	48779	51462	50892	48118	49941	50305	0	51697	48998	49614	48265	52135	51063	52137	45333	47354	50836	48407	49291	49925	48377	47372	47459	49812	49067	49883	49245	48625	48311	46229	46708	48008	47714	51133	46403	47525	51547	51939	50619
2003	3P_S2	46903	51949	50548	50287	50351	50535	50508	50987	45856	51245	47166	40274	50714	52469	52207	51697	0	51317	51050	50976	47770	44985	47682	50098	50184	33563	50632	50357	52792	50468	50533	50791	52094	51413	51015	51745	50570	51316	49920	50421	51470	50713	35213	50475	50624	47534	47934	46297
2003	B30_S48	50716	48709	45359	44762	43780	47413	46644	48007	49934	43200	50588	49561	42211	49228	49949	48998	51317	0	44143	39112	51881	50146	50848	44404	47143	50065	41680	42813	48623	43514	46061	45191	48829	48796	45618	48411	43895	48885	45344	44732	45615	43389	49978	44887	47926	50694	50880	50157
2003	B31_S49	50831	49736	47195	46292	44156	47102	47683	48989	50192	44643	50716	50069	44129	50042	50729	49614	51050	44143	0	45039	51239	50318	50995	46772	47451	50256	43485	43915	49597	43899	47657	46544	49042	48864	44524	48615	44725	48987	46215	47266	47814	44898	50258	46177	48260	51043	51159	49983
2003	B33_S51	50990	48862	45752	43254	45644	47350	46304	47686	50265	45246	50894	50213	42148	50081	50667	48265	50976	39112	45039	0	51438	50735	51169	44185	47197	50292	42844	43675	47948	43277	46224	44862	49236	48968	45673	48200	44645	48797	45689	44418	45643	43719	50241	44406	47607	51319	51451	50121
2003	B34_S52	47959	52323	51338	50815	50664	50798	50850	51895	45423	51510	47785	47776	51156	52719	53020	52135	47770	51881	51239	51438	0	45598	47944	50600	50812	47711	51225	50820	53395	50643	51235	51473	52238	51782	51556	52079	51029	51628	50505	51162	51590	51222	47613	50675	51123	48390	48342	46165
2003	B37_S55	46177	51103	50233	49749	49820	49473	49774	50425	41714	50191	45779	45562	50180	51017	51721	51063	44985	50146	50318	50735	45598	0	46742	49473	49542	44338	50182	49668	52064	50127	49864	50115	51474	50937	50687	51140	49719	50721	49153	49957	50417	49924	45829	49611	49848	46989	47542	43720
2003	B38_S56	47518	51853	50560	50325	50623	50482	50974	51437	45446	50948	45321	47388	50315	52076	52309	52137	47682	50848	50995	51169	47944	46742	0	50254	50426	47026	50870	50620	52801	50522	50732	51194	51950	51502	51433	51590	50600	51367	49929	50754	51302	50502	47010	50404	50613	46137	44985	46674
2004	12P_S5	50122	46776	39512	36860	45571	42962	41107	44537	49309	45485	49970	48667	44074	47422	48323	45333	50098	44404	46772	44185	50600	49473	50254	0	42037	48986	44034	43934	43095	43894	42008	41109	47907	46767	46806	46756	45507	45477	43026	38634	42100	42538	48876	36200	45703	50094	50860	48668
2004	13P_S6	50400	47633	43813	42350	47658	41694	43988	46297	49701	47125	50369	49412	46595	48327	49540	47354	50184	47143	47451	47197	50812	49542	50426	42037	0	49530	46597	46681	47596	46016	43790	44634	49097	48745	48447	47839	47693	47554	44549	43722	46157	45929	49285	42712	46293	50771	50656	49310
2004	14P_S7	46429	50794	49920	49373	49684	48755	49430	50167	44868	50416	46127	41747	49773	51283	51416	50836	33563	50065	50256	50292	47711	44338	47026	48986	49530	0	49957	49808	51634	49916	49307	49861	51466	51040	50653	50810	49563	49820	48910	49387	50070	49815	36639	48728	50031	46394	47650	45805
2004	7P_S3	50490	48817	45438	43934	42853	46654	46131	47321	49525	42646	50237	49728	41954	49615	49512	48407	50632	41680	43485	42844	51225	50182	50870	44034	46597	49957	0	41808	47836	39573	45943	44770	48578	48396	44252	47712	43618	48894	44587	45112	46464	43040	49638	44089	47829	50376	50792	49676
2004	B42_S60	50510	49329	45201	44701	38278	46674	45826	47848	49657	44198	50326	49511	43498	49395	49786	49291	50357	42813	43915	43675	50820	49668	50620	43934	46681	49808	41808	0	48253	42078	46043	44766	48525	48609	45315	47969	43623	48779	45243	45392	46783	43979	49761	44583	47987	50382	50778	49495
2004	B43_S61	52893	50449	46071	44022	49009	47727	47097	48901	51929	48809	52519	51903	47816	51191	51961	49925	52792	48623	49597	47948	53395	52064	52801	43095	47596	51634	47836	48253	0	47569	47172	46075	50379	50299	50220	49726	48775	50204	46537	45339	40054	47810	51825	43593	49732	52659	52817	51710
2004	B44_S62	50184	48623	44741	44029	43408	46652	45844	47104	49934	44313	50266	49367	44158	49426	49742	48377	50468	43514	43899	43277	50643	50127	50522	43894	46016	49916	39573	42078	47569	0	46276	45202	48280	48030	45507	47495	44330	48616	44134	45146	46137	44274	49588	43669	47827	50190	51037	49052
2004	B45_S63	50468	47261	43472	42295	47007	44538	44010	46121	49872	46759	50103	49284	46470	47759	48675	47372	50533	46061	47657	46224	51235	49864	50732	42008	43790	49307	45943	46043	47172	46276	0	43240	48394	48321	48105	47580	46667	47478	44479	43274	45366	45017	49491	42554	45404	50523	50698	49324
2004	B46_S64	50733	46898	42253	41170	46281	45277	43939	46012	49893	45774	50412	49540	43631	47491	49123	47459	50791	45191	46544	44862	51473	50115	51194	41109	44634	49861	44770	44766	46075	45202	43240	0	48501	48190	47495	47669	45998	47085	43309	41983	44902	43346	49815	41932	47325	50928	51366	49843
2004	B47_S65	51879	50937	48431	48018	49022	48219	48550	48941	51141	48525	51540	51261	48768	51025	51341	49812	52094	48829	49042	49236	52238	51474	51950	47907	49097	51466	48578	48525	50379	48280	48394	48501	0	26398	49637	49514	48174	50348	46942	48228	48766	48727	50921	47289	49035	51358	51833	51024
2004	B49_S67	51470	50441	48348	47585	48775	47868	48460	48513	50620	48324	51111	50913	48741	50367	50830	49067	51413	48796	48864	48968	51782	50937	51502	46767	48745	51040	48396	48609	50299	48030	48321	48190	26398	0	49262	48651	48050	49885	46444	47823	48476	48608	50580	46862	48557	51033	51600	50489
2004	B50_S68	50718	50209	47819	46877	46007	48291	47954	49101	50462	44834	50688	50903	44542	51170	51142	49883	51015	45618	44524	45673	51556	50687	51433	46806	48447	50653	44252	45315	50220	45507	48105	47495	49637	49262	0	48846	45648	49750	46308	47533	48506	44598	50423	46524	49159	51166	51451	50265
2004	B52_S70	51228	49704	47592	46967	48370	48021	48216	48381	50884	48030	51555	50694	47716	49962	50477	49245	51745	48411	48615	48200	52079	51140	51590	46756	47839	50810	47712	47969	49726	47495	47580	47669	49514	48651	48846	0	48103	49798	46384	47547	47918	47686	51092	46765	48575	51766	51536	50738
2004	B54_S72	50572	49671	46549	45989	43652	47360	47359	47505	49264	43847	50076	49787	43871	49927	49675	48625	50570	43895	44725	44645	51029	49719	50600	45507	47693	49563	43618	43623	48775	44330	46667	45998	48174	48050	45648	48103	0	49056	45070	46221	47244	44256	49588	45816	47255	50221	50954	49396
2004	B55_S73	51031	48044	46816	46276	48870	47027	47494	47932	50512	49082	50906	50832	47932	48306	48969	48311	51316	48885	48987	48797	51628	50721	51367	45477	47554	49820	48894	48779	50204	48616	47478	47085	50348	49885	49750	49798	49056	0	47108	46777	47897	47524	50254	46512	48338	51166	51762	50131
2004	B56_S74	49976	47071	43387	42481	45897	44898	44742	45784	49103	45533	49628	48996	44628	48678	49132	46229	49920	45344	46215	45689	50505	49153	49929	43026	44549	48910	44587	45243	46537	44134	44479	43309	46942	46444	46308	46384	45070	47108	0	43950	44141	44113	49234	42626	45855	49743	50436	48856
2004	B57_S75	50838	46902	39222	36135	46395	44696	42384	45566	49797	45332	50214	48911	44481	47397	49542	46708	50421	44732	47266	44418	51162	49957	50754	38634	43722	49387	45112	45392	45339	45146	43274	41983	48228	47823	47533	47547	46221	46777	43950	0	43409	43352	49244	38960	46659	50590	51089	49388
2004	P11_S4	51362	47537	43651	41926	46827	45733	45183	46813	50500	46873	50662	50061	45682	49486	50460	48008	51470	45615	47814	45643	51590	50417	51302	42100	46157	50070	46464	46783	40054	46137	45366	44902	48766	48476	48506	47918	47244	47897	44141	43409	0	45356	50278	42155	47065	50957	51253	49842
2005	22P_S11	50309	47737	43743	43402	44198	46051	45749	46980	50030	44920	50525	49431	21371	48269	49492	47714	50713	43389	44898	43719	51222	49924	50502	42538	45929	49815	43040	43979	47810	44274	45017	43346	48727	48608	44598	47686	44256	47524	44113	43352	45356	0	49819	43258	47382	50741	50921	49539
2005	B59_S77	46645	50965	49850	49101	49316	48981	49858	50382	44091	50218	46565	41607	49802	51060	51406	51133	35213	49978	50258	50241	47613	45829	47010	48876	49285	36639	49638	49761	51825	49588	49491	49815	50921	50580	50423	51092	49588	50254	49234	49244	50278	49819	0	49071	49691	46703	47090	45794
2005	B60_S78	50510	46497	39742	38094	45681	42824	42288	44564	49694	44935	50259	48639	44156	47398	48918	46403	50475	44887	46177	44406	50675	49611	50404	36200	42712	48728	44089	44583	43593	43669	42554	41932	47289	46862	46524	46765	45816	46512	42626	38960	42155	43258	49071	0	45612	50258	50595	49330
2005	B61_S79	50253	48985	47168	46336	48079	41837	45969	47537	49593	48368	50060	50022	47224	49710	49178	47525	50624	47926	48260	47607	51123	49848	50613	45703	46293	50031	47829	47987	49732	47827	45404	47325	49035	48557	49159	48575	47255	48338	45855	46659	47065	47382	49691	45612	0	50152	50415	49382
2005	B63_S81	47185	52115	50759	50255	49925	49728	50338	51037	45585	50649	27945	47471	50555	52452	52061	51547	47534	50694	51043	51319	48390	46989	46137	50094	50771	46394	50376	50382	52659	50190	50523	50928	51358	51033	51166	51766	50221	51166	49743	50590	50957	50741	46703	50258	50152	0	46617	46715
2005	B65_S83	48033	52140	51019	50555	50689	50572	51050	51645	46774	50836	45255	48050	50665	52286	52556	51939	47934	50880	51159	51451	48342	47542	44985	50860	50656	47650	50792	50778	52817	51037	50698	51366	51833	51600	51451	51536	50954	51762	50436	51089	51253	50921	47090	50595	50415	46617	0	47140
2005	B67_S85	45894	51300	49351	48871	49618	49033	49333	50390	44233	50049	45988	45991	49656	51220	51344	50619	46297	50157	49983	50121	46165	43720	46674	48668	49310	45805	49676	49495	51710	49052	49324	49843	51024	50489	50265	50738	49396	50131	48856	49388	49842	49539	45794	49330	49382	46715	47140	0
2005	B69_S87	46296	51365	49200	49199	49731	49253	49127	50461	45047	49678	47073	47087	49530	50888	51223	50752	46225	49905	50193	50127	47844	43870	47603	48837	48655	46896	49958	50204	51726	49632	49352	49451	51037	50836	50568	50623	49510	50361	48896	49160	50027	49483	46096	49103	49269	47884	47842	45885
2005	P21_S10	52429	46091	48633	49161	50544	48850	48786	49730	51767	50323	52116	51857	s	30704	47511	50333	52528	50145	50709	50556	53160	51883	52669	47999	49553	51715	49926	49828	51960	49870	48760	48501	51937	51392	51225	50583	50308	48866	48838	48812	50358	49712	51720	48021	49311	52589	52538	51760
2006	27P_S14	46529	51166	50031	49583	50117	49539	50055	50796	42810	50312	45886	46569	50311	51232	51781	51499	46451	50438	50569	50373	46246	28619	47298	49475	49724	44961	50419	49727	52255	50486	49570	50214	51546	50982	51087	51312	50147	50397	49241	49241	49990	50332	46051	49216	49917	47062	47573	43611
2006	32P_S19	50481	47004	40264	37675	46141	43885	41810	44709	49584	45366	50280	49003	44516	47464	49117	46429	50344	44229	46378	44385	50786	49838	50313	21341	41966	49297	44727	44686	43401	43945	41655	41446	48161	47688	47012	46806	46070	45843	43376	38637	42141	42986	49238	37732	46041	50537	51099	49103
2006	B73_S91	50886	49299	46196	45537	44623	47331	46580	47798	49786	43704	50559	49709	43439	50412	50500	48749	50935	43718	44536	44724	51299	50426	50977	45957	47505	49961	41835	43925	49101	43501	46738	45708	49118	48975	44704	48410	45002	48823	45220	45525	47303	44449	49996	45794	48014	50871	51136	49723
2006	B74_S92	51364	47302	45911	45436	48684	47640	47128	48610	50913	48292	51247	50583	47850	47712	47673	49542	51420	48263	49294	48180	52241	51027	51561	45853	47276	50326	47943	48074	49612	48017	45527	46345	50336	49909	49776	48914	48477	48297	46959	45333	48010	47737	50917	45657	47899	51630	51758	50722
2006	B76_S94	50749	48498	47835	46676	49253	47624	47666	48621	50055	49128	50417	50744	48198	47876	48840	49330	51173	48908	49784	49072	51868	50285	51512	46453	47835	50023	49076	48573	50606	48808	47656	47889	50449	49824	49674	49702	49276	32951	47674	47089	48863	48176	50194	47043	48456	50883	51267	50194
2006	B77_S95	46882	50818	48992	48812	49821	49252	49121	50252	43439	50181	46114	45823	50086	50916	51355	50790	45643	50329	50542	50310	47208	25349	47336	48769	48652	44460	49967	49487	52037	50038	49321	50022	51467	51099	50565	50867	49795	50144	48964	49344	50040	49837	45672	49256	49172	46974	47896	44323
2006	B78_S96	52471	54009	53178	52422	53029	52232	53067	52901	52076	53159	52023	52376	52874	53689	53708	53048	52335	53118	53514	53682	52322	52094	52422	52648	52985	52423	53139	53143	54844	53054	52863	53242	52452	52417	53201	53389	52586	53355	52368	53015	53366	52850	52428	52273	52354	51871	51961	51901
2006	B79_S1	48127	52465	51468	51416	51183	50912	51078	51705	46898	51534	45058	48704	51220	51898	52604	52212	48612	51660	51844	51876	49138	47353	48894	51081	51330	47984	51491	51029	53387	51515	51536	51535	52591	51862	52219	52381	51154	51704	51025	51439	51713	51560	47948	51461	50801	46621	48839	47491
2006	P164_S40	47380	51887	50539	50311	50294	50145	50505	51004	46060	50679	37315	47182	50372	51964	52355	51666	47778	50506	51182	50921	47689	46569	46331	50419	50218	47296	50267	50417	52613	50257	50223	50886	51346	51084	51097	51576	50201	50906	49686	50358	50623	50644	46780	50325	50555	39540	45740	47012
2006	P28_S15	50364	48630	44671	44358	43755	46801	45807	47418	49522	44527	50242	49518	39953	49175	49333	48331	50997	42213	44530	43052	51038	49859	50380	44664	46188	49712	42535	42996	48003	43969	45770	44279	48806	48561	43404	47297	43897	48388	45087	44185	45798	41096	49812	44297	47660	50763	50853	49505
2007	38P_S23	50834	47253	40737	40216	46913	45055	43519	45971	50031	45785	50425	49644	45361	48554	49297	47328	50768	45905	46689	45515	51352	49905	50648	40302	44625	49686	45532	45695	45798	45389	44342	43711	48671	48224	47292	47298	46830	47096	43819	40916	43676	44003	49476	40239	46811	50662	51072	48887
2007	B82_S4	47154	52303	50907	50546	50498	50365	50461	51623	44799	51120	46141	47986	50784	52364	52941	51890	47762	50749	51160	51268	48680	46991	43799	50401	50666	47624	50989	50947	52892	50834	50572	50961	51506	51119	51623	52095	50696	51441	50079	50694	51549	50963	47149	50436	50388	46620	41122	46752
2007	B85_S7	50685	48970	45654	45096	44208	47303	46785	47934	49638	43963	50447	49983	42520	49869	50408	49225	50612	43294	44419	44210	51060	50183	51001	45026	47579	49936	40398	42843	48743	43482	46766	45551	49237	48956	45403	48083	42962	48891	45675	45152	47095	43855	49883	45442	48002	50925	50858	50211
2007	B88_S10	45620	50436	49092	48431	48864	49018	48991	50188	44239	49524	45506	45919	49152	51123	51341	50942	46566	49553	49859	49877	47477	44948	46171	48703	48397	45714	48964	49422	51519	49057	48968	49316	50877	50103	50493	50686	49483	49982	48432	49207	49851	49120	45413	48536	48998	46065	46494	44873
2007	B89L_S11	50531	48092	45040	43924	43510	46617	46278	47757	49394	43091	50154	49559	22274	48843	49475	48223	50687	43140	43986	43017	50663	49791	50670	43660	46646	50343	41604	43083	48093	44447	46056	44880	48665	48484	44415	47870	43353	47651	44981	44352	45827	25104	49490	44337	47537	50556	50480	49454
2008	B91_S12	50421	53659	52218	51885	51943	52216	52525	52905	49582	52179	49661	50455	51831	53375	53699	53300	50466	52581	52504	52106	51542	50449	50033	52188	52324	50097	52044	52292	54590	52071	52008	52349	51724	51235	52643	53137	51998	52749	51267	52009	52720	52008	50052	52052	52049	49874	49737	50265
2008	B93_S14	50385	48550	45089	43364	43047	46501	46163	47799	49577	42615	50169	49082	42253	49664	49686	48517	50532	42307	43301	42921	51130	50025	50611	44754	46836	49816	39720	42756	48390	42914	46200	44823	48751	48354	45365	48236	42420	48860	44950	44298	46874	43555	49601	44804	47660	50497	50300	49380
2008	B95_S16	51863	50209	48609	47921	48846	49104	48658	48782	51145	48383	51989	51305	48339	50168	50133	49182	52082	48330	49042	48763	52329	51462	51990	47351	48893	51173	48312	49020	50520	48073	48324	48505	49161	48662	49097	44926	47904	50063	47217	48135	48565	48509	51591	47444	49139	51885	52134	51207
2008	B96_S17	51259	46886	41507	40451	46930	45069	43207	42435	49999	46736	50520	49450	46262	48394	49376	42140	50940	46143	47262	46050	51294	50427	50727	41644	44219	49884	45673	45483	46443	45986	43793	42649	48562	48262	47696	47669	46560	47391	43881	42175	44505	45078	49872	41570	46510	50906	51318	49638
2009	B100_S21	50683	48253	44706	43612	43422	46921	45318	48067	49575	43129	50510	49462	41516	49377	49771	48842	50356	42254	43657	42245	50913	49986	50946	44616	46633	49868	38209	42328	48318	40341	45463	43415	48730	48519	45074	48104	43653	48865	44194	44131	46000	41556	49215	43868	47721	50742	50976	49506
2009	B102_S23	44177	50899	50210	49389	49525	49227	49558	50325	43202	49769	44993	45798	49300	51210	51560	50930	46109	49854	49842	50155	46722	45124	45134	49406	49325	45955	49662	49757	51966	49605	49555	49849	50974	50390	50247	50848	49567	50339	49068	49673	50328	49375	45334	49532	49295	45934	46234	44535
2009	B97_S18	51645	50231	47945	47168	48461	48323	48595	48712	50624	48632	51191	51090	48168	50278	50728	49665	51382	48578	48866	48497	52114	50978	51873	47216	48534	50724	47940	48798	50466	48051	47925	47740	49559	49087	49097	47354	47827	50251	46319	47842	48466	48094	51202	46842	48126	51496	51874	50523
2009	B99_S20	45851	50859	49339	48897	48853	48704	49052	49928	43544	49775	44992	46066	49280	51152	51408	50936	45712	50013	49503	49945	46591	45063	45587	48690	49329	44968	49523	49028	51694	49128	49177	49408	50804	50003	49685	50567	49013	50007	48271	49149	49265	48938	44803	48494	48843	45615	46148	43304
2009	P42_S25	48678	52072	51615	50705	51095	51047	51105	51720	48302	51743	48110	49691	50970	52630	52671	52135	49620	51538	51504	51796	50062	49334	48580	50914	51418	48851	51506	51244	53374	50781	51019	51600	51836	51604	52025	52458	51002	51676	50577	51444	51808	51267	48937	51085	50710	48414	48479	48892
2010	44P_S26	51441	49074	45194	44153	47682	45621	46355	42032	50784	47898	51518	50480	47527	49333	49730	42528	51475	47682	48577	47269	51818	50580	51806	43764	45965	50075	47029	47254	48301	46828	45166	45698	49646	48953	49293	48564	47755	48399	45857	45823	46167	46971	50680	44264	47429	51556	51796	50500
2010	B105_S26	48155	50471	50200	49985	50306	49646	50577	51179	46230	50904	47968	48799	50573	50584	50547	51775	48345	51172	50954	51207	49447	47481	48616	50187	50483	47515	50612	50868	52609	50595	50424	50567	51846	51338	51006	51392	50238	50468	50047	50369	51249	50911	47410	50169	50431	48315	48801	47651
2010	B106_S27	49217	52234	51343	51055	51022	50955	51205	52082	48471	51114	48897	49852	50719	52816	52734	52402	49827	51234	51297	51404	50838	49276	49037	51237	51441	49089	51147	51054	53172	50908	51195	51553	51686	51410	51400	51868	51039	51953	50072	51359	51788	51214	49242	50656	51057	48626	49075	49084
2010	B107_S28	51950	50945	48609	47402	49345	48917	48728	49626	51639	49596	51856	51463	49123	51258	51988	50410	52227	49624	48992	48934	52484	51814	52592	47490	49053	51357	48709	48843	51206	49221	48844	48204	50630	50245	49882	48777	49363	50739	47577	47482	49239	49198	51712	47056	49182	52120	52568	51304
2010	B110_S31	50609	46480	40285	38742	45714	43002	42077	44552	49360	45501	50183	49222	43801	48089	48524	45413	50569	44548	46371	44095	51217	49944	50671	37693	43272	49194	44294	44292	44654	45041	42206	41302	47998	47503	46934	47195	44389	46725	42900	38884	42454	43362	49315	38238	45942	50407	50766	49375
2010	B111_S32	50008	45110	40287	38484	45945	42950	42073	43606	49503	45721	49874	48770	45168	47630	49084	44469	50571	45196	46955	44768	50687	49579	50518	39741	43320	49460	44630	45496	46002	44748	42540	42819	48106	47628	47301	47118	46357	47012	43454	40567	43069	44195	49091	39164	45661	50483	50908	49286
2010	B112_S33	45931	51434	50092	49593	49527	49614	49908	50713	41153	50358	45148	45894	49777	51548	51513	51255	45884	50277	50271	50297	45897	37727	46319	49500	49827	44097	49892	49760	52220	50131	49710	50396	51191	50258	50445	51007	49654	50614	49220	49865	50382	50098	44146	49702	49823	46086	46939	43330
2010	B113_S34	50231	45394	39360	37955	46223	43660	42168	44975	49479	44483	49832	48783	44042	47327	48766	45525	50484	44585	45740	44195	50795	49656	50459	37119	43341	48890	44788	44617	44699	44548	41861	40690	47712	47282	46955	47022	45591	46239	42418	38115	42653	42734	49327	36270	45829	50102	50793	48942
2010	B114_S35	51105	49563	47254	46552	44567	48123	47824	48896	49933	42232	50895	50242	43679	50076	50394	49611	51199	43294	45443	45284	51716	50564	50585	46473	48246	50697	43681	45418	49209	45045	47653	45824	49321	49200	46039	48804	44422	49657	45993	46476	47865	44866	50351	46511	48851	51015	51111	50536
2011	50P_S29	52340	40859	46713	46340	49611	47850	47500	48682	51554	49613	52032	51181	48531	44836	47782	49495	51935	49268	49721	49207	52622	51362	52075	46369	48308	50980	48223	48849	50698	48412	47685	47529	50711	50699	50059	50077	50010	47579	47717	46620	48486	48301	51523	45977	49615	52233	52415	51249
2011	B116_S37	50812	47422	40874	38890	46150	44226	42876	45578	49938	45165	50572	49647	44198	47691	48931	46557	50784	44920	45814	44305	51124	49911	51006	37997	43730	49295	44796	44530	45533	44617	42664	40585	47869	47643	47265	47317	45680	46377	43427	39264	42415	43422	49538	38635	46162	50647	51104	49676
2011	B117_S38	46458	51286	49433	49285	49017	49257	49547	50256	45374	49324	46445	46987	49123	51383	51411	50962	46665	49155	49509	49953	47971	46677	46939	48952	49333	46418	49157	49350	51307	49102	49282	49457	50422	50010	49861	50245	48577	50095	48295	49223	49838	49293	45963	48883	48851	46961	47248	46201
2011	B119_S40	46744	51580	50337	50079	50173	49792	50166	50995	45268	50480	37680	47431	50264	51871	52164	51643	47388	50347	50940	50983	47484	46060	45938	49970	50186	46356	50352	50273	52856	50331	50121	50412	51414	50975	50695	51462	50041	50740	49505	50396	50928	50522	46568	50224	50030	39314	46593	46734
2011	B121_S42	45408	51005	49477	48358	49626	48732	49290	49964	43657	49972	46490	45823	49234	51258	51641	50480	46800	49421	50381	49650	46607	43281	46606	48616	49009	45671	49447	49385	51423	49428	49575	49565	51201	50797	50330	50648	49474	50216	48490	49214	50176	49178	46070	48577	49316	46843	46641	45231
2011	B122_S43	50774	46928	38109	36790	45971	43979	40531	43930	49823	45313	50418	49294	44933	47928	49355	46511	50725	45069	46642	45358	51180	49993	51149	38259	42341	49025	45252	44801	44814	44871	42550	41164	48269	47830	47735	47592	45933	46583	42683	34928	42429	43591	49516	38412	46519	50938	51321	49300
2011	B124_S44	46188	51349	49955	49262	49335	49459	49811	50324	44588	49714	45525	46864	49249	51437	51594	50910	46098	49880	49831	50193	47323	45670	46808	49575	49387	45837	49558	49537	51629	49420	49625	50004	50558	50192	50157	51056	49341	50456	48808	49831	50136	49805	45746	49161	49182	45781	45979	45601
2011	B125_S45	49967	45677	39696	38351	45944	42743	41969	43705	49271	45631	49735	48647	44926	47580	48932	44639	50303	45562	46613	45087	50663	49611	50425	39512	43374	49263	44582	45495	45758	44558	42629	42557	47726	47352	47286	47129	46311	47036	43053	40390	42814	44082	48855	38714	45853	50336	50823	49261
2011	B126_S46	50413	46542	39656	35766	45913	43660	42986	44890	49565	45329	50082	48732	44671	48210	48824	47147	50390	45355	46827	45167	50861	49698	50500	38689	43133	49161	44202	44856	45541	44324	41395	41972	47863	47802	47141	47316	45666	46708	42793	37859	43089	43321	49490	38167	46033	50566	50743	49162
2011	B128_S47	46986	50981	49427	48863	49618	49085	49252	50091	43896	50258	46083	46109	49419	51087	51259	50628	45867	49992	50345	50070	46392	37091	46760	48886	48835	45414	49797	49312	51688	49761	49497	49545	51452	50984	50300	50610	49804	50099	48987	49236	50050	49471	46075	49037	49645	46530	47828	43734
2011	B129_S48	50641	48593	44901	43766	44229	46611	45721	47684	49324	42548	50365	49050	28818	49432	49449	48059	50502	42177	44574	42267	51010	49753	50493	43497	46592	49887	42379	43847	48448	43581	45838	43634	48769	48471	44532	47919	43543	48030	44875	44134	46063	31996	49699	44221	47437	50586	50859	49444
2012	52P_S30	50318	49215	46587	45848	35074	46888	46551	48281	49737	43824	50078	49549	43374	49556	49776	48816	50418	44059	43429	44965	50519	49809	50644	45243	47535	49323	42786	36498	48481	43477	46231	45702	48676	48289	45250	47653	43546	48244	45767	45812	46501	44165	49304	45498	47756	50302	50614	49467
2012	B132_S51	46371	51399	49707	49305	49270	49382	49567	50328	45503	49852	46741	46932	49635	51780	51800	51103	46656	50089	50162	50051	48549	46576	47193	49038	49587	46595	50021	49846	51759	49436	49689	50034	50894	50388	50251	51091	49388	50465	48690	49803	50004	49747	46334	49379	49492	46968	47464	46643
2012	B134_S53	50400	49067	46392	45179	42070	47805	46767	48482	49779	44284	50243	50063	43419	49748	50334	48803	50640	43971	43717	43860	51236	50417	50769	45139	47366	50014	43125	40960	48733	43146	46339	45796	48721	48718	45606	48385	44283	48774	46248	46079	46990	44530	49848	45681	47994	50290	50888	49585
2013	B137_S55	52043	49035	46285	45470	48917	46705	47588	44608	50808	48353	51766	51238	47812	49504	50392	45194	51700	48309	49358	48673	51907	51493	51726	45288	47204	50516	47803	48190	48935	47975	46963	46451	49713	49048	49231	48836	47891	48893	46196	46118	47294	47250	50986	44973	48067	51545	51994	50946
2013	B139_S57	46793	51645	50117	50055	50211	50190	50330	50812	45485	50542	45012	46954	50050	51897	52036	51601	46996	50623	50676	50864	48186	46478	19269	49908	50186	46138	50762	50249	52755	50157	50109	50690	51630	51233	51148	51330	50453	51020	49589	50305	51103	50036	46659	49955	49976	45592	44372	45905
2013	B140_S58	44098	50614	49305	48922	48827	48970	49397	49990	41680	49302	43965	45018	49190	51040	51027	50363	44886	49437	49876	49844	45887	43120	45346	48823	48975	44713	49217	48992	51500	49234	48737	49196	50288	49481	49920	50339	48705	49768	48372	49109	49403	49226	43980	48756	48833	44756	45426	43584
2013	P55_S33	50415	45647	39653	38334	45820	43720	42287	44718	49726	44908	49990	48794	43972	47687	49061	45567	50663	44644	46559	44806	50901	50044	50469	37384	43252	49307	44680	44593	44637	44835	41949	40193	47781	47788	46641	47038	45565	46323	42817	38923	42638	42865	49322	37985	46021	50243	50655	49460
2014	B146_S64	50941	48970	46630	46547	45393	48198	47154	48585	50204	43290	50925	50059	43315	50002	50510	49449	50971	43626	43701	45742	51601	50596	51334	46961	47596	50443	44229	44530	49690	45162	46511	45319	49456	49697	45490	48894	44843	49187	46025	46011	47776	44556	50282	46214	48599	51017	51051	50023
2014	B147_S65	46101	51436	50129	49717	49853	49672	49854	50880	45169	50375	45850	47413	50596	51473	52106	51426	46632	50098	50419	50708	46785	44581	46336	49209	49825	45944	50146	49951	52503	50347	49916	50316	51405	50734	50810	51184	49876	50667	49263	50109	50839	50717	46601	49331	50092	46664	46917	46273
2014	B148_S66	46668	51049	49697	49436	49971	49387	49613	50544	44418	50327	46023	46002	49775	51281	51610	51143	46484	50139	50057	50093	47794	44307	46962	49387	49643	46367	50092	49567	51523	49731	49031	50265	50857	50585	50434	51082	49664	50262	49101	49852	50258	49926	45616	49340	49358	46765	46935	45071
2014	B151_S69	50617	48513	45121	44687	43793	47159	46110	47992	49788	43617	50633	49345	41200	49301	49711	48537	50681	34594	44117	41252	50853	49935	50807	44280	46288	49618	41493	43585	48294	44334	45893	43963	48953	48785	44918	48176	44596	48526	44336	44587	45842	41591	49729	44786	47593	50878	50805	49741
2014	B153_S71	50798	47277	41278	39309	46229	45327	43863	46345	50291	45843	50431	49334	44453	48216	49534	47650	51001	45239	46776	45556	50981	49998	50946	39790	44668	50042	45551	44567	45426	45545	43889	42477	49080	48902	47377	48647	46503	47553	44566	40313	43832	44063	49573	39737	47132	50583	51105	49718
2014	B155_S73	47149	50859	49131	48950	49207	49129	49081	50434	44506	49917	46580	43561	49291	51405	51255	50617	38614	49920	49858	49961	47178	43055	47330	48453	48875	38117	49560	49514	51805	49419	49672	49002	51260	50907	50621	50903	49420	50110	48435	49169	50040	49257	39138	48880	49495	46996	47798	45397
2014	P59_S35	50400	48578	45102	43167	40328	47098	46281	47784	49598	44669	50183	49597	42802	49062	50177	48395	50282	42877	45062	42475	51050	49983	50478	44100	46346	49589	41093	39281	48472	43158	45363	44666	48984	48629	45884	48105	44605	48727	45871	44457	46458	43683	49343	44542	48059	50203	51019	49531
2015	61P_S37	47145	51326	50348	49766	49757	49509	50323	50559	44864	50546	46678	42305	50104	51822	51766	51175	35291	50539	50571	50554	47729	45963	47348	49635	49669	36541	50327	50467	52464	50101	50146	50274	51216	50852	50766	51400	50072	50565	49555	49975	50773	50247	10288	49698	49956	46880	47465	46514
2015	62P_S38	50463	48828	45309	44755	43739	47287	46515	47861	49833	43318	50281	49663	41536	50033	49807	48526	50895	42840	43837	42454	51567	50045	50669	44598	46755	50024	42100	43455	48191	44272	45962	44600	48824	48616	42919	47846	43309	49044	44733	44785	46176	41957	49493	45245	47765	50632	50691	49769
2015	B156_S74	51984	27824	46617	46175	49228	47969	47064	49192	51352	49301	51458	51183	47518	45270	47046	49582	52174	48474	49918	48678	52577	51319	52013	46581	47027	50827	48951	49271	49369	48988	46400	46750	50895	50506	50134	49488	49574	48258	47482	45585	47894	47346	51052	45724	48827	52007	52065	51308
2015	B157_S75	51715	45476	46033	46170	49361	47790	47450	49529	51192	48885	51267	50711	48578	47452	48025	50379	51837	48928	49918	48929	52237	50656	51533	46513	46996	50929	48515	48432	49938	48504	45742	46153	50861	50120	50161	49707	49173	48777	47263	45608	48605	48221	51058	45859	48984	51693	51989	50906
2015	B158_S76	50424	53706	52196	52048	51790	52004	52266	52677	49659	52368	49854	50478	51952	53267	54014	53170	50482	52402	52276	52569	51381	50016	49396	52231	52108	50104	52256	51911	54430	52235	52230	52337	52742	52314	52420	53113	51920	52693	51619	52149	52702	51992	50028	52181	52121	49607	49623	49768
2015	B159_S77	58850	61718	60830	60453	60490	60857	60640	61728	59030	61027	58912	59074	60893	61756	62331	62313	58648	60988	60345	61463	58636	59044	58613	60757	60690	58777	60737	60472	62803	61131	60942	60559	61977	61564	60613	61779	60874	60732	60763	60819	61526	60921	58960	60920	60614	59394	59035	58888
2015	B161_S79	50545	48902	45743	44871	44420	47175	46644	47979	49593	44263	50301	49991	42489	49705	50228	49104	50370	43178	44168	43755	51033	50135	50902	44991	47369	49722	41298	42660	48604	43609	46629	45460	48973	48826	45064	48259	43388	48845	45708	44907	46938	43885	49581	45589	47954	50837	50807	50153
2015	B162_S80	50952	48651	44948	44122	39928	46887	45645	47498	49864	44056	50443	49896	43480	49517	49981	48139	50718	43886	44179	43781	51027	50390	50989	43732	46871	50272	42697	38893	47960	42639	46192	44217	48850	48397	45486	47777	44417	48575	45526	44144	45915	44477	49768	44330	47962	50557	50903	49758
2015	B163_S81	47427	50631	49197	49137	50161	49261	49262	50073	46419	50330	47490	47756	49662	51381	51760	51013	47576	49945	50576	50332	49163	46714	47781	49031	49398	47246	50116	49992	51765	49789	49363	49512	51354	51073	50609	50764	49962	50418	49289	49276	49864	49450	46909	49165	49486	47843	47913	47223
2015	B165_S83	50580	48848	46370	45393	42803	47230	47160	47637	49525	43827	50153	50061	40406	49764	50332	48912	50649	42746	43093	43118	51335	49894	50821	45437	46714	50069	41635	42989	48762	44069	46306	45237	48890	48425	43042	47999	43505	48935	45515	45948	46412	41538	50095	45369	47432	50586	50887	49735
2015	P60_S36	50792	48259	44756	44551	44458	46815	45693	47671	49310	43282	50344	49457	31550	49525	49662	48028	50475	43695	43980	44320	51209	50015	50506	44778	46648	49821	42280	43480	47528	43728	45891	44533	48463	48372	44686	47810	43628	48696	43876	44812	46284	33509	49784	44312	47724	50857	50809	49747
2016	B166_S84	46017	50929	49484	48730	49049	48763	49282	50092	42163	49796	44844	45627	49417	51199	51450	50414	45776	49665	49810	49989	46247	44415	46160	48870	49111	44839	49367	49501	51830	49452	49100	49785	50809	49999	50205	50677	49487	50127	48613	49173	49793	49637	45052	48961	49109	45386	46284	44827
2016	B167_S85	45179	50681	49251	48851	48878	48920	49122	49639	43465	49120	44445	45604	48939	51069	51162	50382	45663	49417	49265	49455	46502	44301	44836	48960	48943	44853	49043	48854	51375	48671	49014	49139	50371	49754	49584	50031	48941	49960	48348	48916	49528	48928	44334	48654	48714	45181	45408	44291
2016	B168_S86	45103	50529	49981	49628	49761	49609	49922	50451	44040	50062	45267	46145	49746	51335	51370	51074	45650	50251	50376	50306	46785	44685	45619	49648	49803	45391	50026	50084	52158	50082	49696	50151	51427	50851	50335	50871	49700	50293	49026	49772	50596	49726	45823	49768	49785	46156	46067	44753
2016	B169_S87	47950	52603	51161	50947	50772	50833	51316	51680	45320	51120	45739	48243	50911	52739	52985	52187	48095	50960	51568	51333	48443	47560	44440	51158	51007	47699	51408	51121	53155	51033	50869	51522	51978	51522	52172	52433	50896	51752	50370	51082	51625	51096	47615	51190	50863	45719	41591	46957
2016	B170_S88	47813	52020	51093	50990	51049	50629	51017	51677	45526	51182	47419	48247	50943	51941	52196	51871	47487	51247	51486	51735	48718	44702	48885	50990	50855	47503	51413	51084	52893	51202	51105	51359	51516	51162	51854	51912	50792	51362	50495	51330	51514	51155	47673	51117	50496	48262	48066	46634
2016	B172_S90	50566	48597	45149	44477	43363	46307	45909	47872	49552	42637	50276	49374	42929	49289	49678	48359	50670	42604	44377	43092	51016	49815	50488	44712	46810	49595	39631	42665	48649	42071	45506	44721	48411	48588	45020	47768	44037	48122	44707	44585	46382	44387	49648	43819	47795	50358	50562	49546
2016	B173_S91	50689	48177	44932	44621	44252	46840	45658	48098	49759	43815	50582	49478	40164	49108	49754	48758	50710	43244	44708	43934	51343	50118	50640	44831	46492	49704	42461	43994	47924	44058	46145	44289	48671	48594	45779	48039	44747	48100	45016	44273	46239	42104	49885	44326	47897	50707	50719	49809
2016	B174_S92	52248	45791	48555	48083	50222	49084	49002	49328	51482	50116	52098	51928	49573	31811	47617	50122	52496	49672	50487	49982	53014	51614	52113	48234	48966	51399	49777	50119	51434	49882	47985	48595	51521	50725	50536	50281	49929	48650	48533	47979	49658	48865	51883	47833	49125	52442	52521	51539
2016	B176_S94	50720	48526	45115	44778	43751	47251	46045	48008	49829	43752	50734	49380	41533	49508	49729	48579	50634	34733	44507	41235	50979	49865	50836	44205	46348	49703	41523	43636	48353	44413	45919	44103	49148	48957	44937	48095	44620	48515	44438	44618	45912	41774	49695	44889	47742	50933	50849	49796
[truncated: 80 more columns]

## Sheet: Data 4 
Isolate ID	Genome acccession	Global Sequence Cluster	Sequence type	Isolation source	Country	Genome source
103U_S92	GCF_946186075.1	5	141	Carriage	United Kingdom	NCBI
125U_S4	GCF_946184935.1	4	216	Carriage	United Kingdom	NCBI
128U_S6	GCF_946186995.1	11	27	Carriage	United Kingdom	NCBI
12P_S5	GCF_946186085.1	258	158	Infective endocarditis	United Kingdom	This study
13P_S6	GCF_946187105.1	257	5	Infective endocarditis	United Kingdom	This study
14P_S7	GCF_946186685.1	256	6	Infective endocarditis	United Kingdom	This study
161U_S19	GCF_946188375.1	255	40	Carriage	United Kingdom	NCBI
1P_S1	GCF_946183265.1	254	236	Infective endocarditis	United Kingdom	This study
22P_S11	GCF_946183395.1	253	201	Infective endocarditis	United Kingdom	This study
27P_S14	GCF_946184735.1	252	15	Infective endocarditis	United Kingdom	This study
32P_S19	GCA_946223905.1	251	205	Infective endocarditis	United Kingdom	This study
38P_S23	GCF_946183455.1	250	173	Infective endocarditis	United Kingdom	This study
3P_S2	GCF_946183495.1	249	245	Infective endocarditis	United Kingdom	This study
44P_S26	GCF_946186695.1	248	237	Infective endocarditis	United Kingdom	This study
50P_S29	GCF_946188075.1	247	230	Infective endocarditis	United Kingdom	This study
52P_S30	GCF_946186135.1	246	257	Infective endocarditis	United Kingdom	This study
61P_S37	GCA_946183505.1	245	195	Infective endocarditis	United Kingdom	This study
62P_S38	GCF_946183485.1	244	74	Infective endocarditis	United Kingdom	This study
68U_S84	GCF_946183445.1	243	55	Carriage	United Kingdom	NCBI
7P_S3	GCF_946185985.1	242	38	Infective endocarditis	United Kingdom	This study
B1_S23	GCA_946189985.1	185	206	Infective endocarditis	United Kingdom	This study
B10_S32	GCF_946183015.1	232	177	Infective endocarditis	United Kingdom	This study
B100_S21	GCA_946186585.1	241	31	Infective endocarditis	United Kingdom	This study
B1015B24C5	GCA_905220945.1	29	80	Carriage	Gambia	NCBI
B1015G24C3	GCA_905221115.1	240	115	Carriage	Gambia	NCBI
B1015H24C1	GCA_905221235.1	239	127	Carriage	Gambia	NCBI
B1015H24C3	GCA_905221375.1	238	87	Carriage	Gambia	NCBI
B1015H24C4	GCA_905221455.1	237	73	Carriage	Gambia	NCBI
B102_S23	GCA_946183435.1	236	124	Infective endocarditis	United Kingdom	This study
B105_S26	GCA_946185425.1	235	140	Infective endocarditis	United Kingdom	This study
B106_S27	GCF_946184175.1	234	238	Infective endocarditis	United Kingdom	This study
B107_S28	GCF_946184385.1	233	85	Infective endocarditis	United Kingdom	This study
B110_S31	GCF_946185245.1	231	156	Infective endocarditis	United Kingdom	This study
B111_S32	GCF_946185595.1	230	170	Infective endocarditis	United Kingdom	This study
B112_S33	GCA_946185795.1	229	24	Infective endocarditis	United Kingdom	This study
B113_S34	GCF_946186035.1	228	160	Infective endocarditis	United Kingdom	This study
B114_S35	GCF_946184755.1	227	26	Infective endocarditis	United Kingdom	This study
B116_S37	GCA_946186655.1	226	162	Infective endocarditis	United Kingdom	This study
B117_S38	GCF_946184245.1	225	75	Infective endocarditis	United Kingdom	This study
B119_S40	GCF_946184705.1	224	186	Infective endocarditis	United Kingdom	This study
B12_S34	GCF_946187535.1	216	7	Infective endocarditis	United Kingdom	This study
B121_S42	GCF_946184465.1	223	11	Infective endocarditis	United Kingdom	This study
B122_S43	GCF_946183295.1	222	180	Infective endocarditis	United Kingdom	This study
B124_S44	GCF_946184765.1	221	194	Infective endocarditis	United Kingdom	This study
B125_S45	GCF_946186825.1	220	169	Infective endocarditis	United Kingdom	This study
B126_S46	GCF_946183535.1	219	183	Infective endocarditis	United Kingdom	This study
B128_S47	GCF_946187305.1	218	94	Infective endocarditis	United Kingdom	This study
B129_S48	GCF_946183555.1	217	144	Infective endocarditis	United Kingdom	This study
B13_S35	GCF_946184335.1	210	35	Infective endocarditis	United Kingdom	This study
B132_S51	GCF_946188115.1	215	66	Infective endocarditis	United Kingdom	This study
B133-2_S52	GCF_946187925.1	214	120	Infective endocarditis	United Kingdom	This study
B134_S53	GCF_946183695.1	213	32	Infective endocarditis	United Kingdom	This study
B137_S55	GCF_946183685.1	212	96	Infective endocarditis	United Kingdom	This study
B139_S57	GCF_946183965.1	211	164	Infective endocarditis	United Kingdom	This study
B14_S36	GCF_946188365.1	205	258	Infective endocarditis	United Kingdom	This study
B140_S58	GCF_946188035.1	209	146	Infective endocarditis	United Kingdom	This study
B146_S64	GCA_946184845.1	208	102	Infective endocarditis	United Kingdom	This study
B147_S65	GCF_946188285.1	207	81	Infective endocarditis	United Kingdom	This study
B148_S66	GCF_946185855.1	206	196	Infective endocarditis	United Kingdom	This study
B15_S37	GCA_946188735.1	198	86	Infective endocarditis	United Kingdom	This study
B151_S69	GCA_946185905.1	28	30	Infective endocarditis	United Kingdom	This study
B153_S71	GCA_946188725.1	204	253	Infective endocarditis	United Kingdom	This study
B155_S73	GCF_946185295.1	203	178	Infective endocarditis	United Kingdom	This study
B156_S74	GCF_946189305.1	202	48	Infective endocarditis	United Kingdom	This study
B157_S75	GCA_946188715.1	201	78	Infective endocarditis	United Kingdom	This study
B158_S76	GCA_946188825.1	200	68	Infective endocarditis	United Kingdom	This study
B159_S77	GCF_946188815.1	199	107	Infective endocarditis	United Kingdom	This study
B161_S79	GCF_946188505.1	27	36	Infective endocarditis	United Kingdom	This study
B162_S80	GCF_946188645.1	197	259	Infective endocarditis	United Kingdom	This study
B163_S81	GCF_946188665.1	196	220	Infective endocarditis	United Kingdom	This study
B165_S83	GCF_946188525.1	195	37	Infective endocarditis	United Kingdom	This study
B166_S84	GCF_946188555.1	194	14	Infective endocarditis	United Kingdom	This study
B167_S85	GCF_946188435.1	193	51	Infective endocarditis	United Kingdom	This study
B168_S86	GCF_946188425.1	192	240	Infective endocarditis	United Kingdom	This study
B169_S87	GCF_946189595.1	191	222	Infective endocarditis	United Kingdom	This study
B170_S88	GCF_946189625.1	190	70	Infective endocarditis	United Kingdom	This study
B172_S90	GCF_946189565.1	189	25	Infective endocarditis	United Kingdom	This study
B173_S91	GCF_946188785.1	188	211	Infective endocarditis	United Kingdom	This study
B174_S92	GCF_946189255.1	187	131	Infective endocarditis	United Kingdom	This study
B176_S94	GCF_946188865.1	28	30	Infective endocarditis	United Kingdom	This study
B19_S40	GCF_946190005.1	186	200	Infective endocarditis	United Kingdom	This study
B20_S41	GCF_946190035.1	184	165	Infective endocarditis	United Kingdom	This study
B21_S42	GCF_946189125.1	183	143	Infective endocarditis	United Kingdom	This study
B22_S43	GCF_946189035.1	182	129	Infective endocarditis	United Kingdom	This study
B26_S45	GCF_946189055.1	181	95	Infective endocarditis	United Kingdom	This study
B3_S25	GCF_946189635.1	174	93	Infective endocarditis	United Kingdom	This study
B30_S48	GCF_946189895.1	180	33	Infective endocarditis	United Kingdom	This study
B31_S49	GCF_946188485.1	179	103	Infective endocarditis	United Kingdom	This study
B33_S51	GCF_946188605.1	178	174	Infective endocarditis	United Kingdom	This study
B34_S52	GCF_946189235.1	177	152	Infective endocarditis	United Kingdom	This study
B37_S55	GCF_946188755.1	176	21	Infective endocarditis	United Kingdom	This study
B38_S56	GCF_946188795.1	175	163	Infective endocarditis	United Kingdom	This study
B4_S26	GCF_946189945.1	166	182	Infective endocarditis	United Kingdom	This study
B42_S60	GCF_946188675.1	173	1	Infective endocarditis	United Kingdom	This study
B43_S61	GCF_946188595.1	172	255	Infective endocarditis	United Kingdom	This study
B44_S62	GCA_946188765.1	171	212	Infective endocarditis	United Kingdom	This study
B45_S63	GCF_946189355.1	170	202	Infective endocarditis	United Kingdom	This study
B46_S64	GCA_946188655.1	169	187	Infective endocarditis	United Kingdom	This study
B47_S65	GCF_946188745.1	168	149	Infective endocarditis	United Kingdom	This study
B49_S67	GCA_946188965.1	167	155	Infective endocarditis	United Kingdom	This study
B5_S27	GCF_946189025.1	158	235	Infective endocarditis	United Kingdom	This study
B50_S68	GCF_946188955.1	165	82	Infective endocarditis	United Kingdom	This study
B52_S70	GCA_946189865.1	164	210	Infective endocarditis	United Kingdom	This study
B54_S72	GCA_946188925.1	163	136	Infective endocarditis	United Kingdom	This study
B55_S73	GCF_946188895.1	162	50	Infective endocarditis	United Kingdom	This study
B56_S74	GCF_946188995.1	161	207	Infective endocarditis	United Kingdom	This study
B57_S75	GCA_946188985.1	160	204	Infective endocarditis	United Kingdom	This study
B59_S77	GCA_946188875.1	159	41	Infective endocarditis	United Kingdom	This study
B60_S78	GCA_946189965.1	157	227	Infective endocarditis	United Kingdom	This study
B61_S79	GCF_946188855.1	156	223	Infective endocarditis	United Kingdom	This study
B63_S81	GCF_946189015.1	155	199	Infective endocarditis	United Kingdom	This study
B65_S83	GCF_946189955.1	154	99	Infective endocarditis	United Kingdom	This study
B67_S85	GCF_946188885.1	153	191	Infective endocarditis	United Kingdom	This study
B69_S87	GCF_946188945.1	152	88	Infective endocarditis	United Kingdom	This study
B73_S91	GCF_946188935.1	151	166	Infective endocarditis	United Kingdom	This study
B74_S92	GCF_946188975.1	150	79	Infective endocarditis	United Kingdom	This study
B76_S94	GCA_946189935.1	149	228	Infective endocarditis	United Kingdom	This study
B77_S95	GCF_946189755.1	148	22	Infective endocarditis	United Kingdom	This study
B78_S96	GCF_946189875.1	147	215	Infective endocarditis	United Kingdom	This study
B79_S1	GCF_946188405.1	146	137	Infective endocarditis	United Kingdom	This study
B82_S4	GCF_946188465.1	145	221	Infective endocarditis	United Kingdom	This study
B85_S7	GCF_946189515.1	27	36	Infective endocarditis	United Kingdom	This study
B88_S10	GCF_946189785.1	144	46	Infective endocarditis	United Kingdom	This study
B89L_S11	GCF_946188455.1	143	145	Infective endocarditis	United Kingdom	This study
B9_S31	GCF_946189075.1	136	44	Infective endocarditis	United Kingdom	This study
B91_S12	GCF_946189535.1	142	54	Infective endocarditis	United Kingdom	This study
B93_S14	GCA_946189095.1	141	29	Infective endocarditis	United Kingdom	This study
B95_S16	GCA_946188475.1	140	246	Infective endocarditis	United Kingdom	This study
B96_S17	GCA_946189115.1	139	250	Infective endocarditis	United Kingdom	This study
B97_S18	GCF_946189825.1	138	242	Infective endocarditis	United Kingdom	This study
B99_S20	GCF_946189005.1	137	122	Infective endocarditis	United Kingdom	This study
GCF_000027165.1_ASM2716v1	GCF_000027165.1_ASM2716v1	135	167	Bacteremia	Germany	NCBI
GCF_000148505.1_ASM14850v1	GCF_000148505.1_ASM14850v1	134	20	Carriage	Unknown	NCBI
GCF_000148525.1_ASM14852v1	GCF_000148525.1_ASM14852v1	133	100	Carriage	Unknown	NCBI
GCF_000148545.1_ASM14854v1	GCF_000148545.1_ASM14854v1	132	123	Carriage	Unknown	NCBI
GCF_000148585.2_ASM14858v3	GCF_000148585.2_ASM14858v3	3	209	Unknown	Unknown	NCBI
GCF_000220045.1_ASM22004v2	GCF_000220045.1_ASM22004v2	131	49	Bacteremia	Unknown	NCBI
GCF_000220085.1_ASM22008v2	GCF_000220085.1_ASM22008v2	130	67	Bacteremia	Unknown	NCBI
GCF_000222785.1_ASM22278v2	GCF_000222785.1_ASM22278v2	129	9	Bacteremia	Unknown	NCBI
GCF_000257805.1_ASM25780v1	GCF_000257805.1_ASM25780v1	128	10	Bacteremia	Unknown	NCBI
GCF_000257865.1_ASM25786v1	GCF_000257865.1_ASM25786v1	127	17	Bacteremia	Unknown	NCBI
GCF_000257905.1_SmitisSK579v1.0	GCF_000257905.1_SmitisSK579v1.0	126	43	Bacteremia	Unknown	NCBI
GCF_000385815.1_ASM38581v1	GCF_000385815.1_ASM38581v1	125	28	Carriage	Russia	NCBI
GCF_000430305.1_Smit.str17_34_v1.0	GCF_000430305.1_Smit.str17_34_v1.0	124	63	Bacteremia	Russia	NCBI
GCF_000430345.1_Smit.str18_56_v1.0	GCF_000430345.1_Smit.str18_56_v1.0	123	239	Carriage	Russia	NCBI
GCF_000430365.1_Smit.str29_42_v1.0	GCF_000430365.1_Smit.str29_42_v1.0	122	251	Carriage	Russia	NCBI
GCF_000506725.1_Sm.str21_39_v1.0	GCF_000506725.1_Sm.str21_39_v1.0	121	189	Carriage	Russia	NCBI
GCF_000506765.1_Sm.str27_7_v1.0	GCF_000506765.1_Sm.str27_7_v1.0	120	157	Carriage	Russia	NCBI
GCF_000722685.1_ASM72268v1	GCF_000722685.1_ASM72268v1	119	58	Bacteremia	Denmark	NCBI
GCF_000722695.1_ASM72269v1	GCF_000722695.1_ASM72269v1	118	121	Carriage	Denmark	NCBI
GCF_000722705.1_ASM72270v1	GCF_000722705.1_ASM72270v1	117	154	Carriage	Denmark	NCBI
GCF_000722755.1_ASM72275v1	GCF_000722755.1_ASM72275v1	116	208	Bacteremia	Switzerland	NCBI
GCF_000722765.2_ASM72276v2	GCF_000722765.2_ASM72276v2	115	147	Carriage	Denmark	NCBI
GCF_000722775.1_ASM72277v1	GCF_000722775.1_ASM72277v1	114	125	Carriage	Denmark	NCBI
GCF_000722815.1_ASM72281v1	GCF_000722815.1_ASM72281v1	113	128	Carriage	Japan	NCBI
GCF_000722835.1_ASM72283v1	GCF_000722835.1_ASM72283v1	26	184	Carriage	Denmark	NCBI
GCF_000724165.1_ASM72416v1	GCF_000724165.1_ASM72416v1	112	159	Carriage	Sweden	NCBI
GCF_000960005.1_ASM96000v1	GCF_000960005.1_ASM96000v1	111	84	Carriage	United States	NCBI
GCF_000960025.1_ASM96002v1	GCF_000960025.1_ASM96002v1	26	184	Carriage	United States	NCBI
GCF_000960065.1_ASM96006v1	GCF_000960065.1_ASM96006v1	110	71	Carriage	United States	NCBI
GCF_001070035.1_ASM107003v1	GCF_001070035.1_ASM107003v1	109	226	Unknown	United States	NCBI
GCF_001070205.1_ASM107020v1	GCF_001070205.1_ASM107020v1	108	110	Unknown	United States	NCBI
GCF_001070375.1_ASM107037v1	GCF_001070375.1_ASM107037v1	107	252	Unknown	United States	NCBI
GCF_001070705.1_ASM107070v1	GCF_001070705.1_ASM107070v1	106	176	Unknown	United States	NCBI
GCF_001070985.1_ASM107098v1	GCF_001070985.1_ASM107098v1	105	256	Unknown	United States	NCBI
GCF_001074635.1_ASM107463v1	GCF_001074635.1_ASM107463v1	104	135	Unknown	United States	NCBI
GCF_001281025.1_ASM128102v1	GCF_001281025.1_ASM128102v1	103	218	Bacteremia	Korea	NCBI
GCF_001546795.1_ASM154679v1	GCF_001546795.1_ASM154679v1	102	92	Carriage	Unknown	NCBI
GCF_001560895.1_ASM156089v1	GCF_001560895.1_ASM156089v1	101	60	Bacteremia	United States	NCBI
GCF_001579045.1_ASM157904v1	GCF_001579045.1_ASM157904v1	100	116	Carriage	South Africa	NCBI
GCF_001588595.1_ASM158859v1	GCF_001588595.1_ASM158859v1	25	109	Unknown	South Africa	NCBI
GCF_001588605.1_ASM158860v1	GCF_001588605.1_ASM158860v1	25	109	Unknown	South Africa	NCBI
GCF_001588625.1_ASM158862v1	GCF_001588625.1_ASM158862v1	99	229	Unknown	United Kingdom	NCBI
GCF_002005545.1_ASM200554v1	GCF_002005545.1_ASM200554v1	98	69	Carriage	China	NCBI
GCF_002014755.1_ASM201475v1	GCF_002014755.1_ASM201475v1	3	209	Carriage	Sweden	NCBI
GCF_002014795.1_ASM201479v1	GCF_002014795.1_ASM201479v1	97	3	Bacteremia	Sweden	NCBI
GCF_002014875.1_ASM201487v1	GCF_002014875.1_ASM201487v1	96	225	Carriage	Sweden	NCBI
GCF_002096735.1_ASM209673v1	GCF_002096735.1_ASM209673v1	95	172	Infective endocarditis	Denmark	NCBI
GCF_002096755.1_ASM209675v1	GCF_002096755.1_ASM209675v1	94	19	Infective endocarditis	Denmark	NCBI
GCF_002096765.1_ASM209676v1	GCF_002096765.1_ASM209676v1	93	181	Infective endocarditis	Denmark	NCBI
GCF_002096775.1_ASM209677v1	GCF_002096775.1_ASM209677v1	92	105	Infective endocarditis	Denmark	NCBI
GCF_002096815.1_ASM209681v1	GCF_002096815.1_ASM209681v1	91	119	Infective endocarditis	Denmark	NCBI
GCF_002096835.1_ASM209683v1	GCF_002096835.1_ASM209683v1	90	168	Infective endocarditis	Denmark	NCBI
GCF_002096845.1_ASM209684v1	GCF_002096845.1_ASM209684v1	89	76	Infective endocarditis	Denmark	NCBI
GCF_002096895.1_ASM209689v1	GCF_002096895.1_ASM209689v1	88	233	Infective endocarditis	Denmark	NCBI
GCF_002096925.1_ASM209692v1	GCF_002096925.1_ASM209692v1	87	150	Infective endocarditis	Denmark	NCBI
GCF_002096935.1_ASM209693v1	GCF_002096935.1_ASM209693v1	86	171	Infective endocarditis	Denmark	NCBI
GCF_002860825.1_ASM286082v1	GCF_002860825.1_ASM286082v1	24	45	Carriage	United States	NCBI
GCF_002860865.1_ASM286086v1	GCF_002860865.1_ASM286086v1	85	188	Carriage	United States	NCBI
GCF_002860905.1_ASM286090v1	GCF_002860905.1_ASM286090v1	84	91	Carriage	United States	NCBI
GCF_002871315.1_ASM287131v1	GCF_002871315.1_ASM287131v1	24	45	Carriage	United States	NCBI
GCF_003942775.1_ASM394277v1	GCF_003942775.1_ASM394277v1	23	62	Carriage	United States	NCBI
GCF_003942885.1_ASM394288v1	GCF_003942885.1_ASM394288v1	83	224	Carriage	United States	NCBI
GCF_003942965.1_ASM394296v1	GCF_003942965.1_ASM394296v1	82	108	Carriage	United States	NCBI
GCF_003942995.1_ASM394299v1	GCF_003942995.1_ASM394299v1	81	231	Carriage	United States	NCBI
GCF_003943915.1_ASM394391v1	GCF_003943915.1_ASM394391v1	23	62	Carriage	United States	NCBI
GCF_003943965.1_ASM394396v1	GCF_003943965.1_ASM394396v1	80	56	Carriage	United States	NCBI
GCF_005144795.1_ASM514479v1	GCF_005144795.1_ASM514479v1	79	8	Unknown	United States	NCBI
GCF_005844455.1_ASM584445v1	GCF_005844455.1_ASM584445v1	78	106	Carriage	United States	NCBI
GCF_008763935.1_FS623	GCF_008763935.1_FS623	77	18	Unknown	United States	NCBI
GCF_009495695.1_ASM949569v1	GCF_009495695.1_ASM949569v1	10	83	Carriage	United States	NCBI
GCF_009495705.1_ASM949570v1	GCF_009495705.1_ASM949570v1	1	190	Carriage	United States	NCBI
GCF_009495735.1_ASM949573v1	GCF_009495735.1_ASM949573v1	1	190	Carriage	United States	NCBI
GCF_009495895.1_ASM949589v1	GCF_009495895.1_ASM949589v1	1	190	Carriage	United States	NCBI
GCF_009495955.1_ASM949595v1	GCF_009495955.1_ASM949595v1	1	190	Carriage	United States	NCBI
GCF_009496035.1_ASM949603v1	GCF_009496035.1_ASM949603v1	1	190	Carriage	United States	NCBI
GCF_009496045.1_ASM949604v1	GCF_009496045.1_ASM949604v1	1	190	Carriage	United States	NCBI
GCF_009496065.1_ASM949606v1	GCF_009496065.1_ASM949606v1	1	190	Carriage	United States	NCBI
GCF_009496075.1_ASM949607v1	GCF_009496075.1_ASM949607v1	1	190	Carriage	United States	NCBI
GCF_009496165.1_ASM949616v1	GCF_009496165.1_ASM949616v1	1	190	Carriage	United States	NCBI
GCF_009496185.1_ASM949618v1	GCF_009496185.1_ASM949618v1	10	83	Carriage	United States	NCBI
GCF_009496205.1_ASM949620v1	GCF_009496205.1_ASM949620v1	10	83	Carriage	United States	NCBI
GCF_009496295.1_ASM949629v1	GCF_009496295.1_ASM949629v1	76	114	Carriage	United States	NCBI
GCF_009496335.1_ASM949633v1	GCF_009496335.1_ASM949633v1	1	190	Carriage	United States	NCBI
GCF_009496355.1_ASM949635v1	GCF_009496355.1_ASM949635v1	1	190	Carriage	United States	NCBI
GCF_009496385.1_ASM949638v1	GCF_009496385.1_ASM949638v1	75	59	Carriage	United States	NCBI
GCF_009496395.1_ASM949639v1	GCF_009496395.1_ASM949639v1	1	190	Carriage	United States	NCBI
GCF_009496435.1_ASM949643v1	GCF_009496435.1_ASM949643v1	1	190	Carriage	United States	NCBI
GCF_009496505.1_ASM949650v1	GCF_009496505.1_ASM949650v1	1	190	Carriage	United States	NCBI
GCF_009496725.1_ASM949672v1	GCF_009496725.1_ASM949672v1	1	190	Carriage	United States	NCBI
GCF_009496735.1_ASM949673v1	GCF_009496735.1_ASM949673v1	1	190	Carriage	United States	NCBI
GCF_009496755.1_ASM949675v1	GCF_009496755.1_ASM949675v1	1	190	Carriage	United States	NCBI
GCF_009496795.1_ASM949679v1	GCF_009496795.1_ASM949679v1	1	190	Carriage	United States	NCBI
GCF_009496805.1_ASM949680v1	GCF_009496805.1_ASM949680v1	1	190	Carriage	United States	NCBI
GCF_009496815.1_ASM949681v1	GCF_009496815.1_ASM949681v1	1	190	Carriage	United States	NCBI
GCF_009496825.1_ASM949682v1	GCF_009496825.1_ASM949682v1	1	190	Carriage	United States	NCBI
GCF_009496835.1_ASM949683v1	GCF_009496835.1_ASM949683v1	1	190	Carriage	United States	NCBI
GCF_009496895.1_ASM949689v1	GCF_009496895.1_ASM949689v1	1	190	Carriage	United States	NCBI
GCF_009496905.1_ASM949690v1	GCF_009496905.1_ASM949690v1	74	57	Carriage	United States	NCBI
GCF_009730515.1_ASM973051v1	GCF_009730515.1_ASM973051v1	3	209	Carriage	United States	NCBI
GCF_900459425.1_42042_B02	GCF_900459425.1_42042_B02	3	209	Carriage	Denmark	NCBI
MSCx	GCF_905187535.1	73	132	Carriage	United Kingdom	NCBI
NM2_1	GCF_905187515.1	22	23	Carriage	United Kingdom	NCBI
NM4_2	GCF_905187545.1	22	23	Carriage	United Kingdom	NCBI
NM5_2	GCF_905187495.1	72	213	Carriage	United Kingdom	NCBI
P11_S4	GCF_946189525.1	71	254	Infective endocarditis	United Kingdom	This study
P164_S40	GCF_946189105.1	70	185	Infective endocarditis	United Kingdom	This study
P21_S10	GCF_946189045.1	69	130	Infective endocarditis	United Kingdom	This study
P28_S15	GCF_946188915.1	68	192	Infective endocarditis	United Kingdom	This study
P42_S25	GCA_946189085.1	67	90	Infective endocarditis	United Kingdom	This study
P55_S33	GCA_946189995.1	66	161	Infective endocarditis	United Kingdom	This study
P59_S35	GCA_946189495.1	65	34	Infective endocarditis	United Kingdom	This study
P60_S36	GCF_946190025.1	64	13	Infective endocarditis	United Kingdom	This study
S1071B24C1	GCA_905221505.1	9	64	Carriage	Gambia	NCBI
S1071B24C2	GCA_905221525.1	9	64	Carriage	Gambia	NCBI
S1071G24C1	GCA_905221535.1	21	134	Carriage	Gambia	NCBI
S1071G24C2	GCA_905221545.1	21	134	Carriage	Gambia	NCBI
S1071G24C3	GCA_905221005.1	9	64	Carriage	Gambia	NCBI
S1071G24C4	GCA_905221035.1	20	241	Carriage	Gambia	NCBI
S1071G24C5	GCA_905221045.1	20	241	Carriage	Gambia	NCBI
S1072B24C4	GCA_905221065.1	19	12	Carriage	Gambia	NCBI
S1072B24C5	GCA_905221055.1	19	12	Carriage	Gambia	NCBI
S1072G24C4	GCA_905221105.1	63	243	Carriage	Gambia	NCBI
S1075M24C2	GCA_905221085.1	62	153	Carriage	Gambia	NCBI
S1075M24C3	GCA_905221095.1	18	244	Carriage	Gambia	NCBI
S1075M24C5	GCA_905221075.1	18	244	Carriage	Gambia	NCBI
S1086G24C1	GCA_905221125.1	61	16	Carriage	Gambia	NCBI
S1088B24C2	GCA_905221135.1	60	72	Carriage	Gambia	NCBI
S1088M24C1	GCA_905221145.1	59	4	Carriage	Gambia	NCBI
S1091B24C4	GCA_905221155.1	58	2	Carriage	Gambia	NCBI
S1092G24C1	GCA_905221165.1	57	217	Carriage	Gambia	NCBI
S1092G24C3	GCA_905221175.1	56	193	Carriage	Gambia	NCBI
S1092G24C4	GCA_905221185.1	55	97	Carriage	Gambia	NCBI
S1093G24C1	GCA_905221195.1	29	80	Carriage	Gambia	NCBI
S1093G24C2	GCA_905221205.1	54	101	Carriage	Gambia	NCBI
S1093G24C3	GCA_905221225.1	53	77	Carriage	Gambia	NCBI
S1096G24C5	GCA_905221215.1	52	98	Carriage	Gambia	NCBI
S1096M24C3	GCA_905221245.1	51	65	Carriage	Gambia	NCBI
S1096M24C5	GCA_905221285.1	50	138	Carriage	Gambia	NCBI
U10_S50	GCF_946188615.1	48	61	Carriage	United Kingdom	NCBI
U104_S93	GCF_946188685.1	5	141	Carriage	United Kingdom	NCBI
U105_S94	GCA_946188575.1	5	141	Carriage	United Kingdom	NCBI
U109_S95	GCF_946188695.1	49	151	Carriage	United Kingdom	NCBI
U114_S96	GCA_946188415.1	47	203	Carriage	United Kingdom	NCBI
U117_S1	GCF_946188585.1	46	104	Carriage	United Kingdom	NCBI
U12_S51	GCA_946224775.1	8	197	Carriage	United Kingdom	NCBI
U122_S2	GCF_946189145.1	45	42	Carriage	United Kingdom	NCBI
U123_S3	GCF_946190065.1	44	133	Carriage	United Kingdom	NCBI
U126_S5	GCF_946190085.1	43	232	Carriage	United Kingdom	NCBI
U13_S52	GCF_946190075.1	41	234	Carriage	United Kingdom	NCBI
U131_S7	GCF_946190095.1	42	179	Carriage	United Kingdom	NCBI
U134_S8	GCF_946190055.1	4	216	Carriage	United Kingdom	NCBI
U135_S9	GCF_946190045.1	4	216	Carriage	United Kingdom	NCBI
U14_S53	GCA_946190385.1	17	126	Carriage	United Kingdom	NCBI
U143_S13	GCF_946190395.1	40	175	Carriage	United Kingdom	NCBI
U144_S14	GCF_946190245.1	39	47	Carriage	United Kingdom	NCBI
U148_S15	GCF_946190215.1	4	216	Carriage	United Kingdom	NCBI
U15_S54	GCF_946190375.1	17	126	Carriage	United Kingdom	NCBI
U16_S55	GCA_946190205.1	8	197	Carriage	United Kingdom	NCBI
U164_S21	GCF_946190365.1	38	111	Carriage	United Kingdom	NCBI
U165-2_S22	GCF_946186005.1	37	39	Carriage	United Kingdom	NCBI
U23_S57	GCA_946190355.1	2	89	Carriage	United Kingdom	NCBI
U24_S58	GCA_946190345.1	2	89	Carriage	United Kingdom	NCBI
U25_S59	GCA_946224995.1	2	89	Carriage	United Kingdom	NCBI
U28_S60	GCA_946225005.1	2	89	Carriage	United Kingdom	NCBI
U32_S62	GCA_946224725.1	16	53	Carriage	United Kingdom	NCBI
U35_S65	GCA_946224685.1	16	53	Carriage	United Kingdom	NCBI
U36_S66	GCA_946224705.1	15	139	Carriage	United Kingdom	NCBI
U39_S69	GCA_946224645.1	15	139	Carriage	United Kingdom	NCBI
U40_S70	GCF_946190305.1	36	214	Carriage	United Kingdom	NCBI
U48_S72	GCA_946224865.1	11	27	Carriage	United Kingdom	NCBI
U52_S74	GCF_946190225.1	11	27	Carriage	United Kingdom	NCBI
U54_S75	GCF_946190185.1	35	248	Carriage	United Kingdom	NCBI
U56_S76	GCF_946190325.1	7	247	Carriage	United Kingdom	NCBI
U57_S77	GCF_946190235.1	7	247	Carriage	United Kingdom	NCBI
U61_S78	GCF_946190115.1	34	219	Carriage	United Kingdom	NCBI
U63_S79	GCA_946190175.1	7	247	Carriage	United Kingdom	NCBI
U65_S81	GCA_946190125.1	33	118	Carriage	United Kingdom	NCBI
U67_S83	GCF_946190165.1	32	249	Carriage	United Kingdom	NCBI
U8_S49	GCA_946190315.1	8	197	Carriage	United Kingdom	NCBI
U92_S86	GCF_946190145.1	31	52	Carriage	United Kingdom	NCBI
U98_S90	GCF_946190155.1	14	112	Carriage	United Kingdom	NCBI
U99_S91	GCA_946190155.1	14	112	Carriage	United Kingdom	NCBI
WTCHG_774611_72895361	GCF_946190255.1	13	198	Carriage	Malawi	NCBI
WTCHG_774611_72965368	GCF_946190195.1	30	148	Carriage	Malawi	NCBI
WTCHG_774611_73005372	GCF_946190135.1	6	113	Carriage	Malawi	NCBI
WTCHG_774611_73015373	GCF_946190275.1	13	198	Carriage	Malawi	NCBI
WTCHG_774611_73075379	GCF_946190295.1	5	142	Carriage	Malawi	NCBI
WTCHG_774611_73095381	GCF_946190335.1	6	113	Carriage	Malawi	NCBI
WTCHG_774611_73775353	GCF_946190285.1	12	117	Carriage	Malawi	NCBI
WTCHG_774611_73825358	GCF_946190255.1	12	117	Carriage	Malawi	NCBI
WTCHG_774611_73845360	GCF_946185975.1	6	113	Carriage	Malawi	NCBI

## Sheet: Data 5
Isolate	Sequence type	Global sequence cluster	Penicillin susceptibility
13P_S6	257	257	Non-susceptible
52P_S30	246	246	Non-susceptible
61P_S37	245	245	Non-susceptible
B106_S27	234	234	Non-susceptible
B119_S40	224	224	Non-susceptible
B124_S44	221	221	Non-susceptible
B134_S53	213	213	Non-susceptible
B139_S57	211	211	Non-susceptible
B151_S69	28	28	Non-susceptible
B156_S74	202	202	Non-susceptible
B158_S76	200	200	Non-susceptible
B159_S77	199	199	Non-susceptible
B162_S80	197	197	Non-susceptible
B167_S85	193	193	Non-susceptible
B169_S87	191	191	Non-susceptible
B173_S91	188	188	Non-susceptible
B31_S49	179	179	Non-susceptible
B47_S65	168	168	Non-susceptible
B49_S67	167	167	Non-susceptible
B60_S78	157	157	Non-susceptible
B63_S81	155	155	Non-susceptible
B65_S83	154	154	Non-susceptible
B79_S1	146	146	Non-susceptible
B82_S4	145	145	Non-susceptible
B89L_S11	143	143	Non-susceptible
B91_S12	142	142	Non-susceptible
B95_S16	140	140	Non-susceptible
P164_S40	70	70	Non-susceptible
P21_S10	69	69	Non-susceptible
P42_S25	67	67	Non-susceptible
12P_S5	258	258	Susceptible
14P_S7	256	256	Susceptible
1P_S1	254	254	Susceptible
22P_S11	253	253	Susceptible
27P_S14	252	252	Susceptible
32P_S19	251	251	Susceptible
38P_S23	250	250	Susceptible
3P_S2	249	249	Susceptible
44P_S26	248	248	Susceptible
50P_S29	247	247	Susceptible
62P_S38	244	244	Susceptible
7P_S3	242	242	Susceptible
B1_S23	185	185	Susceptible
B10_S32	232	232	Susceptible
B100_S21	241	241	Susceptible
B102_S23	236	236	Susceptible
B105_S26	235	235	Susceptible
B107_S28	233	233	Susceptible
B110_S31	231	231	Susceptible
B111_S32	230	230	Susceptible
B112_S33	229	229	Susceptible
B113_S34	228	228	Susceptible
B114_S35	227	227	Susceptible
B116_S37	226	226	Susceptible
B117_S38	225	225	Susceptible
B12_S34	216	216	Susceptible
B121_S42	223	223	Susceptible
B122_S43	222	222	Susceptible
B125_S45	220	220	Susceptible
B126_S46	219	219	Susceptible
B128_S47	218	218	Susceptible
B129_S48	217	217	Susceptible
B13_S35	210	210	Susceptible
B132_S51	215	215	Susceptible
B133-2_S52	214	214	Susceptible
B137_S55	212	212	Susceptible
B14_S36	205	205	Susceptible
B140_S58	209	209	Susceptible
B146_S64	208	208	Susceptible
B147_S65	207	207	Susceptible
B148_S66	206	206	Susceptible
B15_S37	198	198	Susceptible
B153_S71	204	204	Susceptible
B155_S73	203	203	Susceptible
B157_S75	201	201	Susceptible
B161_S79	27	27	Susceptible
B163_S81	196	196	Susceptible
B165_S83	195	195	Susceptible
B166_S84	194	194	Susceptible
B168_S86	192	192	Susceptible
B170_S88	190	190	Susceptible
B172_S90	189	189	Susceptible
B174_S92	187	187	Susceptible
B176_S94	28	28	Susceptible
B19_S40	186	186	Susceptible
B20_S41	184	184	Susceptible
B21_S42	183	183	Susceptible
B22_S43	182	182	Susceptible
B26_S45	181	181	Susceptible
B3_S25	174	174	Susceptible
B30_S48	180	180	Susceptible
B33_S51	178	178	Susceptible
B34_S52	177	177	Susceptible
B37_S55	176	176	Susceptible
B38_S56	175	175	Susceptible
B4_S26	166	166	Susceptible
B42_S60	173	173	Susceptible
B43_S61	172	172	Susceptible
B44_S62	171	171	Susceptible
B45_S63	170	170	Susceptible
B46_S64	169	169	Susceptible
B5_S27	158	158	Susceptible
B50_S68	165	165	Susceptible
B52_S70	164	164	Susceptible
B54_S72	163	163	Susceptible
B55_S73	162	162	Susceptible
B56_S74	161	161	Susceptible
B57_S75	160	160	Susceptible
B59_S77	159	159	Susceptible
B61_S79	156	156	Susceptible
B67_S85	153	153	Susceptible
B69_S87	152	152	Susceptible
B73_S91	151	151	Susceptible
B74_S92	150	150	Susceptible
B76_S94	149	149	Susceptible
B77_S95	148	148	Susceptible
B78_S96	147	147	Susceptible
B85_S7	27	27	Susceptible
B88_S10	144	144	Susceptible
B9_S31	136	136	Susceptible
B93_S14	141	141	Susceptible
B96_S17	139	139	Susceptible
B97_S18	138	138	Susceptible
B99_S20	137	137	Susceptible
P11_S4	71	71	Susceptible
P28_S15	68	68	Susceptible
P55_S33	66	66	Susceptible
P59_S35	65	65	Susceptible
P60_S36	64	64	Susceptible

## Sheet: Data 6
	Virulence genes
Isolate	cps4A	cps4B	cps4C	cps4D	cps4E	cps4F	cps4I	cps4J	cps4K	cps4L	hasC	lytA	lytC	nanA	nanB	pavA	pce	pfbA	pilT	ply	plbA	plbB	psaA
B1015H24C1	.	.	.	.	.	.	.	.	.	.	95.41	.	100	.	.	100	100	.	.	.	.	.	100
B26_S45	81.19	.	.	.	.	.	.	.	.	.	95.74	.	99.8	.	.	100	99.95	79.17	.	.	.	.	100
GCF_002005545.1_ASM200554v1	99.45	.	.	.	.	.	.	.	.	.	95.41	.	100	.	.	100	98.99	.	.	.	.	.	100
B82_S4	.	100	99.86	98.83	.	.	.	.	.	.	94.75	99.37	100	.	.	100	99.79	79.17	.	100	.	.	100
B159_S77	.	.	.	.	.	.	.	.	.	.	95.52	96.97		.	100	100	99.73	.	.	.	.	.	100
GCF_000220085.1_ASM22008v2	.	.	.	.	.	.	.	.	.	.	95.52	99.27	85.79	.	100	99.94	100	.	.	100	.	.	100
B1015H24C4	.	.	.	.	.	.	.	.	.	.	95.52	98.22	100	.	.	100	100	.	.	.	.	.	100
WTCHG_774611_72965368	.	.	.	.	.	.	.	.	.	.	95.41	98.12	100	.	.	99.94	100	.	.	.	.	.	100
GCF_000722765.2_ASM72276v2	.	.	.	.	.	.	.	.	.	.	94.86	.		.	.	99.94	99.95	.	.	.	.	.	100
GCF_002014795.1_ASM201479v1	.	.	.	.	.	.	.	.	.	.	94.86			.	.	99.94	99.95	.	.	.	.	.	100
B69_S87	.	.	.	.	.	.	.	.	.	.	94.86	92.69	100	.	.	100	99.73		.	.	.	.	100
U35_S65	99.38	100	97.11	.	94.34	96.34	.	100	100	100	95.3	97.39	100	.	.	100	99.84	79.17	.	.	.	.	100
U32_S62	99.38	100	97.11	.	94.34	96.34	.	100	100	100	95.3	97.39	100	.	.	100	99.84	79.17	.	.	.	.	100
B163_S81	.	.	.	.	.	.	.	.	.	.	95.41	.	100	.	100	100	100	79.17	.	.	.	.	100
B4_S26	81.05	.	.	.	.	.	.	.	.	.	95.52	.	84.93	.	.	99.58	99.79	.	.	.	.	.	100
B37_S55	.	.	.	.	.	.	.	.	.	.	95.41	.	100	.	.	99.94	99.84	.	.	.	.	.	100
U122_S2	99.79	100	100	98.83	99.37	96.26	.	100	100	100	95.41	96.97	100	.	100	99.94	99.95	.	.	.	.	.	100
B34_S52	99.79	100	100	98.83	97.01	96.26	.	100	100	100	95.52	.	100	.	100	100	100	.	.	.	.	.	100
U109_S95	99.79	100	100	98.83	97.01	96.26	.	100	100	100	95.52	.	100	.	100	100	100	.	.	.	.	.	100
WTCHG_774611_73775353	.	.	.	.	.	.	.	.	.	.	95.74	.	84.99	.	.	100	99.95	79.17	.	.	.	.	100
WTCHG_774611_73825358	.	.	.	.	.	.	.	.	.	.	95.74	.	84.99	.	.	100	99.95	79.17	.	.	.	.	100
B113_S34	.	.	.	.	.	.	.	.	.	.	95.52	.		.	.	99.94	99.95	.	.	.	.	.	100
B60_S78	.	.	.	.	.	.	.	.	.	.	95.74	.	85.26	.	.	99.94	99.95	.	.	.	.	.	100
P55_S33	81.05	.	.	.	.	.	.	.	.	.	95.52	.		.	.	99.94	99.95	.	.	.	.	.	100
S1096M24C5	.	.	.	.	.	.	.	.	.	.	95.52	.	85.33	.	.	100	.	.	.	.	.	.	100
U10_S50	81.05	.	.	.	.	.	.	.	.	.	95.52	.		.	.	99.94	99.95	79.17	.	.	.	.	100
U13_S52	81.05	.	.	.	.	.	.	.	.	.	95.74	92.69	84.99	.	.	99.94	99.95	.	.	.	.	.	100
Smit.str29_42_v1.0	.	.	.	.	.	.	.	.	.	.	94.75	92.37	84.99	.	.	100		.	.	.	.	.	100
B158_S76	.	.	.	.	.	.	.	.	.	.	95.52	97.07;98.22	100	.	.	100	99.79	.	.	100	.	.	100
GCF_002096845.1_ASM209684v1	.	.	.	.	.	.	.	.	.	.	95.85	.	100	.	.	100	99.79	.	.	.	.	.	100
GCF_000722705.1_ASM72270v1	.	.	.	.	.	.	.	.	.	.	95.52	.	100	.	100	99.58	100	.	.	.	.	.	100
S1088B24C2	.	.	.	.	.	.	.	.	.	.	95.85	.	100	.	.	99.58	100	.	.	.	.	.	100
B1015B24C5	.	.	.	.	.	.	.	.	.	.	95.85	.	99.67	.	.	100	100	.	.	.	.	.	100
S1093G24C1	.	.	.	.	.	.	.	.	.	.	95.85	.	99.67	.	.	100	100	.	.	.	.	.	100
Smit.str17_34_v1.0	99.45	100	.	.	96.54	96.34	.	100	100	100	95.52	.		.	.	99.94	99.95	.	.	.	.	.	100
B106_S27	.	.	.	.	.	.	.	.	.	.	94.75	92.16;99.37	85.79	.	100	99.94	99.84	.	.	100	.	.	100
B91_S12	.	.	.	.	.	.	.	.	.	.	95.52	22.68;22.68;98.33;40.86;30.20;30.09	98.01	.	.	100	100	.	.	100	.	.	100
GCF_009496295.1_ASM949629v1	.	.	.	.	.	.	.	.	.	.	95.19		100	.	100	100	99.84	79.17	.	.	.	.	100
WTCHG_774611_73005372	.	.	.	.	.	.	.	.	.	.	95.52	.	100	.	.	99.94	99.84	79.17	.	.	.	.	100
WTCHG_774611_73095381	.	.	.	.	.	.	.	.	.	.	95.52	.	100	.	.	99.94	99.84	79.17	.	.	.	.	100
WTCHG_774611_73845360	.	.	.	.	.	.	.	.	.	.	95.52	.	100	.	.	99.94	99.84	79.17	.	.	.	.	100
B89L_S11	.	.	.	.	.	.	.	.	.	.	95.19;23.28	98.75	100	.	100	100.00;14.56	99.84	79.17	.	.	.	.	100
103U_S92	.	.	.	.	.	.	.	.	.	.	95.85	38.87;25.29;25.29;42.74;44.31;38.87	100	.	.	100	99.84	79.17	.	.	.	.	100
U104_S93	.	.	.	.	.	.	.	.	.	.	95.85	44.31;91.64	100	.	.	100	99.84	79.17	.	.	.	.	100
WTCHG_774611_73075379	.	.	.	.	.	.	.	.	.	.	95.85	44.31;91.64	100	.	.	100	99.84	79.17	.	.	.	.	100
U105_S94	.	.	.	.	.	.	.	.	.	.	95.85	44.31;91.64	100	.	.	100	99.84	79.17	.	.	.	.	100
B129_S48	.	.	.	.	.	.	.	.	.	.	94.86	.	100	.	.	99.94	99.95	79.17	.	.	.	.	100
U165-2_S22	.	.	.	.	.	.	.	.	.	.	95.85	.	100	.	100	100	99.95	79.17	.	.	.	.	100
B162_S80	.	.	.	.	.	.	.	.	.	.	95.19	.	100	.	100	100	100	79.17	.	.	.	.	100
GCF_002096775.1_ASM209677v1	.	.	.	.	.	.	.	.	.	.	95.19	.	100	.	100	100	100	79.17	.	.	.	.	100
B14_S36	.	.	.	.	.	.	.	.	.	.	95.19	.	99.67		.	100	100	79.17	.	.	.	.	100
GCF_000148505.1_ASM14850v1	.	.	.	.	.	.	.	.	.	.	95.19	.	100	.	.	100	100	79.17	.	.	.	.	100
GCF_003942775.1_ASM394277v1	.	.	.	.	.	.	.	.	.	.	95.63		100	.	.	100	100	79.17	.	.	.	.	100
GCF_003943915.1_ASM394391v1	.	.	.	.	.	.	.	.	.	.	95.63		100	.	.	100	100	79.17	.	.	.	.	100
P28_S15	.	.	.	.	.	.	.	.	.	.	95.52	.	100	.	.	100	100	79.17	.	.	.	.	100
52P_S30	.	.	.	.	.	.	.	.	.	.	95.19	.	100	.	.	100	100	79.17	.	.	.	.	100
B31_S49	.	.	.	.	.	.	.	.	.	.	95.19		100	.	100	99.94	99.84	.	.	.	.	.	100
GCF_003942885.1_ASM394288v1	.	.	.	.	.	.	.	.	.	.	94.86	.	100	.	100	99.94	99.84	.	.	.	.	.	100
B21_S42	81.19	.	.	.	.	.	.	.	.	.	95.85		100	.	.	99.94	99.84	.	.	.	.	.	100
GCF_000960005.1_ASM96000v1	.	.	.	.	.	.	.	.	.	.	95.85	.	100	.	.	99.94	99.84	.	.	.	.	.	100
22P_S11	.	.	.	.	.	.	.	.	.	.	95.85	44.31;98.22	100	.		100	99.84	.	.	.	.	.	100
B173_S91	.	.	.	.	.	.	.	.	.	.	94.86	.	100	.	100	100	99.84	.	.	.	.	.	100
P60_S36	.	.	.	.	.	.	.	.	.	.	95.85	.	100	.	100	100	99.84	.	.	.	.	.	100
P59_S35	.	.	.	.	.	.	.	.	.	.	95.19	.	100	.	.	100	99.95	.	.	.	.	.	100
B42_S60	.	.	.	.	.	.	.	.	.	.	95.19	.	100	.	100	99.94	100	.	.	.	.	.	100
B161_S79	.	.	.	.	.	.	.	.	.	.	94.86	92.27;45.35	100	.	100	99.94	100	.	.	.	.	.	100
B85_S7	.	.	.	.	.	.	.	.	.	.	94.86	.	100	.	.	99.94	100	.	.	.	.	.	100
B93_S14	.	.	.	.	.	.	.	.	.	.	95.19	.	100	.	7.40;100.00	99.94	100	.	.	.	.	.	100
B44_S62	.	.	.	.	.	.	.	.	.	.	94.86	.	100	.	.	100	100	.	.	.	.	.	100
B151_S69	.	.	.	.	.	.	.	.	.	.	94.86	.	100	.	.	100	99.84	79.17	.	.	.	.	100
B176_S94	.	.	.	.	.	.	.	.	.	.	94.86	.	100	.	.	100	99.84	79.17	.	.	.	.	100
GCF_003942995.1_ASM394299v1	.	.	.	.	.	.	.	.	.	.	95.85	.	100	.	100	99.94	99.84	79.17	.	.	.	.	100
B54_S72	.	.	.	.	.	.	.	.	.	.	95.85	.	100	.	.	100	99.84	79.17	.	.	.	.	100
B165_S83	.	.	.	.	.	.	.	.	.	.	95.19	.	100	.	100	100	99.84	.	.	.	.	.	100
B30_S48	.	.	.	.	.	.	.	.	.	.	94.86		100	.	100	100	99.84	.	.	.	.	.	100
GCF_001281025.1_ASM128102v1	.	.	.	.	.	.	.	.	.	.	95.85	.	100	.	.	100	99.84	.	.	.	.	.	100
GCF_001588625.1_ASM158862v1		.	.	.	.	.	.	.	.	.	95.19	.		.	.	99.94	99.95	.	.	.	.	.	100
B134_S53	.	.	.	.	.	.	.	.	.	.	95.19	.	100	.	100	99.94	100	.	.	.	.	.	100
U48_S72	.	.	.	.	.	.	.	.	.	.	95.41	94.78		.	.	99.94	.	99.26	.	.	.	.	100
U52_S74	.	.	.	.	.	.	.	.	.	.	95.41	94.78		.	.	99.94	.	99.26	.	.	.	.	100
128U_S6	.	.	.	.	.	.	.	.	.	.	95.41	94.78		.	.	99.94	.	99.26	.	.	.	.	100
GCF_001579045.1_ASM157904v1	.	.	.	.	.	.	.	.	.	.	95.52	98.75;98.33	98.01	.	100	99.88	100	.	.	100	.	.	100
GCF_000027165.1_ASM2716v1	.	.	.	.	.	.	.	.	.	.	95.08	92.27	84.99	.	.	100	99.95	.	.	.	.	.	100
U25_S59	87.14	100	.	100	.	.	.	.	.	.	95.74	.	.	81.4	.	100	.	.	.	.	.	.	98.49
B52_S70	99.79	100	99.57	100	.	.	.	.	.	.	95.74		.	81.21	.	100	.	.	.	.	.	.	99.68
GCF_001588595.1_ASM158859v1	80.91	100	.	99.85	.	.	.	.	.	.	95.08	.	.	81.37	.	99.88	.	.	.	.	.	.	99.68
GCF_000385815.1_ASM38581v1	.	.	.	.	.	.	.	.	.	.	95.52	.	84.99	.	.	100	.	.	.	.	.	.	99.78
B76_S94	81.05	.	.	.	.	.	.	.	.	.	95.74	99.37	84.99	.	.	100	99.79	79.12	.	100	.	.	100
B38_S56	99.65	100	100	96.05	.	.	.	.	.	.	95.3	99.37	100	.	.	100	99.79	79.17	.	100	.	.	100
B139_S57	99.52	100	100	91.08	99.06	96.26	.	92.52	99.35	100	95.41	99.37	100	.	.	100	99.79	79.17	.	100	.	.	100
B169_S87	.	100	99.86	99.85	.	.	.	.	.	.	94.75	99.37	100	.	100	100	99.79	79.17	.	100	.	.	100
B65_S83	99.72	100	97.26	.	.	.	.	.	.	.	95.41	99.37	100	.	100	100	99.79	79.17	.	100	.	.	100
GCF_000148545.1_ASM14854v1	99.45	.	.	98.54	.	.	.	.	.	.	95.74	99.37	100	.	.	100	99.79	79.17	.	100	.	.	100
P42_S25	99.45	.	.	99.71	.	.	.	.	.	.	95.41	99.37	99.93	.	.	100	99.79	.	.	100	.	.	100
GCF_000148525.1_ASM14852v1	99.72	100	97.26	.	.	.	.	.	.	.	95.41	99.37	100	.	100	100	99.79	.	.	100	.	.	100
B55_S73	.	.	.	.	.	.	.	.	.	.	95.74	99.27			.	100	99.79	.	.	100	.	.	100
GCF_008763935.1_FS623	.	.	.	.	.	.	.	.	.	.	95.52	.	100	.	100	99.94	99.84	79.17	99.23	.	.	.	100
P11_S4	99.59	100	99.57	100	.	.	.	.	.	.	95.63	.	85.13	.	100	99.94	99.84		.	.	.	.	100
GCF_000257865.1_ASM25786v1	99.79	100	100	99.85	100	96.26	.	100	100	100	95.74	.	100	.	100	100	98.51	79.17	.	.	.	.	100
Sm.str21_39_v1.0	99.65	100	100	99.56	99.06	96.26	.	92.52	99.35	100	95.52	.	100	.	100	100	99.79	79.17	.	.	.	.	100
GCF_000220045.1_ASM22004v2	.	.	.	.	.	.	.	.	.	.	95.52	.		.	100	100	99.84	79.17	.	.	.	.	100
B15_S37	.	.	.	.	.	.	.	.	.	.	95.74	.	99.73	.	7.40;100.00	100	99.84	79.17	.	.	.	.	100
B43_S61	99.59	100	99.57	100	.	.	.	.	.	.	95.74	.	85.13	.	.	100	99.95	79.17	.	.	.	.	100
B73_S91	.	.	.	.	.	.	.	.	.	.	94.86	.	100	.	.	99.94	100	79.17	.	.	.	.	100
S1096M24C3	.	.	.	.	.	.	.	.	.	.	95.74	.	100	.	.	100	100	79.17	.	.	.	.	100
7P_S3	81.19	.	.	.	.	.	.	.	.	.	94.86	.	100	.	.	100	100	79.17	.	.	.	.	100
B133-2_S52	.	.	.	.	.	.	.	.	.	.	94.86	.	100	.	100	99.94	100	79.17	.	.	.	.	100
B172_S90	81.19	.	.	.	.	.	.	.	.	.	95.52		100	.	100	100	100	79.17	.	.	.	.	100
B50_S68	.	.	.	.	.	.	.	.	.	.	94.86	.	100	.	100	100	100	79.17	.	.	.	.	100
GCF_002860825.1_ASM286082v1	99.65	100	100	99.85	.	.	.	.	.	.	95.41	.		.	100	100	.	79.17	.	.	.	.	100
GCF_002871315.1_ASM287131v1	99.65	100	100	99.85	.	.	.	.	.	.	95.41	.		.	100	100	.	79.17	.	.	.	.	100
GCF_001070205.1_ASM107020v1	.	100	.	99.85	.	.	.	.	.	.	95.74	.	.		.	100	.	79.17	.	.	.	.	100
U164_S21	99.79	100	.	99.85	.	.	.	.	.	.	95.08	.	.	80.21	.	100	.	79.17	.	.	.	.	100
B95_S16	99.79	100	.	99.85	.	.	.	.	.	.	95.74	.	.	81.5	.	100	.	79.17	.	.	.	.	100
B174_S92	81.19	.	.	.	.	.	.	.	.	.	94.86	.			100	99.94	.	79.17	.	.	.	.	100
U98_S90	99.79	100	99.57	100	.	.	.	.	.	.	95.08	.	.	81.18	.	100	.	79.17	.	.	.	.	100
U99_S91	99.79	100	99.57	100	.	.	.	.	.	.	95.08	.	.	81.18	.	100	.	79.17	.	.	.	.	100
GCF_001546795.1_ASM154679v1	99.52	100	100	99.85	.	.	.	.	.	.	95.52	.		.	.	100	.	79.17	.	.	.	.	100
B61_S79	80.98	.	.	.	.	.	.	.	.	.	95.74	.		.	.	100	.	79.17	.	.	.	.	100
B170_S88	99.52	100	100	99.56	99.06	96.26	.	92.52	99.35	100	95.19	.		.	.	100	.	82.27	.	.	.	.	100
GCF_000257805.1_ASM25780v1	99.65	100	97.55	.	94.18	96.34	.	100	100	100	95.3	.	100	.	100	99.94	99.2	.	.	.	.	.	100
GCF_000222785.1_ASM22278v2	99.65	100	97.26	.	.	.	.	.	.	.	95.3	.	100	.	.	99.94	99.68	.	.	.	.	.	100
B126_S46	81.19	.	.	.	.	.	.	.	.	.	95.63	99.37	84.93	.	.	100	99.68	.	.	.	.	.	100
S1072G24C4	.	.	.	.	.	.	.	.	.	.	95.52	.	100	.	.	100	99.73	.	.	.	.	.	100
B77_S95	99.65	100	100	99.85	.	.	.	.	.	.	95.41	92.69;96.87	100	.	100	99.94	99.79	.	.	.	.	.	100
44P_S26	.	.	.	.	.	.	.	.	.	.	95.52	.	84.99	.	.	99.94	99.79	.	.	.	.	.	100
B167_S85	99.79	100	100	98.83	97.01	96.26	.	99.91	100	100	95.41	.	100	.	100	100	99.79	.	.	.	.	.	100
B132_S51	81.19	.	.	.	.	.	.	.	.		95.41	.	100	.	.	100	99.79	.	.	.	.	.	100
S1093G24C3	99.45	.	.	.	.	.	.	.	.	.	95.74	.		.	.	99.94	99.79	.	.	.	.	.	100
B99_S20	99.65	100	100	99.85	97.01	96.26	.	100	100	100	95.41	.	100	.	100	99.94	99.84	.	.	.	.	.	100
B114_S35	.	.	.	.	.	.	.	.	.	.	95.85	.	100	.	100	99.94	99.84	.	.	.	.	.	100
B128_S47	99.79	100	99.86	99.85	.	.	.	.	.	.	95.52	.	100	.	100	99.94	99.84	.	.	.	.	.	100
U61_S78	99.79	100	100	99.85	100	96.26	.	100	100	100	94.75	.	100	.	.	99.94	99.84	.	.	.	.	.	100
B140_S58	99.65	100	100	99.85	99.37	96.26	.	100	100	100	95.41	.	100	.	100	100	99.84	.	.	.	.	.	100
B112_S33	99.52	100	99.28	98.83	99.37	96.26	.	100	100	100	95.52	.	100	.	100	100	99.84	.	.	.	.	.	100
GCF_002096735.1_ASM209673v1	.	.	.	.	.	.	.	.	.	.	95.19	.		.	.	100	99.84	.	.	.	.	.	100
MSCx	.	.	.	.	.	.	.	.	.	.	95.52	.		.	.	100	99.84	.	.	.	.	.	100
GCF_009496385.1_ASM949638v1	99.65	100	97.26	.	.	.	.	.	.	.	95.41			.	.	100	99.95	.	.	.	.	.	100
B33_S51	.	.	.	.	.	.	.	.	.	.	94.86	.	100	.	.	100	99.95	.	.	.	.	.	100
B5_S27	.	.	.	.	.	.	.	.	.	.	94.86	.	85.52	.	.	99.94	99.95	.	.	.	.	.	100
U54_S75	80.98	.	.	.	.	.	.	.	.	.	94.97	.	84.93	.	100	100	99.95	.	.	.	.	.	100
NM5_2	.	.	.	.	.	.	.	.	.	.	95.74	.	84.99	.	.	100	99.95	.	.	.	.	.	100
50P_S29	.	.	.	.	.	.	.	.	.	.	95.74	.		.	.	99.94	99.95	.	.	.	.	.	100
B122_S43	.	.	.	.	.	.	.	.	.	.	95.52	.	84.99	.		99.94	99.95	.	.	.	.	.	100
GCF_001070705.1_ASM107070v1	81.19	.	.	.	.	.	.	.	.	.	95.52	99.37	84.93	.	.	99.94	99.95	.	.	.	.	.	100
B13_S35	.	.	.	.	.	.	.	.	.	.	95.52	92.58	84.99	.	.	99.94	99.95	.	.	.	.	.	100
U131_S7	99.45	.	.	.	.	.	.	.	.	.	95.41	.		.	.	99.94	99.95	.	.	.	.	.	100
B153_S71	81.19	.	.	.	.	.	.	.	.	.	95.52	.		.	.	99.94	99.95	.	.	.	.	.	100
B110_S31	.	.	.	.	.	.	.	.	.	.	95.52	.		.	.	99.94	99.95	.	.	.	.	.	100
GCF_001070375.1_ASM107037v1	.	.	.	.	.	.	.	.	.	.	95.74	.		.		100	99.95	.	.	.	.	.	100
B116_S37	81.05	.	.	.	.	.	.	.	.	.	95.52	92.69		.	100	100	99.95	.	.	.	.	.	100
B156_S74	.	.	.	.	.	.	.	.	.	.	95.74	.		.	100	100	99.95	.	.	.	.	.	100
GCF_001070985.1_ASM107098v1	.	.	.	.	.	.	.	.	.	.	95.74	.	84.93	.	.	100	99.95	.	.	.	.	.	100
GCF_000148585.2_ASM14858v3	.	.	.	.	.	.	.	.	.	.	95.74	.	84.99	.	.	100	99.95	.	.	.	.	.	100
GCF_009730515.1_ASM973051v1	.	.	.	.	.	.	.	.	.	.	95.74	.	84.99	.	.	100	99.95	.	.	.	.	.	100
GCF_900459425.1_42042_B02	.	.	.	.	.	.	.	.	.	.	95.74	.	84.99	.	.	100	99.95	.	.	.	.	.	100
S1088M24C1	81.19	.	.	.	.	.	.	.	.	.	95.08	99.48	100	.	.	100	99.95	.	.	.	.	.	100
B1015H24C3	99.38	.	.	.	.	.	.	.	.	.	95.3	92.37;92.16	100	.	.	100	99.95	.	.	.	.	.	100
S1093G24C2	.	.	.	.	.	.	.	.	.	.	95.08	.		.	.	100	99.95	.	.	.	.	.	100
B57_S75	81.19	.	.	.	.	.	.	.	.	.	95.52	.		.	.	100	99.95	.	.	.	.	.	100
U12_S51	.	.	.	.	.	.	.	.	.	.	95.52	.		.	.	100	99.95	.	.	.	.	.	100
U8_S49	.	.	.	.	.	.	.	.	.	.	95.52	.		.	.	100	99.95	.	.	.	.	.	100
GCF_002014755.1_ASM201475v1	.	.	.	.	.	.	.	.	.	.	95.74	.		.	.	100	99.95	.	.	.	.	.	100
B12_S34	.	.	.	.	.	.	.	.	.	.	95.52	92.79		.	.	100	99.95	.	.	.	.	.	100
B56_S74	.	.	.	.	.	.	.	.	.	.	95.19	.		.	.	100	99.95	.	.	.	.	.	100
GCF_001070035.1_ASM107003v1	.	.	.	.	.	.	.	.	.	.	94.86	.		.	.	100	99.95	.	.	.	.	.	100
B46_S64	.	.	.	.	.	.	.	.	.	.	95.74	.		.	.	100	99.95	.	.	.	.	.	100
GCF_000724165.1_ASM72416v1	.	.	.	.	.	.	.	.	.	.	94.86	.		.	.	100	99.95	.	.	.	.	.	100
32P_S19	.	.	.	.	.	.	.	.	.	.	95.52	98.33		.	.	100	99.95	.	.	.	.	.	100
12P_S5	.	.	.	.	.	.	.	.	.	.	95.74	.		.	.	100	99.95	.	.	.	.	.	100
161U_S19	81.19	.	.	.	.	.	.	.	.	.	95.52	91.64	100	.	.	99.94	99.95	.	.	.	.	.	100
B47_S65	80.98	.	.	.	.	.	.	.	.	.	94.86	.		.	.	100	99.95	.	.	.	.	.	100
U114_S96	.	.	.	.	.	.	.	.	.	.	94.75	.		.	.	100	99.95	.	.	.	.	.	100
GCF_002096765.1_ASM209676v1	.	.	.	.	.	.	.	.	.	.	94.86	92.37;92.37		.		100	99.95	.	.	.	.	.	100
GCF_002014875.1_ASM201487v1	.	.	.	.	.	.	.	.	.	.	95.74	.	84.99	.		100	99.95	.	.	.	.	.	100
Sm.str27_7_v1.0	.	.	.	.	.	.	.	.	.	.	95.74	99.27		.	.	100	99.95	.	.	.	.	.	100
GCF_002096835.1_ASM209683v1	81.05	.	.	.	.	.	.	.	.	.	95.52	.	84.99		.	100	100	.	.	.	.	.	100
GCF_000722695.1_ASM72269v1	81.05	.	.	.	.	.	.	.	.	.	95.85	.	99.67	.	.	100	100	.	.	.	.	.	100
GCF_001560895.1_ASM156089v1	99.52	100	.	.	96.54	96.34	.	100	100	100	95.52	.		.	.	100	100	.	.	.	.	.	100
S1075M24C2	99.52	100	97.55	.	94.18	96.34	.	100	100	100	95.85	.		.	.	100	100	.	.	.	.	.	100
B166_S84	99.45	.	.	98.39	.	.	.	.	.	.	95.41	.	100	.	100	100	100	.	.	.	.	.	100
B168_S86	99.31	100	97.11	.	94.18	96.34	.	100	100	100	95.41	.	100	.	100	100	100	.	.	.	.	.	100
13P_S6	.	.	.	.	.	.	.	.	.	.	95.52	.		.	100	99.94	100	.	.	.	.	.	100
62P_S38	.	.	.	.	.	.	.	.	.	.	95.19	.	100	.		100	100	.	.	.	.	.	100
GCF_002096755.1_ASM209675v1	.	.	.	.	.	.	.	.	.	.	95.52	.	100	.	100	100	100	.	.	.	.	.	100
GCF_005844455.1_ASM584445v1	.	100	100	98.25	.	.	.	.	.	.	95.52	.		.	100	100	100	.	.	.	.	.	100
B49_S67	80.98	.	.	.	.	.	.	.	.	.	95.74			.	100	100	100	.	.	.	.	.	100
38P_S23	.	.	.	.	.	.	.	.	.	.	95.08	.	84.99	.	.	100	100	.	.	.	.	.	100
S1075M24C3	.	.	.	.	.	.	.	.	.	.	95.52	.	100	.	.	100	100	.	.	.	.	.	100
S1075M24C5	.	.	.	.	.	.	.	.	.	.	95.52	.	100	.	.	100	100	.	.	.	.	.	100
S1071B24C1	99.79	100	99.86	98.83	97.01	96.26	.	92.52	99.35	100	95.52	.	100	.	.	99.94	100	.	.	.	.	.	100
S1071B24C2	99.79	100	99.86	98.83	97.01	96.26	.	92.52	99.35	100	95.52	.	100	.	.	99.94	100	.	.	.	.	.	100
S1071G24C3	99.79	100	99.86	98.83	97.01	96.26	.	92.52	99.35	100	95.52	.	100	.	.	99.94	100	.	.	.	.	.	100
GCF_002096895.1_ASM209689v1	.	100	.	100	.	.	.	.	.	.	94.86	.	.	.	100	100	100	.	.	.	.	.	100
68U_S84	99.59	100	99.57	100	.	.	.	.	.	.	95.08	.	.		.	99.94	.	.	.	.	.	.	100
U143_S13	.	.	.	.	.	.	.	.	.	.	94.86	.	.	81.21	.	99.94	.	.	.	.	.	.	100
GCF_001588605.1_ASM158860v1	.	100	.	99.85	.	.	.	.	.	.	95.08	.	.	81.37	.	100	.	.	.	.	.	.	100
125U_S4	99.59	100	99.57	100	.	.	.	.	.	.	95.74	.	.	.	.	100	.	.	.	.	.	.	100
GCF_003943965.1_ASM394396v1	99.59	100	99.57	100	.	.	.	.	.	.	95.74	.	.	.	.	100	.	.	.	.	.	.	100
U134_S8	99.59	100	99.57	100	.	.	.	.	.	.	95.74	.	.	.	.	100	.	.	.	.	.	.	100
U135_S9	99.59	100	99.57	100	.	.	.	.	.	.	95.74	.	.	.	.	100	.	.	.	.	.	.	100
U148_S15	99.59	100	99.57	100	.	.	.	.	.	.	95.74	.	.	.	.	100	.	.	.	.	.	.	100
GCF_005144795.1_ASM514479v1	99.59	100	99.57	100	.	.	.	.	.	.	95.74	.	.	.	.	100	.	.	.	.	.	.	100
U15_S54	99.45	.	.	.	.	.	.	.	.	.	95.41	.		.	100	99.94	.	.	.	.	.	.	100
U63_S79	100	99.86	99.57	100	.	.	.	.	.	.	95.74	.	.		.	100	.	.	.	.	.	.	100
Smit.str18_56_v1.0	.	100	.	99.85	.	.	.	.	.	.	95.63	.	.	80.79	.	100	.	.	.	.	.	.	100
U56_S76	100	99.86	99.57	100	.	.	.	.	.	.	95.74	.	.	81.11	.	100	.	.	.	.	.	.	100
U57_S77	100	99.86	99.57	100	.	.	.	.	.	.	95.74	.	.	81.11	.	100	.	.	.	.	.	.	100
GCF_000722815.1_ASM72281v1	.	100	99.57	100	.	.	.	.	.	.	95.08	.	.	81.27	.	100	.	.	.	.	.	.	100
SmitisSK579v1.0	99.31	100	96.25	.	92.77	96.34	.	100	100	100	95.3	.	.	.	.	99.94	.	.	.	.	.	.	100
GCF_009496905.1_ASM949690v1	99.59	100	99.57	100	.	.	.	.	.	.	95.08	.	.		.	99.94	.	.	.	.	.	.	100
U67_S83	.	.	.	.	.	.	.	.	.	.	95.52	.		.	.	99.94	.	.	.	.	.	.	100
B97_S18	.	.	.	.	.	.	.	.	.	.	95.74	.		.		100	.	.	.	.	.	.	100
S1092G24C1	.	100	99.57	100	.	.	.	.	.	.	95.08	.	.	80.95	.	100	.	.	.	.	.	.	100
GCF_002096935.1_ASM209693v1	.	.	.	.	.	.	.	.	.	.	95.52	.	84.99	.	.	100	.	.	.	.	.	.	100
GCF_003942965.1_ASM394296v1	.	.	.	.	.	.	.	.	.	.	95.74	.	84.99	.	.	100	.	.	.	.	.	.	100
B111_S32	.	.	.	.	.	.	.	.	.	.	95.74	.	84.99	.	.	100	.	.	.	.	.	.	100
B125_S45	.	.	.	.	.	.	.	.	.	.	95.52	.	85.06	.	.	100	.	.	.	.	.	.	100
B78_S96	99.31	.	.	98.39	.	.	.	.	.	.	95.3	.		.	.	100	.	.	.	.	.	.	100
3P_S2	99.65	100	100	99.85	.	.	.	.	.	.	95.41	.		.	100	99.88	.	.	.	.	.	.	100
B107_S28	.	.	.	.	.	.	.	.	.	.	95.19	.		.		99.94	.	.	.	.	.	.	100
B137_S55	.	.	.	.	.	.	.	.	.	.	95.74	.		.		99.94	.	.	.	.	.	.	100
B59_S77	99.65	100	99.28	99.85	.	.	.	.	.	.	95.41	.	100	.	100	99.94	.	.	.	.	.	.	100
61P_S37	99.65	100	99.28	100	.	.	.	.	.	.	95.41	.	100	.	100	99.94	.	.	.	.	.	.	100
B155_S73	99.45	.	.	.	.	.	.	.	.	.	95.41	.		.	100	99.94	.	.	.	.	.	.	100
GCF_002860865.1_ASM286086v1	99.65	100	100	99.85	.	.	.	.	.	.	95.41	.		.	100	99.94	.	.	.	.	.	.	100
14P_S7	99.65	100	99.28	99.85	.	.	.	.	.	.	95.41	.		.	100	99.94	.	.	.	.	.	.	100
B20_S41	99.52	100	99.28	99.85	.	.	.	.	.	.	95.85	.		.	100	99.94	.	.	.	.	.	.	100
GCF_009496185.1_ASM949618v1	.	.	.	.	.	.	.	.	.	.	95.19	.	.	80.89	.	99.94	.	.	.	.	.	.	100
GCF_009496205.1_ASM949620v1	.	.	.	.	.	.	.	.	.	.	95.19	.	.	80.89	.	99.94	.	.	.	.	.	.	100
GCF_009495695.1_ASM949569v1	.	.	.	.	.	.	.	.	.	.	95.19	.	.	80.89	.	99.94	.	.	.	.	.	.	100
B3_S25	.	.	.	.	.	.	.	.	.	.	95.74	.	84.99	.	.	99.94	.	.	.	.	.	.	100
B22_S43	.	.	.	.	.	.	.	.	.	.	95.52	.	84.99	.	.	99.94	.	.	.	.	.	.	100
B1_S23	.	.	.	99.71	.	.	.	.	.	.	95.74	.		.		100	.	.	.	.	.	.	100
B67_S85	99.65	100	100	99.85	.	.	.	.	.	.	95.52	.		.	100	100	.	.	.	.	.	.	100
B96_S17	.	.	.	.	.	.	.	.	.	.	95.74			.	100	100	.	.	.	.	.	.	100
GCF_002096925.1_ASM209692v1	.	.	.	.	.	.	.	.	.	.	95.74	.	.		.	100	.	.	.	.	.	.	100
S1092G24C3	99.59	100	99.57	100	.	.	.	.	.	.	95.74	.	.		.	100	.	.	.	.	.	.	100
U117_S1	99.59	100	.	99.85	.	.	.	.	.	.	95.74	.	.	81.21	.	100	.	.	.	.	.	.	100
GCF_002096815.1_ASM209681v1	99.79	100	.	100	.	.	.	.	.	.	95.74	.	.	81.4	.	100	.	.	.	.	.	.	100
U23_S57	99.79	100	.	100	.	.	.	.	.	.	95.74	.	.	81.4	.	100	.	.	.	.	.	.	100
U24_S58	99.79	100	.	100	.	.	.	.	.	.	95.74	.	.	81.4	.	100	.	.	.	.	.	.	100
U65_S81	99.79	100	.	100	.	.	.	.	.	.	95.74	.	.	81.4	.	100	.	.	.	.	.	.	100
GCF_000960025.1_ASM96002v1	81.05	.	.	.	.	.	.	.	.	.	94.86	.	84.99	.	.	100	.	.	.	.	.	.	100
U36_S66	80.98	.	.	.	.	.	.	.	.	.	95.52	.	84.99	.	.	100	.	.	.	.	.	.	100
U39_S69	80.98	.	.	.	.	.	.	.	.	.	95.52	.	84.99	.	.	100	.	.	.	.	.	.	100
GCF_000722835.1_ASM72283v1	81.05	.	.	.	.	.	.	.	.	.	94.86	.	84.99	.	.	100	.	.	.	.	.	.	100
U123_S3	81.05	.	.	.	.	.	.	.	.	.	95.74	.	85.06	.	.	100	.	.	.	.	.	.	100
U40_S70	99.59	100	99.57	100	.	.	.	.	.	.	95.74	.	.	.	.	100	.	.	.	.	.	.	100
GCF_002860905.1_ASM286090v1	99.65	100	99.86	99.85	.	.	.	.	.	.	95.3	.		.	.	100	.	.	.	.	.	.	100
B157_S75	.	.	.	.	.	.	.	.	.	.	95.74	.		.	.	100	.	.	.	.	.	.	100
B74_S92	.	.	.	.	.	.	.	.	.	.	95.74	.		.	.	100	.	.	.	.	.	.	100
B45_S63	.	.	.	.	.	.	.	.	.	.	95.08	.		.	.	100	.	.	.	.	.	.	100
P21_S10	81.05	.	.	.	.	.	.	.	.	.	95.63	.		.	.	100	.	.	.	.	.	.	100
GCF_000960065.1_ASM96006v1	.	.	.	.	.	.	.	.	.	.	95.74	.	84.99	.	.	100	.	.	.	.	.	.	100
S1091B24C4	.	.	.	.	.	.	.	.	.	.	94.86	.	84.99	.	.	99.94	.	.	.	.	.	.	100
U14_S53	99.45	.	.	.	.	.	.	.	.	.	95.41	.		.	100	99.94	.	.	.	.	.	.	100
GCF_000722755.1_ASM72275v1	99.79	100	.	99.85	.	.	.	.	.	.	95.08	.	.	81.37	.	100	.	.	.	.	.	.	100
U28_S60	99.79	100	.	100	.	.	.	.	.	.	95.74	.	.	81.4	.	100	.	.	.	.	.	.	100
U92_S86	.	100	.	99.85	.	.	.	.	.		95.74	.	.	81.44	.	100	.	.	.	.	.	.	100
B100_S21	.	.	.	.	.	.	.	.	.	.	95.41	.	100	.	100	100		.	.	.	.	.	100
U16_S55	.	.	.	.	.	.	.	.	.	.	95.52	.		.	.	100		.	.	.	.	.	100
1P_S1	.	.	.	.	.	.	.	.	.	.	95.74	.		.	.	100		.	.	.	.	.	100
B10_S32	.	.	.	.	.	.	.	.	.	.	95.74	.		.	.	99.94		.	.	.	.	.	100
B146_S64	.	.	.	.	.	.	.	.	.	.	95.52	.	100	.	100	100	100	.	.	.	.	.	100.00;8.60
S1092G24C4	.	.	.	.	.	.	.	.	.	.	95.52	93.1	100	.	.	100	100	.	.	.	.	.	100
S1071G24C1	.	.	.	.	.	.	.	.	.	.	95.52	92.69	100	.	.	100	100	.	.	.	.	.	100
S1071G24C2	.	.	.	.	.	.	.	.	.	.	95.52	92.69	100	.	.	100	100	.	.	.	.	.	100
B117_S38	.	.	.	.	.	.	.	.	.	.	95.52	.	100	.	.	99.94	100	.	.	.	.	.	100
GCF_001074635.1_ASM107463v1	.	.	.	.	.	.	.	.	.	.	95.52	.	100	.		100	100	.	.	.	.	.	100
27P_S14	99.65	100	99.86	99.85	.	.	.	.	.	.	95.41	92.58	100	.	.	99.94	99.63	.	.	.	.	.	100
S1096G24C5	.	.	.	.	.	.	.	.	.	.	95.52	.	100	.	.	100	100	.	.	.	.	.	100
B9_S31	99.79	100	100	99.85	.	.	.	.	.	.	95.85	96.34	99.93	.	.	99.94	100	.	.	.	.	.	100
B119_S40	.	100	.	.	.	.	.	.	.	.	95.52	99.37;92.58	100	.	.	100	100		.		.	.	100
U144_S14	99.79	100	100	99.85	.	.	.	.	.	.	95.41	.	.	.	100	100	99.84	.	.	.	.	.	100
B63_S81	99.31	.	.	.	.	.	.	.	.	.	95.41	99.37	100	.	.	100	100	79.17	.	100	.	.	100
B105_S26	99.65	100	100	99.85	.	.	.	.	.	.	95.52	.		.	100	100	99.95	.	.	.	.	.	100
GCF_000722685.1_ASM72268v1	99.45	100	97.26	.	.	.	.	.	.	.	95.52	.	100	.	.	99.94	99.79	79.12	.	.	.	.	100
GCF_009496075.1_ASM949607v1	99.79	100	100	99.85	.	.	.	.	.	.	95.3	91.33	100	.	.	99.94	99.79	.	.	.	.	.	100
GCF_009496825.1_ASM949682v1	99.79	86.2	95.67		.	.	.	.	.	.	95.3	91.33	100	.	.	99.94	99.79	.	.	.	.	.	100
GCF_009496505.1_ASM949650v1	99.79	100	100	99.85	.	.	.	.	.	.	95.3	91.33	100	.	.	99.94	99.79	.	.	.	.	.	100
GCF_009496795.1_ASM949679v1	99.79	100	100	99.85	.	.	.	.	.	.	95.3	91.33	100	.	.	99.94	99.79	.	.	.	.	.	100
GCF_009496165.1_ASM949616v1	99.79	100	100	99.85	.	.	.	.	.	.	95.3	91.33	100	.	.	99.94	99.79	.	.	.	.	.	100
GCF_009496395.1_ASM949639v1	99.79	100	100	99.85	.	.	.	.	.	.	95.3	91.33	100	.	.	99.94	99.79	.	.	.	.	.	100
GCF_009496805.1_ASM949680v1	99.79	100	100	99.85	.	.	.	.	.	.	95.3	91.33	100	.	.	99.94	99.79	.	.	.	.	.	100
GCF_009496815.1_ASM949681v1	99.79	100	100	99.85	.	.	.	.	.	.	95.3	91.33	100	.	.	99.94	99.79	.	.	.	.	.	100
GCF_009496065.1_ASM949606v1	99.79	100	100	99.85	.	.	.	.	.	.	95.3	91.33	100	.	.	99.94	99.79	.	.	.	.	.	100
GCF_009496725.1_ASM949672v1	99.79	100	100	99.85	.	.	.	.	.	.	95.3	91.33	100	.	.	99.94	99.79	.	.	.	.	.	100
GCF_009496735.1_ASM949673v1	99.79	100	100	99.85	.	.	.	.	.	.	95.3	91.33	100	.	.	99.94	99.79	.	.	.	.	.	100
GCF_009496755.1_ASM949675v1	99.79	100	100	99.85	.	.	.	.	.	.	95.3	91.33	100	.	.	99.94	99.79	.	.	.	.	.	100
GCF_009495895.1_ASM949589v1	99.79	100	100	99.85	.	.	.	.	.	.	95.3	91.33	100	.	.	99.94	99.79	.	.	.	.	.	100
GCF_009496835.1_ASM949683v1	99.79	100	100	99.85	.	.	.	.	.	.	95.3	91.33	100	.	.	99.94	99.79	.	.	.	.	.	100
B148_S66	99.31	100	100	99.56	99.06	96.26	.	92.52	99.35	100	95.3	.	100	.	.	100	99.79	.	.	.	.	.	100
B79_S1	.	.	.	.	.	.	.	.	.	.	95.41	99.37		.	100	100	99.84	.	.	100	.	.	100
S1072B24C4	99.38	.	.	.	.	.	.	.	.		95.41	.	99.8	.	.	100	99.79	.	.	.	.	.	100
S1072B24C5	99.38	.	.	.	.	.	.	.	.		95.41	.	99.8	.	.	100	99.79	.	.	.	.	.	100
GCF_000722775.1_ASM72277v1	99.45	.	.	98.39	.	.	.	.	.	.	95.74	.	100	.	.	99.94	99.79	.	.	.	.	.	100
B1015G24C3	99.38	.	.	98.39	.	.	.	.	.	.	95.41	.		.	.	100	.	.	.	.	.	.	100
B19_S40	99.79	100	98.7	98.83	.	.	.	.	.	.	95.41	99.37	100	.		100	99.79	79.17	.	100	.	.	100
U126_S5	99.65	100	100	96.05	.	.	.	.	.	.	95.41	92.58	100	.	.	100	99.79	.	.	.	.	.	100
P164_S40	99.65	100	97.26	.	.	.	.	.	.	.	95.52	99.27	99.67	.	100	100	100	79.17	.		.	.	100
WTCHG_774611_73015373	.	.	.	.	.	.	.	.	.	.	95.52	99.79	100	.	.	99.94	100	.	.	.	.	.	100
B124_S44	99.65	100	99.86	99.85	.	.	.	.	.	.	95.41	.	100	.	.	100	99.84	.	.	.	.	.	100
NM4_2	.	.	.	.	.	.	.	.	.	.	95.41	.	100	.	.	99.94	99.79	.	.	.	.	.	100
B147_S65	99.52	100	100	98.54	99.37	96.26	100	100	100	100	95.41	.	100	.	100	99.94	99.79	.	.	.	.	.	100
GCF_009495705.1_ASM949570v1	99.79	100	100	99.85	.	.	.	.	.	.	95.3	91.33	100	.	.	99.94	99.79	.	.	.	.	.	100
B102_S23	99.65	100	100	99.56	99.06	96.26	.	92.52	99.35	100	95.52	92.58	100	.	100	100	99.79	79.17	.	.	.	.	100
NM2_1	.	.	.	.	.	.	.	.	.	.	95.41	.	100	.	.	99.94	99.79	.	.	.	.	.	100
B121_S42	99.65	100	99.28	99.85	.	.	.	.	.	.	95.52	.	100	.	100	99.94	99.79	.	.	.	.	.	100
GCF_009496435.1_ASM949643v1	99.79	100	100	99.85	.	.	.	.	.	.	95.3	91.33	100	.	.	99.94	99.79	.	.	.	.	.	100
GCF_009495955.1_ASM949595v1	99.79	100	100	99.85	.	.	.	.	.	.	95.3	91.33	100	.	.	99.94	99.79	.	.	.	.	.	100
GCF_009496035.1_ASM949603v1	99.79	100	100	99.85	.	.	.	.	.	.	95.3	91.33	100	.	.	99.94	99.79	.	.	.	.	.	100
GCF_009496335.1_ASM949633v1	99.79	100	100	99.85	.	.	.	.	.	.	95.3	91.33	100	.	.	99.94	99.79	.	.	.	.	.	100
GCF_009495735.1_ASM949573v1	99.79	100	100	99.85	.	.	.	.	.	.	95.3	91.33	100	.	.	99.94	99.79	.	.	.	.	.	100
GCF_009496045.1_ASM949604v1	99.79	100	100	99.85	.	.	.	.	.	.	95.3	91.33	100	.	.	99.94	99.79	.	.	.	.	.	100
GCF_009496355.1_ASM949635v1	99.79	100	100	99.85	.	.	.	.	.	.	95.3	91.33	100	.	.	99.94	99.79	.	.	.	.	.	100
GCF_009496895.1_ASM949689v1	99.79	100	100	99.85	.	.	.	.	.	.	95.3	91.33	100	.	.	99.94	99.79	.	.	.	.	.	100
S1086G24C1	.	.	.	.	.	.	.	.	.	.	95.19		100	.	100	100	100	.	.	.	.	.	100
S1071G24C4	99.79	100	99.86	98.83	97.01	96.26	.	92.52	99.35	100	94.86	.	100	.	.	100	100	.	.	.	.	.	100
S1071G24C5	99.79	100	99.86	98.83	97.01	96.26	.	92.52	99.35	100	94.86	.	100	.	.	100	100	.	.	.	.	.	100
WTCHG_774611_72895361	.	.	.	.	.	.	.	.	.	.	95.52	99.79	100	.	.	99.94	100	.	.	.	.	.	100
B88_S10	.	.	.	.	.	.	.	.	.	.	95.85		100	.	100	100	99.84	.	.	.	.	.	100

## Sheet: Data 7
CDS	Sequence
SCLS1	ATGGAAGTTATAAATGTAAGTAAACATTATGGTCATTCAATCATTCTCAAAGATATAAATTTCACACTTAACAAGGGTGAAATTGTTGGTCTAGTAGGGAGAAACGGAGTTGGTAAGAGTACATTGATGAAAATTCTTGTTCAGAATAATCAACAGACTTCAGGGAATATTATAAGTAGTGATAATGTTGGGTATTTAATCGAAGAACCAAAGTTATTTTTATCTAAAACAGGTTTAGAGAATTTAAAATATTTGTCAAATTTATATGGTGTTGATTACAATAAAGAAAGATTTGGGAGTTTGATTCAAAAGTTAGATTTGACTCAGTCTATTAATAAAAAAGTAAAGACCTATTCTTTGGGTACAAAACAAAAATTAGCTTTGCTTCTAACTCTCGTT…
SCLS2	ATGAAATTAAATAAATTGAATTTTCTTAAGGAAAATATAAGAGATTTATATTCATCAGGCGTAATATATCTCGGATTGATTATCTCGTTTATACCGCCGATACTGGTTACATTCTTTATTCTAAAGACTCAAGGGACATCACTTGGTATTAAGCATATTTCAAATTTTTATGCTATGCTCGGTATGTTAATGGCTGTTATACATGCTAACCGAATTATTAGCAGGGATTTTTCTAACAATACGATCAGTTTATTTTATAATCAAAAGAAAAATCGGATGATTTACGTCTTGTCTAATTTTCTATATGCCATCTCAGTTTCTATTATTTATGCTTTGAATGGCATTGTGCTACTAGTCATCGTATGTAAATTGGGTGTTCCAGGTGATTTAGGATTAGAT…
SCLS3	ATGCTTAAAGAATTGTATGAAGAAGTCCAGGGAATTGTATATAAGTGTAGAAATGAATATTACCTTCATTTGTGGGAGTTATCGGACTGGGATCAAGAGGGAATGATTTGCCTACATGAATTGATTAGTAGCGAAGAAGGGCTAATAGACGATATTCCTCGTTTACGTAAATACTTCAAAACAAAATTCCGGAATCGAATTCTAGATTATCTCCGTAAACAAGAAAGTCAAAAACGGAGATATGATAAAGAGCTTTATGAAGAAGTGGGTGAGATAAGTCATCGTATAAGTGAGGGAGGACTCTGGCTAGACGATTATTATCTCTTTCATGAGACACTAAGAGATTATAGAAGCAAACAAAGTAAAGACAAACAAGAAGAGTTAGAACGCGTCTTAAGA…
SCLS4	ATGAGCCTATCAGAGAATGATAAGAGAGTATTAAGACTAATCAAAGTGGGGGCTGAGAATTCCATAACAGGGGCTGAAATCAGCCTAATCACCAAACTAGCAGAAAGAACCGTACAGGACATTATCAGCCGTCTGATCACGCGCTACGGCGTTCCTATCATCGGGGTACGTCACGGATCTTTTAGAGGATATTTTATCCCAGCAAATAAAGATGAGCTATTGGACGGTGCAAAAACATTTTACAATCAGATCCGAGAAGAAGAAAAGCGCCTATCGGTATTGATGAATAGCGACCTAGAAAGTTATAAGGATTTACTAAAGGGGGTATGTGGATATGTTTAG
SCLS5	ATGTATAGCCAAGCGAGCCCTACTGCAAATAGTATAGACTTCACCCTTCTACTTTATCATCGTGCTCCTTGCCTGCCTCACGGGACAGGTTTAAAGGAATATTTAGTTATCAATTACTATAGCACAAAGCATGCTTAA
SCLS6	ATGGAAATGAAAAATACATTTGTAGAATTAGAACAATTTGAAGAGTTAACTCCAGAAGTTTTGGAGGAAGTGAATGGTGGAGGGAATTTCTTTTGTTCTTTGTTTGGGCTTTGCCAACCTCGGTATTGTAGTCCAGCACCAACTAAAACTATGATTGGATAG
SCLS7	ATGGTTATTTTCATTTTGATGGTTGTGATATTTCTGTATTATGTAATTACAGAGTATTTTCAGAATAGTTATATTGACTGTATACTATTTTTAACATTGCTGATTTCTCATTTGATATGGGATTACTATTTTTTGCCCATTGAAGTCTTAGTAGCATTAAGTGGAGTAAATTTGTTGTCAAGATTTTTCAAAAAAAAAGAGAAGTCAATAGATTTGTTAGTGGATTATAAAGATGAAAGGTAA
SCLS8	ATGGATATCGATACAAGTAGACTAAGAACTGATTTGCCACAGGTTGGAGAGCAACCATACAGACAAATTCATGCACATTCAACAGGAAATCCCAATTCAACAGCCCAAAATGAAGCAGACTACCATATGCGTCGTCCTGTTGATTCAGGCTTTTTCTCGCACGTTGTCGGCAACGGCCATGTAATGCAGACCTGGTACACAGATATGGGAGCCTATGACGTAGGAGGTGGCTGGAACGTTGAAGGATACGGACAAGTTGAACTGATTGAAAGTCATAGCACAAAAGAAGAATTCATGCGCGATTACAAGCTCTATGTTGAGCTTCTGCGGAACCTTGCTGATGAAGCAGGGATTCCGAAAACGCTGGACTCTGACAGCCTAGCAGGAATCAAGACACAT…
SCLS9	ATGGCATTAAATATATTTGAAGTTGTTCGGTATGAAGGAGAAGATACTAGGAATATACTAGCTTGGCGACATCCTAATAAAAATATGAAACCTGGAACAACTTTGATTGTTAATCCTGGTCAGCGAGCTGTTTTTTTCTCAAATGGTCGAGCTGTTGAAAGTTATGAGGAAGGTAAACATAAGATTGATGGAAACAATACTCAGTTTCTATCTGGACTAAAATCTTTTGTCAGTGGGGGTGTGTCACCAGATTCTTCGTTCCTTTGGTTTGTCAACATGTACGATTTACAACCAATTGGATGGGGGACACCGTCACCGATATTGGTTAGAGATCCAGAAAGTCAAATTCCTGTTGAGCTAAAATCGTATGGGAACTTTATTCCGAGAATTGTTGATTTA…
SCLS10	TTGAAAAATAAGTTGGGAATAATATTCTATCGGATTTTATCAAGGGCATATTTCTATTTACCCTTTTTATTAATAATTTTATATTCAAAAGGATACTCAATTATAGGTATAGAATTATTGATGTCTTGTTATGGAATAGGAACGTTTGTAAGTTCTACTTTTATTAAAAGGTACATTAGCAATATTCCATCAAAGAGATTATTAATTCTGAGTGAAGTTGTCAAATTAATTGGATTAGGGTTATTAAGTTTATCTGATAGTACAATTTTAATTGTTATTGCTCAACTATGCTTAGGAGCAAGCTATTCTATTGGAGCTGGTGAGGATACTAATCTTATCCAGTACTTCTTAGATTCTGAAGCAACTGATTTTCAAAATAGAACAAATGGCTATATGTTC…
SCLS11	ATGAACGAACTAGAAAGAACAGCCCTCAACGAGATATTGAGGACCGTGACATATATTGCTGAGAAAGTGGATGAGTTAGATTCTAAGATTTCTTTGAACGATTCACAAGTTCCTGTACTGACCCTAAAAAGTTGGACAATTAATTTATCCGAAGGATTTAGTTCTGTATTGCACAGGGCTAAGTCCTTTTAG
SCLS12	ATGAACTTAGATTGGTATTACACTTTTTTGGTATTATCAAAACATCTCAATTATCGTAAAGCCAGCGAAGAGCTATTTCTTACCGAACCAACACTACATCAACAAATTAAGAAATTAGAAAAGCACCTTCAAGTTCAACTTTTCGAAACAGTGGGAAGAAACTTGACACTAACTGCTGTTGGAAGAGAATTTATAGAGATTGCTGAAAATCTTATACAAACCTATGAGCAAAGTATTCAAAAGATTAGGCTACAAAATAAAAAACAACAATTTCATATAGAAATAGCCGTATCTCCTTACATTGCCACATACCTTTTACCACAATTTTTACAGGAATTCTTTCAGCGCTATCCAGATATTGATATCTCTGTATCCGTGCTAAATAGCCATATTGAACAA…
SCLS13	ATGAAAATTAAAACAACATTTAATAATATTTTACCAAAGGAGTTTGGAAAGGAAGCAAAAAGGGAAGATATAATGCAAGGAAATCCGGTTCGTTCTTTTGCGTTTGAAGTTGATAATTTACCCAAAGGTACTGAATATATCGCTTTTACTCTTATTGATTATGATGCCATTCCTGTTTGCTCTTTTCCTTGGATTCATTGGAGCGTTGCTGATTTAAAAGTTAATGGTGATAGTATTCAGATTGAAGAAAATATGAGCCGAATTGGTCAATTAATTCAAGGTAAAAATAGTTTTTCTAGTCAATTTTTAGATGGTGATTTTTCTGAAATTGATACAATGTTTGTTGGACCGACTCCACCTGATCGAGACCATAACTATACTTTAAAAGTGTTTGCATTA…
SCLS14	ATGAGTAAAAATATTTGGATTTATGTAGCTGGTGCTGTGACCATCATTACTACAATTATTTTAGGATTATTAATTCCGCATCTATCTATTTCTTTATACTATGTTGCCTTGGGATTTTTAGTAATAGCAGAGTTTGTGTTTTTCCTACAAATGGTTATCAAGCGTCAATTTACAGATTGGCTACCAATCAATGTAGTTACAGCTATTTGGATAATTGGGCAAGTTTTCATGATGCCTCTAGTACAAATTTTACCAAGTTTTCTATTTTGGATTATTGAAGTACTAGCAATCGGTTTGGTGGCCATTATAGGCTCTTTAACAGCAGCGGATAGCCACTATCGTAAAGAACGGGCAGAAGCTTTCTCAGAAAATGCAGAGGATGTTTTTAATACTAAAAAG…
SCLS15	ATGATACGGCGACCACCGAGATCTACACCCAGTATCACACTCTTTCCCTACACGACGCTCTTCCGATCTTCTTTGTTCGAAAAAATAAAAGAACTTTGCCAAAATCGTGGAATTTCTATAAATTCTCTTGAAGAAACATTAGGATATAGTAGAAATACAATCTATAGTATGAAAAACAAAAAACCAAATGCTGAACGTCTTCAAGAAATTGCTGACTACTTCAACGTGTCCACAGATTATTTACTTGGTCGCACGGATAACCCAGCAATCGCTGGTAATTCCAAAGAGTACACCTGGCAAGGTAAGACACTGAATGTTGAAGAAATGGCATCTAATGTCATGATGTTTGGTGGCCGAGAATTAACAGACGAAAAGAAGAAAATCATCCAGTCTATCATT…

## Sheet: Data 8
Sample	Sample_name	Public_name	Lane_id	Study_name	Country	Region	Submitting_institution	Year	Clinical_manifestation	Source	ERR	ERS	In_silico_ST	GPSC	In_silico_serotype	WGS_PEN	WGS_PEN_SIR_Meningitis	WGS_PEN_SIR_Nonmeningitis	WGS_AMO	WGS_AMO_SIR	WGS_MER	WGS_MER_SIR	WGS_TAX	WGS_TAX_SIR_Meningitis	WGS_TAX_SIR_Nonmeningitis	WGS_CFT	WGS_CFT_SIR_Meningitis	WGS_CFT_SIR_Nonmeningitis	WGS_CFX	WGS_CFX_SIR	WGS_ERY	WGS_ERY_SIR	WGS_CLI	WGS_CLI_SIR	WGS_SYN	WGS_SYN_SIR	WGS_LZO	WGS_LZO_SIR	WGS_ERY_CLI	WGS_COT	WGS_COT_SIR	WGS_TET	WGS_TET_SIR	WGS_DOX	WGS_DOX_SIR	WGS_LFX	WGS_LFX_SIR	WGS_CHL	WGS_CHL_SIR
2245STDY5486378	0205_99	0205_99	9950_2#81	ACTIVE_BACTERIAL_CORE_SURVEILLANCE	UNITED STATES	SAN FRANCISCO	CDC	1998	BACTEREMIA	BLOOD	ERR326496	ERS221865	113	50	18C	<=0.03	S	S	<=0.03	S	<=0.06	S	<=0.06	S	S	<=0.5	S	S	<=0.5	S	0.06	S	0.06	S	<=1	S	<=2	S	NEG	0.5	S	<=0.25	S	<=0.25	S	<=2	S	<=2	S
2245STDY5486322	0446_99	0446_99	9950_2#26	ACTIVE_BACTERIAL_CORE_SURVEILLANCE	UNITED STATES	TENNESSEE	CDC	1998	BACTEREMIA	BLOOD	ERR326441	ERS221809	643	6	9V	0.25	R	S	0.25	S	0.12	S	0.12	S	S	<=0.5	S	S	1	I	0.06	S	0.06	S	<=1	S	<=2	S	NEG	0.5	S	<=0.25	S	<=0.25	S	<=2	S	<=2	S
2245STDY5486331	0606_99	0606_99	9950_2#35	ACTIVE_BACTERIAL_CORE_SURVEILLANCE	UNITED STATES	CONNECTICUT	CDC	1998	BACTEREMIA	BLOOD	ERR326450	ERS221818	124	39	14	<=0.03	S	S	<=0.03	S	<=0.06	S	<=0.06	S	S	<=0.5	S	S	<=0.5	S	0.06	S	0.06	S	<=1	S	<=2	S	NEG	0.5	S	<=0.25	S	<=0.25	S	<=2	S	<=2	S
2245STDY5486339	0718_99	0718_99	9950_2#42	ACTIVE_BACTERIAL_CORE_SURVEILLANCE	UNITED STATES	MARYLAND	CDC	1998	BACTEREMIA	BLOOD	ERR326457	ERS221826	72	16	24F	<=0.03	S	S	<=0.03	S	<=0.06	S	<=0.06	S	S	<=0.5	S	S	<=0.5	S	0.06	S	0.06	S	<=1	S	<=2	S	NEG	0.5	S	<=0.25	S	<=0.25	S	FLAG	FLAG	<=2	S
2245STDY5486363	0761_99	0761_99	9950_2#66	ACTIVE_BACTERIAL_CORE_SURVEILLANCE	UNITED STATES	MARYLAND	CDC	1998	BACTEREMIA	BLOOD	ERR326481	ERS221850	162	6	9V	<=0.03	S	S	<=0.03	S	<=0.06	S	<=0.06	S	S	<=0.5	S	S	<=0.5	S	0.06	S	0.06	S	<=1	S	<=2	S	NEG	0.5	S	<=0.25	S	<=0.25	S	<=2	S	<=2	S
2245STDY5486294	1347_00	1347_00	9950_2#9	ACTIVE_BACTERIAL_CORE_SURVEILLANCE	UNITED STATES	NEW YORK	CDC	1999	BACTEREMIA	BLOOD	ERR326424	ERS221781	9	18	14	<=0.03	S	S	<=0.03	S	<=0.06	S	<=0.06	S	S	<=0.5	S	S	<=0.5	S	8	R	0.06	S	<=1	S	<=2	S	NEG	0.5	S	<=0.25	S	<=0.25	S	<=2	S	<=2	S
2245STDY5486326	1422_00	1422_00	9950_2#30	ACTIVE_BACTERIAL_CORE_SURVEILLANCE	UNITED STATES	GEORGIA	CDC	1999	BACTEREMIA	BLOOD	ERR326445	ERS221813	90	23	6B	2	R	S	2	S	0.5	I	1	I	S	1	I	S	>2	R	>32	R	>2	R	<=1	S	<=2	S	POS	>=4	R	>8	R	>=1	R	<=2	S	<=2	S
2245STDY5486335	1475_00	1475_00	9950_2#39	ACTIVE_BACTERIAL_CORE_SURVEILLANCE	UNITED STATES	NEW YORK	CDC	1999	BACTEREMIA	BLOOD	ERR326454	ERS221822	1340	119	19F	<=0.03	S	S	<=0.03	S	<=0.06	S	<=0.06	S	S	<=0.5	S	S	<=0.5	S	0.06	S	0.06	S	<=1	S	<=2	S	NEG	0.5	S	<=0.25	S	<=0.25	S	<=2	S	<=2	S
2245STDY5486458	1558_99	1558_99	9950_3#69	ACTIVE_BACTERIAL_CORE_SURVEILLANCE	UNITED STATES	TENNESSEE	CDC	1998	BACTEREMIA	BLOOD	ERR326575	ERS221944	156	6	9V	2	R	S	2	S	0.5	I	1	I	S	1	I	S	>2	R	0.06	S	0.06	S	<=1	S	<=2	S	NEG	>=4	R	<=0.25	S	<=0.25	S	<=2	S	<=2	S
2245STDY5486358	1864_00	1864_00	9950_2#61	ACTIVE_BACTERIAL_CORE_SURVEILLANCE	UNITED STATES	NEW YORK	CDC	1999	BACTEREMIA	BLOOD	ERR326476	ERS221845	162	6	19F	0.12	R	S	0.12	S	<=0.06	S	<=0.06	S	S	<=0.5	S	S	<=0.5	S	8	R	0.06	S	<=1	S	<=2	S	NEG	0.5	S	<=0.25	S	<=0.25	S	<=2	S	<=2	S
2245STDY5486380	2291_99	2291_99	9950_2#83	ACTIVE_BACTERIAL_CORE_SURVEILLANCE	UNITED STATES	CONNECTICUT	CDC	1998	BACTEREMIA	BLOOD	ERR326498	ERS221867	156	6	14	2	R	S	2	S	0.5	I	1	I	S	1	I	S	>2	R	0.06	S	0.06	S	<=1	S	<=2	S	NEG	>=4	R	<=0.25	S	<=0.25	S	<=2	S	<=2	S
2245STDY5486325	2451_99	2451_99	9950_2#29	ACTIVE_BACTERIAL_CORE_SURVEILLANCE	UNITED STATES	CONNECTICUT	CDC	1998	BACTEREMIA	BLOOD	ERR326444	ERS221812	205	27	4	<=0.03	S	S	<=0.03	S	<=0.06	S	<=0.06	S	S	<=0.5	S	S	<=0.5	S	0.06	S	0.06	S	<=1	S	<=2	S	NEG	0.5	S	<=0.25	S	<=0.25	S	<=2	S	<=2	S
2245STDY5486449	3053_99	3053_99	9950_3#60	ACTIVE_BACTERIAL_CORE_SURVEILLANCE	UNITED STATES	NEW YORK	CDC	1998	BACTEREMIA	BLOOD	ERR326566	ERS221935	496	3	18C	<=0.03	S	S	<=0.03	S	<=0.06	S	<=0.06	S	S	<=0.5	S	S	<=0.5	S	0.06	S	0.06	S	<=1	S	<=2	S	NEG	0.5	S	<=0.25	S	<=0.25	S	<=2	S	<=2	S
2245STDY5486356	3076_03	3076_03	9950_2#59	ACTIVE_BACTERIAL_CORE_SURVEILLANCE	UNITED STATES	MINNESOTA	CDC	1999	BACTEREMIA	BLOOD	ERR326474	ERS221843	205	27	4	<=0.03	S	S	<=0.03	S	<=0.06	S	<=0.06	S	S	<=0.5	S	S	<=0.5	S	0.06	S	0.06	S	<=1	S	<=2	S	NEG	2	I	<=0.25	S	<=0.25	S	<=2	S	<=2	S
2245STDY5486288	3143_06	3143_06	9950_2#7	ACTIVE_BACTERIAL_CORE_SURVEILLANCE	UNITED STATES	NEW YORK	CDC	2005	BACTEREMIA	BLOOD	ERR326422	ERS221776	320	1	19A	4	R	I	8	R	1	R	2	R	I	2	R	I	>2	R	>32	R	>2	R	<=1	S	<=2	S	POS	>=4	R	>8	R	>=1	R	<=2	S	<=2	S
2245STDY5486471	3547_99	3547_99	9950_3#82	ACTIVE_BACTERIAL_CORE_SURVEILLANCE	UNITED STATES	CONNECTICUT	CDC	1998	BACTEREMIA	BLOOD	ERR326588	ERS221957	695	27	4	<=0.03	S	S	<=0.03	S	<=0.06	S	<=0.06	S	S	<=0.5	S	S	<=0.5	S	0.06	S	0.06	S	<=1	S	<=2	S	NEG	0.5	S	<=0.25	S	<=0.25	S	<=2	S	<=2	S
2245STDY5486394	3863_00	3863_00	9950_3#5	ACTIVE_BACTERIAL_CORE_SURVEILLANCE	UNITED STATES	TENNESSEE	CDC	1999	BACTEREMIA	BLOOD	ERR326511	ERS221880	113	50	18C	<=0.03	S	S	<=0.03	S	<=0.06	S	<=0.06	S	S	<=0.5	S	S	<=0.5	S	0.06	S	0.06	S	<=1	S	<=2	S	NEG	0.5	S	<=0.25	S	<=0.25	S	<=2	S	<=2	S
2245STDY5562517	3868_98	3868_98	11657_2#5	ACTIVE_BACTERIAL_CORE_SURVEILLANCE	UNITED STATES	GEORGIA	CDC	1998	BACTEREMIA	BLOOD	ERR433526	ERS322551	690	13	6A	0.25	R	S	0.5	S	<=0.06	S	0.25	S	S	<=0.5	S	S	1	I	0.06	S	0.06	S	<=1	S	<=2	S	NEG	0.5	S	<=0.25	S	<=0.25	S	<=2	S	<=2	S
2245STDY5486402	3869_00	3869_00	9950_3#13	ACTIVE_BACTERIAL_CORE_SURVEILLANCE	UNITED STATES	TENNESSEE	CDC	1999	BACTEREMIA	BLOOD	ERR326519	ERS221888	624	23	6B	4	R	I	4	I	1	R	8	R	R	2	R	I	>2	R	0.06	S	0.06	S	<=1	S	<=2	S	NEG	>=4	R	<=0.25	S	<=0.25	S	<=2	S	<=2	S
2245STDY5486382	3926_00	3926_00	9950_2#85	ACTIVE_BACTERIAL_CORE_SURVEILLANCE	UNITED STATES	TENNESSEE	CDC	1999	BACTEREMIA	BLOOD	ERR326500	ERS221869	247	27	4	<=0.03	S	S	<=0.03	S	<=0.06	S	<=0.06	S	S	<=0.5	S	S	<=0.5	S	0.06	S	0.06	S	<=1	S	<=2	S	NEG	0.5	S	<=0.25	S	<=0.25	S	<=2	S	<=2	S
2245STDY5486321	4314_99	4314_99	9950_2#25	ACTIVE_BACTERIAL_CORE_SURVEILLANCE	UNITED STATES	GEORGIA	CDC	1999	BACTEREMIA	BLOOD	ERR326440	ERS221808	199	4	15B/15C	<=0.03	S	S	<=0.03	S	<=0.06	S	<=0.06	S	S	<=0.5	S	S	<=0.5	S	0.06	S	0.06	S	<=1	S	<=2	S	NEG	0.5	S	<=0.25	S	<=0.25	S	<=2	S	<=2	S
2245STDY5486264	4336_05	4336_05	9950_1#76	ACTIVE_BACTERIAL_CORE_SURVEILLANCE	UNITED STATES	MINNESOTA	CDC	2004	BACTEREMIA	BLOOD	ERR326400	ERS221754	393	38	38	<=0.03	S	S	<=0.03	S	<=0.06	S	<=0.06	S	S	<=0.5	S	S	<=0.5	S	>32	R	>2	R	<=1	S	<=2	S	POS	0.5	S	<=0.25	S	<=0.25	S	<=2	S	<=2	S
2245STDY5486369	4489_99	4489_99	9950_2#72	ACTIVE_BACTERIAL_CORE_SURVEILLANCE	UNITED STATES	MARYLAND	CDC	1998	BACTEREMIA	BLOOD	ERR326487	ERS221856	251	119	19F	NF	NF	NF	NF	NF	NF	NF	NF	NF	NF	NF	NF	NF	NF	NF	0.06	S	0.06	S	<=1	S	<=2	S	NEG	0.5	S	<=0.25	S	<=0.25	S	<=2	S	<=2	S
2245STDY5486460	4516_99	4516_99	9950_3#71	ACTIVE_BACTERIAL_CORE_SURVEILLANCE	UNITED STATES	MARYLAND	CDC	1998	BACTEREMIA	BLOOD	ERR326577	ERS221946	8487	1	19F	8	R	R	>8	R	>1	R	16	R	R	8	R	R	>2	R	8	R	0.06	S	<=1	S	<=2	S	NEG	>=4	R	>8	R	>=1	R	<=2	S	<=2	S
2245STDY5486461	4917_99	4917_99	9950_3#72	ACTIVE_BACTERIAL_CORE_SURVEILLANCE	UNITED STATES	GEORGIA	CDC	1999	BACTEREMIA	BLOOD	ERR326578	ERS221947	199	4	19A	0.12	R	S	0.12	S	<=0.06	S	<=0.06	S	S	<=0.5	S	S	<=0.5	S	8	R	0.06	S	<=1	S	<=2	S	NEG	>=4	R	<=0.25	S	<=0.25	S	<=2	S	<=2	S
2245STDY5486390	5007_99	5007_99	9950_3#1	ACTIVE_BACTERIAL_CORE_SURVEILLANCE	UNITED STATES	MARYLAND	CDC	1998	BACTEREMIA	BLOOD	ERR326507	ERS221876	205	27	4	<=0.03	S	S	<=0.03	S	<=0.06	S	<=0.06	S	S	<=0.5	S	S	<=0.5	S	0.06	S	0.06	S	<=1	S	<=2	S	NEG	0.5	S	<=0.25	S	<=0.25	S	<=2	S	<=2	S
2245STDY5486398	5010_99	5010_99	9950_3#9	ACTIVE_BACTERIAL_CORE_SURVEILLANCE	UNITED STATES	MARYLAND	CDC	1998	BACTEREMIA	BLOOD	ERR326515	ERS221884	2051	23	6B	8	R	R	>8	R	>1	R	8	R	R	4	R	R	>2	R	8	R	0.06	S	<=1	S	<=2	S	NEG	>=4	R	>8	R	>=1	R	<=2	S	<=2	S
2245STDY5486444	5775_99	5775_99	9950_3#55	ACTIVE_BACTERIAL_CORE_SURVEILLANCE	UNITED STATES	CONNECTICUT	CDC	1999	BACTEREMIA	BLOOD	ERR326561	ERS221930	654	119	19F	<=0.03	S	S	<=0.03	S	<=0.06	S	<=0.06	S	S	<=0.5	S	S	<=0.5	S	0.06	S	0.06	S	<=1	S	<=2	S	NEG	0.5	S	<=0.25	S	<=0.25	S	<=2	S	<=2	S
2245STDY5486479	6000_99	6000_99	9950_3#90	ACTIVE_BACTERIAL_CORE_SURVEILLANCE	UNITED STATES	GEORGIA	CDC	1999	BACTEREMIA	BLOOD	ERR326596	ERS221965	433	19	22F	<=0.03	S	S	<=0.03	S	<=0.06	S	<=0.06	S	S	<=0.5	S	S	<=0.5	S	0.06	S	0.06	S	<=1	S	<=2	S	NEG	0.5	S	<=0.25	S	<=0.25	S	<=2	S	<=2	S
2245STDY5486368	6223_99	6223_99	9950_2#71	ACTIVE_BACTERIAL_CORE_SURVEILLANCE	UNITED STATES	MARYLAND	CDC	1999	BACTEREMIA	BLOOD	ERR326486	ERS221855	113	50	18C	<=0.03	S	S	<=0.03	S	<=0.06	S	<=0.06	S	S	<=0.5	S	S	<=0.5	S	0.06	S	0.06	S	<=1	S	<=2	S	NEG	0.5	S	<=0.25	S	<=0.25	S	<=2	S	<=2	S
2245STDY5486475	6543_99	6543_99	9950_3#86	ACTIVE_BACTERIAL_CORE_SURVEILLANCE	UNITED STATES	OREGON	CDC	1999	BACTEREMIA	BLOOD	ERR326592	ERS221961	113	50	18C	<=0.03	S	S	<=0.03	S	<=0.06	S	<=0.06	S	S	<=0.5	S	S	<=0.5	S	0.06	S	0.06	S	<=1	S	<=2	S	NEG	0.5	S	<=0.25	S	<=0.25	S	<=2	S	<=2	S
2245STDY5486388	6583_99	6583_99	9950_2#90	ACTIVE_BACTERIAL_CORE_SURVEILLANCE	UNITED STATES	GEORGIA	CDC	1999	BACTEREMIA	BLOOD	ERR326505	ERS221874	667	4	19A	<=0.03	S	S	<=0.03	S	<=0.06	S	<=0.06	S	S	<=0.5	S	S	<=0.5	S	0.06	S	0.06	S	<=1	S	<=2	S	NEG	0.5	S	>8	R	>=1	R	<=2	S	<=2	S
2245STDY5486462	7020_99	7020_99	9950_3#73	ACTIVE_BACTERIAL_CORE_SURVEILLANCE	UNITED STATES	NEW YORK	CDC	1999	BACTEREMIA	BLOOD	ERR326579	ERS221948	124	39	14	<=0.03	S	S	<=0.03	S	<=0.06	S	<=0.06	S	S	<=0.5	S	S	<=0.5	S	0.06	S	0.06	S	<=1	S	<=2	S	NEG	0.5	S	<=0.25	S	<=0.25	S	<=2	S	<=2	S
2245STDY5486470	7022_99	7022_99	9950_3#81	ACTIVE_BACTERIAL_CORE_SURVEILLANCE	UNITED STATES	NEW YORK	CDC	1999	BACTEREMIA	BLOOD	ERR326587	ERS221956	9447	7	23F	<=0.03	S	S	<=0.03	S	<=0.06	S	<=0.06	S	S	<=0.5	S	S	<=0.5	S	0.06	S	0.06	S	<=1	S	<=2	S	NEG	0.5	S	<=0.25	S	<=0.25	S	<=2	S	<=2	S
2245STDY5486407	7187_99	7187_99	9950_3#18	ACTIVE_BACTERIAL_CORE_SURVEILLANCE	UNITED STATES	SAN FRANCISCO	CDC	1999	BACTEREMIA	BLOOD	ERR326524	ERS221893	146	23	6B	<=0.03	S	S	<=0.03	S	<=0.06	S	<=0.06	S	S	<=0.5	S	S	<=0.5	S	0.06	S	0.06	S	<=1	S	<=2	S	NEG	2	I	<=0.25	S	<=0.25	S	<=2	S	<=2	S
2245STDY5486423	7255_99	7255_99	9950_3#34	ACTIVE_BACTERIAL_CORE_SURVEILLANCE	UNITED STATES	TENNESSEE	CDC	1999	BACTEREMIA	BLOOD	ERR326540	ERS221909	13	18	14	8	R	R	>8	R	>1	R	8	R	R	4	R	R	>2	R	8	R	0.06	S	<=1	S	<=2	S	NEG	>=4	R	<=0.25	S	<=0.25	S	<=2	S	<=2	S
2245STDY5486448	7525_99	7525_99	9950_3#59	ACTIVE_BACTERIAL_CORE_SURVEILLANCE	UNITED STATES	GEORGIA	CDC	1999	BACTEREMIA	BLOOD	ERR326565	ERS221934	13	18	14	4	R	I	8	R	1	R	1	I	S	2	R	I	>2	R	8	R	0.06	S	<=1	S	<=2	S	NEG	>=4	R	<=0.25	S	<=0.25	S	<=2	S	<=2	S
2245STDY5562294	0036_00	0036_00	11511_7#13	ACTIVE_BACTERIAL_CORE_SURVEILLANCE	UNITED STATES	GEORGIA	CDC	1999	BACTEREMIA	BLOOD	ERR425367	ERS322334	651	1	19F	2	R	S	2	S	0.5	I	1	I	S	1	I	S	>2	R	8	R	0.06	S	<=1	S	<=2	S	NEG	>=4	R	>8	R	>=1	R	<=2	S	<=2	S
2245STDY5562546	0068_99	0068_99	11657_2#28	ACTIVE_BACTERIAL_CORE_SURVEILLANCE	UNITED STATES	NEW YORK	CDC	1998	BACTEREMIA	BLOOD	ERR433548	ERS322578	1480	98	8	<=0.03	S	S	<=0.03	S	<=0.06	S	<=0.06	S	S	<=0.5	S	S	<=0.5	S	0.06	S	0.06	S	<=1	S	<=2	S	NEG	0.5	S	<=0.25	S	<=0.25	S	<=2	S	<=2	S
2245STDY5699131	0131_99	0131_99	12291_5#16	ACTIVE_BACTERIAL_CORE_SURVEILLANCE	UNITED STATES	OREGON	CDC	1998	BACTEREMIA	BLOOD	ERR505818	ERS394232	33	7	23F	<=0.03	S	S	<=0.03	S	<=0.06	S	<=0.06	S	S	<=0.5	S	S	<=0.5	S	0.06	S	0.06	S	<=1	S	<=2	S	NEG	>=4	R	<=0.25	S	<=0.25	S	<=2	S	<=2	S
2245STDY5562598	0133_99	0133_99	11657_2#52	ACTIVE_BACTERIAL_CORE_SURVEILLANCE	UNITED STATES	OREGON	CDC	1998	BACTEREMIA	BLOOD	ERR433566	ERS322630	9513	50	18C	<=0.03	S	S	<=0.03	S	<=0.06	S	<=0.06	S	S	<=0.5	S	S	<=0.5	S	0.06	S	0.06	S	<=1	S	<=2	S	NEG	0.5	S	<=0.25	S	<=0.25	S	<=2	S	<=2	S
2245STDY5609103	0328_99	0328_99	11657_8#65	ACTIVE_BACTERIAL_CORE_SURVEILLANCE	UNITED STATES	TENNESSEE	CDC	1998	BACTEREMIA	BLOOD	ERR433756	ERS356473	9922	23	6B	2	R	S	4	I	0.5	I	4	R	R	2	R	I	>2	R	0.06	S	0.06	S	<=1	S	<=2	S	NEG	>=4	R	<=0.25	S	<=0.25	S	<=2	S	<=2	S
2245STDY5562494	0392_00	0392_00	11822_1#69	ACTIVE_BACTERIAL_CORE_SURVEILLANCE	UNITED STATES	GEORGIA	CDC	1999	BACTEREMIA	BLOOD	ERR449158	ERS322528	9565	50	18C	<=0.03	S	S	<=0.03	S	<=0.06	S	<=0.06	S	S	<=0.5	S	S	<=0.5	S	0.06	S	0.06	S	<=1	S	<=2	S	NEG	0.5	S	<=0.25	S	<=0.25	S	<=2	S	<=2	S
2245STDY5562495	0431_00	0431_00	11822_1#70	ACTIVE_BACTERIAL_CORE_SURVEILLANCE	UNITED STATES	GEORGIA	CDC	1999	BACTEREMIA	BLOOD	ERR449159	ERS322529	425	175	19F	<=0.03	S	S	<=0.03	S	<=0.06	S	<=0.06	S	S	<=0.5	S	S	<=0.5	S	0.06	S	0.06	S	<=1	S	<=2	S	NEG	0.5	S	<=0.25	S	<=0.25	S	<=2	S	<=2	S
2245STDY5562705	0444_99	0444_99	11658_1#13	ACTIVE_BACTERIAL_CORE_SURVEILLANCE	UNITED STATES	TENNESSEE	CDC	1998	BACTEREMIA	BLOOD	ERR433782	ERS322730	242	14	23F	<=0.03	S	S	<=0.03	S	<=0.06	S	<=0.06	S	S	<=0.5	S	S	<=0.5	S	8	R	0.06	S	<=1	S	<=2	S	NEG	>=4	R	>8	R	>=1	R	<=2	S	<=2	S
2245STDY5562550	0452_99	0452_99	11893_8#9	ACTIVE_BACTERIAL_CORE_SURVEILLANCE	UNITED STATES	TENNESSEE	CDC	1998	BACTEREMIA	BLOOD	ERR460195	ERS322582	384	23	6B	2	R	S	4	I	1	R	1	I	S	1	I	S	>2	R	8	R	0.06	S	<=1	S	<=2	S	NEG	>=4	R	>8	R	>=1	R	<=2	S	<=2	S
2245STDY5562448	0581_99	0581_99	11826_1#37	ACTIVE_BACTERIAL_CORE_SURVEILLANCE	UNITED STATES	CONNECTICUT	CDC	1998	BACTEREMIA	BLOOD	ERR449224	ERS322482	113	50	18C	<=0.03	S	S	<=0.03	S	<=0.06	S	<=0.06	S	S	<=0.5	S	S	<=0.5	S	0.06	S	0.06	S	<=1	S	<=2	S	NEG	2	I	<=0.25	S	<=0.25	S	<=2	S	<=2	S
2245STDY5562450	0602_99	0602_99	11826_1#39	ACTIVE_BACTERIAL_CORE_SURVEILLANCE	UNITED STATES	CONNECTICUT	CDC	1998	BACTEREMIA	BLOOD	ERR449226	ERS322484	62	3	11A	<=0.03	S	S	<=0.03	S	<=0.06	S	<=0.06	S	S	<=0.5	S	S	<=0.5	S	0.06	S	0.06	S	<=1	S	<=2	S	NEG	0.5	S	<=0.25	S	<=0.25	S	<=2	S	<=2	S
2245STDY5562322	0672_00	0672_00	11511_7#28	ACTIVE_BACTERIAL_CORE_SURVEILLANCE	UNITED STATES	GEORGIA	CDC	1999	BACTEREMIA	BLOOD	ERR425382	ERS322362	3065	11	18C	<=0.03	S	S	<=0.03	S	<=0.06	S	<=0.06	S	S	<=0.5	S	S	<=0.5	S	0.06	S	0.06	S	<=1	S	<=2	S	NEG	2	I	<=0.25	S	<=0.25	S	FLAG	FLAG	<=2	S
2245STDY5562298	0811_00	0811_00	11511_7#15	ACTIVE_BACTERIAL_CORE_SURVEILLANCE	UNITED STATES	GEORGIA	CDC	1999	BACTEREMIA	BLOOD	ERR425369	ERS322338	16	18	14	4	R	I	8	R	1	R	1	I	S	2	R	I	>2	R	8	R	0.06	S	<=1	S	<=2	S	NEG	>=4	R	<=0.25	S	<=0.25	S	<=2	S	<=2	S
2245STDY5562496	0814_00	0814_00	11826_1#78	ACTIVE_BACTERIAL_CORE_SURVEILLANCE	UNITED STATES	GEORGIA	CDC	1999	BACTEREMIA	BLOOD	ERR449262	ERS322530	9557	27	4	<=0.03	S	S	<=0.03	S	<=0.06	S	<=0.06	S	S	<=0.5	S	S	<=0.5	S	0.06	S	0.06	S	<=1	S	<=2	S	NEG	2	I	>8	R	>=1	R	<=2	S	<=2	S
2245STDY5486300	0867_99	0867_99	9950_2#12	ACTIVE_BACTERIAL_CORE_SURVEILLANCE	UNITED STATES	MARYLAND	CDC	1998	BACTEREMIA	BLOOD	ERR326427	ERS221787	439	7	23F	<=0.03	S	S	<=0.03	S	<=0.06	S	<=0.06	S	S	<=0.5	S	S	<=0.5	S	0.06	S	0.06	S	<=1	S	<=2	S	NEG	>=4	R	<=0.25	S	<=0.25	S	<=2	S	<=2	S
2245STDY5562454	0869_99	0869_99	11893_8#5	ACTIVE_BACTERIAL_CORE_SURVEILLANCE	UNITED STATES	MARYLAND	CDC	1998	BACTEREMIA	BLOOD	ERR460193	ERS322488	439	7	23F	<=0.03	S	S	<=0.03	S	<=0.06	S	<=0.06	S	S	<=0.5	S	S	<=0.5	S	0.06	S	0.06	S	<=1	S	<=2	S	NEG	>=4	R	<=0.25	S	<=0.25	S	<=2	S	<=2	S
2245STDY5562455	0880_99	0880_99	11826_1#44	ACTIVE_BACTERIAL_CORE_SURVEILLANCE	UNITED STATES	MARYLAND	CDC	1998	BACTEREMIA	BLOOD	ERR449230	ERS322489	162	6	9V	<=0.03	S	S	<=0.03	S	<=0.06	S	<=0.06	S	S	<=0.5	S	S	<=0.5	S	0.06	S	0.06	S	<=1	S	<=2	S	NEG	0.5	S	<=0.25	S	<=0.25	S	<=2	S	<=2	S
2245STDY5562457	0892_99	0892_99	11826_1#46	ACTIVE_BACTERIAL_CORE_SURVEILLANCE	UNITED STATES	MARYLAND	CDC	1998	BACTEREMIA	BLOOD	ERR449232	ERS322491	1269	6	9V	<=0.03	S	S	<=0.03	S	<=0.06	S	<=0.06	S	S	<=0.5	S	S	<=0.5	S	0.06	S	0.06	S	<=1	S	<=2	S	NEG	0.5	S	<=0.25	S	<=0.25	S	<=2	S	<=2	S
2245STDY5562347	0939_00	0939_00	11822_1#51	ACTIVE_BACTERIAL_CORE_SURVEILLANCE	UNITED STATES	CONNECTICUT	CDC	1999	BACTEREMIA	BLOOD	ERR449140	ERS322384	13	18	14	4	R	I	8	R	1	R	1	I	S	2	R	I	>2	R	8	R	0.06	S	<=1	S	<=2	S	NEG	>=4	R	<=0.25	S	<=0.25	S	<=2	S	<=2	S
2245STDY5562349	0942_00	0942_00	11822_1#53	ACTIVE_BACTERIAL_CORE_SURVEILLANCE	UNITED STATES	CONNECTICUT	CDC	1999	BACTEREMIA	BLOOD	ERR449142	ERS322386	13	18	14	4	R	I	8	R	1	R	1	I	S	2	R	I	>2	R	8	R	0.06	S	<=1	S	<=2	S	NEG	>=4	R	<=0.25	S	<=0.25	S	<=2	S	<=2	S
2245STDY5562638	0977_99	0977_99	11657_2#80	ACTIVE_BACTERIAL_CORE_SURVEILLANCE	UNITED STATES	MARYLAND	CDC	1998	BACTEREMIA	BLOOD	ERR433594	ERS322667	13	18	14	4	R	I	8	R	1	R	1	I	S	2	R	I	>2	R	8	R	0.06	S	<=1	S	<=2	S	NEG	>=4	R	<=0.25	S	<=0.25	S	<=2	S	<=2	S
2245STDY5609106	1000_99	1000_99	11657_4#44	ACTIVE_BACTERIAL_CORE_SURVEILLANCE	UNITED STATES	MARYLAND	CDC	1998	BACTEREMIA	BLOOD	ERR433642	ERS356476	659	135	16F	<=0.03	S	S	<=0.03	S	<=0.06	S	<=0.06	S	S	<=0.5	S	S	<=0.5	S	0.06	S	0.06	S	<=1	S	<=2	S	NEG	0.5	S	<=0.25	S	<=0.25	S	<=2	S	<=2	S
2245STDY5562516	1008_00	1008_00	11657_2#4	ACTIVE_BACTERIAL_CORE_SURVEILLANCE	UNITED STATES	GEORGIA	CDC	1999	BACTEREMIA	BLOOD	ERR433525	ERS322550	220	32	12F	<=0.03	S	S	<=0.03	S	<=0.06	S	<=0.06	S	S	<=0.5	S	S	<=0.5	S	0.06	S	0.06	S	<=1	S	<=2	S	NEG	0.5	S	<=0.25	S	<=0.25	S	<=2	S	<=2	S
2245STDY5562334	1018_00	1018_00	11511_7#34	ACTIVE_BACTERIAL_CORE_SURVEILLANCE	UNITED STATES	GEORGIA	CDC	1999	BACTEREMIA	BLOOD	ERR425387	ERS322371	13	18	14	4	R	I	8	R	1	R	1	I	S	2	R	I	>2	R	8	R	0.06	S	<=1	S	<=2	S	NEG	>=4	R	<=0.25	S	<=0.25	S	<=2	S	<=2	S
2245STDY5609105	1049_99	1049_99	11679_1#46	ACTIVE_BACTERIAL_CORE_SURVEILLANCE	UNITED STATES	MARYLAND	CDC	1998	BACTEREMIA	BLOOD	ERR434010	ERS356475	632	16	9N	<=0.03	S	S	<=0.03	S	<=0.06	S	<=0.06	S	S	<=0.5	S	S	<=0.5	S	0.06	S	0.06	S	<=1	S	<=2	S	NEG	0.5	S	<=0.25	S	<=0.25	S	<=2	S	<=2	S
2245STDY5562278	1051_98	1051_98	11511_7#9	ACTIVE_BACTERIAL_CORE_SURVEILLANCE	UNITED STATES	GEORGIA	CDC	1998	BACTEREMIA	BLOOD	ERR425363	ERS322318	227	31	1	<=0.03	S	S	<=0.03	S	<=0.06	S	<=0.06	S	S	<=0.5	S	S	<=0.5	S	0.06	S	0.06	S	<=1	S	<=2	S	NEG	0.5	S	<=0.25	S	<=0.25	S	<=2	S	<=2	S
2245STDY5562521	1068_00	1068_00	11657_2#9	ACTIVE_BACTERIAL_CORE_SURVEILLANCE	UNITED STATES	GEORGIA	CDC	1999	BACTEREMIA	BLOOD	ERR433529	ERS322555	1339	97	6A	2	R	S	2	S	0.5	I	1	I	S	1	I	S	>2	R	8	R	0.06	S	<=1	S	<=2	S	NEG	>=4	R	<=0.25	S	<=0.25	S	<=2	S	<=2	S
2245STDY5486365	1081_00	1081_00	9950_2#68	ACTIVE_BACTERIAL_CORE_SURVEILLANCE	UNITED STATES	MARYLAND	CDC	1999	BACTEREMIA	BLOOD	ERR326483	ERS221852	622	18	14	<=0.03	S	S	<=0.03	S	<=0.06	S	0.12	S	S	<=0.5	S	S	<=0.5	S	8	R	0.06	S	<=1	S	<=2	S	NEG	>=4	R	<=0.25	S	<=0.25	S	<=2	S	<=2	S
2245STDY5562426	1085_00	1085_00	11826_1#19	ACTIVE_BACTERIAL_CORE_SURVEILLANCE	UNITED STATES	MARYLAND	CDC	1999	BACTEREMIA	BLOOD	ERR449207	ERS322463	124	39	14	<=0.03	S	S	<=0.03	S	<=0.06	S	<=0.06	S	S	<=0.5	S	S	<=0.5	S	0.06	S	0.06	S	<=1	S	<=2	S	NEG	0.5	S	<=0.25	S	<=0.25	S	<=2	S	<=2	S
2245STDY5562401	1116_99	1116_99	11511_7#87	ACTIVE_BACTERIAL_CORE_SURVEILLANCE	UNITED STATES	GEORGIA	CDC	1998	BACTEREMIA	BLOOD	ERR425439	ERS322438	162	6	9V	<=0.03	S	S	<=0.03	S	<=0.06	S	<=0.06	S	S	<=0.5	S	S	<=0.5	S	0.06	S	0.06	S	<=1	S	<=2	S	NEG	>=4	R	<=0.25	S	<=0.25	S	<=2	S	<=2	S
2245STDY5562645	1131_00	1131_00	11657_2#86	ACTIVE_BACTERIAL_CORE_SURVEILLANCE	UNITED STATES	GEORGIA	CDC	1999	BACTEREMIA	BLOOD	ERR433600	ERS322674	9453	29	6A	<=0.03	S	S	<=0.03	S	<=0.06	S	<=0.06	S	S	<=0.5	S	S	<=0.5	S	0.06	S	0.06	S	<=1	S	<=2	S	NEG	0.5	S	<=0.25	S	<=0.25	S	<=2	S	<=2	S
2245STDY5486373	1246_00	1246_00	9950_2#76	ACTIVE_BACTERIAL_CORE_SURVEILLANCE	UNITED STATES	GEORGIA	CDC	1999	BACTEREMIA	BLOOD	ERR326491	ERS221860	7505	50	18C	<=0.03	S	S	<=0.03	S	<=0.06	S	<=0.06	S	S	<=0.5	S	S	<=0.5	S	0.06	S	0.06	S	<=1	S	<=2	S	NEG	2	I	<=0.25	S	<=0.25	S	<=2	S	<=2	S
2245STDY5562647	1265_00	1265_00	11657_1#70	ACTIVE_BACTERIAL_CORE_SURVEILLANCE	UNITED STATES	MARYLAND	CDC	1999	BACTEREMIA	BLOOD	ERR433501	ERS322676	156	6	9V	2	R	S	2	S	0.5	I	1	I	S	1	I	S	>2	R	0.06	S	0.06	S	<=1	S	<=2	S	NEG	>=4	R	<=0.25	S	<=0.25	S	<=2	S	<=2	S
2245STDY5562277	1288_98	1288_98	11893_8#1	ACTIVE_BACTERIAL_CORE_SURVEILLANCE	UNITED STATES	GEORGIA	CDC	1998	BACTEREMIA	BLOOD	ERR460189	ERS322317	12699	18	14	4	R	I	8	R	1	R	1	I	S	2	R	I	>2	R	8	R	0.06	S	<=1	S	<=2	S	NEG	>=4	R	<=0.25	S	<=0.25	S	<=2	S	<=2	S
2245STDY5562399	1327_99	1327_99	11511_7#85	ACTIVE_BACTERIAL_CORE_SURVEILLANCE	UNITED STATES	GEORGIA	CDC	1998	BACTEREMIA	BLOOD	ERR425437	ERS322436	695	27	4	<=0.03	S	S	<=0.03	S	<=0.06	S	<=0.06	S	S	<=0.5	S	S	<=0.5	S	0.06	S	0.06	S	<=1	S	<=2	S	NEG	2	I	<=0.25	S	<=0.25	S	<=2	S	<=2	S
2245STDY5486381	1343_00	1343_00	9950_2#84	ACTIVE_BACTERIAL_CORE_SURVEILLANCE	UNITED STATES	NEW YORK	CDC	1999	BACTEREMIA	BLOOD	ERR326499	ERS221868	12851	18	14	0.5	R	S	0.5	S	0.12	S	0.25	S	S	1	I	S	2	R	8	R	0.06	S	<=1	S	<=2	S	NEG	2	I	>8	R	>=1	R	<=2	S	>=8	R
2245STDY5486230	1361_00	1361_00	9950_1#42	ACTIVE_BACTERIAL_CORE_SURVEILLANCE	UNITED STATES	NEW YORK	CDC	1999	BACTEREMIA	BLOOD	ERR326366	ERS221720	517		9N	<=0.03	S	S	<=0.03	S	<=0.06	S	<=0.06	S	S	<=0.5	S	S	<=0.5	S	>32	R	1	R	<=1	S	<=2	S	POS	0.5	S	<=0.25	S	<=0.25	S	<=2	S	<=2	S
2245STDY5609113	1368_00	1368_00	11657_8#69	ACTIVE_BACTERIAL_CORE_SURVEILLANCE	UNITED STATES	NEW YORK	CDC	1999	BACTEREMIA	BLOOD	ERR433760	ERS356483	13	18	14	<=0.03	S	S	<=0.03	S	<=0.06	S	0.12	S	S	<=0.5	S	S	<=0.5	S	8	R	0.06	S	<=1	S	<=2	S	NEG	>=4	R	<=0.25	S	<=0.25	S	<=2	S	<=2	S
2245STDY5609114	1373_00	1373_00	11511_8#51	ACTIVE_BACTERIAL_CORE_SURVEILLANCE	UNITED STATES	NEW YORK	CDC	1999	BACTEREMIA	BLOOD	ERR425487	ERS356484	124	39	14	<=0.03	S	S	<=0.03	S	<=0.06	S	<=0.06	S	S	<=0.5	S	S	<=0.5	S	0.06	S	0.06	S	<=1	S	<=2	S	NEG	0.5	S	<=0.25	S	<=0.25	S	<=2	S	<=2	S
2245STDY5609115	1396_00	1396_00	11658_2#58	ACTIVE_BACTERIAL_CORE_SURVEILLANCE	UNITED STATES	NEW YORK	CDC	1999	BACTEREMIA	BLOOD	ERR433909	ERS356485	227	31	1	<=0.03	S	S	<=0.03	S	<=0.06	S	<=0.06	S	S	<=0.5	S	S	<=0.5	S	0.06	S	0.06	S	<=1	S	<=2	S	NEG	0.5	S	<=0.25	S	<=0.25	S	<=2	S	<=2	S
2245STDY5486327	1460_00	1460_00	9950_2#31	ACTIVE_BACTERIAL_CORE_SURVEILLANCE	UNITED STATES	NEW YORK	CDC	1999	BACTEREMIA	BLOOD	ERR326446	ERS221814	695	27	4	<=0.03	S	S	<=0.03	S	<=0.06	S	<=0.06	S	S	<=0.5	S	S	<=0.5	S	0.06	S	0.06	S	<=1	S	<=2	S	NEG	0.5	S	<=0.25	S	<=0.25	S	<=2	S	<=2	S
2245STDY5699151	1461_00	1461_00	12291_5#35	ACTIVE_BACTERIAL_CORE_SURVEILLANCE	UNITED STATES	NEW YORK	CDC	1999	BACTEREMIA	BLOOD	ERR505837	ERS394251	180	12	3	<=0.03	S	S	<=0.03	S	<=0.06	S	<=0.06	S	S	<=0.5	S	S	<=0.5	S	0.06	S	0.06	S	<=1	S	<=2	S	NEG	0.5	S	<=0.25	S	<=0.25	S	<=2	S	<=2	S
2245STDY5562434	1464_00	1464_00	11826_1#23	ACTIVE_BACTERIAL_CORE_SURVEILLANCE	UNITED STATES	NEW YORK	CDC	1999	BACTEREMIA	BLOOD	ERR449211	ERS322468	452	75	35B	<=0.03	S	S	<=0.03	S	<=0.06	S	<=0.06	S	S	<=0.5	S	S	<=0.5	S	0.06	S	0.06	S	<=1	S	<=2	S	NEG	0.5	S	<=0.25	S	<=0.25	S	<=2	S	<=2	S
2245STDY5562292	1506_98	1506_98	11822_1#28	ACTIVE_BACTERIAL_CORE_SURVEILLANCE	UNITED STATES	GEORGIA	CDC	1998	BACTEREMIA	BLOOD	ERR449119	ERS322332	9917	39	14	<=0.03	S	S	<=0.03	S	<=0.06	S	<=0.06	S	S	<=0.5	S	S	<=0.5	S	8	R	0.06	S	<=1	S	<=2	S	NEG	0.5	S	<=0.25	S	<=0.25	S	<=2	S	<=2	S
2245STDY5562435	1533_00	1533_00	11826_1#24	ACTIVE_BACTERIAL_CORE_SURVEILLANCE	UNITED STATES	GEORGIA	CDC	1999	BACTEREMIA	BLOOD	ERR449212	ERS322469	220	32	12F	<=0.03	S	S	<=0.03	S	<=0.06	S	<=0.06	S	S	<=0.5	S	S	<=0.5	S	0.06	S	0.06	S	<=1	S	<=2	S	NEG	0.5	S	<=0.25	S	<=0.25	S	<=2	S	<=2	S
2245STDY5486343	1538_00	1538_00	9950_2#46	ACTIVE_BACTERIAL_CORE_SURVEILLANCE	UNITED STATES	GEORGIA	CDC	1999	BACTEREMIA	BLOOD	ERR326461	ERS221830	1203	48	19F	0.5	R	S	0.12	S	0.12	S	0.12	S	S	<=0.5	S	S	<=0.5	S	>32	R	>2	R	<=1	S	<=2	S	POS	0.5	S	>8	R	>=1	R	<=2	S	<=2	S
2245STDY5486367	1556_00	1556_00	9950_2#70	ACTIVE_BACTERIAL_CORE_SURVEILLANCE	UNITED STATES	GEORGIA	CDC	1999	BACTEREMIA	BLOOD	ERR326485	ERS221854	13	18	14	4	R	I	8	R	1	R	1	I	S	2	R	I	>2	R	8	R	0.06	S	<=1	S	<=2	S	NEG	>=4	R	<=0.25	S	<=0.25	S	<=2	S	<=2	S
2245STDY5562250	1568_99	1568_99	11822_1#2	ACTIVE_BACTERIAL_CORE_SURVEILLANCE	UNITED STATES	TENNESSEE	CDC	1998	BACTEREMIA	BLOOD	ERR449094	ERS322290	180	12	3	<=0.03	S	S	<=0.03	S	<=0.06	S	<=0.06	S	S	<=0.5	S	S	<=0.5	S	0.06	S	0.06	S	<=1	S	<=2	S	NEG	0.5	S	<=0.25	S	<=0.25	S	<=2	S	<=2	S
2245STDY5562395	1652_99	1652_99	11511_7#81	ACTIVE_BACTERIAL_CORE_SURVEILLANCE	UNITED STATES	GEORGIA	CDC	1998	BACTEREMIA	BLOOD	ERR425433	ERS322432	244	27	4	<=0.03	S	S	<=0.03	S	<=0.06	S	<=0.06	S	S	<=0.5	S	S	<=0.5	S	0.06	S	0.06	S	<=1	S	<=2	S	NEG	0.5	S	<=0.25	S	<=0.25	S	<=2	S	<=2	S
2245STDY5562653	1833_00	1833_00	11657_1#75	ACTIVE_BACTERIAL_CORE_SURVEILLANCE	UNITED STATES	GEORGIA	CDC	1999	BACTEREMIA	BLOOD	ERR433506	ERS322682	9899	18	14	4	R	I	8	R	1	R	1	I	S	2	R	I	>2	R	8	R	0.06	S	<=1	S	<=2	S	NEG	>=4	R	<=0.25	S	<=0.25	S	<=2	S	<=2	S
2245STDY5562493	1839_98	1839_98	11826_1#77	ACTIVE_BACTERIAL_CORE_SURVEILLANCE	UNITED STATES	GEORGIA	CDC	1998	BACTEREMIA	BLOOD	ERR449261	ERS322527	199	4	15B/15C	<=0.03	S	S	<=0.03	S	<=0.06	S	<=0.06	S	S	<=0.5	S	S	<=0.5	S	0.06	S	0.06	S	<=1	S	<=2	S	NEG	0.5	S	<=0.25	S	<=0.25	S	<=2	S	<=2	S
2245STDY5562655	1868_00	1868_00	11657_1#77	ACTIVE_BACTERIAL_CORE_SURVEILLANCE	UNITED STATES	NEW YORK	CDC	1999	BACTEREMIA	BLOOD	ERR433508	ERS322684	570	46	16F	<=0.03	S	S	<=0.03	S	<=0.06	S	<=0.06	S	S	<=0.5	S	S	<=0.5	S	0.06	S	0.06	S	<=1	S	<=2	S	NEG	0.5	S	>8	R	>=1	R	<=2	S	<=2	S
2245STDY5562352	1873_00	1873_00	11511_7#41	ACTIVE_BACTERIAL_CORE_SURVEILLANCE	UNITED STATES	NEW YORK	CDC	1999	BACTEREMIA	BLOOD	ERR425394	ERS322389	376	97	6A	2	R	S	1	S	0.5	I	0.5	S	S	1	I	S	>2	R	8	R	0.06	S	<=1	S	<=2	S	NEG	>=4	R	<=0.25	S	<=0.25	S	<=2	S	<=2	S
2245STDY5562365	1898_00	1898_00	11511_7#53	ACTIVE_BACTERIAL_CORE_SURVEILLANCE	UNITED STATES	NEW YORK	CDC	1999	BACTEREMIA	BLOOD	ERR425405	ERS322402	124	39	14	<=0.03	S	S	<=0.03	S	<=0.06	S	<=0.06	S	S	<=0.5	S	S	<=0.5	S	0.06	S	0.06	S	<=1	S	<=2	S	NEG	>=4	R	<=0.25	S	<=0.25	S	<=2	S	<=2	S
2245STDY5699156	1971_99	1971_99	12291_5#40	ACTIVE_BACTERIAL_CORE_SURVEILLANCE	UNITED STATES	GEORGIA	CDC	1998	BACTEREMIA	BLOOD	ERR505842	ERS394256	230	10	14	0.5	R	S	0.25	S	0.25	S	0.25	S	S	<=0.5	S	S	<=0.5	S	>32	R	>2	R	<=1	S	<=2	S	POS	>=4	R	>8	R	>=1	R	<=2	S	<=2	S
2245STDY5486247	2003000312	2003000312	9950_1#59	ACTIVE_BACTERIAL_CORE_SURVEILLANCE	UNITED STATES	MINNESOTA	CDC	2003	BACTEREMIA	BLOOD	ERR326383	ERS221737	9556	326	10A	<=0.03	S	S	<=0.03	S	<=0.06	S	<=0.06	S	S	<=0.5	S	S	<=0.5	S	0.06	S	0.06	S	<=1	S	<=2	S	NEG	0.5	S	<=0.25	S	<=0.25	S	<=2	S	<=2	S
2245STDY5609026	2009206439	2009206439	11511_8#34	ACTIVE_BACTERIAL_CORE_SURVEILLANCE	UNITED STATES	MINNESOTA	CDC	2009	BACTEREMIA	BLOOD	ERR425471	ERS356390	100	3	33F	<=0.03	S	S	<=0.03	S	<=0.06	S	<=0.06	S	S	<=0.5	S	S	<=0.5	S	8	R	0.06	S	<=1	S	<=2	S	NEG	2	I	<=0.25	S	<=0.25	S	<=2	S	<=2	S
2245STDY5609009	2009209140	2009209140	11658_8#3	ACTIVE_BACTERIAL_CORE_SURVEILLANCE	UNITED STATES	GEORGIA	CDC	2009	BACTEREMIA	BLOOD	ERR433944	ERS356373	2705	3	33F	<=0.03	S	S	<=0.03	S	<=0.06	S	<=0.06	S	S	<=0.5	S	S	<=0.5	S	8	R	0.06	S	<=1	S	<=2	S	NEG	2	I	<=0.25	S	<=0.25	S	<=2	S	<=2	S
2245STDY5608900	2009209148	2009209148	11657_8#4	ACTIVE_BACTERIAL_CORE_SURVEILLANCE	UNITED STATES	GEORGIA	CDC	2009	BACTEREMIA	BLOOD	ERR433698	ERS356265	320	1	19A	4	R	I	8	R	1	R	2	R	I	2	R	I	>2	R	>32	R	>2	R	<=1	S	<=2	S	POS	>=4	R	>8	R	>=1	R	<=2	S	<=2	S
2245STDY5609004	2009210864	2009210864	11657_4#27	ACTIVE_BACTERIAL_CORE_SURVEILLANCE	UNITED STATES	MINNESOTA	CDC	2009	BACTEREMIA	BLOOD	ERR433627	ERS356368	320	1	19A	4	R	I	8	R	1	R	2	R	I	2	R	I	>2	R	>32	R	>2	R	<=1	S	<=2	S	POS	>=4	R	>8	R	>=1	R	<=2	S	<=2	S
2245STDY5609011	2009210878	2009210878	11511_8#27	ACTIVE_BACTERIAL_CORE_SURVEILLANCE	UNITED STATES	MINNESOTA	CDC	2009	BACTEREMIA	BLOOD	ERR425465	ERS356375	433	19	22F	<=0.03	S	S	<=0.03	S	<=0.06	S	<=0.06	S	S	<=0.5	S	S	<=0.5	S	0.06	S	0.06	S	<=1	S	<=2	S	NEG	0.5	S	<=0.25	S	<=0.25	S	<=2	S	<=2	S
2245STDY5609018	2009210924	2009210924	11511_8#29	ACTIVE_BACTERIAL_CORE_SURVEILLANCE	UNITED STATES	MINNESOTA	CDC	2009	BACTEREMIA	BLOOD	ERR425467	ERS356382	433	19	22F	<=0.03	S	S	<=0.03	S	<=0.06	S	<=0.06	S	S	<=0.5	S	S	<=0.5	S	0.06	S	0.06	S	<=1	S	<=2	S	NEG	0.5	S	<=0.25	S	<=0.25	S	<=2	S	<=2	S
2245STDY5609019	2009210929	2009210929	11511_8#30	ACTIVE_BACTERIAL_CORE_SURVEILLANCE	UNITED STATES	MINNESOTA	CDC	2009	BACTEREMIA	BLOOD	ERR425468	ERS356383	393	38	38	<=0.03	S	S	<=0.03	S	<=0.06	S	<=0.06	S	S	<=0.5	S	S	<=0.5	S	0.06	S	0.06	S	<=1	S	<=2	S	NEG	0.5	S	<=0.25	S	<=0.25	S	<=2	S	<=2	S
2245STDY5609020	2009210936	2009210936	11893_8#15	ACTIVE_BACTERIAL_CORE_SURVEILLANCE	UNITED STATES	MINNESOTA	CDC	2009	BACTEREMIA	BLOOD	ERR460201	ERS356384	320	1	19A	4	R	I	8	R	1	R	2	R	I	2	R	I	>2	R	>32	R	>2	R	<=1	S	<=2	S	POS	>=4	R	>8	R	>=1	R	<=2	S	<=2	S
2245STDY5609021	2009210937	2009210937	11657_8#17	ACTIVE_BACTERIAL_CORE_SURVEILLANCE	UNITED STATES	MINNESOTA	CDC	2009	BACTEREMIA	BLOOD	ERR433710	ERS356385	667	4	19A	<=0.03	S	S	<=0.03	S	<=0.06	S	<=0.06	S	S	<=0.5	S	S	<=0.5	S	0.06	S	0.06	S	<=1	S	<=2	S	NEG	0.5	S	<=0.25	S	<=0.25	S	<=2	S	<=2	S
2245STDY5609061	2009211109	2009211109	11511_8#46	ACTIVE_BACTERIAL_CORE_SURVEILLANCE	UNITED STATES	NEW YORK	CDC	2009	BACTEREMIA	BLOOD	ERR425482	ERS356432	695	27	19A	0.12	R	S	0.06	S	<=0.06	S	<=0.06	S	S	<=0.5	S	S	<=0.5	S	0.06	S	0.06	S	<=1	S	<=2	S	NEG	0.5	S	<=0.25	S	<=0.25	S	<=2	S	<=2	S
2245STDY5609066	2009211232	2009211232	11657_8#20	ACTIVE_BACTERIAL_CORE_SURVEILLANCE	UNITED STATES	TENNESSEE	CDC	2009	BACTEREMIA	BLOOD	ERR433713	ERS356437	1092	76	6C	2	R	S	2	S	0.5	I	1	I	S	<=0.5	S	S	>2	R	0.06	S	0.06	S	<=1	S	<=2	S	NEG	>=4	R	<=0.25	S	<=0.25	S	<=2	S	<=2	S
2245STDY5609091	2009212842	2009212842	11658_2#62	ACTIVE_BACTERIAL_CORE_SURVEILLANCE	UNITED STATES	OREGON	CDC	2009	BACTEREMIA	BLOOD	ERR433912	ERS356461	433	19	22F	<=0.03	S	S	<=0.03	S	<=0.06	S	<=0.06	S	S	<=0.5	S	S	<=0.5	S	0.06	S	0.06	S	<=1	S	<=2	S	NEG	0.5	S	<=0.25	S	<=0.25	S	<=2	S	<=2	S
2245STDY5609098	2009214014	2009214014	11679_1#45	ACTIVE_BACTERIAL_CORE_SURVEILLANCE	UNITED STATES	MARYLAND	CDC	2009	BACTEREMIA	BLOOD	ERR434009	ERS356468	162	6	15B/15C	<=0.03	S	S	<=0.03	S	<=0.06	S	<=0.06	S	S	<=0.5	S	S	<=0.5	S	0.06	S	0.06	S	<=1	S	<=2	S	NEG	0.5	S	<=0.25	S	<=0.25	S	<=2	S	<=2	S
2245STDY5609135	2009214077	2009214077	11658_2#56	ACTIVE_BACTERIAL_CORE_SURVEILLANCE	UNITED STATES	CALIFORNIA	CDC	2009	BACTEREMIA	BLOOD	ERR433907	ERS356505	433	19	22F	<=0.03	S	S	<=0.03	S	<=0.06	S	<=0.06	S	S	<=0.5	S	S	<=0.5	S	0.06	S	0.06	S	<=1	S	<=2	S	NEG	0.5	S	<=0.25	S	<=0.25	S	<=2	S	<=2	S
2245STDY5609052	2009214185	2009214185	11658_2#75	ACTIVE_BACTERIAL_CORE_SURVEILLANCE	UNITED STATES	MINNESOTA	CDC	2009	BACTEREMIA	BLOOD	ERR433920	ERS356423	271	1	19F	4	R	I	8	R	1	R	1	I	S	1	I	S	>2	R	>32	R	>2	R	<=1	S	<=2	S	POS	>=4	R	>8	R	>=1	R	<=2	S	<=2	S
2245STDY5486223	2009214597	2009214597	9950_1#35	ACTIVE_BACTERIAL_CORE_SURVEILLANCE	UNITED STATES	MINNESOTA	CDC	2002	BACTEREMIA	BLOOD	ERR326359	ERS221713	72	16	24F	<=0.03	S	S	<=0.03	S	<=0.06	S	<=0.06	S	S	<=0.5	S	S	<=0.5	S	>32	R	1	R	<=1	S	<=2	S	POS	0.5	S	<=0.25	S	<=0.25	S	<=2	S	<=2	S
2245STDY5609146	2009215718	2009215718	11658_2#54	ACTIVE_BACTERIAL_CORE_SURVEILLANCE	UNITED STATES	TENNESSEE	CDC	2009	BACTEREMIA	BLOOD	ERR433905	ERS356516	7314	19	22F	<=0.03	S	S	<=0.03	S	<=0.06	S	<=0.06	S	S	<=0.5	S	S	<=0.5	S	8	R	0.06	S	<=1	S	<=2	S	NEG	0.5	S	<=0.25	S	<=0.25	S	<=2	S	<=2	S
2245STDY5608920	2009215863	2009215863	11658_2#95	ACTIVE_BACTERIAL_CORE_SURVEILLANCE	UNITED STATES	TENNESSEE	CDC	2009	BACTEREMIA	BLOOD	ERR433940	ERS356285	3776	55	12F	<=0.03	S	S	<=0.03	S	<=0.06	S	<=0.06	S	S	<=0.5	S	S	<=0.5	S	0.06	S	0.06	S	<=1	S	<=2	S	NEG	0.5	S	<=0.25	S	<=0.25	S	<=2	S	<=2	S
2245STDY5608921	2009215889	2009215889	11893_8#12	ACTIVE_BACTERIAL_CORE_SURVEILLANCE	UNITED STATES	OREGON	CDC	2009	BACTEREMIA	BLOOD	ERR460198	ERS356286	4666	32	9N	<=0.03	S	S	<=0.03	S	<=0.06	S	<=0.06	S	S	<=0.5	S	S	<=0.5	S	0.06	S	0.06	S	<=1	S	<=2	S	NEG	0.5	S	<=0.25	S	<=0.25	S	<=2	S	<=2	S
2245STDY5608922	2009215893	2009215893	11657_4#4	ACTIVE_BACTERIAL_CORE_SURVEILLANCE	UNITED STATES	OREGON	CDC	2009	BACTEREMIA	BLOOD	ERR433605	ERS356287	191	15	7F	<=0.03	S	S	<=0.03	S	<=0.06	S	<=0.06	S	S	<=0.5	S	S	<=0.5	S	0.06	S	0.06	S	<=1	S	<=2	S	NEG	0.5	S	<=0.25	S	<=0.25	S	<=2	S	<=2	S
2245STDY5609152	2009215894	2009215894	11657_4#53	ACTIVE_BACTERIAL_CORE_SURVEILLANCE	UNITED STATES	NEW YORK	CDC	2009	BACTEREMIA	BLOOD	ERR433651	ERS356522	320	1	19A	4	R	I	8	R	1	R	2	R	I	2	R	I	>2	R	>32	R	>2	R	<=1	S	<=2	S	POS	>=4	R	>8	R	>=1	R	<=2	S	<=2	S
2245STDY5608926	2009216796	2009216796	11511_8#9	ACTIVE_BACTERIAL_CORE_SURVEILLANCE	UNITED STATES	CONNECTICUT	CDC	2009	BACTEREMIA	BLOOD	ERR425447	ERS356291	320	1	19A	8	R	R	8	R	1	R	8	R	R	4	R	R	>2	R	>32	R	>2	R	<=1	S	<=2	S	POS	>=4	R	>8	R	>=1	R	<=2	S	<=2	S
2245STDY5609171	2009217627	2009217627	11511_8#62	ACTIVE_BACTERIAL_CORE_SURVEILLANCE	UNITED STATES	MINNESOTA	CDC	2009	BACTEREMIA	BLOOD	ERR425498	ERS356541	191	15	7F	<=0.03	S	S	<=0.03	S	<=0.06	S	<=0.06	S	S	<=0.5	S	S	<=0.5	S	0.06	S	0.06	S	<=1	S	<=2	S	NEG	0.5	S	<=0.25	S	<=0.25	S	<=2	S	<=2	S
2245STDY5609172	2009217629	2009217629	11657_4#59	ACTIVE_BACTERIAL_CORE_SURVEILLANCE	UNITED STATES	MINNESOTA	CDC	2009	BACTEREMIA	BLOOD	ERR433657	ERS356542	191	15	7F	<=0.03	S	S	<=0.03	S	<=0.06	S	<=0.06	S	S	<=0.5	S	S	<=0.5	S	0.06	S	0.06	S	<=1	S	<=2	S	NEG	0.5	S	<=0.25	S	<=0.25	S	<=2	S	<=2	S
2245STDY5608930	2009217662	2009217662	11679_1#10	ACTIVE_BACTERIAL_CORE_SURVEILLANCE	UNITED STATES	MINNESOTA	CDC	2009	BACTEREMIA	BLOOD	ERR433974	ERS356295	199	4	19A	0.12	R	S	0.12	S	<=0.06	S	<=0.06	S	S	<=0.5	S	S	<=0.5	S	8	R	0.06	S	<=1	S	<=2	S	NEG	>=4	R	<=0.25	S	<=0.25	S	<=2	S	<=2	S
2245STDY5609173	2009217663	2009217663	11658_2#49	ACTIVE_BACTERIAL_CORE_SURVEILLANCE	UNITED STATES	MINNESOTA	CDC	2009	BACTEREMIA	BLOOD	ERR433901	ERS356543	199	4	19A	0.12	R	S	0.12	S	<=0.06	S	<=0.06	S	S	<=0.5	S	S	<=0.5	S	0.06	S	0.06	S	<=1	S	<=2	S	NEG	>=4	R	<=0.25	S	<=0.25	S	<=2	S	<=2	S
2245STDY5608937	2009218376	2009218376	11657_4#9	ACTIVE_BACTERIAL_CORE_SURVEILLANCE	UNITED STATES	TENNESSEE	CDC	2009	BACTEREMIA	BLOOD	ERR433609	ERS356302	156	6	9V	2	R	S	2	S	0.5	I	1	I	S	1	I	S	>2	R	8	R	0.06	S	<=1	S	<=2	S	NEG	>=4	R	<=0.25	S	<=0.25	S	<=2	S	<=2	S
2245STDY5609170	2009219216	2009219216	11511_8#61	ACTIVE_BACTERIAL_CORE_SURVEILLANCE	UNITED STATES	GEORGIA	CDC	2009	BACTEREMIA	BLOOD	ERR425497	ERS356540	4026	6	19A	4	R	I	8	R	1	R	1	I	S	1	I	S	>2	R	8	R	0.06	S	<=1	S	<=2	S	NEG	>=4	R	<=0.25	S	<=0.25	S	<=2	S	<=2	S
2245STDY5608927	2009219217	2009219217	11657_4#5	ACTIVE_BACTERIAL_CORE_SURVEILLANCE	UNITED STATES	GEORGIA	CDC	2009	BACTEREMIA	BLOOD	ERR433606	ERS356292	433	19	22F	<=0.03	S	S	<=0.03	S	<=0.06	S	<=0.06	S	S	<=0.5	S	S	<=0.5	S	0.06	S	0.06	S	<=1	S	<=2	S	NEG	0.5	S	<=0.25	S	<=0.25	S	<=2	S	<=2	S
2245STDY5486306	2009219568	2009219568	9950_2#15	ACTIVE_BACTERIAL_CORE_SURVEILLANCE	UNITED STATES	MINNESOTA	CDC	1999	BACTEREMIA	BLOOD	ERR326430	ERS221793	218	32	12F	<=0.03	S	S	<=0.03	S	<=0.06	S	<=0.06	S	S	<=0.5	S	S	<=0.5	S	8	R	0.06	S	<=1	S	<=2	S	NEG	0.5	S	<=0.25	S	<=0.25	S	FLAG	FLAG	<=2	S
2245STDY5699141	2009219599	2009219599	12291_5#25	ACTIVE_BACTERIAL_CORE_SURVEILLANCE	UNITED STATES	MINNESOTA	CDC	1999	BACTEREMIA	BLOOD	ERR505827	ERS394241	124	39	14	<=0.03	S	S	<=0.03	S	<=0.06	S	<=0.06	S	S	<=0.5	S	S	<=0.5	S	0.06	S	0.06	S	<=1	S	<=2	S	NEG	0.5	S	<=0.25	S	<=0.25	S	<=2	S	<=2	S
2245STDY5608951	2010206278	2010206278	11511_8#14	ACTIVE_BACTERIAL_CORE_SURVEILLANCE	UNITED STATES	GEORGIA	CDC	2009	BACTEREMIA	BLOOD	ERR425452	ERS356316	4026	6	19A	4	R	I	8	R	1	R	1	I	S	1	I	S	>2	R	8	R	0.06	S	<=1	S	<=2	S	NEG	>=4	R	<=0.25	S	<=0.25	S	<=2	S	<=2	S
2245STDY5608948	2010206305	2010206305	11657_4#14	ACTIVE_BACTERIAL_CORE_SURVEILLANCE	UNITED STATES	MINNESOTA	CDC	2009	BACTEREMIA	BLOOD	ERR433614	ERS356313	227	31	1	<=0.03	S	S	<=0.03	S	<=0.06	S	<=0.06	S	S	<=0.5	S	S	<=0.5	S	0.06	S	0.06	S	<=1	S	<=2	S	NEG	0.5	S	<=0.25	S	<=0.25	S	<=2	S	<=2	S
2245STDY5608958	2010208312	2010208312	11658_2#93	ACTIVE_BACTERIAL_CORE_SURVEILLANCE	UNITED STATES	NEW MEXICO	CDC	2009	BACTEREMIA	BLOOD	ERR433938	ERS356323	1373	5	23B	0.25	R	S	0.06	S	<=0.06	S	0.12	S	S	<=0.5	S	S	<=0.5	S	0.06	S	0.06	S	<=1	S	<=2	S	NEG	2	I	<=0.25	S	<=0.25	S	<=2	S	<=2	S
2245STDY5608990	2010208449	2010208449	11511_8#21	ACTIVE_BACTERIAL_CORE_SURVEILLANCE	UNITED STATES	NEW YORK	CDC	2009	BACTEREMIA	BLOOD	ERR425459	ERS356354	433	19	22F	<=0.03	S	S	<=0.03	S	<=0.06	S	<=0.06	S	S	<=0.5	S	S	<=0.5	S	0.06	S	0.06	S	<=1	S	<=2	S	NEG	0.5	S	<=0.25	S	<=0.25	S	<=2	S	<=2	S
2245STDY5608982	2010209958	2010209958	11679_1#27	ACTIVE_BACTERIAL_CORE_SURVEILLANCE	UNITED STATES	MINNESOTA	CDC	2009	BACTEREMIA	BLOOD	ERR433991	ERS356347	1451	1	19A	4	R	I	8	R	1	R	2	R	I	2	R	I	>2	R	>32	R	>2	R	<=1	S	<=2	S	POS	>=4	R	>8	R	>=1	R	<=2	S	<=2	S
2245STDY5608993	2010216340	2010216340	11657_8#13	ACTIVE_BACTERIAL_CORE_SURVEILLANCE	UNITED STATES	CALIFORNIA	CDC	2009	BACTEREMIA	BLOOD	ERR433706	ERS356357	1451	1	19A	4	R	I	8	R	1	R	2	R	I	1	I	S	>2	R	>32	R	>2	R	<=1	S	<=2	S	POS	>=4	R	>8	R	>=1	R	<=2	S	<=2	S
2245STDY5608997	2010220066	2010220066	11511_8#23	ACTIVE_BACTERIAL_CORE_SURVEILLANCE	UNITED STATES	TENNESSEE	CDC	2009	BACTEREMIA	BLOOD	ERR425461	ERS356361	220	32	12F	<=0.03	S	S	<=0.03	S	<=0.06	S	<=0.06	S	S	<=0.5	S	S	<=0.5	S	0.06	S	0.06	S	<=1	S	<=2	S	NEG	0.5	S	<=0.25	S	<=0.25	S	<=2	S	<=2	S
2245STDY5608962	2010223357	2010223357	11679_1#19	ACTIVE_BACTERIAL_CORE_SURVEILLANCE	UNITED STATES	NEW YORK	CDC	2009	BACTEREMIA	BLOOD	ERR433983	ERS356327	393	38	38	<=0.03	S	S	<=0.03	S	<=0.06	S	<=0.06	S	S	<=0.5	S	S	<=0.5	S	0.06	S	0.06	S	<=1	S	<=2	S	NEG	0.5	S	<=0.25	S	<=0.25	S	<=2	S	<=2	S
2245STDY5562366	2050_00	2050_00	11511_7#54	ACTIVE_BACTERIAL_CORE_SURVEILLANCE	UNITED STATES	TENNESSEE	CDC	1999	BACTEREMIA	BLOOD	ERR425406	ERS322403	227	31	1	<=0.03	S	S	<=0.03	S	<=0.06	S	<=0.06	S	S	<=0.5	S	S	<=0.5	S	0.06	S	0.06	S	<=1	S	<=2	S	NEG	0.5	S	<=0.25	S	<=0.25	S	<=2	S	<=2	S
2245STDY5562367	2062_00	2062_00	11511_7#55	ACTIVE_BACTERIAL_CORE_SURVEILLANCE	UNITED STATES	TENNESSEE	CDC	1999	BACTEREMIA	BLOOD	ERR425407	ERS322404	124	39	14	<=0.03	S	S	<=0.03	S	<=0.06	S	<=0.06	S	S	<=0.5	S	S	<=0.5	S	0.06	S	0.06	S	<=1	S	<=2	S	NEG	0.5	S	<=0.25	S	<=0.25	S	<=2	S	<=2	S
2245STDY5562537	2176_00	2176_00	11657_2#21	ACTIVE_BACTERIAL_CORE_SURVEILLANCE	UNITED STATES	TENNESSEE	CDC	1999	BACTEREMIA	BLOOD	ERR433541	ERS322570	692	7	23F	4	R	I	8	R	>1	R	8	R	R	4	R	R	>2	R	0.06	S	0.06	S	<=1	S	<=2	S	NEG	>=4	R	<=0.25	S	<=0.25	S	<=2	S	<=2	S
2245STDY5562486	2184_98	2184_98	11826_1#72	ACTIVE_BACTERIAL_CORE_SURVEILLANCE	UNITED STATES	GEORGIA	CDC	1998	BACTEREMIA	BLOOD	ERR449258	ERS322520	37	7	23F	4	R	I	8	R	>1	R	8	R	R	4	R	R	>2	R	0.06	S	0.06	S	<=1	S	<=2	S	NEG	>=4	R	<=0.25	S	<=0.25	S	<=2	S	<=2	S
2245STDY5699155	2279_99	2279_99	12291_5#39	ACTIVE_BACTERIAL_CORE_SURVEILLANCE	UNITED STATES	CONNECTICUT	CDC	1998	BACTEREMIA	BLOOD	ERR505841	ERS394255	113	50	18B	<=0.03	S	S	<=0.03	S	<=0.06	S	<=0.06	S	S	<=0.5	S	S	<=0.5	S	0.06	S	0.06	S	<=1	S	<=2	S	NEG	0.5	S	<=0.25	S	<=0.25	S	<=2	S	<=2	S
2245STDY5562487	2344_98	2344_98	11826_1#73	ACTIVE_BACTERIAL_CORE_SURVEILLANCE	UNITED STATES	GEORGIA	CDC	1998	BACTEREMIA	BLOOD	ERR449259	ERS322521	156	6	9V	2	R	S	2	S	0.5	I	1	I	S	1	I	S	>2	R	0.06	S	0.06	S	<=1	S	<=2	S	NEG	>=4	R	<=0.25	S	<=0.25	S	<=2	S	<=2	S
2245STDY5609110	2353_99	2353_99	11657_8#68	ACTIVE_BACTERIAL_CORE_SURVEILLANCE	UNITED STATES	GEORGIA	CDC	1998	BACTEREMIA	BLOOD	ERR433759	ERS356480	124	39	14	<=0.03	S	S	<=0.03	S	<=0.06	S	<=0.06	S	S	<=0.5	S	S	<=0.5	S	0.06	S	0.06	S	<=1	S	<=2	S	NEG	0.5	S	<=0.25	S	<=0.25	S	<=2	S	<=2	S
2245STDY5562541	2418_99	2418_99	11657_2#24	ACTIVE_BACTERIAL_CORE_SURVEILLANCE	UNITED STATES	CONNECTICUT	CDC	1998	BACTEREMIA	BLOOD	ERR433544	ERS322573	236	1	19F	2	R	S	4	I	1	R	1	I	S	2	R	I	>2	R	0.06	S	0.06	S	<=1	S	<=2	S	NEG	>=4	R	<=0.25	S	<=0.25	S	<=2	S	<=2	S
2245STDY5609111	2426_99	2426_99	11679_1#48	ACTIVE_BACTERIAL_CORE_SURVEILLANCE	UNITED STATES	CONNECTICUT	CDC	1998	BACTEREMIA	BLOOD	ERR434012	ERS356481	124	39	14	<=0.03	S	S	<=0.03	S	<=0.06	S	<=0.06	S	S	<=0.5	S	S	<=0.5	S	0.06	S	0.06	S	<=1	S	<=2	S	NEG	0.5	S	<=0.25	S	<=0.25	S	<=2	S	<=2	S
2245STDY5562542	2514_99	2514_99	11657_2#25	ACTIVE_BACTERIAL_CORE_SURVEILLANCE	UNITED STATES	CONNECTICUT	CDC	1998	BACTEREMIA	BLOOD	ERR433545	ERS322574	220	32	12F	<=0.03	S	S	<=0.03	S	<=0.06	S	<=0.06	S	S	<=0.5	S	S	<=0.5	S	0.06	S	0.06	S	<=1	S	<=2	S	NEG	0.5	S	<=0.25	S	<=0.25	S	<=2	S	<=2	S
2245STDY5562488	2641_98	2641_98	11826_1#74	ACTIVE_BACTERIAL_CORE_SURVEILLANCE	UNITED STATES	GEORGIA	CDC	1998	BACTEREMIA	BLOOD	ERR449260	ERS322522	227	31	1	<=0.03	S	S	<=0.03	S	<=0.06	S	<=0.06	S	S	<=0.5	S	S	<=0.5	S	0.06	S	0.06	S	<=1	S	<=2	S	NEG	0.5	S	<=0.25	S	<=0.25	S	<=2	S	<=2	S
2245STDY5486410	2648_99	2648_99	9950_3#21	ACTIVE_BACTERIAL_CORE_SURVEILLANCE	UNITED STATES	CONNECTICUT	CDC	1998	BACTEREMIA	BLOOD	ERR326527	ERS221896	67	16	14	2	R	S	2	S	0.5	I	1	I	S	1	I	S	>2	R	>32	R	>2	R	<=1	S	<=2	S	POS	>=4	R	>8	R	>=1	R	<=2	S	<=2	S
2245STDY5562661	2711_00	2711_00	11657_1#81	ACTIVE_BACTERIAL_CORE_SURVEILLANCE	UNITED STATES	NEW YORK	CDC	1999	BACTEREMIA	BLOOD	ERR433512	ERS322690	1292	89	6C	1	R	S	1	S	0.12	S	0.25	S	S	<=0.5	S	S	2	R	8	R	0.06	S	<=1	S	<=2	S	NEG	>=4	R	<=0.25	S	<=0.25	S	<=2	S	<=2	S
2245STDY5562409	2781_99	2781_99	11826_1#7	ACTIVE_BACTERIAL_CORE_SURVEILLANCE	UNITED STATES	CONNECTICUT	CDC	1998	BACTEREMIA	BLOOD	ERR449196	ERS322446	9512	50	18C	<=0.03	S	S	<=0.03	S	<=0.06	S	<=0.06	S	S	<=0.5	S	S	<=0.5	S	0.06	S	0.06	S	<=1	S	<=2	S	NEG	0.5	S	<=0.25	S	<=0.25	S	<=2	S	<=2	S
2245STDY5562267	2861_98	2861_98	11822_1#9	ACTIVE_BACTERIAL_CORE_SURVEILLANCE	UNITED STATES	GEORGIA	CDC	1998	BACTEREMIA	BLOOD	ERR449100	ERS322307	44	6	14	2	R	S	2	S	0.5	I	1	I	S	1	I	S	>2	R	0.06	S	0.06	S	<=1	S	<=2	S	NEG	>=4	R	<=0.25	S	<=0.25	S	<=2	S	<=2	S
2245STDY5486396	2891_99	2891_99	9950_3#7	ACTIVE_BACTERIAL_CORE_SURVEILLANCE	UNITED STATES	OREGON	CDC	1998	BACTEREMIA	BLOOD	ERR326513	ERS221882	12852	7	23F	0.12	R	S	0.06	S	<=0.06	S	<=0.06	S	S	<=0.5	S	S	<=0.5	S	0.06	S	0.06	S	<=1	S	<=2	S	NEG	2	I	<=0.25	S	<=0.25	S	<=2	S	<=2	S
2245STDY5562411	2896_99	2896_99	11893_8#3	ACTIVE_BACTERIAL_CORE_SURVEILLANCE	UNITED STATES	OREGON	CDC	1998	BACTEREMIA	BLOOD	ERR460191	ERS322448	782	9	14	0.25	R	S	0.25	S	<=0.06	S	<=0.06	S	S	<=0.5	S	S	<=0.5	S	8	R	0.06	S	<=1	S	<=2	S	NEG	>=4	R	>8	R	>=1	R	<=2	S	<=2	S
2245STDY5562431	2941_00	2941_00	11826_1#21	ACTIVE_BACTERIAL_CORE_SURVEILLANCE	UNITED STATES	CALIFORNIA	CDC	1999	BACTEREMIA	BLOOD	ERR449209	ERS322466	200	4	14	<=0.03	S	S	<=0.03	S	<=0.06	S	<=0.06	S	S	<=0.5	S	S	<=0.5	S	0.06	S	0.06	S	<=1	S	<=2	S	NEG	0.5	S	>8	R	>=1	R	<=2	S	<=2	S
2245STDY5486447	2970_99	2970_99	9950_3#58	ACTIVE_BACTERIAL_CORE_SURVEILLANCE	UNITED STATES	MARYLAND	CDC	1998	BACTEREMIA	BLOOD	ERR326564	ERS221933	220	32	12F	<=0.03	S	S	<=0.03	S	<=0.06	S	<=0.06	S	S	<=0.5	S	S	<=0.5	S	8	R	0.06	S	<=1	S	<=2	S	NEG	0.5	S	<=0.25	S	<=0.25	S	<=2	S	<=2	S
2245STDY5562636	2989_99	2989_99	11791_1#5	ACTIVE_BACTERIAL_CORE_SURVEILLANCE	UNITED STATES	MARYLAND	CDC	1998	BACTEREMIA	BLOOD	ERR438951	ERS322665	180	12	3	<=0.03	S	S	<=0.03	S	<=0.06	S	<=0.06	S	S	<=0.5	S	S	<=0.5	S	0.06	S	0.06	S	<=1	S	<=2	S	NEG	0.5	S	<=0.25	S	<=0.25	S	<=2	S	<=2	S
2245STDY5562639	3003_03	3003_03	11791_1#6	ACTIVE_BACTERIAL_CORE_SURVEILLANCE	UNITED STATES	MINNESOTA	CDC	1999	BACTEREMIA	BLOOD	ERR438952	ERS322668	425	175	19F	<=0.03	S	S	<=0.03	S	<=0.06	S	<=0.06	S	S	<=0.5	S	S	<=0.5	S	0.06	S	0.06	S	<=1	S	<=2	S	NEG	0.5	S	<=0.25	S	<=0.25	S	<=2	S	<=2	S
2245STDY5609109	3006_03	3006_03	11658_8#5	ACTIVE_BACTERIAL_CORE_SURVEILLANCE	UNITED STATES	MINNESOTA	CDC	1999	BACTEREMIA	BLOOD	ERR433946	ERS356479	3060	50	18C	<=0.03	S	S	<=0.03	S	<=0.06	S	<=0.06	S	S	<=0.5	S	S	<=0.5	S	0.06	S	0.06	S	<=1	S	<=2	S	NEG	0.5	S	<=0.25	S	<=0.25	S	<=2	S	<=2	S
2245STDY5609116	3008_00	3008_00	11657_8#70	ACTIVE_BACTERIAL_CORE_SURVEILLANCE	UNITED STATES	TENNESSEE	CDC	1999	BACTEREMIA	BLOOD	ERR433761	ERS356486	13	18	14	4	R	I	8	R	1	R	1	I	S	2	R	I	>2	R	8	R	0.06	S	<=1	S	<=2	S	NEG	>=4	R	<=0.25	S	<=0.25	S	<=2	S	<=2	S
2245STDY5562650	3015_00	3015_00	11657_1#72	ACTIVE_BACTERIAL_CORE_SURVEILLANCE	UNITED STATES	TENNESSEE	CDC	1999	BACTEREMIA	BLOOD	ERR433503	ERS322679	3162	18	7C	<=0.03	S	S	<=0.03	S	<=0.06	S	<=0.06	S	S	<=0.5	S	S	<=0.5	S	0.06	S	0.06	S	<=1	S	<=2	S	NEG	0.5	S	<=0.25	S	<=0.25	S	<=2	S	<=2	S
2245STDY5486324	3023_03	3023_03	9950_2#28	ACTIVE_BACTERIAL_CORE_SURVEILLANCE	UNITED STATES	MINNESOTA	CDC	1999	BACTEREMIA	BLOOD	ERR326443	ERS221811	124	39	14	<=0.03	S	S	<=0.03	S	<=0.06	S	<=0.06	S	S	<=0.5	S	S	<=0.5	S	0.06	S	0.06	S	<=1	S	<=2	S	NEG	0.5	S	<=0.25	S	<=0.25	S	<=2	S	<=2	S
2245STDY5562462	3027_03	3027_03	11826_1#50	ACTIVE_BACTERIAL_CORE_SURVEILLANCE	UNITED STATES	MINNESOTA	CDC	1999	BACTEREMIA	BLOOD	ERR449236	ERS322496	1711	50	18C	<=0.03	S	S	<=0.03	S	<=0.06	S	<=0.06	S	S	<=0.5	S	S	<=0.5	S	0.06	S	0.06	S	<=1	S	<=2	S	NEG	0.5	S	<=0.25	S	<=0.25	S	<=2	S	<=2	S
2245STDY5608895	3049_03	3049_03	11679_1#1	ACTIVE_BACTERIAL_CORE_SURVEILLANCE	UNITED STATES	MINNESOTA	CDC	1999	BACTEREMIA	BLOOD	ERR433965	ERS356260	180	12	3	<=0.03	S	S	<=0.03	S	<=0.06	S	<=0.06	S	S	<=0.5	S	S	<=0.5	S	0.06	S	0.06	S	<=1	S	<=2	S	NEG	0.5	S	<=0.25	S	<=0.25	S	<=2	S	<=2	S
2245STDY5486441	3050_99	3050_99	9950_3#52	ACTIVE_BACTERIAL_CORE_SURVEILLANCE	UNITED STATES	NEW YORK	CDC	1998	BACTEREMIA	BLOOD	ERR326558	ERS221927	558	59	35B	2	R	S	4	I	0.5	I	1	I	S	1	I	S	>2	R	0.06	S	0.06	S	<=1	S	<=2	S	NEG	0.5	S	<=0.25	S	<=0.25	S	<=2	S	<=2	S
2245STDY5562242	3057_03	3057_03	11658_8#15	ACTIVE_BACTERIAL_CORE_SURVEILLANCE	UNITED STATES	MINNESOTA	CDC	1999	BACTEREMIA	BLOOD	ERR433956	ERS322282	13	18	14	4	R	I	8	R	1	R	1	I	S	2	R	I	>2	R	8	R	0.06	S	<=1	S	<=2	S	NEG	>=4	R	<=0.25	S	<=0.25	S	<=2	S	<=2	S
2245STDY5562532	3061_00	3061_00	11657_2#18	ACTIVE_BACTERIAL_CORE_SURVEILLANCE	UNITED STATES	TENNESSEE	CDC	1999	BACTEREMIA	BLOOD	ERR433538	ERS322565	9511	50	18C	<=0.03	S	S	<=0.03	S	<=0.06	S	<=0.06	S	S	<=0.5	S	S	<=0.5	S	0.06	S	0.06	S	<=1	S	<=2	S	NEG	0.5	S	<=0.25	S	<=0.25	S	<=2	S	<=2	S
2245STDY5486457	3067_99	3067_99	9950_3#68	ACTIVE_BACTERIAL_CORE_SURVEILLANCE	UNITED STATES	NEW YORK	CDC	1998	BACTEREMIA	BLOOD	ERR326574	ERS221943	496	3	18C	<=0.03	S	S	<=0.03	S	<=0.06	S	<=0.06	S	S	<=0.5	S	S	<=0.5	S	0.06	S	0.06	S	<=1	S	<=2	S	NEG	0.5	S	<=0.25	S	<=0.25	S	<=2	S	<=2	S
2245STDY5486465	3070_99	3070_99	9950_3#76	ACTIVE_BACTERIAL_CORE_SURVEILLANCE	UNITED STATES	NEW YORK	CDC	1998	BACTEREMIA	BLOOD	ERR326582	ERS221951	7430	24	6B	0.25	R	S	0.25	S	0.12	S	0.12	S	S	<=0.5	S	S	<=0.5	S	0.06	S	0.06	S	<=1	S	<=2	S	NEG	>=4	R	<=0.25	S	<=0.25	S	<=2	S	<=2	S
2245STDY5486348	3073_03	3073_03	9950_2#51	ACTIVE_BACTERIAL_CORE_SURVEILLANCE	UNITED STATES	MINNESOTA	CDC	1999	BACTEREMIA	BLOOD	ERR326466	ERS221835	460	64	6A	0.06	S	S	<=0.03	S	<=0.06	S	<=0.06	S	S	<=0.5	S	S	<=0.5	S	0.06	S	0.06	S	<=1	S	<=2	S	NEG	>=4	R	<=0.25	S	<=0.25	S	<=2	S	<=2	S
2245STDY5486372	3079_03	3079_03	9950_2#75	ACTIVE_BACTERIAL_CORE_SURVEILLANCE	UNITED STATES	MINNESOTA	CDC	1999	BACTEREMIA	BLOOD	ERR326490	ERS221859	629	7	23F	0.06	S	S	0.06	S	<=0.06	S	0.12	S	S	<=0.5	S	S	<=0.5	S	0.06	S	0.06	S	<=1	S	<=2	S	NEG	2	I	<=0.25	S	<=0.25	S	<=2	S	<=2	S
2245STDY5562264	3085_98	3085_98	11511_7#5	ACTIVE_BACTERIAL_CORE_SURVEILLANCE	UNITED STATES	GEORGIA	CDC	1998	BACTEREMIA	BLOOD	ERR425360	ERS322304	244	27	4	<=0.03	S	S	<=0.03	S	<=0.06	S	<=0.06	S	S	<=0.5	S	S	<=0.5	S	0.06	S	0.06	S	<=1	S	<=2	S	NEG	0.5	S	<=0.25	S	<=0.25	S	<=2	S	<=2	S
2245STDY5562701	3090_98	3090_98	11791_1#19	ACTIVE_BACTERIAL_CORE_SURVEILLANCE	UNITED STATES	GEORGIA	CDC	1998	BACTEREMIA	BLOOD	ERR438964	ERS322726	3714	224	8	<=0.03	S	S	<=0.03	S	<=0.06	S	<=0.06	S	S	<=0.5	S	S	<=0.5	S	0.06	S	0.06	S	<=1	S	<=2	S	NEG	0.5	S	<=0.25	S	<=0.25	S	<=2	S	<=2	S
2245STDY5486403	3123_99	3123_99	9950_3#14	ACTIVE_BACTERIAL_CORE_SURVEILLANCE	UNITED STATES	GEORGIA	CDC	1999	BACTEREMIA	BLOOD	ERR326520	ERS221889	649	4	19F	<=0.03	S	S	<=0.03	S	<=0.06	S	<=0.06	S	S	<=0.5	S	S	<=0.5	S	0.06	S	0.06	S	<=1	S	<=2	S	NEG	0.5	S	<=0.25	S	<=0.25	S	<=2	S	<=2	S
2245STDY5562384	3124_99	3124_99	11511_7#72	ACTIVE_BACTERIAL_CORE_SURVEILLANCE	UNITED STATES	GEORGIA	CDC	1999	BACTEREMIA	BLOOD	ERR425424	ERS322421	376	97	6A	2	R	S	1	S	0.5	I	0.5	S	S	1	I	S	>2	R	8	R	0.06	S	<=1	S	<=2	S	NEG	>=4	R	<=0.25	S	<=0.25	S	<=2	S	<=2	S
2245STDY5562405	3223_99	3223_99	11826_1#3	ACTIVE_BACTERIAL_CORE_SURVEILLANCE	UNITED STATES	GEORGIA	CDC	1999	BACTEREMIA	BLOOD	ERR449193	ERS322442	695	27	4	<=0.03	S	S	<=0.03	S	<=0.06	S	<=0.06	S	S	<=0.5	S	S	<=0.5	S	0.06	S	0.06	S	<=1	S	<=2	S	NEG	2	I	<=0.25	S	<=0.25	S	<=2	S	<=2	S
2245STDY5609178	3262_95	3262_95	11511_8#63	ACTIVE_BACTERIAL_CORE_SURVEILLANCE	UNITED STATES	MARYLAND	CDC	1995	BACTEREMIA	BLOOD	ERR425499	ERS356548	1390	111	6C	<=0.03	S	S	<=0.03	S	<=0.06	S	<=0.06	S	S	<=0.5	S	S	<=0.5	S	0.06	S	0.06	S	<=1	S	<=2	S	NEG	0.5	S	<=0.25	S	<=0.25	S	<=2	S	<=2	S
2245STDY5562358	3301_00	3301_00	11511_7#46	ACTIVE_BACTERIAL_CORE_SURVEILLANCE	UNITED STATES	CONNECTICUT	CDC	1999	BACTEREMIA	BLOOD	ERR425398	ERS322395	138	24	6B	<=0.03	S	S	<=0.03	S	<=0.06	S	<=0.06	S	S	<=0.5	S	S	<=0.5	S	0.06	S	0.06	S	<=1	S	<=2	S	NEG	0.5	S	<=0.25	S	<=0.25	S	<=2	S	<=2	S
2245STDY5562369	3352_00	3352_00	11511_7#57	ACTIVE_BACTERIAL_CORE_SURVEILLANCE	UNITED STATES	CONNECTICUT	CDC	1999	BACTEREMIA	BLOOD	ERR425409	ERS322406	193	11	19A	<=0.03	S	S	<=0.03	S	<=0.06	S	<=0.06	S	S	<=0.5	S	S	<=0.5	S	8	R	0.06	S	<=1	S	<=2	S	NEG	>=4	R	<=0.25	S	<=0.25	S	<=2	S	<=2	S
2245STDY5562536	3365_00	3365_00	11657_2#20	ACTIVE_BACTERIAL_CORE_SURVEILLANCE	UNITED STATES	CONNECTICUT	CDC	1999	BACTEREMIA	BLOOD	ERR433540	ERS322569	628	7	23F	<=0.03	S	S	<=0.03	S	<=0.06	S	<=0.06	S	S	<=0.5	S	S	<=0.5	S	0.06	S	0.06	S	<=1	S	<=2	S	NEG	0.5	S	<=0.25	S	<=0.25	S	<=2	S	<=2	S
2245STDY5562353	3414_99	3414_99	11511_7#42	ACTIVE_BACTERIAL_CORE_SURVEILLANCE	UNITED STATES	GEORGIA	CDC	1999	BACTEREMIA	BLOOD	ERR425395	ERS322390	156	6	9V	2	R	S	2	S	0.5	I	1	I	S	1	I	S	>2	R	0.06	S	0.06	S	<=1	S	<=2	S	NEG	>=4	R	<=0.25	S	<=0.25	S	<=2	S	<=2	S
2245STDY5562361	3428_00	3428_00	11511_7#49	ACTIVE_BACTERIAL_CORE_SURVEILLANCE	UNITED STATES	CONNECTICUT	CDC	1999	BACTEREMIA	BLOOD	ERR425401	ERS322398	496	3	18C	<=0.03	S	S	<=0.03	S	<=0.06	S	<=0.06	S	S	<=0.5	S	S	<=0.5	S	0.06	S	0.06	S	<=1	S	<=2	S	NEG	0.5	S	<=0.25	S	<=0.25	S	<=2	S	<=2	S
2245STDY5562714	3432_99	3432_99	11791_1#23	ACTIVE_BACTERIAL_CORE_SURVEILLANCE	UNITED STATES	GEORGIA	CDC	1999	BACTEREMIA	BLOOD	ERR438968	ERS322739	156	6	9V	2	R	S	2	S	0.5	I	1	I	S	1	I	S	>2	R	0.06	S	0.06	S	<=1	S	<=2	S	NEG	>=4	R	<=0.25	S	<=0.25	S	<=2	S	<=2	S
2245STDY5562469	3615_99	3615_99	11826_1#57	ACTIVE_BACTERIAL_CORE_SURVEILLANCE	UNITED STATES	CONNECTICUT	CDC	1998	BACTEREMIA	BLOOD	ERR449243	ERS322503	113	50	18C	<=0.03	S	S	<=0.03	S	<=0.06	S	<=0.06	S	S	<=0.5	S	S	<=0.5	S	0.06	S	0.06	S	<=1	S	<=2	S	NEG	2	I	<=0.25	S	<=0.25	S	<=2	S	<=2	S
2245STDY5562656	3644_03	3644_03	11657_1#78	ACTIVE_BACTERIAL_CORE_SURVEILLANCE	UNITED STATES	CONNECTICUT	CDC	1999	BACTEREMIA	BLOOD	ERR433509	ERS322685	42	7	23A	<=0.03	S	S	<=0.03	S	<=0.06	S	<=0.06	S	S	<=0.5	S	S	<=0.5	S	0.06	S	0.06	S	<=1	S	<=2	S	NEG	0.5	S	<=0.25	S	<=0.25	S	<=2	S	<=2	S
2245STDY5486416	3679_99	3679_99	9950_3#27	ACTIVE_BACTERIAL_CORE_SURVEILLANCE	UNITED STATES	TENNESSEE	CDC	1998	BACTEREMIA	BLOOD	ERR326533	ERS221902	124	39	14	<=0.03	S	S	<=0.03	S	<=0.06	S	<=0.06	S	S	<=0.5	S	S	<=0.5	S	0.06	S	0.06	S	<=1	S	<=2	S	NEG	0.5	S	<=0.25	S	<=0.25	S	<=2	S	<=2	S
2245STDY5486424	3688_99	3688_99	9950_3#35	ACTIVE_BACTERIAL_CORE_SURVEILLANCE	UNITED STATES	TENNESSEE	CDC	1998	BACTEREMIA	BLOOD	ERR326541	ERS221910	643	6	9V	0.25	R	S	0.25	S	0.12	S	0.12	S	S	<=0.5	S	S	1	I	0.06	S	0.06	S	<=1	S	<=2	S	NEG	0.5	S	<=0.25	S	<=0.25	S	FLAG	FLAG	<=2	S
2245STDY5562470	3698_99	3698_99	11826_1#58	ACTIVE_BACTERIAL_CORE_SURVEILLANCE	UNITED STATES	TENNESSEE	CDC	1998	BACTEREMIA	BLOOD	ERR449244	ERS322504	81	16	19F	2	R	S	2	S	0.5	I	1	I	S	1	I	S	>2	R	8	R	0.06	S	<=1	S	<=2	S	NEG	>=4	R	>8	R	>=1	R	<=2	S	>=8	R
2245STDY5562472	3731_99	3731_99	11826_1#60	ACTIVE_BACTERIAL_CORE_SURVEILLANCE	UNITED STATES	TENNESSEE	CDC	1998	BACTEREMIA	BLOOD	ERR449246	ERS322506	384	23	6B	4	R	I	4	I	1	R	1	I	S	1	I	S	>2	R	8	R	0.06	S	<=1	S	<=2	S	NEG	>=4	R	>8	R	>=1	R	<=2	S	<=2	S
2245STDY5486432	3746_99	3746_99	9950_3#43	ACTIVE_BACTERIAL_CORE_SURVEILLANCE	UNITED STATES	TENNESSEE	CDC	1998	BACTEREMIA	BLOOD	ERR326549	ERS221918	9557	27	4	<=0.03	S	S	<=0.03	S	<=0.06	S	<=0.06	S	S	<=0.5	S	S	<=0.5	S	0.06	S	0.06	S	<=1	S	<=2	S	NEG	2	I	>8	R	>=1	R	<=2	S	<=2	S
2245STDY5486374	3867_00	3867_00	9950_2#77	ACTIVE_BACTERIAL_CORE_SURVEILLANCE	UNITED STATES	TENNESSEE	CDC	1999	BACTEREMIA	BLOOD	ERR326492	ERS221861	146	23	6B	<=0.03	S	S	<=0.03	S	<=0.06	S	<=0.06	S	S	<=0.5	S	S	<=0.5	S	0.06	S	0.06	S	<=1	S	<=2	S	NEG	>=4	R	<=0.25	S	<=0.25	S	<=2	S	<=2	S
2245STDY5562413	3913_99	3913_99	11826_1#10	ACTIVE_BACTERIAL_CORE_SURVEILLANCE	UNITED STATES	GEORGIA	CDC	1999	BACTEREMIA	BLOOD	ERR449198	ERS322450	100	3	33F	<=0.03	S	S	<=0.03	S	<=0.06	S	<=0.06	S	S	<=0.5	S	S	<=0.5	S	0.06	S	0.06	S	<=1	S	<=2	S	NEG	2	I	<=0.25	S	<=0.25	S	<=2	S	<=2	S
2245STDY5562390	4025_99	4025_99	11511_7#78	ACTIVE_BACTERIAL_CORE_SURVEILLANCE	UNITED STATES	GEORGIA	CDC	1999	BACTEREMIA	BLOOD	ERR425430	ERS322427	439	7	23F	<=0.03	S	S	<=0.03	S	<=0.06	S	<=0.06	S	S	<=0.5	S	S	<=0.5	S	0.06	S	0.06	S	<=1	S	<=2	S	NEG	2	I	<=0.25	S	<=0.25	S	<=2	S	<=2	S
2245STDY5609118	4071_00	4071_00	11657_8#72	ACTIVE_BACTERIAL_CORE_SURVEILLANCE	UNITED STATES	OREGON	CDC	1999	BACTEREMIA	BLOOD	ERR433763	ERS356488	124	39	14	<=0.03	S	S	<=0.03	S	<=0.06	S	<=0.06	S	S	<=0.5	S	S	<=0.5	S	0.06	S	0.06	S	<=1	S	<=2	S	NEG	0.5	S	<=0.25	S	<=0.25	S	<=2	S	<=2	S
2245STDY5562437	4188_00	4188_00	11826_1#26	ACTIVE_BACTERIAL_CORE_SURVEILLANCE	UNITED STATES	NEW YORK	CDC	1999	BACTEREMIA	BLOOD	ERR449214	ERS322471	1516	50	18C	<=0.03	S	S	<=0.03	S	<=0.06	S	<=0.06	S	S	<=0.5	S	S	<=0.5	S	0.06	S	0.06	S	<=1	S	<=2	S	NEG	0.5	S	<=0.25	S	<=0.25	S	<=2	S	<=2	S
2245STDY5562681	4198_00	4198_00	11657_1#91	ACTIVE_BACTERIAL_CORE_SURVEILLANCE	UNITED STATES	NEW YORK	CDC	1999	BACTEREMIA	BLOOD	ERR433521	ERS322707	156	6	9V	2	R	S	2	S	0.5	I	1	I	S	1	I	S	>2	R	0.06	S	0.06	S	<=1	S	<=2	S	NEG	>=4	R	<=0.25	S	<=0.25	S	<=2	S	<=2	S
2245STDY5699144	4223_99	4223_99	12291_5#28	ACTIVE_BACTERIAL_CORE_SURVEILLANCE	UNITED STATES	GEORGIA	CDC	1999	BACTEREMIA	BLOOD	ERR505830	ERS394244	12702	123	37	<=0.03	S	S	<=0.03	S	<=0.06	S	<=0.06	S	S	<=0.5	S	S	<=0.5	S	0.06	S	0.06	S	<=1	S	<=2	S	NEG	0.5	S	<=0.25	S	<=0.25	S	<=2	S	<=2	S
2245STDY5609124	4346_99	4346_99	11658_2#57	ACTIVE_BACTERIAL_CORE_SURVEILLANCE	UNITED STATES	GEORGIA	CDC	1999	BACTEREMIA	BLOOD	ERR433908	ERS356494	634	16	19F	2	R	S	2	S	0.5	I	1	I	S	1	I	S	>2	R	8	R	0.06	S	<=1	S	<=2	S	NEG	>=4	R	>8	R	>=1	R	<=2	S	>=8	R
2245STDY5609125	4347_99	4347_99	11657_8#74	ACTIVE_BACTERIAL_CORE_SURVEILLANCE	UNITED STATES	GEORGIA	CDC	1999	BACTEREMIA	BLOOD	ERR433765	ERS356495	124	39	14	<=0.03	S	S	<=0.03	S	<=0.06	S	<=0.06	S	S	<=0.5	S	S	<=0.5	S	0.06	S	0.06	S	<=1	S	<=2	S	NEG	0.5	S	<=0.25	S	<=0.25	S	<=2	S	<=2	S
2245STDY5562501	4380_03	4380_03	11822_1#73	ACTIVE_BACTERIAL_CORE_SURVEILLANCE	UNITED STATES	MINNESOTA	CDC	1999	BACTEREMIA	BLOOD	ERR449162	ERS322535	156	6	9V	2	R	S	2	S	0.5	I	1	I	S	1	I	S	>2	R	0.06	S	0.06	S	<=1	S	<=2	S	NEG	>=4	R	<=0.25	S	<=0.25	S	<=2	S	<=2	S
2245STDY5562302	4393_03	4393_03	11822_1#32	ACTIVE_BACTERIAL_CORE_SURVEILLANCE	UNITED STATES	MINNESOTA	CDC	1999	BACTEREMIA	BLOOD	ERR449122	ERS322342	113	50	18C	<=0.03	S	S	<=0.03	S	<=0.06	S	<=0.06	S	S	<=0.5	S	S	<=0.5	S	0.06	S	0.06	S	<=1	S	<=2	S	NEG	0.5	S	<=0.25	S	<=0.25	S	<=2	S	<=2	S
2245STDY5486270	4397_99	4397_99	9950_1#82	ACTIVE_BACTERIAL_CORE_SURVEILLANCE	UNITED STATES	GEORGIA	CDC	1999	BACTEREMIA	BLOOD	ERR326406	ERS221760	9505		6B	<=0.03	S	S	<=0.03	S	<=0.06	S	<=0.06	S	S	<=0.5	S	S	<=0.5	S	>32	R	1	R	<=1	S	<=2	S	POS	2	I	<=0.25	S	<=0.25	S	<=2	S	<=2	S
2245STDY5562303	4402_03	4402_03	11822_1#33	ACTIVE_BACTERIAL_CORE_SURVEILLANCE	UNITED STATES	MINNESOTA	CDC	1999	BACTEREMIA	BLOOD	ERR449123	ERS322343	124	39	14	<=0.03	S	S	<=0.03	S	<=0.06	S	<=0.06	S	S	<=0.5	S	S	<=0.5	S	0.06	S	0.06	S	<=1	S	<=2	S	NEG	0.5	S	<=0.25	S	<=0.25	S	<=2	S	<=2	S
2245STDY5562306	4429_03	4429_03	11822_1#35	ACTIVE_BACTERIAL_CORE_SURVEILLANCE	UNITED STATES	MINNESOTA	CDC	1999	BACTEREMIA	BLOOD	ERR449125	ERS322346	1509	23	6A	8	R	R	>8	R	>1	R	8	R	R	4	R	R	>2	R	8	R	0.06	S	<=1	S	<=2	S	NEG	>=4	R	>8	R	>=1	R	<=2	S	<=2	S
2245STDY5562307	4441_03	4441_03	11511_7#19	ACTIVE_BACTERIAL_CORE_SURVEILLANCE	UNITED STATES	MINNESOTA	CDC	1999	BACTEREMIA	BLOOD	ERR425373	ERS322347	124	39	14	<=0.03	S	S	<=0.03	S	<=0.06	S	<=0.06	S	S	<=0.5	S	S	<=0.5	S	0.06	S	0.06	S	<=1	S	<=2	S	NEG	0.5	S	<=0.25	S	<=0.25	S	<=2	S	<=2	S
2245STDY5562393	4487_99	4487_99	11511_7#79	ACTIVE_BACTERIAL_CORE_SURVEILLANCE	UNITED STATES	MARYLAND	CDC	1998	BACTEREMIA	BLOOD	ERR425431	ERS322430	199	4	15B/15C	<=0.03	S	S	<=0.03	S	<=0.06	S	<=0.06	S	S	<=0.5	S	S	<=0.5	S	0.06	S	0.06	S	<=1	S	<=2	S	NEG	0.5	S	<=0.25	S	<=0.25	S	<=2	S	<=2	S
2245STDY5486452	4507_99	4507_99	9950_3#63	ACTIVE_BACTERIAL_CORE_SURVEILLANCE	UNITED STATES	MARYLAND	CDC	1998	BACTEREMIA	BLOOD	ERR326569	ERS221938	124	39	14	<=0.03	S	S	<=0.03	S	<=0.06	S	<=0.06	S	S	<=0.5	S	S	<=0.5	S	0.06	S	0.06	S	<=1	S	<=2	S	NEG	0.5	S	<=0.25	S	<=0.25	S	<=2	S	<=2	S
2245STDY5486468	4536_99	4536_99	9950_3#79	ACTIVE_BACTERIAL_CORE_SURVEILLANCE	UNITED STATES	MARYLAND	CDC	1998	BACTEREMIA	BLOOD	ERR326585	ERS221954	156	6	9V	2	R	S	2	S	0.5	I	1	I	S	1	I	S	>2	R	0.06	S	0.06	S	<=1	S	<=2	S	NEG	>=4	R	<=0.25	S	<=0.25	S	<=2	S	<=2	S
2245STDY5562490	4538_98	4538_98	11822_1#68	ACTIVE_BACTERIAL_CORE_SURVEILLANCE	UNITED STATES	GEORGIA	CDC	1998	BACTEREMIA	BLOOD	ERR449157	ERS322524	124	39	14	<=0.03	S	S	<=0.03	S	<=0.06	S	<=0.06	S	S	<=0.5	S	S	<=0.5	S	0.06	S	0.06	S	<=1	S	<=2	S	NEG	0.5	S	<=0.25	S	<=0.25	S	<=2	S	<=2	S
2245STDY5562622	4542_99	4542_99	11657_2#68	ACTIVE_BACTERIAL_CORE_SURVEILLANCE	UNITED STATES	MARYLAND	CDC	1998	BACTEREMIA	BLOOD	ERR433582	ERS322652	13	18	14	<=0.03	S	S	<=0.03	S	<=0.06	S	<=0.06	S	S	<=0.5	S	S	<=0.5	S	0.06	S	0.06	S	<=1	S	<=2	S	NEG	0.5	S	<=0.25	S	<=0.25	S	<=2	S	<=2	S
2245STDY5699123	4549_99	4549_99	12291_5#8	ACTIVE_BACTERIAL_CORE_SURVEILLANCE	UNITED STATES	MARYLAND	CDC	1998	BACTEREMIA	BLOOD	ERR505810	ERS394224	1269	6	9V	<=0.03	S	S	<=0.03	S	<=0.06	S	<=0.06	S	S	<=0.5	S	S	<=0.5	S	0.06	S	0.06	S	<=1	S	<=2	S	NEG	0.5	S	<=0.25	S	<=0.25	S	<=2	S	<=2	S
2245STDY5562497	4566_00	4566_00	11826_1#79	ACTIVE_BACTERIAL_CORE_SURVEILLANCE	UNITED STATES	MARYLAND	CDC	1999	BACTEREMIA	BLOOD	ERR449263	ERS322531	146	23	6B	<=0.03	S	S	<=0.03	S	<=0.06	S	<=0.06	S	S	<=0.5	S	S	<=0.5	S	0.06	S	0.06	S	<=1	S	<=2	S	NEG	0.5	S	<=0.25	S	<=0.25	S	<=2	S	<=2	S
2245STDY5562498	4575_00	4575_00	11822_1#71	ACTIVE_BACTERIAL_CORE_SURVEILLANCE	UNITED STATES	MARYLAND	CDC	1999	BACTEREMIA	BLOOD	ERR449160	ERS322532	647	13	6A	<=0.03	S	S	<=0.03	S	<=0.06	S	<=0.06	S	S	<=0.5	S	S	<=0.5	S	0.06	S	0.06	S	<=1	S	<=2	S	NEG	0.5	S	<=0.25	S	<=0.25	S	<=2	S	<=2	S
2245STDY5486405	4580_99	4580_99	9950_3#16	ACTIVE_BACTERIAL_CORE_SURVEILLANCE	UNITED STATES	OREGON	CDC	1998	BACTEREMIA	BLOOD	ERR326522	ERS221891	176	24	6B	<=0.03	S	S	<=0.03	S	<=0.06	S	<=0.06	S	S	<=0.5	S	S	<=0.5	S	0.06	S	0.06	S	<=1	S	<=2	S	NEG	0.5	S	<=0.25	S	<=0.25	S	FLAG	FLAG	<=2	S
2245STDY5486413	4589_99	4589_99	9950_3#24	ACTIVE_BACTERIAL_CORE_SURVEILLANCE	UNITED STATES	OREGON	CDC	1998	BACTEREMIA	BLOOD	ERR326530	ERS221899	199	4	15B/15C	<=0.03	S	S	<=0.03	S	<=0.06	S	<=0.06	S	S	<=0.5	S	S	<=0.5	S	0.06	S	0.06	S	<=1	S	<=2	S	NEG	0.5	S	<=0.25	S	<=0.25	S	<=2	S	<=2	S
2245STDY5486437	4741_99	4741_99	9950_3#48	ACTIVE_BACTERIAL_CORE_SURVEILLANCE	UNITED STATES	GEORGIA	CDC	1999	BACTEREMIA	BLOOD	ERR326554	ERS221923	242	14	23F	2	R	S	1	S	0.25	S	1	I	S	1	I	S	>2	R	8	R	0.06	S	<=1	S	<=2	S	NEG	>=4	R	>8	R	>=1	R	<=2	S	<=2	S
2245STDY5562418	4766_99	4766_99	11822_1#61	ACTIVE_BACTERIAL_CORE_SURVEILLANCE	UNITED STATES	GEORGIA	CDC	1999	BACTEREMIA	BLOOD	ERR449150	ERS322455	376	97	6A	2	R	S	1	S	0.5	I	0.5	S	S	1	I	S	>2	R	8	R	0.06	S	<=1	S	<=2	S	NEG	>=4	R	<=0.25	S	<=0.25	S	<=2	S	<=2	S
2245STDY5562510	4804_00	4804_00	11893_8#33	ACTIVE_BACTERIAL_CORE_SURVEILLANCE	UNITED STATES	MARYLAND	CDC	1999	BACTEREMIA	BLOOD	ERR460209	ERS322544	643	6	9V	0.25	R	S	0.25	S	0.12	S	0.12	S	S	<=0.5	S	S	1	I	0.06	S	0.06	S	<=1	S	<=2	S	NEG	2	I	<=0.25	S	<=0.25	S	<=2	S	<=2	S
2245STDY5562604	4837_00	4837_00	11657_2#57	ACTIVE_BACTERIAL_CORE_SURVEILLANCE	UNITED STATES	MARYLAND	CDC	1999	BACTEREMIA	BLOOD	ERR433571	ERS322636	251	119	19F	<=0.03	S	S	<=0.03	S	<=0.06	S	<=0.06	S	S	<=0.5	S	S	<=0.5	S	0.06	S	0.06	S	<=1	S	<=2	S	NEG	0.5	S	<=0.25	S	<=0.25	S	<=2	S	<=2	S
2245STDY5562513	4940_00	4940_00	11657_2#1	ACTIVE_BACTERIAL_CORE_SURVEILLANCE	UNITED STATES	CONNECTICUT	CDC	1999	BACTEREMIA	BLOOD	ERR433522	ERS322547	9	18	14	<=0.03	S	S	<=0.03	S	<=0.06	S	<=0.06	S	S	<=0.5	S	S	<=0.5	S	8	R	0.06	S	<=1	S	<=2	S	NEG	0.5	S	<=0.25	S	<=0.25	S	<=2	S	<=2	S
2245STDY5486469	4964_99	4964_99	9950_3#80	ACTIVE_BACTERIAL_CORE_SURVEILLANCE	UNITED STATES	MARYLAND	CDC	1998	BACTEREMIA	BLOOD	ERR326586	ERS221955	13	18	14	4	R	I	8	R	1	R	1	I	S	2	R	I	>2	R	8	R	0.06	S	<=1	S	<=2	S	NEG	>=4	R	<=0.25	S	<=0.25	S	<=2	S	<=2	S
2245STDY5486477	4984_99	4984_99	9950_3#88	ACTIVE_BACTERIAL_CORE_SURVEILLANCE	UNITED STATES	MARYLAND	CDC	1998	BACTEREMIA	BLOOD	ERR326594	ERS221963	37	7	23F	1	R	S	1	S	0.25	S	4	R	R	4	R	R	>2	R	0.06	S	0.06	S	<=1	S	<=2	S	NEG	>=4	R	<=0.25	S	<=0.25	S	<=2	S	<=2	S
2245STDY5562599	5005_99	5005_99	11657_2#53	ACTIVE_BACTERIAL_CORE_SURVEILLANCE	UNITED STATES	MARYLAND	CDC	1998	BACTEREMIA	BLOOD	ERR433567	ERS322631	124	39	14	<=0.03	S	S	<=0.03	S	<=0.06	S	<=0.06	S	S	<=0.5	S	S	<=0.5	S	0.06	S	0.06	S	<=1	S	<=2	S	NEG	0.5	S	<=0.25	S	<=0.25	S	<=2	S	<=2	S
2245STDY5562419	5043_99	5043_99	11826_1#13	ACTIVE_BACTERIAL_CORE_SURVEILLANCE	UNITED STATES	TENNESSEE	CDC	1998	BACTEREMIA	BLOOD	ERR449201	ERS322456	1844	50	18C	<=0.03	S	S	<=0.03	S	<=0.06	S	<=0.06	S	S	<=0.5	S	S	<=0.5	S	0.06	S	0.06	S	<=1	S	<=2	S	NEG	2	I	<=0.25	S	<=0.25	S	<=2	S	<=2	S
2245STDY5486406	5066_99	5066_99	9950_3#17	ACTIVE_BACTERIAL_CORE_SURVEILLANCE	UNITED STATES	TENNESSEE	CDC	1999	BACTEREMIA	BLOOD	ERR326523	ERS221892	637	50	18C	<=0.03	S	S	<=0.03	S	<=0.06	S	<=0.06	S	S	<=0.5	S	S	<=0.5	S	0.06	S	0.06	S	<=1	S	<=2	S	NEG	0.5	S	<=0.25	S	<=0.25	S	<=2	S	<=2	S
2245STDY5486224	5087_03	5087_03	9950_1#36	ACTIVE_BACTERIAL_CORE_SURVEILLANCE	UNITED STATES	MARYLAND	CDC	2002	BACTEREMIA	BLOOD	ERR326360	ERS221714	663	585	19A	1	R	S	0.5	S	0.5	I	1	I	S	1	I	S	2	R	0.06	S	0.06	S	<=1	S	<=2	S	NEG	>=4	R	>8	R	>=1	R	<=2	S	<=2	S
2245STDY5562629	5116_99	5116_99	11657_2#72	ACTIVE_BACTERIAL_CORE_SURVEILLANCE	UNITED STATES	TENNESSEE	CDC	1999	BACTEREMIA	BLOOD	ERR433586	ERS322658	376	97	6A	2	R	S	1	S	0.5	I	0.5	S	S	1	I	S	>2	R	8	R	0.06	S	<=1	S	<=2	S	NEG	>=4	R	<=0.25	S	<=0.25	S	<=2	S	<=2	S
2245STDY5486414	5121_99	5121_99	9950_3#25	ACTIVE_BACTERIAL_CORE_SURVEILLANCE	UNITED STATES	NEW YORK	CDC	1998	BACTEREMIA	BLOOD	ERR326531	ERS221900	1757	4	15B/15C	<=0.03	S	S	<=0.03	S	<=0.06	S	<=0.06	S	S	<=0.5	S	S	<=0.5	S	0.06	S	0.06	S	<=1	S	<=2	S	NEG	2	I	<=0.25	S	<=0.25	S	<=2	S	<=2	S
2245STDY5609050	5222_99	5222_99	11511_8#44	ACTIVE_BACTERIAL_CORE_SURVEILLANCE	UNITED STATES	GEORGIA	CDC	1999	BACTEREMIA	BLOOD	ERR425480	ERS356421	205	27	4	<=0.03	S	S	<=0.03	S	<=0.06	S	<=0.06	S	S	<=0.5	S	S	<=0.5	S	0.06	S	0.06	S	<=1	S	<=2	S	NEG	0.5	S	<=0.25	S	<=0.25	S	<=2	S	<=2	S
2245STDY5562312	5267_03	5267_03	11511_7#22	ACTIVE_BACTERIAL_CORE_SURVEILLANCE	UNITED STATES	MINNESOTA	CDC	1999	BACTEREMIA	BLOOD	ERR425376	ERS322352	13	18	14	4	R	I	8	R	1	R	1	I	S	2	R	I	>2	R	8	R	0.06	S	<=1	S	<=2	S	NEG	>=4	R	<=0.25	S	<=0.25	S	<=2	S	<=2	S
2245STDY5562313	5270_03	5270_03	11511_7#23	ACTIVE_BACTERIAL_CORE_SURVEILLANCE	UNITED STATES	MINNESOTA	CDC	1999	BACTEREMIA	BLOOD	ERR425377	ERS322353	124	39	14	<=0.03	S	S	<=0.03	S	<=0.06	S	<=0.06	S	S	<=0.5	S	S	<=0.5	S	0.06	S	0.06	S	<=1	S	<=2	S	NEG	0.5	S	<=0.25	S	<=0.25	S	<=2	S	<=2	S
2245STDY5562314	5274_03	5274_03	11511_7#24	ACTIVE_BACTERIAL_CORE_SURVEILLANCE	UNITED STATES	MINNESOTA	CDC	1999	BACTEREMIA	BLOOD	ERR425378	ERS322354	124	39	14	<=0.03	S	S	<=0.03	S	<=0.06	S	<=0.06	S	S	<=0.5	S	S	<=0.5	S	0.06	S	0.06	S	<=1	S	<=2	S	NEG	0.5	S	<=0.25	S	<=0.25	S	<=2	S	<=2	S
2245STDY5562316	5289_03	5289_03	11822_1#38	ACTIVE_BACTERIAL_CORE_SURVEILLANCE	UNITED STATES	MINNESOTA	CDC	1999	BACTEREMIA	BLOOD	ERR449128	ERS322356	460	64	6A	0.06	S	S	<=0.03	S	<=0.06	S	<=0.06	S	S	<=0.5	S	S	<=0.5	S	0.06	S	0.06	S	<=1	S	<=2	S	NEG	>=4	R	<=0.25	S	<=0.25	S	<=2	S	<=2	S
2245STDY5562317	5291_03	5291_03	11822_1#39	ACTIVE_BACTERIAL_CORE_SURVEILLANCE	UNITED STATES	MINNESOTA	CDC	1999	BACTEREMIA	BLOOD	ERR449129	ERS322357	13	18	14	4	R	I	8	R	1	R	1	I	S	2	R	I	>2	R	8	R	0.06	S	<=1	S	<=2	S	NEG	>=4	R	<=0.25	S	<=0.25	S	<=2	S	<=2	S
2245STDY5562507	5294_03	5294_03	11822_1#77	ACTIVE_BACTERIAL_CORE_SURVEILLANCE	UNITED STATES	MINNESOTA	CDC	1999	BACTEREMIA	BLOOD	ERR449166	ERS322541	433	19	22F	<=0.03	S	S	<=0.03	S	<=0.06	S	<=0.06	S	S	<=0.5	S	S	<=0.5	S	0.06	S	0.06	S	<=1	S	<=2	S	NEG	0.5	S	<=0.25	S	<=0.25	S	<=2	S	<=2	S
2245STDY5562667	5314_03	5314_03	11657_1#83	ACTIVE_BACTERIAL_CORE_SURVEILLANCE	UNITED STATES	MINNESOTA	CDC	1999	BACTEREMIA	BLOOD	ERR433513	ERS322695	205	27	4	<=0.03	S	S	<=0.03	S	<=0.06	S	<=0.06	S	S	<=0.5	S	S	<=0.5	S	0.06	S	0.06	S	<=1	S	<=2	S	NEG	0.5	S	<=0.25	S	<=0.25	S	<=2	S	<=2	S
2245STDY5562271	5327_98	5327_98	11822_1#11	ACTIVE_BACTERIAL_CORE_SURVEILLANCE	UNITED STATES	GEORGIA	CDC	1998	BACTEREMIA	BLOOD	ERR449102	ERS322311	1515	50	18C	<=0.03	S	S	<=0.03	S	<=0.06	S	<=0.06	S	S	<=0.5	S	S	<=0.5	S	0.06	S	0.06	S	<=1	S	<=2	S	NEG	0.5	S	<=0.25	S	<=0.25	S	<=2	S	<=2	S
2245STDY5562295	5348_00	5348_00	11822_1#29	ACTIVE_BACTERIAL_CORE_SURVEILLANCE	UNITED STATES	TENNESSEE	CDC	1999	BACTEREMIA	BLOOD	ERR449120	ERS322335	220	32	12F	<=0.03	S	S	<=0.03	S	<=0.06	S	<=0.06	S	S	<=0.5	S	S	<=0.5	S	0.06	S	0.06	S	<=1	S	<=2	S	NEG	0.5	S	<=0.25	S	<=0.25	S	<=2	S	<=2	S
2245STDY5562296	5350_00	5350_00	11822_1#30	ACTIVE_BACTERIAL_CORE_SURVEILLANCE	UNITED STATES	TENNESSEE	CDC	1999	BACTEREMIA	BLOOD	ERR449121	ERS322336	124	39	14	<=0.03	S	S	<=0.03	S	<=0.06	S	<=0.06	S	S	<=0.5	S	S	<=0.5	S	0.06	S	0.06	S	<=1	S	<=2	S	NEG	0.5	S	<=0.25	S	<=0.25	S	<=2	S	<=2	S
2245STDY5562697	5362_99	5362_99	11658_1#9	ACTIVE_BACTERIAL_CORE_SURVEILLANCE	UNITED STATES	MARYLAND	CDC	1999	BACTEREMIA	BLOOD	ERR433778	ERS322723	205	27	4	<=0.03	S	S	<=0.03	S	<=0.06	S	<=0.06	S	S	<=0.5	S	S	<=0.5	S	0.06	S	0.06	S	<=1	S	<=2	S	NEG	0.5	S	<=0.25	S	<=0.25	S	<=2	S	<=2	S
2245STDY5562273	5367_98	5367_98	11822_1#13	ACTIVE_BACTERIAL_CORE_SURVEILLANCE	UNITED STATES	GEORGIA	CDC	1998	BACTEREMIA	BLOOD	ERR449104	ERS322313	13	18	14	4	R	I	8	R	1	R	1	I	S	2	R	I	>2	R	8	R	0.06	S	<=1	S	<=2	S	NEG	>=4	R	<=0.25	S	<=0.25	S	<=2	S	<=2	S
2245STDY5486455	5431_99	5431_99	9950_3#66	ACTIVE_BACTERIAL_CORE_SURVEILLANCE	UNITED STATES	MARYLAND	CDC	1999	BACTEREMIA	BLOOD	ERR326572	ERS221941	124	39	14	<=0.03	S	S	<=0.03	S	<=0.06	S	<=0.06	S	S	<=0.5	S	S	<=0.5	S	0.06	S	0.06	S	<=1	S	<=2	S	NEG	0.5	S	<=0.25	S	<=0.25	S	<=2	S	<=2	S
2245STDY5486463	5433_99	5433_99	9950_3#74	ACTIVE_BACTERIAL_CORE_SURVEILLANCE	UNITED STATES	MARYLAND	CDC	1999	BACTEREMIA	BLOOD	ERR326580	ERS221949	15	18	14	<=0.03	S	S	<=0.03	S	<=0.06	S	<=0.06	S	S	<=0.5	S	S	<=0.5	S	0.06	S	0.06	S	<=1	S	<=2	S	NEG	>=4	R	>8	R	>=1	R	<=2	S	<=2	S
2245STDY5486248	5523_03	5523_03	9950_1#60	ACTIVE_BACTERIAL_CORE_SURVEILLANCE	UNITED STATES	GEORGIA	CDC	2003	BACTEREMIA	BLOOD	ERR326384	ERS221738	899	27	4	<=0.03	S	S	<=0.03	S	<=0.06	S	<=0.06	S	S	<=0.5	S	S	<=0.5	S	0.06	S	0.06	S	<=1	S	<=2	S	NEG	0.5	S	<=0.25	S	<=0.25	S	<=2	S	<=2	S
2245STDY5562529	5740_99	5740_99	11657_2#15	ACTIVE_BACTERIAL_CORE_SURVEILLANCE	UNITED STATES	CONNECTICUT	CDC	1999	BACTEREMIA	BLOOD	ERR433535	ERS322562	205	27	4	<=0.03	S	S	<=0.03	S	<=0.06	S	<=0.06	S	S	<=0.5	S	S	<=0.5	S	0.06	S	0.06	S	<=1	S	<=2	S	NEG	0.5	S	<=0.25	S	<=0.25	S	<=2	S	<=2	S
2245STDY5562607	5754_00	5754_00	11822_1#95	ACTIVE_BACTERIAL_CORE_SURVEILLANCE	UNITED STATES	MARYLAND	CDC	1999	BACTEREMIA	BLOOD	ERR449184	ERS322639	180	12	3	<=0.03	S	S	<=0.03	S	<=0.06	S	<=0.06	S	S	<=0.5	S	S	<=0.5	S	0.06	S	0.06	S	<=1	S	<=2	S	NEG	0.5	S	<=0.25	S	<=0.25	S	<=2	S	<=2	S
2245STDY5562485	5817_99	5817_99	11826_1#71	ACTIVE_BACTERIAL_CORE_SURVEILLANCE	UNITED STATES	CONNECTICUT	CDC	1999	BACTEREMIA	BLOOD	ERR449257	ERS322519	393	38	38	<=0.03	S	S	<=0.03	S	<=0.06	S	<=0.06	S	S	<=0.5	S	S	<=0.5	S	0.06	S	0.06	S	<=1	S	<=2	S	NEG	0.5	S	<=0.25	S	<=0.25	S	<=2	S	<=2	S
2245STDY5562246	5834_99	5834_99	11657_8#62	ACTIVE_BACTERIAL_CORE_SURVEILLANCE	UNITED STATES	CONNECTICUT	CDC	1999	BACTEREMIA	BLOOD	ERR433753	ERS322286	251	119	19F	<=0.03	S	S	<=0.03	S	<=0.06	S	<=0.06	S	S	<=0.5	S	S	<=0.5	S	0.06	S	0.06	S	<=1	S	<=2	S	NEG	0.5	S	<=0.25	S	<=0.25	S	<=2	S	<=2	S
2245STDY5609121	5875_99	5875_99	11658_8#6	ACTIVE_BACTERIAL_CORE_SURVEILLANCE	UNITED STATES	CONNECTICUT	CDC	1999	BACTEREMIA	BLOOD	ERR433947	ERS356491	124	39	14	<=0.03	S	S	<=0.03	S	<=0.06	S	<=0.06	S	S	<=0.5	S	S	<=0.5	S	0.06	S	0.06	S	<=1	S	<=2	S	NEG	0.5	S	<=0.25	S	<=0.25	S	<=2	S	<=2	S
2245STDY5486384	6229_99	6229_99	9950_2#87	ACTIVE_BACTERIAL_CORE_SURVEILLANCE	UNITED STATES	MARYLAND	CDC	1999	BACTEREMIA	BLOOD	ERR326502	ERS221871	9899	18	14	4	R	I	8	R	1	R	1	I	S	2	R	I	>2	R	8	R	0.06	S	<=1	S	<=2	S	NEG	>=4	R	<=0.25	S	<=0.25	S	<=2	S	<=2	S
2245STDY5562339	6319_03	6319_03	11822_1#47	ACTIVE_BACTERIAL_CORE_SURVEILLANCE	UNITED STATES	MINNESOTA	CDC	1999	BACTEREMIA	BLOOD	ERR449136	ERS322376	638	50	18C	<=0.03	S	S	<=0.03	S	<=0.06	S	<=0.06	S	S	<=0.5	S	S	<=0.5	S	0.06	S	0.06	S	<=1	S	<=2	S	NEG	0.5	S	<=0.25	S	<=0.25	S	<=2	S	<=2	S
2245STDY5562374	6338_00	6338_00	11511_7#62	ACTIVE_BACTERIAL_CORE_SURVEILLANCE	UNITED STATES	OREGON	CDC	1999	BACTEREMIA	BLOOD	ERR425414	ERS322411	230	10	24F	0.5	R	S	0.12	S	0.12	S	0.12	S	S	<=0.5	S	S	<=0.5	S	>32	R	>2	R	<=1	S	<=2	S	POS	2	I	>8	R	>=1	R	<=2	S	<=2	S
2245STDY5562340	6350_03	6350_03	11511_7#36	ACTIVE_BACTERIAL_CORE_SURVEILLANCE	UNITED STATES	MINNESOTA	CDC	1999	BACTEREMIA	BLOOD	ERR425389	ERS322377	638	50	18C	<=0.03	S	S	<=0.03	S	<=0.06	S	<=0.06	S	S	<=0.5	S	S	<=0.5	S	0.06	S	0.06	S	<=1	S	<=2	S	NEG	0.5	S	<=0.25	S	<=0.25	S	<=2	S	<=2	S
2245STDY5562594	6357_99	6357_99	11657_2#49	ACTIVE_BACTERIAL_CORE_SURVEILLANCE	UNITED STATES	TENNESSEE	CDC	1999	BACTEREMIA	BLOOD	ERR433563	ERS322626	13	18	14	4	R	I	8	R	1	R	1	I	S	2	R	I	>2	R	8	R	0.06	S	<=1	S	<=2	S	NEG	>=4	R	<=0.25	S	<=0.25	S	<=2	S	<=2	S
2245STDY5562524	6378_99	6378_99	11822_1#78	ACTIVE_BACTERIAL_CORE_SURVEILLANCE	UNITED STATES	TENNESSEE	CDC	1999	BACTEREMIA	BLOOD	ERR449167	ERS322558	236	1	19F	4	R	I	2	S	0.5	I	2	R	I	1	I	S	>2	R	8	R	0.06	S	<=1	S	<=2	S	NEG	>=4	R	>8	R	>=1	R	<=2	S	<=2	S
2245STDY5562254	6379_99	6379_99	11822_1#5	ACTIVE_BACTERIAL_CORE_SURVEILLANCE	UNITED STATES	TENNESSEE	CDC	1999	BACTEREMIA	BLOOD	ERR449097	ERS322294	643	6	9V	0.25	R	S	0.25	S	0.12	S	0.12	S	S	<=0.5	S	S	1	I	0.06	S	0.06	S	<=1	S	<=2	S	NEG	0.5	S	<=0.25	S	<=0.25	S	<=2	S	<=2	S
2245STDY5486231	6752_04	6752_04	9950_1#43	ACTIVE_BACTERIAL_CORE_SURVEILLANCE	UNITED STATES	MARYLAND	CDC	2003	BACTEREMIA	BLOOD	ERR326367	ERS221721	3290	36	10A	<=0.03	S	S	<=0.03	S	<=0.06	S	<=0.06	S	S	<=0.5	S	S	<=0.5	S	FLAG	FLAG	FLAG	FLAG	FLAG	FLAG	FLAG	FLAG	FLAG	0.5	S	<=0.25	S	<=0.25	S	<=2	S	<=2	S
2245STDY5562344	6972_03	6972_03	11822_1#50	ACTIVE_BACTERIAL_CORE_SURVEILLANCE	UNITED STATES	MINNESOTA	CDC	1999	BACTEREMIA	BLOOD	ERR449139	ERS322381	1757	4	19F	<=0.03	S	S	<=0.03	S	<=0.06	S	<=0.06	S	S	<=0.5	S	S	<=0.5	S	0.06	S	0.06	S	<=1	S	<=2	S	NEG	0.5	S	<=0.25	S	<=0.25	S	<=2	S	<=2	S
2245STDY5486391	7074_99	7074_99	9950_3#2	ACTIVE_BACTERIAL_CORE_SURVEILLANCE	UNITED STATES	NEW YORK	CDC	1999	BACTEREMIA	BLOOD	ERR326508	ERS221877	13	18	14	<=0.03	S	S	<=0.03	S	<=0.06	S	<=0.06	S	S	<=0.5	S	S	<=0.5	S	0.06	S	0.06	S	<=1	S	<=2	S	NEG	0.5	S	<=0.25	S	<=0.25	S	<=2	S	<=2	S
2245STDY5562351	7102_99	7102_99	11822_1#54	ACTIVE_BACTERIAL_CORE_SURVEILLANCE	UNITED STATES	NEW YORK	CDC	1999	BACTEREMIA	BLOOD	ERR449143	ERS322388	191	15	7F	<=0.03	S	S	<=0.03	S	<=0.06	S	<=0.06	S	S	<=0.5	S	S	<=0.5	S	0.06	S	0.06	S	<=1	S	<=2	S	NEG	0.5	S	<=0.25	S	<=0.25	S	<=2	S	<=2	S
2245STDY5562375	7114_99	7114_99	11511_7#63	ACTIVE_BACTERIAL_CORE_SURVEILLANCE	UNITED STATES	NEW YORK	CDC	1999	BACTEREMIA	BLOOD	ERR425415	ERS322412	659	135	16F	<=0.03	S	S	<=0.03	S	<=0.06	S	<=0.06	S	S	<=0.5	S	S	<=0.5	S	0.06	S	0.06	S	<=1	S	<=2	S	NEG	0.5	S	<=0.25	S	<=0.25	S	<=2	S	<=2	S
2245STDY5562376	7116_99	7116_99	11511_7#64	ACTIVE_BACTERIAL_CORE_SURVEILLANCE	UNITED STATES	NEW YORK	CDC	1999	BACTEREMIA	BLOOD	ERR425416	ERS322413	124	39	14	<=0.03	S	S	<=0.03	S	<=0.06	S	<=0.06	S	S	<=0.5	S	S	<=0.5	S	0.06	S	0.06	S	<=1	S	<=2	S	NEG	0.5	S	<=0.25	S	<=0.25	S	<=2	S	<=2	S
2245STDY5562379	7143_99	7143_99	11511_7#67	ACTIVE_BACTERIAL_CORE_SURVEILLANCE	UNITED STATES	NEW YORK	CDC	1999	BACTEREMIA	BLOOD	ERR425419	ERS322416	695	27	4	<=0.03	S	S	<=0.03	S	<=0.06	S	<=0.06	S	S	<=0.5	S	S	<=0.5	S	8	R	0.06	S	<=1	S	<=2	S	NEG	0.5	S	<=0.25	S	<=0.25	S	<=2	S	<=2	S
2245STDY5562382	7151_99	7151_99	11511_7#70	ACTIVE_BACTERIAL_CORE_SURVEILLANCE	UNITED STATES	NEW YORK	CDC	1999	BACTEREMIA	BLOOD	ERR425422	ERS322419	632	16	18C	<=0.03	S	S	<=0.03	S	<=0.06	S	<=0.06	S	S	<=0.5	S	S	<=0.5	S	0.06	S	0.06	S	<=1	S	<=2	S	NEG	0.5	S	<=0.25	S	<=0.25	S	<=2	S	<=2	S
2245STDY5562383	7175_99	7175_99	11511_7#71	ACTIVE_BACTERIAL_CORE_SURVEILLANCE	UNITED STATES	NEW YORK	CDC	1999	BACTEREMIA	BLOOD	ERR425423	ERS322420	473	13	6A	0.5	R	S	0.25	S	<=0.06	S	0.25	S	S	<=0.5	S	S	1	I	8	R	0.06	S	<=1	S	<=2	S	NEG	0.5	S	<=0.25	S	<=0.25	S	<=2	S	<=2	S
2245STDY5609130	7328_99	7328_99	11657_4#46	ACTIVE_BACTERIAL_CORE_SURVEILLANCE	UNITED STATES	GEORGIA	CDC	1999	BACTEREMIA	BLOOD	ERR433644	ERS356500	656	39	14	<=0.03	S	S	<=0.03	S	<=0.06	S	<=0.06	S	S	<=0.5	S	S	<=0.5	S	8	R	0.06	S	<=1	S	<=2	S	NEG	2	I	>8	R	>=1	R	<=2	S	>=8	R
2245STDY5562635	7455_99	7455_99	11657_2#78	ACTIVE_BACTERIAL_CORE_SURVEILLANCE	UNITED STATES	GEORGIA	CDC	1999	BACTEREMIA	BLOOD	ERR433592	ERS322664	376	97	6A	2	R	S	1	S	0.5	I	0.5	S	S	1	I	S	>2	R	8	R	0.06	S	<=1	S	<=2	S	NEG	>=4	R	<=0.25	S	<=0.25	S	<=2	S	<=2	S
2245STDY5486279	7509_06	7509_06	9950_1#90	ACTIVE_BACTERIAL_CORE_SURVEILLANCE	UNITED STATES	OREGON	CDC	2006	BACTEREMIA	BLOOD	ERR326414	ERS221768	199	4	15B/15C	<=0.03	S	S	<=0.03	S	<=0.06	S	<=0.06	S	S	<=0.5	S	S	<=0.5	S	0.06	S	0.06	S	<=1	S	<=2	S	NEG	0.5	S	<=0.25	S	<=0.25	S	FLAG	FLAG	<=2	S
2245STDY5562473	7534_99	7534_99	11826_1#61	ACTIVE_BACTERIAL_CORE_SURVEILLANCE	UNITED STATES	GEORGIA	CDC	1999	BACTEREMIA	BLOOD	ERR449247	ERS322507	376	97	6A	2	R	S	1	S	0.5	I	0.5	S	S	1	I	S	>2	R	8	R	0.06	S	<=1	S	<=2	S	NEG	>=4	R	<=0.25	S	<=0.25	S	<=2	S	<=2	S
2245STDY5486456	7536_99	7536_99	9950_3#67	ACTIVE_BACTERIAL_CORE_SURVEILLANCE	UNITED STATES	GEORGIA	CDC	1999	BACTEREMIA	BLOOD	ERR326573	ERS221942	13	18	14	4	R	I	8	R	1	R	1	I	S	2	R	I	>2	R	8	R	0.06	S	<=1	S	<=2	S	NEG	>=4	R	<=0.25	S	<=0.25	S	<=2	S	<=2	S
2245STDY5486217	7541_06	7541_06	9950_1#29	ACTIVE_BACTERIAL_CORE_SURVEILLANCE	UNITED STATES	GEORGIA	CDC	2006	BACTEREMIA	BLOOD	ERR326353	ERS221707	180	12	3	<=0.03	S	S	<=0.03	S	<=0.06	S	<=0.06	S	S	<=0.5	S	S	<=0.5	S	0.06	S	0.06	S	<=1	S	<=2	S	NEG	0.5	S	<=0.25	S	<=0.25	S	<=2	S	<=2	S
2245STDY5562514	7617_99	7617_99	11657_2#2	ACTIVE_BACTERIAL_CORE_SURVEILLANCE	UNITED STATES	MARYLAND	CDC	1999	BACTEREMIA	BLOOD	ERR433523	ERS322548	113	50	18C	<=0.03	S	S	<=0.03	S	<=0.06	S	<=0.06	S	S	<=0.5	S	S	<=0.5	S	0.06	S	0.06	S	<=1	S	<=2	S	NEG	0.5	S	<=0.25	S	<=0.25	S	<=2	S	<=2	S
2245STDY5486200	7701_07	7701_07	9950_1#12	ACTIVE_BACTERIAL_CORE_SURVEILLANCE	UNITED STATES	CONNECTICUT	CDC	2006	BACTEREMIA	BLOOD	ERR326336	ERS221690	498	36	35F	<=0.03	S	S	<=0.03	S	<=0.06	S	<=0.06	S	S	<=0.5	S	S	<=0.5	S	0.06	S	0.06	S	<=1	S	<=2	S	NEG	0.5	S	<=0.25	S	<=0.25	S	<=2	S	<=2	S
2245STDY5562480	7721_99	7721_99	11822_1#65	ACTIVE_BACTERIAL_CORE_SURVEILLANCE	UNITED STATES	TENNESSEE	CDC	1999	BACTEREMIA	BLOOD	ERR449154	ERS322514	81	16	19F	2	R	S	2	S	0.5	I	1	I	S	1	I	S	>2	R	>32	R	>2	R	<=1	S	<=2	S	POS	>=4	R	>8	R	>=1	R	<=2	S	>=8	R
2245STDY5486425	7802_99	7802_99	9950_3#36	ACTIVE_BACTERIAL_CORE_SURVEILLANCE	UNITED STATES	OREGON	CDC	1999	BACTEREMIA	BLOOD	ERR326542	ERS221911	1421	1	19F	2	R	S	2	S	0.5	I	1	I	S	1	I	S	>2	R	>32	R	>2	R	<=1	S	<=2	S	POS	>=4	R	>8	R	>=1	R	<=2	S	<=2	S
2245STDY5486433	7804_99	7804_99	9950_3#44	ACTIVE_BACTERIAL_CORE_SURVEILLANCE	UNITED STATES	OREGON	CDC	1999	BACTEREMIA	BLOOD	ERR326550	ERS221919	3037	76	6B	<=0.03	S	S	0.06	S	<=0.06	S	<=0.06	S	S	<=0.5	S	S	<=0.5	S	0.06	S	0.06	S	<=1	S	<=2	S	NEG	>=4	R	<=0.25	S	<=0.25	S	<=2	S	<=2	S
2245STDY5486263	7853_05	7853_05	9950_1#75	ACTIVE_BACTERIAL_CORE_SURVEILLANCE	UNITED STATES	MINNESOTA	CDC	2005	BACTEREMIA	BLOOD	ERR326399	ERS221753	639	24	6C	<=0.03	S	S	<=0.03	S	<=0.06	S	<=0.06	S	S	<=0.5	S	S	<=0.5	S	>32	R	1	R	<=1	S	<=2	S	POS	0.5	S	<=0.25	S	<=0.25	S	<=2	S	<=2	S
2245STDY5562255	7875_99	7875_99	11822_1#6	ACTIVE_BACTERIAL_CORE_SURVEILLANCE	UNITED STATES	GEORGIA	CDC	1999	BACTEREMIA	BLOOD	ERR449098	ERS322295	13	18	14	4	R	I	8	R	1	R	1	I	S	2	R	I	>2	R	8	R	0.06	S	<=1	S	<=2	S	NEG	>=4	R	<=0.25	S	<=0.25	S	<=2	S	<=2	S
2245STDY5486272	8871_04	8871_04	9950_1#84	ACTIVE_BACTERIAL_CORE_SURVEILLANCE	UNITED STATES	MARYLAND	CDC	2004	BACTEREMIA	BLOOD	ERR326408	ERS221762	180	12	3	<=0.03	S	S	<=0.03	S	<=0.06	S	<=0.06	S	S	<=0.5	S	S	<=0.5	S	0.06	S	0.06	S	<=1	S	<=2	S	NEG	0.5	S	>8	R	>=1	R	<=2	S	>=8	R
2245STDY5486255	9764_04	9764_04	9950_1#67	ACTIVE_BACTERIAL_CORE_SURVEILLANCE	UNITED STATES	NEW YORK	CDC	2004	BACTEREMIA	BLOOD	ERR326391	ERS221745	547	45	34	<=0.03	S	S	<=0.03	S	<=0.06	S	<=0.06	S	S	<=0.5	S	S	<=0.5	S	>32	R	1	R	<=1	S	<=2	S	POS	0.5	S	<=0.25	S	<=0.25	S	<=2	S	<=2	S
2245STDY6179456	0046_99	GPS_US0046_99_R1	19084_8#143	ACTIVE_BACTERIAL_CORE_SURVEILLANCE	UNITED STATES	NEW YORK	CDC	1998	BACTEREMIA	BLOOD	ERR1422656	ERS1021629	251	119	19F	<=0.03	S	S	<=0.03	S	<=0.06	S	<=0.06	S	S	<=0.5	S	S	<=0.5	S	0.06	S	0.06	S	<=1	S	<=2	S	NEG	0.5	S	<=0.25	S	<=0.25	S	<=2	S	<=2	S
2245STDY6179471	0129_99	GPS_US0129_99_R1	19084_8#158	ACTIVE_BACTERIAL_CORE_SURVEILLANCE	UNITED STATES	OREGON	CDC	1998	BACTEREMIA	BLOOD	ERR1422671	ERS1021644	651	1	19F	2	R	S	2	S	0.5	I	1	I	S	1	I	S	>2	R	8	R	0.06	S	<=1	S	<=2	S	NEG	>=4	R	>8	R	>=1	R	<=2	S	<=2	S
2245STDY6179496	0212_02	GPS_US0212_02_R1	19084_8#183	ACTIVE_BACTERIAL_CORE_SURVEILLANCE	UNITED STATES	TENNESSEE	CDC	2001	BACTEREMIA	BLOOD	ERR1422696	ERS1021669	473	13	6A	0.12	R	S	0.06	S	<=0.06	S	0.12	S	S	<=0.5	S	S	<=0.5	S	8	R	0.06	S	<=1	S	<=2	S	NEG	0.5	S	<=0.25	S	<=0.25	S	<=2	S	<=2	S
2245STDY6179455	0517_99	GPS_US0517_99_R1	19084_8#142	ACTIVE_BACTERIAL_CORE_SURVEILLANCE	UNITED STATES	CONNECTICUT	CDC	1998	BACTEREMIA	BLOOD	ERR1422655	ERS1021628	138	24	6B	<=0.03	S	S	<=0.03	S	<=0.06	S	<=0.06	S	S	<=0.5	S	S	<=0.5	S	0.06	S	0.06	S	<=1	S	<=2	S	NEG	0.5	S	<=0.25	S	<=0.25	S	<=2	S	<=2	S
2245STDY6179460	0937_00	GPS_US0937_00_R1	19084_8#147	ACTIVE_BACTERIAL_CORE_SURVEILLANCE	UNITED STATES	CONNECTICUT	CDC	1999	BACTEREMIA	BLOOD	ERR1422660	ERS1021633	496	3	18C	<=0.03	S	S	<=0.03	S	<=0.06	S	<=0.06	S	S	<=0.5	S	S	<=0.5	S	0.06	S	0.06	S	<=1	S	<=2	S	NEG	0.5	S	<=0.25	S	<=0.25	S	<=2	S	<=2	S
2245STDY6179459	1017_00	GPS_US1017_00_R1	19084_8#146	ACTIVE_BACTERIAL_CORE_SURVEILLANCE	UNITED STATES	GEORGIA	CDC	1999	BACTEREMIA	BLOOD	ERR1422659	ERS1021632	2456	23	6B	1	R	S	2	S	0.5	I	0.5	S	S	1	I	S	2	R	8	R	0.06	S	<=1	S	<=2	S	NEG	>=4	R	<=0.25	S	<=0.25	S	<=2	S	<=2	S
2245STDY6179467	3306_98	GPS_US3306_98_R1	19084_8#154	ACTIVE_BACTERIAL_CORE_SURVEILLANCE	UNITED STATES	GEORGIA	CDC	1998	BACTEREMIA	BLOOD	ERR1422667	ERS1021640	113	50	18C	<=0.03	S	S	<=0.03	S	<=0.06	S	<=0.06	S	S	<=0.5	S	S	<=0.5	S	0.06	S	0.06	S	<=1	S	<=2	S	NEG	0.5	S	<=0.25	S	<=0.25	S	<=2	S	<=2	S
2245STDY6179466	3313_00	GPS_US3313_00_R1	19084_8#153	ACTIVE_BACTERIAL_CORE_SURVEILLANCE	UNITED STATES	CONNECTICUT	CDC	1999	BACTEREMIA	BLOOD	ERR1422666	ERS1021639	1340	119	19F	<=0.03	S	S	<=0.03	S	<=0.06	S	<=0.06	S	S	<=0.5	S	S	<=0.5	S	0.06	S	0.06	S	<=1	S	<=2	S	NEG	0.5	S	<=0.25	S	<=0.25	S	<=2	S	<=2	S
2245STDY6179463	3903_99	GPS_US3903_99_R1	19084_8#150	ACTIVE_BACTERIAL_CORE_SURVEILLANCE	UNITED STATES	GEORGIA	CDC	1999	BACTEREMIA	BLOOD	ERR1422663	ERS1021636	13	18	14	4	R	I	8	R	1	R	1	I	S	2	R	I	>2	R	8	R	0.06	S	<=1	S	<=2	S	NEG	>=4	R	<=0.25	S	<=0.25	S	<=2	S	<=2	S
2245STDY6179469	4178_99	GPS_US4178_99_R1	19084_8#156	ACTIVE_BACTERIAL_CORE_SURVEILLANCE	UNITED STATES	GEORGIA	CDC	1999	BACTEREMIA	BLOOD	ERR1422669	ERS1021642	220	32	12F	<=0.03	S	S	<=0.03	S	<=0.06	S	<=0.06	S	S	<=0.5	S	S	<=0.5	S	0.06	S	0.06	S	<=1	S	<=2	S	NEG	0.5	S	<=0.25	S	<=0.25	S	<=2	S	<=2	S
2245STDY6179457	4551_99	GPS_US4551_99_R1	19084_8#144	ACTIVE_BACTERIAL_CORE_SURVEILLANCE	UNITED STATES	MARYLAND	CDC	1998	BACTEREMIA	BLOOD	ERR1422657	ERS1021630	1340	119	19F	<=0.03	S	S	<=0.03	S	<=0.06	S	<=0.06	S	S	<=0.5	S	S	<=0.5	S	0.06	S	0.06	S	<=1	S	<=2	S	NEG	0.5	S	<=0.25	S	<=0.25	S	<=2	S	<=2	S
2245STDY6179465	5256_03	GPS_US5256_03_R1	19084_8#152	ACTIVE_BACTERIAL_CORE_SURVEILLANCE	UNITED STATES	MINNESOTA	CDC	1999	BACTEREMIA	BLOOD	ERR1422665	ERS1021638	124	39	14	<=0.03	S	S	<=0.03	S	<=0.06	S	<=0.06	S	S	<=0.5	S	S	<=0.5	S	0.06	S	0.06	S	<=1	S	<=2	S	NEG	0.5	S	<=0.25	S	<=0.25	S	<=2	S	<=2	S
2245STDY6179461	6006_99	GPS_US6006_99_R1	19084_8#148	ACTIVE_BACTERIAL_CORE_SURVEILLANCE	UNITED STATES	GEORGIA	CDC	1999	BACTEREMIA	BLOOD	ERR1422661	ERS1021634	156	6	9V	2	R	S	2	S	0.5	I	1	I	S	1	I	S	>2	R	0.06	S	0.06	S	<=1	S	<=2	S	NEG	>=4	R	<=0.25	S	<=0.25	S	<=2	S	<=2	S
2245STDY6179473	6305_03	GPS_US6305_03_R1	19084_8#160	ACTIVE_BACTERIAL_CORE_SURVEILLANCE	UNITED STATES	MINNESOTA	CDC	1999	BACTEREMIA	BLOOD	ERR1422673	ERS1021646	671	6	14	0.12	R	S	0.12	S	0.12	S	0.12	S	S	<=0.5	S	S	<=0.5	S	8	R	0.06	S	<=1	S	<=2	S	NEG	>=4	R	<=0.25	S	<=0.25	S	<=2	S	<=2	S
2245STDY6179383	6650_06	GPS_US6650_06_R1	19084_8#119	ACTIVE_BACTERIAL_CORE_SURVEILLANCE	UNITED STATES	NEW MEXICO	CDC	2005	BACTEREMIA	BLOOD	ERR1422632	ERS1021605	53	3	8	<=0.03	S	S	<=0.03	S	<=0.06	S	<=0.06	S	S	<=0.5	S	S	<=0.5	S	0.06	S	0.06	S	<=1	S	<=2	S	NEG	0.5	S	<=0.25	S	<=0.25	S	<=2	S	<=2	S
2245STDY5982534	0165_01	GPS_US_0165_01	14673_2#9	ACTIVE_BACTERIAL_CORE_SURVEILLANCE	UNITED STATES	GEORGIA	CDC	2000	BACTEREMIA	BLOOD	ERR742429	ERS558123	81	16	19F	2	R	S	2	S	0.5	I	1	I	S	1	I	S	>2	R	0.06	S	0.06	S	<=1	S	<=2	S	NEG	>=4	R	<=0.25	S	<=0.25	S	<=2	S	<=2	S
2245STDY5982535	0181_01	GPS_US_0181_01	14673_2#10	ACTIVE_BACTERIAL_CORE_SURVEILLANCE	UNITED STATES	GEORGIA	CDC	2000	BACTEREMIA	BLOOD	ERR742430	ERS558124	13	18	14	4	R	I	8	R	1	R	1	I	S	2	R	I	>2	R	8	R	0.06	S	<=1	S	<=2	S	NEG	>=4	R	<=0.25	S	<=0.25	S	<=2	S	<=2	S
2245STDY6020216	0227_99	GPS_US_0227_99_R1	15608_2#59	ACTIVE_BACTERIAL_CORE_SURVEILLANCE	UNITED STATES	CALIFORNIA	CDC	1998	BACTEREMIA	BLOOD	ERR876489	ERS628652	639	24	6B	0.12	R	S	0.06	S	<=0.06	S	0.12	S	S	<=0.5	S	S	<=0.5	S	0.06	S	0.06	S	<=1	S	<=2	S	NEG	2	I	<=0.25	S	<=0.25	S	<=2	S	<=2	S
2245STDY6020226	0250_00	GPS_US_0250_00_R1	15608_2#69	ACTIVE_BACTERIAL_CORE_SURVEILLANCE	UNITED STATES	GEORGIA	CDC	1999	BACTEREMIA	BLOOD	ERR876499	ERS628662	36	7	23F	<=0.03	S	S	<=0.03	S	<=0.06	S	<=0.06	S	S	<=0.5	S	S	<=0.5	S	0.06	S	0.06	S	<=1	S	<=2	S	NEG	0.5	S	<=0.25	S	<=0.25	S	<=2	S	<=2	S
2245STDY5982592	0265_02	GPS_US_0265_02	14673_2#67	ACTIVE_BACTERIAL_CORE_SURVEILLANCE	UNITED STATES	TENNESSEE	CDC	2001	BACTEREMIA	BLOOD	ERR742480	ERS558181	37	7	23F	4	R	I	8	R	>1	R	8	R	R	4	R	R	>2	R	0.06	S	0.06	S	<=1	S	<=2	S	NEG	>=4	R	<=0.25	S	<=0.25	S	<=2	S	<=2	S
2245STDY5982542	0525_01	GPS_US_0525_01	14673_2#17	ACTIVE_BACTERIAL_CORE_SURVEILLANCE	UNITED STATES	MARYLAND	CDC	2000	BACTEREMIA	BLOOD	ERR742436	ERS558131	1269	6	9V	<=0.03	S	S	<=0.03	S	<=0.06	S	<=0.06	S	S	<=0.5	S	S	<=0.5	S	0.06	S	0.06	S	<=1	S	<=2	S	NEG	0.5	S	<=0.25	S	<=0.25	S	<=2	S	<=2	S
2245STDY5982447	0536_02	GPS_US_0536_02	14673_1#18	ACTIVE_BACTERIAL_CORE_SURVEILLANCE	UNITED STATES	GEORGIA	CDC	2001	BACTEREMIA	BLOOD	ERR742351	ERS558037	220	32	12F	<=0.03	S	S	<=0.03	S	<=0.06	S	<=0.06	S	S	<=0.5	S	S	<=0.5	S	0.06	S	0.06	S	<=1	S	<=2	S	NEG	0.5	S	<=0.25	S	<=0.25	S	<=2	S	<=2	S
2245STDY6020200	0667_00	GPS_US_0667_00_R1	15608_2#43	ACTIVE_BACTERIAL_CORE_SURVEILLANCE	UNITED STATES	CONNECTICUT	CDC	1999	BACTEREMIA	BLOOD	ERR876473	ERS628636	1269	6	9V	<=0.03	S	S	<=0.03	S	<=0.06	S	<=0.06	S	S	<=0.5	S	S	<=0.5	S	0.06	S	0.06	S	<=1	S	<=2	S	NEG	0.5	S	<=0.25	S	<=0.25	S	<=2	S	<=2	S
2245STDY6020201	0683_00	GPS_US_0683_00_R1	15608_2#44	ACTIVE_BACTERIAL_CORE_SURVEILLANCE	UNITED STATES	GEORGIA	CDC	1999	BACTEREMIA	BLOOD	ERR876474	ERS628637	177	44	19F	<=0.03	S	S	<=0.03	S	<=0.06	S	<=0.06	S	S	<=0.5	S	S	<=0.5	S	8	R	0.06	S	<=1	S	<=2	S	NEG	2	I	<=0.25	S	<=0.25	S	<=2	S	<=2	S
2245STDY5982544	0993_01	GPS_US_0993_01	14673_2#19	ACTIVE_BACTERIAL_CORE_SURVEILLANCE	UNITED STATES	GEORGIA	CDC	2000	BACTEREMIA	BLOOD	ERR742438	ERS558133	439	7	23F	<=0.03	S	S	<=0.03	S	<=0.06	S	<=0.06	S	S	<=0.5	S	S	<=0.5	S	0.06	S	0.06	S	<=1	S	<=2	S	NEG	0.5	S	<=0.25	S	<=0.25	S	<=2	S	<=2	S
2245STDY6020222	1148_98	GPS_US_1148_98_R1	15608_2#65	ACTIVE_BACTERIAL_CORE_SURVEILLANCE	UNITED STATES	GEORGIA	CDC	1998	BACTEREMIA	BLOOD	ERR876495	ERS628658	1012	3	33F	<=0.03	S	S	<=0.03	S	<=0.06	S	<=0.06	S	S	<=0.5	S	S	<=0.5	S	0.06	S	0.06	S	<=1	S	<=2	S	NEG	0.5	S	<=0.25	S	<=0.25	S	<=2	S	<=2	S
2245STDY6020171	1194_99	GPS_US_1194_99_R1	15608_2#14	ACTIVE_BACTERIAL_CORE_SURVEILLANCE	UNITED STATES	GEORGIA	CDC	1998	BACTEREMIA	BLOOD	ERR876444	ERS628607	162	6	19F	<=0.03	S	S	<=0.03	S	<=0.06	S	<=0.06	S	S	<=0.5	S	S	<=0.5	S	0.06	S	0.06	S	<=1	S	<=2	S	NEG	0.5	S	<=0.25	S	<=0.25	S	<=2	S	<=2	S
2245STDY5982547	1209_02	GPS_US_1209_02	15277_1#13	ACTIVE_BACTERIAL_CORE_SURVEILLANCE	UNITED STATES	COLORADO	CDC	2001	BACTEREMIA	BLOOD	ERR845746	ERS558136	199	4	19A	0.5	R	S	0.25	S	<=0.06	S	0.5	S	S	<=0.5	S	S	2	R	8	R	0.06	S	<=1	S	<=2	S	NEG	>=4	R	<=0.25	S	<=0.25	S	<=2	S	<=2	S
2245STDY6020250	1220_99	GPS_US_1220_99_R1	15608_2#93	ACTIVE_BACTERIAL_CORE_SURVEILLANCE	UNITED STATES	GEORGIA	CDC	1998	BACTEREMIA	BLOOD	ERR876523	ERS628710	1257	124	20B	<=0.03	S	S	<=0.03	S	<=0.06	S	<=0.06	S	S	<=0.5	S	S	<=0.5	S	>32	R	1	R	<=1	S	<=2	S	POS	0.5	S	<=0.25	S	<=0.25	S	<=2	S	<=2	S
2245STDY6020209	1311_99	GPS_US_1311_99_R1	15608_2#52	ACTIVE_BACTERIAL_CORE_SURVEILLANCE	UNITED STATES	GEORGIA	CDC	1998	BACTEREMIA	BLOOD	ERR876482	ERS628645	393	38	38	<=0.03	S	S	<=0.03	S	<=0.06	S	<=0.06	S	S	<=0.5	S	S	<=0.5	S	0.06	S	0.06	S	<=1	S	<=2	S	NEG	0.5	S	<=0.25	S	<=0.25	S	<=2	S	<=2	S
2245STDY6179433	1361_00	GPS_US_1361_00_R1	19084_8#120	ACTIVE_BACTERIAL_CORE_SURVEILLANCE	UNITED STATES	NEW YORK	CDC	1999	BACTEREMIA	BLOOD	ERR1422633	ERS1021606	138	24	6B	<=0.03	S	S	<=0.03	S	<=0.06	S	<=0.06	S	S	<=0.5	S	S	<=0.5	S	>32	R	1	R	<=1	S	<=2	S	POS	0.5	S	<=0.25	S	<=0.25	S	<=2	S	<=2	S
2245STDY6020215	1457_00	GPS_US_1457_00_R1	15608_2#58	ACTIVE_BACTERIAL_CORE_SURVEILLANCE	UNITED STATES	NEW YORK	CDC	1999	BACTEREMIA	BLOOD	ERR876488	ERS628651	12754	3	33F	<=0.03	S	S	<=0.03	S	<=0.06	S	<=0.06	S	S	<=0.5	S	S	<=0.5	S	0.06	S	0.06	S	<=1	S	<=2	S	NEG	0.5	S	<=0.25	S	<=0.25	S	<=2	S	<=2	S
2245STDY6020168	1553_99	GPS_US_1553_99_R1	15608_2#11	ACTIVE_BACTERIAL_CORE_SURVEILLANCE	UNITED STATES	TENNESSEE	CDC	1998	BACTEREMIA	BLOOD	ERR876441	ERS628604	13	18	14	4	R	I	8	R	1	R	1	I	S	2	R	I	>2	R	8	R	0.06	S	<=1	S	<=2	S	NEG	>=4	R	<=0.25	S	<=0.25	S	<=2	S	<=2	S
2245STDY6020164	1554_00	GPS_US_1554_00_R1	15608_2#7	ACTIVE_BACTERIAL_CORE_SURVEILLANCE	UNITED STATES	GEORGIA	CDC	1999	BACTEREMIA	BLOOD	ERR876437	ERS628600	13	18	14	4	R	I	8	R	1	R	1	I	S	2	R	I	>2	R	8	R	0.06	S	<=1	S	<=2	S	NEG	>=4	R	<=0.25	S	<=0.25	S	<=2	S	<=2	S
2245STDY6020170	1564_99	GPS_US_1564_99_R1	15608_2#13	ACTIVE_BACTERIAL_CORE_SURVEILLANCE	UNITED STATES	TENNESSEE	CDC	1998	BACTEREMIA	BLOOD	ERR876443	ERS628606	13	18	14	4	R	I	8	R	1	R	1	I	S	2	R	I	>2	R	8	R	0.06	S	<=1	S	<=2	S	NEG	>=4	R	<=0.25	S	<=0.25	S	<=2	S	<=2	S
2245STDY6020269	1696_98	GPS_US_1696_98_R1	15608_3#16	ACTIVE_BACTERIAL_CORE_SURVEILLANCE	UNITED STATES	CALIFORNIA	CDC	1998	BACTEREMIA	BLOOD	ERR876541	ERS628716	124	39	14	0.06	S	S	<=0.03	S	<=0.06	S	<=0.06	S	S	<=0.5	S	S	<=0.5	S	0.06	S	0.06	S	<=1	S	<=2	S	NEG	0.5	S	<=0.25	S	<=0.25	S	<=2	S	<=2	S
2245STDY6020162	1769_00	GPS_US_1769_00_R1	15608_2#5	ACTIVE_BACTERIAL_CORE_SURVEILLANCE	UNITED STATES	CONNECTICUT	CDC	1999	BACTEREMIA	BLOOD	ERR876435	ERS628598	124	39	14	<=0.03	S	S	<=0.03	S	<=0.06	S	<=0.06	S	S	<=0.5	S	S	<=0.5	S	0.06	S	0.06	S	<=1	S	<=2	S	NEG	0.5	S	<=0.25	S	<=0.25	S	<=2	S	<=2	S
2245STDY6020192	1813_98	GPS_US_1813_98_R1	15608_2#35	ACTIVE_BACTERIAL_CORE_SURVEILLANCE	UNITED STATES	GEORGIA	CDC	1998	BACTEREMIA	BLOOD	ERR876465	ERS628628	13	18	14	<=0.03	S	S	<=0.03	S	<=0.06	S	0.12	S	S	<=0.5	S	S	<=0.5	S	8	R	0.06	S	<=1	S	<=2	S	NEG	>=4	R	<=0.25	S	<=0.25	S	<=2	S	<=2	S
2245STDY6020163	1851_00	GPS_US_1851_00_R1	15608_2#6	ACTIVE_BACTERIAL_CORE_SURVEILLANCE	UNITED STATES	NEW YORK	CDC	1999	BACTEREMIA	BLOOD	ERR876436	ERS628599	460	64	6A	0.06	S	S	<=0.03	S	<=0.06	S	<=0.06	S	S	<=0.5	S	S	<=0.5	S	0.06	S	0.06	S	<=1	S	<=2	S	NEG	>=4	R	<=0.25	S	<=0.25	S	<=2	S	<=2	S
2245STDY5982648	1864_01	GPS_US_1864_01	15277_1#24	ACTIVE_BACTERIAL_CORE_SURVEILLANCE	UNITED STATES	NEW YORK	CDC	2000	BACTEREMIA	BLOOD	ERR845757	ERS558236	1379	89	6C	<=0.03	S	S	<=0.03	S	<=0.06	S	<=0.06	S	S	<=0.5	S	S	<=0.5	S	0.06	S	0.06	S	<=1	S	<=2	S	NEG	0.5	S	<=0.25	S	<=0.25	S	<=2	S	<=2	S
2245STDY6020274	1953_00	GPS_US_1953_00_R1	15608_3#21	ACTIVE_BACTERIAL_CORE_SURVEILLANCE	UNITED STATES	OREGON	CDC	1999	BACTEREMIA	BLOOD	ERR876546	ERS628722	12756	23	6B	<=0.03	S	S	<=0.03	S	<=0.06	S	<=0.06	S	S	<=0.5	S	S	<=0.5	S	0.06	S	0.06	S	<=1	S	<=2	S	NEG	0.5	S	<=0.25	S	<=0.25	S	<=2	S	<=2	S
2245STDY5982496	2008004334	GPS_US_2008004334	14673_1#67	ACTIVE_BACTERIAL_CORE_SURVEILLANCE	UNITED STATES	MINNESOTA	CDC	2007	BACTEREMIA	BLOOD	ERR742392	ERS558086	320	1	19A	4	R	I	8	R	1	R	2	R	I	2	R	I	>2	R	>32	R	>2	R	<=1	S	<=2	S	POS	>=4	R	>8	R	>=1	R	<=2	S	<=2	S
2245STDY5982497	2008008385	GPS_US_2008008385	14673_1#68	ACTIVE_BACTERIAL_CORE_SURVEILLANCE	UNITED STATES	CALIFORNIA	CDC	2007	BACTEREMIA	BLOOD	ERR742393	ERS558087	1390	111	6C	<=0.03	S	S	<=0.03	S	<=0.06	S	<=0.06	S	S	<=0.5	S	S	<=0.5	S	0.06	S	0.06	S	<=1	S	<=2	S	NEG	0.5	S	<=0.25	S	<=0.25	S	<=2	S	<=2	S
2245STDY5982705	2008227206	GPS_US_2008227206	14673_3#84	ACTIVE_BACTERIAL_CORE_SURVEILLANCE	UNITED STATES	NEW YORK	CDC	2008	BACTEREMIA	BLOOD	ERR742585	ERS558293	199	4	19A	0.12	R	S	0.12	S	<=0.06	S	<=0.06	S	S	<=0.5	S	S	<=0.5	S	8	R	0.06	S	<=1	S	<=2	S	NEG	0.5	S	<=0.25	S	<=0.25	S	<=2	S	<=2	S
2245STDY5982622	2008227516	GPS_US_2008227516	14673_3#1	ACTIVE_BACTERIAL_CORE_SURVEILLANCE	UNITED STATES	MINNESOTA	CDC	2007	BACTEREMIA	BLOOD	ERR742504	ERS558210	667	4	19A	<=0.03	S	S	<=0.03	S	<=0.06	S	<=0.06	S	S	<=0.5	S	S	<=0.5	S	0.06	S	0.06	S	<=1	S	<=2	S	NEG	0.5	S	<=0.25	S	<=0.25	S	<=2	S	<=2	S
2245STDY5982623	2008227542	GPS_US_2008227542	14673_3#2	ACTIVE_BACTERIAL_CORE_SURVEILLANCE	UNITED STATES	MINNESOTA	CDC	2007	BACTEREMIA	BLOOD	ERR742505	ERS558211	191	15	7F	<=0.03	S	S	<=0.03	S	<=0.06	S	<=0.06	S	S	<=0.5	S	S	<=0.5	S	0.06	S	0.06	S	<=1	S	<=2	S	NEG	0.5	S	<=0.25	S	<=0.25	S	<=2	S	<=2	S
2245STDY5982502	2008227920	GPS_US_2008227920	14673_1#73	ACTIVE_BACTERIAL_CORE_SURVEILLANCE	UNITED STATES	TENNESSEE	CDC	2007	BACTEREMIA	BLOOD	ERR742398	ERS558092	2705	3	33F	<=0.03	S	S	<=0.03	S	<=0.06	S	<=0.06	S	S	<=0.5	S	S	<=0.5	S	8	R	0.06	S	<=1	S	<=2	S	NEG	2	I	<=0.25	S	<=0.25	S	<=2	S	<=2	S
2245STDY5982508	2008228002	GPS_US_2008228002	14673_1#79	ACTIVE_BACTERIAL_CORE_SURVEILLANCE	UNITED STATES	TENNESSEE	CDC	2008	BACTEREMIA	BLOOD	ERR742404	ERS558098	63	9	15A	0.25	R	S	<=0.03	S	<=0.06	S	0.12	S	S	<=0.5	S	S	<=0.5	S	>32	R	>2	R	<=1	S	<=2	S	POS	0.5	S	>8	R	>=1	R	<=2	S	<=2	S
2245STDY5982509	2008229142	GPS_US_2008229142	14673_1#80	ACTIVE_BACTERIAL_CORE_SURVEILLANCE	UNITED STATES	NEW MEXICO	CDC	2008	BACTEREMIA	BLOOD	ERR742405	ERS558099	452	75	35B	<=0.03	S	S	<=0.03	S	<=0.06	S	<=0.06	S	S	<=0.5	S	S	<=0.5	S	0.06	S	0.06	S	<=1	S	<=2	S	NEG	0.5	S	<=0.25	S	<=0.25	S	<=2	S	<=2	S
2245STDY5982503	2008232452	GPS_US_2008232452	14673_1#74	ACTIVE_BACTERIAL_CORE_SURVEILLANCE	UNITED STATES	MINNESOTA	CDC	2008	BACTEREMIA	BLOOD	ERR742399	ERS558093	1480	98	8	<=0.03	S	S	<=0.03	S	<=0.06	S	<=0.06	S	S	<=0.5	S	S	<=0.5	S	0.06	S	0.06	S	<=1	S	<=2	S	NEG	0.5	S	<=0.25	S	<=0.25	S	<=2	S	<=2	S
2245STDY5982504	2008232504	GPS_US_2008232504	14673_1#75	ACTIVE_BACTERIAL_CORE_SURVEILLANCE	UNITED STATES	MINNESOTA	CDC	2008	BACTEREMIA	BLOOD	ERR742400	ERS558094	393	38	38	<=0.03	S	S	<=0.03	S	<=0.06	S	<=0.06	S	S	<=0.5	S	S	<=0.5	S	0.06	S	0.06	S	<=1	S	<=2	S	NEG	0.5	S	<=0.25	S	<=0.25	S	<=2	S	<=2	S
2245STDY5982505	2008235379	GPS_US_2008235379	14673_1#76	ACTIVE_BACTERIAL_CORE_SURVEILLANCE	UNITED STATES	MINNESOTA	CDC	2008	BACTEREMIA	BLOOD	ERR742401	ERS558095	419	4	19A	0.12	R	S	0.12	S	<=0.06	S	<=0.06	S	S	<=0.5	S	S	<=0.5	S	8	R	0.06	S	<=1	S	<=2	S	NEG	>=4	R	<=0.25	S	<=0.25	S	<=2	S	<=2	S
2245STDY5982506	2008235380	GPS_US_2008235380	14673_1#77	ACTIVE_BACTERIAL_CORE_SURVEILLANCE	UNITED STATES	MINNESOTA	CDC	2008	BACTEREMIA	BLOOD	ERR742402	ERS558096	191	15	7F	<=0.03	S	S	<=0.03	S	<=0.06	S	<=0.06	S	S	<=0.5	S	S	<=0.5	S	0.06	S	0.06	S	<=1	S	<=2	S	NEG	0.5	S	<=0.25	S	<=0.25	S	<=2	S	<=2	S
2245STDY5982519	2008236096	GPS_US_2008236096	14673_1#90	ACTIVE_BACTERIAL_CORE_SURVEILLANCE	UNITED STATES	MARYLAND	CDC	2008	BACTEREMIA	BLOOD	ERR742415	ERS558109	558	59	35B	2	R	S	4	I	0.5	I	1	I	S	1	I	S	>2	R	0.06	S	0.06	S	<=1	S	<=2	S	NEG	0.5	S	<=0.25	S	<=0.25	S	<=2	S	<=2	S
2245STDY5982510	2008237702	GPS_US_2008237702	14673_1#81	ACTIVE_BACTERIAL_CORE_SURVEILLANCE	UNITED STATES	GEORGIA	CDC	2008	BACTEREMIA	BLOOD	ERR742406	ERS558100	320	1	19A	4	R	I	8	R	1	R	2	R	I	2	R	I	>2	R	>32	R	>2	R	<=1	S	<=2	S	POS	>=4	R	>8	R	>=1	R	<=2	S	<=2	S
2245STDY5982441	2009201416	GPS_US_2009201416	14673_1#12	ACTIVE_BACTERIAL_CORE_SURVEILLANCE	UNITED STATES	COLORADO	CDC	2008	BACTEREMIA	BLOOD	ERR742345	ERS558031	433	19	22F	<=0.03	S	S	<=0.03	S	<=0.06	S	<=0.06	S	S	<=0.5	S	S	<=0.5	S	0.06	S	0.06	S	<=1	S	<=2	S	NEG	0.5	S	<=0.25	S	<=0.25	S	<=2	S	<=2	S
2245STDY5982507	2009203640	GPS_US_2009203640	14673_1#78	ACTIVE_BACTERIAL_CORE_SURVEILLANCE	UNITED STATES	MINNESOTA	CDC	2008	BACTEREMIA	BLOOD	ERR742403	ERS558097	191	15	7F	<=0.03	S	S	<=0.03	S	<=0.06	S	<=0.06	S	S	<=0.5	S	S	<=0.5	S	0.06	S	0.06	S	<=1	S	<=2	S	NEG	0.5	S	<=0.25	S	<=0.25	S	<=2	S	<=2	S
2245STDY5982744	2009207274	GPS_US_2009207274_R1	14673_4#25	ACTIVE_BACTERIAL_CORE_SURVEILLANCE	UNITED STATES	GEORGIA	CDC	2009	BACTEREMIA	BLOOD	ERR742621	ERS558329	3280	132	15B/15C	0.25	R	S	0.5	S	0.12	S	0.12	S	S	<=0.5	S	S	<=0.5	S	8	R	0.06	S	<=1	S	<=2	S	NEG	2	I	>8	R	>=1	R	<=2	S	<=2	S
2245STDY5982748	2009208544	GPS_US_2009208544_R1	14673_4#29	ACTIVE_BACTERIAL_CORE_SURVEILLANCE	UNITED STATES	GEORGIA	CDC	2009	BACTEREMIA	BLOOD	ERR742625	ERS558333	1373	5	23B	0.25	R	S	0.06	S	<=0.06	S	0.12	S	S	<=0.5	S	S	<=0.5	S	0.06	S	0.06	S	<=1	S	<=2	S	NEG	2	I	<=0.25	S	<=0.25	S	<=2	S	<=2	S
2245STDY5982754	2009209974	GPS_US_2009209974_R1	14673_4#35	ACTIVE_BACTERIAL_CORE_SURVEILLANCE	UNITED STATES	NEW YORK	CDC	2009	BACTEREMIA	BLOOD	ERR742631	ERS558339	2705	3	33F	<=0.03	S	S	<=0.03	S	<=0.06	S	<=0.06	S	S	<=0.5	S	S	<=0.5	S	8	R	0.06	S	<=1	S	<=2	S	NEG	2	I	<=0.25	S	<=0.25	S	<=2	S	<=2	S
2245STDY6179447	2009210224	GPS_US_2009210224_R1	19084_8#134	ACTIVE_BACTERIAL_CORE_SURVEILLANCE	UNITED STATES	GEORGIA	CDC	2009	BACTEREMIA	BLOOD	ERR1422647	ERS1021620	2705	3	33F	<=0.03	S	S	<=0.03	S	<=0.06	S	<=0.06	S	S	<=0.5	S	S	<=0.5	S	8	R	0.06	S	<=1	S	<=2	S	NEG	2	I	<=0.25	S	<=0.25	S	<=2	S	<=2	S
2245STDY5982749	2009210923	GPS_US_2009210923_R1	14673_4#30	ACTIVE_BACTERIAL_CORE_SURVEILLANCE	UNITED STATES	MINNESOTA	CDC	2009	BACTEREMIA	BLOOD	ERR742626	ERS558334	320	1	19A	4	R	I	8	R	1	R	2	R	I	2	R	I	>2	R	>32	R	>2	R	<=1	S	<=2	S	POS	>=4	R	>8	R	>=1	R	<=2	S	<=2	S
2245STDY6179448	2009211097	GPS_US_2009211097_R1	19084_8#135	ACTIVE_BACTERIAL_CORE_SURVEILLANCE	UNITED STATES	CONNECTICUT	CDC	2009	BACTEREMIA	BLOOD	ERR1422648	ERS1021621	320	1	19A	8	R	R	8	R	1	R	8	R	R	4	R	R	>2	R	>32	R	>2	R	<=1	S	<=2	S	POS	>=4	R	>8	R	>=1	R	<=2	S	<=2	S
2245STDY5982755	2009211127	GPS_US_2009211127_R1	14673_4#36	ACTIVE_BACTERIAL_CORE_SURVEILLANCE	UNITED STATES	NEW YORK	CDC	2009	BACTEREMIA	BLOOD	ERR742632	ERS558340	2777	5	6C	0.25	R	S	0.06	S	<=0.06	S	0.12	S	S	<=0.5	S	S	<=0.5	S	0.06	S	0.06	S	<=1	S	<=2	S	NEG	0.5	S	<=0.25	S	<=0.25	S	<=2	S	<=2	S
2245STDY6106462	2009211254	GPS_US_2009211254_R1	17966_5#114	ACTIVE_BACTERIAL_CORE_SURVEILLANCE	UNITED STATES	TENNESSEE	CDC	2009	BACTEREMIA	BLOOD	ERR1202564	ERS740124	199	4	19A	0.12	R	S	0.12	S	<=0.06	S	<=0.06	S	S	<=0.5	S	S	<=0.5	S	8	R	0.06	S	<=1	S	<=2	S	NEG	>=4	R	<=0.25	S	<=0.25	S	<=2	S	<=2	S
2245STDY5982750	2009212612	GPS_US_2009212612_R1	14673_4#31	ACTIVE_BACTERIAL_CORE_SURVEILLANCE	UNITED STATES	GEORGIA	CDC	2009	BACTEREMIA	BLOOD	ERR742627	ERS558335	346	48	15B/15C	0.5	R	S	0.25	S	0.12	S	0.25	S	S	<=0.5	S	S	<=0.5	S	0.06	S	0.06	S	<=1	S	<=2	S	NEG	0.5	S	<=0.25	S	<=0.25	S	<=2	S	<=2	S
2245STDY6106463	2009212795	GPS_US_2009212795_R1	17966_5#115	ACTIVE_BACTERIAL_CORE_SURVEILLANCE	UNITED STATES	NEW YORK	CDC	2009	BACTEREMIA	BLOOD	ERR1202565	ERS740125	585	35	10A	<=0.03	S	S	<=0.03	S	<=0.06	S	<=0.06	S	S	<=0.5	S	S	<=0.5	S	0.06	S	0.06	S	<=1	S	<=2	S	NEG	0.5	S	<=0.25	S	<=0.25	S	<=2	S	<=2	S
2245STDY5982757	2009212807	GPS_US_2009212807_R1	14673_4#38	ACTIVE_BACTERIAL_CORE_SURVEILLANCE	UNITED STATES	NEW YORK	CDC	2009	BACTEREMIA	BLOOD	ERR742634	ERS558342	62	3	11A	<=0.03	S	S	<=0.03	S	<=0.06	S	<=0.06	S	S	<=0.5	S	S	<=0.5	S	0.06	S	0.06	S	<=1	S	<=2	S	NEG	2	I	<=0.25	S	<=0.25	S	<=2	S	<=2	S
2245STDY5982759	2009212860	GPS_US_2009212860_R1	14673_4#40	ACTIVE_BACTERIAL_CORE_SURVEILLANCE	UNITED STATES	CALIFORNIA	CDC	2009	BACTEREMIA	BLOOD	ERR742636	ERS558344	63	9	23B	0.25	R	S	<=0.03	S	<=0.06	S	0.12	S	S	<=0.5	S	S	<=0.5	S	>32	R	>2	R	<=1	S	<=2	S	POS	0.5	S	>8	R	>=1	R	<=2	S	<=2	S
2245STDY5982663	2009212930	GPS_US_2009212930	14673_3#42	ACTIVE_BACTERIAL_CORE_SURVEILLANCE	UNITED STATES	MINNESOTA	CDC	2003	BACTEREMIA	BLOOD	ERR742544	ERS558251	220	32	12F	<=0.03	S	S	<=0.03	S	<=0.06	S	<=0.06	S	S	<=0.5	S	S	<=0.5	S	0.06	S	0.06	S	<=1	S	<=2	S	NEG	0.5	S	<=0.25	S	<=0.25	S	<=2	S	<=2	S
2245STDY5982760	2009213994	GPS_US_2009213994_R1	14673_4#41	ACTIVE_BACTERIAL_CORE_SURVEILLANCE	UNITED STATES	MARYLAND	CDC	2009	BACTEREMIA	BLOOD	ERR742637	ERS558345	100	3	33F	<=0.03	S	S	<=0.03	S	<=0.06	S	<=0.06	S	S	<=0.5	S	S	<=0.5	S	8	R	0.06	S	<=1	S	<=2	S	NEG	2	I	<=0.25	S	<=0.25	S	<=2	S	<=2	S
2245STDY5982751	2009214140	GPS_US_2009214140_R1	14673_4#32	ACTIVE_BACTERIAL_CORE_SURVEILLANCE	UNITED STATES	MINNESOTA	CDC	2009	BACTEREMIA	BLOOD	ERR742628	ERS558336	320	1	19A	4	R	I	8	R	1	R	2	R	I	2	R	I	>2	R	>32	R	>2	R	<=1	S	<=2	S	POS	>=4	R	>8	R	>=1	R	<=2	S	<=2	S
2245STDY6179445	2009214597	GPS_US_2009214597_R1	19084_8#132	ACTIVE_BACTERIAL_CORE_SURVEILLANCE	UNITED STATES	MINNESOTA	CDC	2002	BACTEREMIA	BLOOD	ERR1422645	ERS1021618	473	13	6A	0.06	S	S	0.06	S	<=0.06	S	<=0.06	S	S	<=0.5	S	S	<=0.5	S	>32	R	1	R	<=1	S	<=2	S	POS	0.5	S	<=0.25	S	<=0.25	S	<=2	S	<=2	S
2245STDY5982761	2009215898	GPS_US_2009215898_R1	14673_4#42	ACTIVE_BACTERIAL_CORE_SURVEILLANCE	UNITED STATES	NEW YORK	CDC	2009	BACTEREMIA	BLOOD	ERR742638	ERS558346	695	27	19A	0.12	R	S	0.06	S	<=0.06	S	<=0.06	S	S	<=0.5	S	S	<=0.5	S	0.06	S	0.06	S	<=1	S	<=2	S	NEG	0.5	S	<=0.25	S	<=0.25	S	<=2	S	<=2	S
2245STDY5982583	2009216540	GPS_US_2009216540	14673_2#58	ACTIVE_BACTERIAL_CORE_SURVEILLANCE	UNITED STATES	MINNESOTA	CDC	2001	BACTEREMIA	BLOOD	ERR742472	ERS558172	439	7	23F	<=0.03	S	S	<=0.03	S	<=0.06	S	<=0.06	S	S	<=0.5	S	S	<=0.5	S	0.06	S	0.06	S	<=1	S	<=2	S	NEG	2	I	<=0.25	S	<=0.25	S	<=2	S	<=2	S
2245STDY5982445	2009216552	GPS_US_2009216552	14673_1#16	ACTIVE_BACTERIAL_CORE_SURVEILLANCE	UNITED STATES	MINNESOTA	CDC	2001	BACTEREMIA	BLOOD	ERR742349	ERS558035	3060	50	18C	<=0.03	S	S	<=0.03	S	<=0.06	S	<=0.06	S	S	<=0.5	S	S	<=0.5	S	0.06	S	0.06	S	<=1	S	<=2	S	NEG	0.5	S	<=0.25	S	<=0.25	S	<=2	S	<=2	S
2245STDY5982443	2009216595	GPS_US_2009216595	14673_1#14	ACTIVE_BACTERIAL_CORE_SURVEILLANCE	UNITED STATES	MINNESOTA	CDC	2001	BACTEREMIA	BLOOD	ERR742347	ERS558033	433	19	22F	<=0.03	S	S	<=0.03	S	<=0.06	S	<=0.06	S	S	<=0.5	S	S	<=0.5	S	0.06	S	0.06	S	<=1	S	<=2	S	NEG	0.5	S	<=0.25	S	<=0.25	S	<=2	S	<=2	S
2245STDY5982763	2009218157	GPS_US_2009218157_R1	14673_4#44	ACTIVE_BACTERIAL_CORE_SURVEILLANCE	UNITED STATES	GEORGIA	CDC	2009	BACTEREMIA	BLOOD	ERR742640	ERS558348	138	24	6C	<=0.03	S	S	<=0.03	S	<=0.06	S	<=0.06	S	S	<=0.5	S	S	<=0.5	S	0.06	S	0.06	S	<=1	S	<=2	S	NEG	2	I	<=0.25	S	<=0.25	S	<=2	S	<=2	S
2245STDY5982764	2009218419	GPS_US_2009218419_R1	14673_4#45	ACTIVE_BACTERIAL_CORE_SURVEILLANCE	UNITED STATES	GEORGIA	CDC	2009	BACTEREMIA	BLOOD	ERR742641	ERS558349	12735	3	11A	<=0.03	S	S	<=0.03	S	<=0.06	S	<=0.06	S	S	<=0.5	S	S	<=0.5	S	8	R	0.06	S	<=1	S	<=2	S	NEG	0.5	S	<=0.25	S	<=0.25	S	<=2	S	<=2	S
2245STDY5982738	2010200686	GPS_US_2010200686_R1	14673_4#19	ACTIVE_BACTERIAL_CORE_SURVEILLANCE	UNITED STATES	MINNESOTA	CDC	2009	BACTEREMIA	BLOOD	ERR742615	ERS558323	320	1	19A	4	R	I	8	R	1	R	2	R	I	2	R	I	>2	R	>32	R	>2	R	<=1	S	<=2	S	POS	>=4	R	>8	R	>=1	R	<=2	S	<=2	S
2245STDY5982740	2010205399	GPS_US_2010205399_R1	14673_4#21	ACTIVE_BACTERIAL_CORE_SURVEILLANCE	UNITED STATES	TENNESSEE	CDC	2009	BACTEREMIA	BLOOD	ERR742617	ERS558325	667	4	19A	<=0.03	S	S	<=0.03	S	<=0.06	S	<=0.06	S	S	<=0.5	S	S	<=0.5	S	0.06	S	0.06	S	<=1	S	<=2	S	NEG	0.5	S	<=0.25	S	<=0.25	S	<=2	S	<=2	S
2245STDY6179446	2010216336	GPS_US_2010216336_R1	19084_8#133	ACTIVE_BACTERIAL_CORE_SURVEILLANCE	UNITED STATES	CALIFORNIA	CDC	2009	BACTEREMIA	BLOOD	ERR1422646	ERS1021619	230	10	19A	0.5	R	S	0.12	S	0.12	S	0.12	S	S	<=0.5	S	S	<=0.5	S	0.06	S	0.06	S	<=1	S	<=2	S	NEG	>=4	R	>8	R	>=1	R	<=2	S	<=2	S
2245STDY5982742	2010223248	GPS_US_2010223248_R1	14673_4#23	ACTIVE_BACTERIAL_CORE_SURVEILLANCE	UNITED STATES	TENNESSEE	CDC	2009	BACTEREMIA	BLOOD	ERR742619	ERS558327	558	59	35B	2	R	S	4	I	0.5	I	1	I	S	1	I	S	>2	R	8	R	0.06	S	<=1	S	<=2	S	NEG	0.5	S	<=0.25	S	<=0.25	S	<=2	S	<=2	S
2245STDY5982469	2011200206	GPS_US_2011200206	14673_1#40	ACTIVE_BACTERIAL_CORE_SURVEILLANCE	UNITED STATES	MINNESOTA	CDC	2000	BACTEREMIA	BLOOD	ERR742367	ERS558059	191	15	7F	<=0.03	S	S	<=0.03	S	<=0.06	S	<=0.06	S	S	<=0.5	S	S	<=0.5	S	0.06	S	0.06	S	<=1	S	<=2	S	NEG	0.5	S	<=0.25	S	<=0.25	S	<=2	S	<=2	S
2245STDY5982430	2012224892	GPS_US_2012224892	14673_1#1	ACTIVE_BACTERIAL_CORE_SURVEILLANCE	UNITED STATES	MINNESOTA	CDC	2012	BACTEREMIA	BLOOD	ERR742334	ERS558020	162	6	15B/15C	<=0.03	S	S	<=0.03	S	<=0.06	S	<=0.06	S	S	<=0.5	S	S	<=0.5	S	0.06	S	0.06	S	<=1	S	<=2	S	NEG	0.5	S	<=0.25	S	<=0.25	S	<=2	S	<=2	S
2245STDY5982434	2012224898	GPS_US_2012224898	14673_1#5	ACTIVE_BACTERIAL_CORE_SURVEILLANCE	UNITED STATES	MINNESOTA	CDC	2012	BACTEREMIA	BLOOD	ERR742338	ERS558024	639	24	6C	<=0.03	S	S	<=0.03	S	<=0.06	S	<=0.06	S	S	<=0.5	S	S	<=0.5	S	8	R	0.06	S	<=1	S	<=2	S	NEG	0.5	S	<=0.25	S	<=0.25	S	<=2	S	<=2	S
2245STDY5982433	2013210866	GPS_US_2013210866	14673_1#4	ACTIVE_BACTERIAL_CORE_SURVEILLANCE	UNITED STATES	GEORGIA	CDC	2012	BACTEREMIA	BLOOD	ERR742337	ERS558023	2705	3	33F	<=0.03	S	S	<=0.03	S	<=0.06	S	<=0.06	S	S	<=0.5	S	S	<=0.5	S	8	R	0.06	S	<=1	S	<=2	S	NEG	2	I	<=0.25	S	<=0.25	S	<=2	S	<=2	S
2245STDY5982437	2013212843	GPS_US_2013212843	14673_1#8	ACTIVE_BACTERIAL_CORE_SURVEILLANCE	UNITED STATES	MINNESOTA	CDC	2012	BACTEREMIA	BLOOD	ERR742341	ERS558027	180	12	3	<=0.03	S	S	<=0.03	S	<=0.06	S	<=0.06	S	S	<=0.5	S	S	<=0.5	S	0.06	S	0.06	S	<=1	S	<=2	S	NEG	0.5	S	<=0.25	S	<=0.25	S	<=2	S	<=2	S
2245STDY5982531	2141_00	GPS_US_2141_00	14673_2#6	ACTIVE_BACTERIAL_CORE_SURVEILLANCE	UNITED STATES	GEORGIA	CDC	2000	BACTEREMIA	BLOOD	ERR742426	ERS558120	113	50	18C	<=0.03	S	S	<=0.03	S	<=0.06	S	<=0.06	S	S	<=0.5	S	S	<=0.5	S	0.06	S	0.06	S	<=1	S	<=2	S	NEG	0.5	S	<=0.25	S	<=0.25	S	<=2	S	<=2	S
2245STDY6020193	2203_00	GPS_US_2203_00_R1	15608_2#36	ACTIVE_BACTERIAL_CORE_SURVEILLANCE	UNITED STATES	TENNESSEE	CDC	1999	BACTEREMIA	BLOOD	ERR876466	ERS628629	81	16	23F	2	R	S	2	S	0.5	I	1	I	S	1	I	S	>2	R	8	R	0.06	S	<=1	S	<=2	S	NEG	>=4	R	>8	R	>=1	R	<=2	S	>=8	R
2245STDY6020194	2204_00	GPS_US_2204_00_R1	15608_2#37	ACTIVE_BACTERIAL_CORE_SURVEILLANCE	UNITED STATES	TENNESSEE	CDC	1999	BACTEREMIA	BLOOD	ERR876467	ERS628630	100	3	33F	<=0.03	S	S	<=0.03	S	<=0.06	S	<=0.06	S	S	<=0.5	S	S	<=0.5	S	0.06	S	0.06	S	<=1	S	<=2	S	NEG	2	I	<=0.25	S	<=0.25	S	<=2	S	<=2	S
2245STDY6329047	2291_98	GPS_US_2291_98	21053_8#25	ACTIVE_BACTERIAL_CORE_SURVEILLANCE	UNITED STATES	GEORGIA	CDC	1998	BACTEREMIA	BLOOD	ERR1788037	ERS1299602	989	26	12F	<=0.03	S	S	<=0.03	S	<=0.06	S	<=0.06	S	S	<=0.5	S	S	<=0.5	S	0.06	S	0.06	S	<=1	S	<=2	S	NEG	2	I	>8	R	>=1	R	<=2	S	>=8	R
2245STDY5982520	2305_01	GPS_US_2305_01	14673_1#91	ACTIVE_BACTERIAL_CORE_SURVEILLANCE	UNITED STATES	GEORGIA	CDC	2001	BACTEREMIA	BLOOD	ERR742416	ERS558110	205	27	4	<=0.03	S	S	<=0.03	S	<=0.06	S	<=0.06	S	S	<=0.5	S	S	<=0.5	S	>32	R	>2	R	<=1	S	<=2	S	POS	0.5	S	<=0.25	S	<=0.25	S	<=2	S	<=2	S
2245STDY6020172	2750_99	GPS_US_2750_99_R1	15608_2#15	ACTIVE_BACTERIAL_CORE_SURVEILLANCE	UNITED STATES	CONNECTICUT	CDC	1998	BACTEREMIA	BLOOD	ERR876445	ERS628608	498	36	35F	<=0.03	S	S	<=0.03	S	<=0.06	S	<=0.06	S	S	<=0.5	S	S	<=0.5	S	0.06	S	0.06	S	<=1	S	<=2	S	NEG	0.5	S	<=0.25	S	<=0.25	S	<=2	S	<=2	S
2245STDY6020173	2799_99	GPS_US_2799_99_R1	15608_2#16	ACTIVE_BACTERIAL_CORE_SURVEILLANCE	UNITED STATES	CONNECTICUT	CDC	1998	BACTEREMIA	BLOOD	ERR876446	ERS628609	9	18	14	<=0.03	S	S	<=0.03	S	<=0.06	S	<=0.06	S	S	<=0.5	S	S	<=0.5	S	8	R	0.06	S	<=1	S	<=2	S	NEG	0.5	S	<=0.25	S	<=0.25	S	<=2	S	<=2	S
2245STDY5982458	2838_00	GPS_US_2838_00	15277_1#7	ACTIVE_BACTERIAL_CORE_SURVEILLANCE	UNITED STATES	CALIFORNIA	CDC	2000	BACTEREMIA	BLOOD	ERR845740	ERS558048	36	7	23F	<=0.03	S	S	<=0.03	S	<=0.06	S	<=0.06	S	S	<=0.5	S	S	<=0.5	S	0.06	S	0.06	S	<=1	S	<=2	S	NEG	0.5	S	<=0.25	S	<=0.25	S	<=2	S	<=2	S
2245STDY5982523	2874_01	GPS_US_2874_01	14673_1#94	ACTIVE_BACTERIAL_CORE_SURVEILLANCE	UNITED STATES	GEORGIA	CDC	2001	BACTEREMIA	BLOOD	ERR742419	ERS558113	1857	6	9V	<=0.03	S	S	<=0.03	S	<=0.06	S	<=0.06	S	S	<=0.5	S	S	<=0.5	S	0.06	S	0.06	S	<=1	S	<=2	S	NEG	0.5	S	<=0.25	S	<=0.25	S	<=2	S	<=2	S
2245STDY6020266	3038_99	GPS_US_3038_99_R1	15608_3#13	ACTIVE_BACTERIAL_CORE_SURVEILLANCE	UNITED STATES	NEW YORK	CDC	1998	BACTEREMIA	BLOOD	ERR876538	ERS628712	570	46	16F	<=0.03	S	S	<=0.03	S	<=0.06	S	<=0.06	S	S	<=0.5	S	S	<=0.5	S	0.06	S	0.06	S	<=1	S	<=2	S	NEG	0.5	S	<=0.25	S	<=0.25	S	<=2	S	<=2	S
2245STDY6020207	3063_00	GPS_US_3063_00_R1	15608_2#50	ACTIVE_BACTERIAL_CORE_SURVEILLANCE	UNITED STATES	TENNESSEE	CDC	1999	BACTEREMIA	BLOOD	ERR876480	ERS628643	652	1	19F	4	R	I	8	R	1	R	1	I	S	1	I	S	>2	R	8	R	0.06	S	<=1	S	<=2	S	NEG	>=4	R	<=0.25	S	<=0.25	S	<=2	S	<=2	S
2245STDY5982539	3101_04	GPS_US_3101_04	15277_1#12	ACTIVE_BACTERIAL_CORE_SURVEILLANCE	UNITED STATES	TENNESSEE	CDC	2003	BACTEREMIA	BLOOD	ERR845745	ERS558128	12741	35	10A	<=0.03	S	S	<=0.03	S	<=0.06	S	<=0.06	S	S	<=0.5	S	S	<=0.5	S	0.06	S	0.06	S	<=1	S	<=2	S	NEG	0.5	S	<=0.25	S	<=0.25	S	<=2	S	<=2	S
2245STDY5982524	3124_00	GPS_US_3124_00	14673_1#95	ACTIVE_BACTERIAL_CORE_SURVEILLANCE	UNITED STATES	GEORGIA	CDC	2000	BACTEREMIA	BLOOD	ERR742420	ERS558114	218	32	12F	<=0.03	S	S	<=0.03	S	<=0.06	S	<=0.06	S	S	<=0.5	S	S	<=0.5	S	0.06	S	0.06	S	<=1	S	<=2	S	NEG	0.5	S	<=0.25	S	<=0.25	S	<=2	S	<=2	S
2245STDY6020251	3163_99	GPS_US_3163_99_R1	15608_2#94	ACTIVE_BACTERIAL_CORE_SURVEILLANCE	UNITED STATES	GEORGIA	CDC	1999	BACTEREMIA	BLOOD	ERR876524	ERS628714	81	16	23F	2	R	S	2	S	0.5	I	1	I	S	1	I	S	>2	R	>32	R	>2	R	<=1	S	<=2	S	POS	>=4	R	>8	R	>=1	R	<=2	S	>=8	R
2245STDY5982660	3390_06	GPS_US_3390_06	14673_3#39	ACTIVE_BACTERIAL_CORE_SURVEILLANCE	UNITED STATES	TENNESSEE	CDC	2005	BACTEREMIA	BLOOD	ERR742541	ERS558248	100	3	33F	<=0.03	S	S	<=0.03	S	<=0.06	S	<=0.06	S	S	<=0.5	S	S	<=0.5	S	8	R	0.06	S	<=1	S	<=2	S	NEG	2	I	<=0.25	S	<=0.25	S	<=2	S	<=2	S
2245STDY6020184	3438_99	GPS_US_3438_99_R1	15608_2#27	ACTIVE_BACTERIAL_CORE_SURVEILLANCE	UNITED STATES	GEORGIA	CDC	1999	BACTEREMIA	BLOOD	ERR876457	ERS628620	656	39	14	<=0.03	S	S	<=0.03	S	<=0.06	S	<=0.06	S	S	<=0.5	S	S	<=0.5	S	0.06	S	0.06	S	<=1	S	<=2	S	NEG	0.5	S	<=0.25	S	<=0.25	S	<=2	S	<=2	S
2245STDY5982526	3464_00	GPS_US_3464_00	14673_2#1	ACTIVE_BACTERIAL_CORE_SURVEILLANCE	UNITED STATES	GEORGIA	CDC	2000	BACTEREMIA	BLOOD	ERR742421	ERS558115	13	18	14	4	R	I	8	R	1	R	1	I	S	2	R	I	>2	R	8	R	0.06	S	<=1	S	<=2	S	NEG	>=4	R	<=0.25	S	<=0.25	S	<=2	S	<=2	S
2245STDY6020183	3585_99	GPS_US_3585_99_R1	15608_2#26	ACTIVE_BACTERIAL_CORE_SURVEILLANCE	UNITED STATES	CONNECTICUT	CDC	1998	BACTEREMIA	BLOOD	ERR876456	ERS628619	113	50	18C	<=0.03	S	S	<=0.03	S	<=0.06	S	<=0.06	S	S	<=0.5	S	S	<=0.5	S	0.06	S	0.06	S	<=1	S	<=2	S	NEG	>=4	R	<=0.25	S	<=0.25	S	<=2	S	<=2	S
2245STDY6020190	3627_98	GPS_US_3627_98_R1	15608_2#33	ACTIVE_BACTERIAL_CORE_SURVEILLANCE	UNITED STATES	GEORGIA	CDC	1998	BACTEREMIA	BLOOD	ERR876463	ERS628626	124	39	14	<=0.03	S	S	<=0.03	S	<=0.06	S	<=0.06	S	S	<=0.5	S	S	<=0.5	S	0.06	S	0.06	S	<=1	S	<=2	S	NEG	0.5	S	<=0.25	S	<=0.25	S	<=2	S	<=2	S
2245STDY6020187	3628_99	GPS_US_3628_99_R1	15608_2#30	ACTIVE_BACTERIAL_CORE_SURVEILLANCE	UNITED STATES	CONNECTICUT	CDC	1998	BACTEREMIA	BLOOD	ERR876460	ERS628623	124	39	14	<=0.03	S	S	<=0.03	S	<=0.06	S	<=0.06	S	S	<=0.5	S	S	<=0.5	S	0.06	S	0.06	S	<=1	S	<=2	S	NEG	0.5	S	<=0.25	S	<=0.25	S	<=2	S	<=2	S
2245STDY5982572	3639_06	GPS_US_3639_06	14673_2#47	ACTIVE_BACTERIAL_CORE_SURVEILLANCE	UNITED STATES	MINNESOTA	CDC	2005	BACTEREMIA	BLOOD	ERR742462	ERS558161	547	45	34	<=0.03	S	S	<=0.03	S	<=0.06	S	<=0.06	S	S	<=0.5	S	S	<=0.5	S	0.06	S	0.06	S	<=1	S	<=2	S	NEG	0.5	S	<=0.25	S	<=0.25	S	<=2	S	<=2	S
2245STDY5982640	3652_03	GPS_US_3652_03	14673_3#19	ACTIVE_BACTERIAL_CORE_SURVEILLANCE	UNITED STATES	CONNECTICUT	CDC	2002	BACTEREMIA	BLOOD	ERR742522	ERS558228	695	27	4	<=0.03	S	S	<=0.03	S	<=0.06	S	<=0.06	S	S	<=0.5	S	S	<=0.5	S	0.06	S	0.06	S	<=1	S	<=2	S	NEG	0.5	S	<=0.25	S	<=0.25	S	<=2	S	<=2	S
2245STDY5982632	3658_02	GPS_US_3658_02	14673_3#11	ACTIVE_BACTERIAL_CORE_SURVEILLANCE	UNITED STATES	NEW YORK	CDC	2001	BACTEREMIA	BLOOD	ERR742514	ERS558220	695	27	19A	0.12	R	S	0.06	S	<=0.06	S	<=0.06	S	S	<=0.5	S	S	<=0.5	S	0.06	S	0.06	S	<=1	S	<=2	S	NEG	0.5	S	<=0.25	S	<=0.25	S	<=2	S	<=2	S
2245STDY5982464	3673_03	GPS_US_3673_03	15277_1#9	ACTIVE_BACTERIAL_CORE_SURVEILLANCE	UNITED STATES	CONNECTICUT	CDC	2002	BACTEREMIA	BLOOD	ERR845742	ERS558054	100	3	33F	<=0.03	S	S	<=0.03	S	<=0.06	S	<=0.06	S	S	<=0.5	S	S	<=0.5	S	0.06	S	0.06	S	<=1	S	<=2	S	NEG	0.5	S	<=0.25	S	<=0.25	S	<=2	S	<=2	S
2245STDY5982567	3904_01	GPS_US_3904_01	14673_2#42	ACTIVE_BACTERIAL_CORE_SURVEILLANCE	UNITED STATES	CONNECTICUT	CDC	2000	BACTEREMIA	BLOOD	ERR742458	ERS558156	460	64	6A	0.06	S	S	<=0.03	S	<=0.06	S	<=0.06	S	S	<=0.5	S	S	<=0.5	S	0.06	S	0.06	S	<=1	S	<=2	S	NEG	>=4	R	<=0.25	S	<=0.25	S	<=2	S	<=2	S
2245STDY6020174	3912_99	GPS_US_3912_99_R1	15608_2#17	ACTIVE_BACTERIAL_CORE_SURVEILLANCE	UNITED STATES	GEORGIA	CDC	1999	BACTEREMIA	BLOOD	ERR876447	ERS628610	13	18	14	<=0.03	S	S	<=0.03	S	<=0.06	S	0.12	S	S	<=0.5	S	S	<=0.5	S	8	R	0.06	S	<=1	S	<=2	S	NEG	>=4	R	<=0.25	S	<=0.25	S	<=2	S	<=2	S
2245STDY5982450	3978_02	GPS_US_3978_02	14673_1#21	ACTIVE_BACTERIAL_CORE_SURVEILLANCE	UNITED STATES	GEORGIA	CDC	2002	BACTEREMIA	BLOOD	ERR742353	ERS558040	199	4	19A	0.5	R	S	0.5	S	0.12	S	0.25	S	S	<=0.5	S	S	2	R	8	R	0.06	S	<=1	S	<=2	S	NEG	>=4	R	<=0.25	S	<=0.25	S	<=2	S	<=2	S
2245STDY5982481	4011_07	GPS_US_4011_07	14673_1#52	ACTIVE_BACTERIAL_CORE_SURVEILLANCE	UNITED STATES	MINNESOTA	CDC	2006	BACTEREMIA	BLOOD	ERR742377	ERS558071	1451	1	19A	4	R	I	8	R	1	R	2	R	I	2	R	I	>2	R	>32	R	>2	R	<=1	S	<=2	S	POS	>=4	R	>8	R	>=1	R	<=2	S	<=2	S
2245STDY6020249	4053_99	GPS_US_4053_99_R1	15608_2#92	ACTIVE_BACTERIAL_CORE_SURVEILLANCE	UNITED STATES	GEORGIA	CDC	1999	BACTEREMIA	BLOOD	ERR876522	ERS628707	244	27	4	<=0.03	S	S	<=0.03	S	<=0.06	S	<=0.06	S	S	<=0.5	S	S	<=0.5	S	0.06	S	0.06	S	<=1	S	<=2	S	NEG	0.5	S	<=0.25	S	<=0.25	S	<=2	S	<=2	S
2245STDY5982484	4116_07	GPS_US_4116_07	14673_1#55	ACTIVE_BACTERIAL_CORE_SURVEILLANCE	UNITED STATES	NEW YORK	CDC	2006	BACTEREMIA	BLOOD	ERR742380	ERS558074	668	4	19A	0.12	R	S	0.12	S	<=0.06	S	<=0.06	S	S	<=0.5	S	S	<=0.5	S	0.06	S	0.06	S	<=1	S	<=2	S	NEG	0.5	S	<=0.25	S	<=0.25	S	<=2	S	<=2	S
2245STDY5982609	4196_07	GPS_US_4196_07	14673_2#84	ACTIVE_BACTERIAL_CORE_SURVEILLANCE	UNITED STATES	NEW YORK	CDC	2006	BACTEREMIA	BLOOD	ERR742495	ERS558198	12729	4	15B/15C	<=0.03	S	S	<=0.03	S	<=0.06	S	<=0.06	S	S	<=0.5	S	S	<=0.5	S	0.06	S	0.06	S	<=1	S	<=2	S	NEG	0.5	S	<=0.25	S	<=0.25	S	<=2	S	<=2	S
2245STDY5982557	4214_05	GPS_US_4214_05	14673_2#32	ACTIVE_BACTERIAL_CORE_SURVEILLANCE	UNITED STATES	CALIFORNIA	CDC	2004	BACTEREMIA	BLOOD	ERR742449	ERS558146	1794	61	17F	<=0.03	S	S	<=0.03	S	<=0.06	S	<=0.06	S	S	<=0.5	S	S	<=0.5	S	0.06	S	0.06	S	<=1	S	<=2	S	NEG	0.5	S	<=0.25	S	<=0.25	S	<=2	S	<=2	S
2245STDY6020167	4226_99	GPS_US_4226_99_R1	15608_2#10	ACTIVE_BACTERIAL_CORE_SURVEILLANCE	UNITED STATES	GEORGIA	CDC	1999	BACTEREMIA	BLOOD	ERR876440	ERS628603	90	23	6B	2	R	S	1	S	0.5	I	0.5	S	S	1	I	S	>2	R	>32	R	>2	R	<=1	S	<=2	S	POS	>=4	R	>8	R	>=1	R	<=2	S	<=2	S
2245STDY6020205	4258_98	GPS_US_4258_98_R1	15608_2#48	ACTIVE_BACTERIAL_CORE_SURVEILLANCE	UNITED STATES	GEORGIA	CDC	1998	BACTEREMIA	BLOOD	ERR876478	ERS628641	816	36	10A	<=0.03	S	S	<=0.03	S	<=0.06	S	<=0.06	S	S	<=0.5	S	S	<=0.5	S	0.06	S	0.06	S	<=1	S	<=2	S	NEG	0.5	S	<=0.25	S	<=0.25	S	<=2	S	<=2	S
2245STDY5982486	4268_07	GPS_US_4268_07	14673_1#57	ACTIVE_BACTERIAL_CORE_SURVEILLANCE	UNITED STATES	TENNESSEE	CDC	2006	BACTEREMIA	BLOOD	ERR742382	ERS558076	100	3	33F	<=0.03	S	S	<=0.03	S	<=0.06	S	<=0.06	S	S	<=0.5	S	S	<=0.5	S	0.06	S	0.06	S	<=1	S	<=2	S	NEG	2	I	<=0.25	S	<=0.25	S	<=2	S	<=2	S
2245STDY6020189	4338_98	GPS_US_4338_98_R1	15608_2#32	ACTIVE_BACTERIAL_CORE_SURVEILLANCE	UNITED STATES	GEORGIA	CDC	1998	BACTEREMIA	BLOOD	ERR876462	ERS628625	10912	23	6B	<=0.03	S	S	<=0.03	S	<=0.06	S	<=0.06	S	S	<=0.5	S	S	<=0.5	S	0.06	S	0.06	S	<=1	S	<=2	S	NEG	2	I	<=0.25	S	<=0.25	S	<=2	S	<=2	S
2245STDY6020197	4378_03	GPS_US_4378_03_R1	15608_2#40	ACTIVE_BACTERIAL_CORE_SURVEILLANCE	UNITED STATES	MINNESOTA	CDC	1999	BACTEREMIA	BLOOD	ERR876470	ERS628633	13	18	14	4	R	I	8	R	1	R	1	I	S	2	R	I	>2	R	8	R	0.06	S	<=1	S	<=2	S	NEG	>=4	R	<=0.25	S	<=0.25	S	<=2	S	<=2	S
2245STDY6179438	4397_99	GPS_US_4397_99_R1	19084_8#125	ACTIVE_BACTERIAL_CORE_SURVEILLANCE	UNITED STATES	GEORGIA	CDC	1999	BACTEREMIA	BLOOD	ERR1422638	ERS1021611	695	27	4	<=0.03	S	S	<=0.03	S	<=0.06	S	<=0.06	S	S	<=0.5	S	S	<=0.5	S	>32	R	1	R	<=1	S	<=2	S	POS	0.5	S	<=0.25	S	<=0.25	S	<=2	S	<=2	S
2245STDY5982700	4402_07	GPS_US_4402_07	14673_3#79	ACTIVE_BACTERIAL_CORE_SURVEILLANCE	UNITED STATES	NEW YORK	CDC	2006	BACTEREMIA	BLOOD	ERR742580	ERS558288	899	27	4	<=0.03	S	S	<=0.03	S	<=0.06	S	<=0.06	S	S	<=0.5	S	S	<=0.5	S	8	R	0.06	S	<=1	S	<=2	S	NEG	0.5	S	>8	R	>=1	R	<=2	S	<=2	S
2245STDY6020281	4403_99	GPS_US_4403_99_R1	15608_3#28	ACTIVE_BACTERIAL_CORE_SURVEILLANCE	UNITED STATES	GEORGIA	CDC	1999	BACTEREMIA	BLOOD	ERR876553	ERS628729	12757	23	6B	<=0.03	S	S	<=0.03	S	<=0.06	S	<=0.06	S	S	<=0.5	S	S	<=0.5	S	0.06	S	0.06	S	<=1	S	<=2	S	NEG	>=4	R	<=0.25	S	<=0.25	S	<=2	S	<=2	S
2245STDY5982556	4404_05	GPS_US_4404_05	14673_2#31	ACTIVE_BACTERIAL_CORE_SURVEILLANCE	UNITED STATES	MINNESOTA	CDC	2004	BACTEREMIA	BLOOD	ERR742448	ERS558145	393	38	38	<=0.03	S	S	<=0.03	S	<=0.06	S	<=0.06	S	S	<=0.5	S	S	<=0.5	S	0.06	S	0.06	S	<=1	S	<=2	S	NEG	0.5	S	<=0.25	S	<=0.25	S	<=2	S	<=2	S
2245STDY6020223	4437_03	GPS_US_4437_03_R1	15608_2#66	ACTIVE_BACTERIAL_CORE_SURVEILLANCE	UNITED STATES	MINNESOTA	CDC	1999	BACTEREMIA	BLOOD	ERR876496	ERS628659	3060	50	18C	<=0.03	S	S	<=0.03	S	<=0.06	S	<=0.06	S	S	<=0.5	S	S	<=0.5	S	0.06	S	0.06	S	<=1	S	<=2	S	NEG	0.5	S	<=0.25	S	<=0.25	S	<=2	S	<=2	S
2245STDY6020224	4445_03	GPS_US_4445_03_R1	15608_2#67	ACTIVE_BACTERIAL_CORE_SURVEILLANCE	UNITED STATES	MINNESOTA	CDC	1999	BACTEREMIA	BLOOD	ERR876497	ERS628660	124	39	14	<=0.03	S	S	<=0.03	S	<=0.06	S	<=0.06	S	S	<=0.5	S	S	<=0.5	S	0.06	S	0.06	S	<=1	S	<=2	S	NEG	0.5	S	<=0.25	S	<=0.25	S	<=2	S	<=2	S
2245STDY5982605	4534_04	GPS_US_4534_04	14673_2#80	ACTIVE_BACTERIAL_CORE_SURVEILLANCE	UNITED STATES	NEW YORK	CDC	2003	BACTEREMIA	BLOOD	ERR742491	ERS558194	10830	64	6A	<=0.03	S	S	<=0.03	S	<=0.06	S	<=0.06	S	S	<=0.5	S	S	<=0.5	S	0.06	S	0.06	S	<=1	S	<=2	S	NEG	0.5	S	<=0.25	S	<=0.25	S	<=2	S	<=2	S
2245STDY5982553	4547_05	GPS_US_4547_05	14673_2#28	ACTIVE_BACTERIAL_CORE_SURVEILLANCE	UNITED STATES	MINNESOTA	CDC	2004	BACTEREMIA	BLOOD	ERR742446	ERS558142	638	50	18C	<=0.03	S	S	<=0.03	S	<=0.06	S	<=0.06	S	S	<=0.5	S	S	<=0.5	S	0.06	S	0.06	S	<=1	S	<=2	S	NEG	0.5	S	<=0.25	S	<=0.25	S	<=2	S	<=2	S
2245STDY6179464	4569_99	GPS_US_4569_99_R2	19084_8#151	ACTIVE_BACTERIAL_CORE_SURVEILLANCE	UNITED STATES	OREGON	CDC	1998	BACTEREMIA	BLOOD	ERR1422664	ERS1021637	4598	24	6B	<=0.03	S	S	<=0.03	S	<=0.06	S	<=0.06	S	S	<=0.5	S	S	<=0.5	S	0.06	S	0.06	S	<=1	S	<=2	S	NEG	2	I	<=0.25	S	<=0.25	S	<=2	S	<=2	S
2245STDY6329049	4584_05	GPS_US_4584_05	21053_8#27	ACTIVE_BACTERIAL_CORE_SURVEILLANCE	UNITED STATES	MINNESOTA	CDC	2004	BACTEREMIA	BLOOD	ERR1788039	ERS1299753	989	26	12F	<=0.03	S	S	<=0.03	S	<=0.06	S	<=0.06	S	S	<=0.5	S	S	<=0.5	S	0.06	S	0.06	S	<=1	S	<=2	S	NEG	2	I	>8	R	>=1	R	<=2	S	>=8	R
2245STDY6020175	4604_99	GPS_US_4604_99_R1	15608_2#18	ACTIVE_BACTERIAL_CORE_SURVEILLANCE	UNITED STATES	OREGON	CDC	1998	BACTEREMIA	BLOOD	ERR876448	ERS628611	12753	39	14	<=0.03	S	S	<=0.03	S	<=0.06	S	<=0.06	S	S	<=0.5	S	S	<=0.5	S	0.06	S	0.06	S	<=1	S	<=2	S	NEG	0.5	S	<=0.25	S	<=0.25	S	<=2	S	<=2	S
2245STDY5982635	4654_04	GPS_US_4654_04	14673_3#14	ACTIVE_BACTERIAL_CORE_SURVEILLANCE	UNITED STATES	MINNESOTA	CDC	2002	BACTEREMIA	BLOOD	ERR742517	ERS558223	3060	50	18C	<=0.03	S	S	<=0.03	S	<=0.06	S	<=0.06	S	S	<=0.5	S	S	<=0.5	S	0.06	S	0.06	S	<=1	S	<=2	S	NEG	0.5	S	<=0.25	S	<=0.25	S	<=2	S	<=2	S
2245STDY6020270	4656_00	GPS_US_4656_00_R1	15608_3#17	ACTIVE_BACTERIAL_CORE_SURVEILLANCE	UNITED STATES	MARYLAND	CDC	1999	BACTEREMIA	BLOOD	ERR876542	ERS628717	3616	119	19F	<=0.03	S	S	<=0.03	S	<=0.06	S	<=0.06	S	S	<=0.5	S	S	<=0.5	S	0.06	S	0.06	S	<=1	S	<=2	S	NEG	0.5	S	<=0.25	S	<=0.25	S	<=2	S	<=2	S
2245STDY5982558	4736_05	GPS_US_4736_05	14673_2#33	ACTIVE_BACTERIAL_CORE_SURVEILLANCE	UNITED STATES	MINNESOTA	CDC	2004	BACTEREMIA	BLOOD	ERR742450	ERS558147	460	64	6A	0.06	S	S	<=0.03	S	<=0.06	S	<=0.06	S	S	<=0.5	S	S	<=0.5	S	0.06	S	0.06	S	<=1	S	<=2	S	NEG	>=4	R	<=0.25	S	<=0.25	S	<=2	S	<=2	S
2245STDY6020262	4748_99	GPS_US_4748_99_R1	15608_3#9	ACTIVE_BACTERIAL_CORE_SURVEILLANCE	UNITED STATES	GEORGIA	CDC	1999	BACTEREMIA	BLOOD	ERR876534	ERS628706	218	32	12F	<=0.03	S	S	<=0.03	S	<=0.06	S	<=0.06	S	S	<=0.5	S	S	<=0.5	S	0.06	S	0.06	S	<=1	S	<=2	S	NEG	0.5	S	<=0.25	S	<=0.25	S	<=2	S	<=2	S
2245STDY6020202	4805_00	GPS_US_4805_00_R1	15608_2#45	ACTIVE_BACTERIAL_CORE_SURVEILLANCE	UNITED STATES	MARYLAND	CDC	1999	BACTEREMIA	BLOOD	ERR876475	ERS628638	205	27	4	<=0.03	S	S	<=0.03	S	<=0.06	S	<=0.06	S	S	<=0.5	S	S	<=0.5	S	0.06	S	0.06	S	<=1	S	<=2	S	NEG	0.5	S	<=0.25	S	<=0.25	S	<=2	S	<=2	S
2245STDY5982600	4848_02	GPS_US_4848_02	14673_2#75	ACTIVE_BACTERIAL_CORE_SURVEILLANCE	UNITED STATES	CALIFORNIA	CDC	2002	BACTEREMIA	BLOOD	ERR742487	ERS558189	133	50	18B	<=0.03	S	S	<=0.03	S	<=0.06	S	<=0.06	S	S	<=0.5	S	S	<=0.5	S	0.06	S	0.06	S	<=1	S	<=2	S	NEG	2	I	<=0.25	S	<=0.25	S	<=2	S	<=2	S
2245STDY6020203	4851_00	GPS_US_4851_00_R1	15608_2#46	ACTIVE_BACTERIAL_CORE_SURVEILLANCE	UNITED STATES	MARYLAND	CDC	1999	BACTEREMIA	BLOOD	ERR876476	ERS628639	638	50	18C	<=0.03	S	S	<=0.03	S	<=0.06	S	<=0.06	S	S	<=0.5	S	S	<=0.5	S	0.06	S	0.06	S	<=1	S	<=2	S	NEG	0.5	S	<=0.25	S	<=0.25	S	<=2	S	<=2	S
2245STDY6020227	4918_00	GPS_US_4918_00_R1	15608_2#70	ACTIVE_BACTERIAL_CORE_SURVEILLANCE	UNITED STATES	CONNECTICUT	CDC	1999	BACTEREMIA	BLOOD	ERR876500	ERS628663	628	7	23F	<=0.03	S	S	<=0.03	S	<=0.06	S	<=0.06	S	S	<=0.5	S	S	<=0.5	S	0.06	S	0.06	S	<=1	S	<=2	S	NEG	0.5	S	<=0.25	S	<=0.25	S	<=2	S	<=2	S
2245STDY6020252	5108_99	GPS_US_5108_99_R1	15608_2#95	ACTIVE_BACTERIAL_CORE_SURVEILLANCE	UNITED STATES	TENNESSEE	CDC	1999	BACTEREMIA	BLOOD	ERR876525	ERS628718	641	23	6B	4	R	I	8	R	1	R	1	I	S	1	I	S	>2	R	8	R	0.06	S	<=1	S	<=2	S	NEG	>=4	R	<=0.25	S	<=0.25	S	<=2	S	<=2	S
2245STDY5982569	5127_01	GPS_US_5127_01	14673_2#44	ACTIVE_BACTERIAL_CORE_SURVEILLANCE	UNITED STATES	CALIFORNIA	CDC	2001	BACTEREMIA	BLOOD	ERR742460	ERS558158	133	50	18C	<=0.03	S	S	<=0.03	S	<=0.06	S	<=0.06	S	S	<=0.5	S	S	<=0.5	S	0.06	S	0.06	S	<=1	S	<=2	S	NEG	2	I	<=0.25	S	<=0.25	S	<=2	S	<=2	S
2245STDY5982465	5135_03	GPS_US_5135_03	14673_1#36	ACTIVE_BACTERIAL_CORE_SURVEILLANCE	UNITED STATES	MARYLAND	CDC	2001	BACTEREMIA	BLOOD	ERR742363	ERS558055	81	16	23F	2	R	S	2	S	0.5	I	1	I	S	1	I	S	>2	R	8	R	0.06	S	<=1	S	<=2	S	NEG	>=4	R	>8	R	>=1	R	<=2	S	>=8	R
2245STDY6020177	5167_99	GPS_US_5167_99_R1	15608_2#20	ACTIVE_BACTERIAL_CORE_SURVEILLANCE	UNITED STATES	GEORGIA	CDC	1999	BACTEREMIA	BLOOD	ERR876450	ERS628613	251	119	19F	<=0.03	S	S	<=0.03	S	<=0.06	S	<=0.06	S	S	<=0.5	S	S	<=0.5	S	0.06	S	0.06	S	<=1	S	<=2	S	NEG	0.5	S	<=0.25	S	<=0.25	S	<=2	S	<=2	S
2245STDY5982460	5186_02	GPS_US_5186_02	14673_1#31	ACTIVE_BACTERIAL_CORE_SURVEILLANCE	UNITED STATES	OREGON	CDC	2000	BACTEREMIA	BLOOD	ERR742360	ERS558050	113	50	18B	<=0.03	S	S	<=0.03	S	<=0.06	S	<=0.06	S	S	<=0.5	S	S	<=0.5	S	0.06	S	0.06	S	<=1	S	<=2	S	NEG	0.5	S	<=0.25	S	<=0.25	S	<=2	S	<=2	S
2245STDY5982438	5187_01	GPS_US_5187_01	14673_1#9	ACTIVE_BACTERIAL_CORE_SURVEILLANCE	UNITED STATES	TENNESSEE	CDC	2000	BACTEREMIA	BLOOD	ERR742342	ERS558028	124	39	14	<=0.03	S	S	<=0.03	S	<=0.06	S	<=0.06	S	S	<=0.5	S	S	<=0.5	S	0.06	S	0.06	S	<=1	S	<=2	S	NEG	0.5	S	<=0.25	S	<=0.25	S	<=2	S	<=2	S
2245STDY5982598	5187_03	GPS_US_5187_03	14673_2#73	ACTIVE_BACTERIAL_CORE_SURVEILLANCE	UNITED STATES	GEORGIA	CDC	2003	BACTEREMIA	BLOOD	ERR742485	ERS558187	62	3	11A	<=0.03	S	S	<=0.03	S	<=0.06	S	<=0.06	S	S	<=0.5	S	S	<=0.5	S	0.06	S	0.06	S	<=1	S	<=2	S	NEG	0.5	S	<=0.25	S	<=0.25	S	<=2	S	<=2	S
2245STDY5982471	5235_00	GPS_US_5235_00	14673_1#42	ACTIVE_BACTERIAL_CORE_SURVEILLANCE	UNITED STATES	GEORGIA	CDC	2000	BACTEREMIA	BLOOD	ERR742368	ERS558061	81	16	19F	2	R	S	1	S	0.25	S	0.5	S	S	1	I	S	>2	R	8	R	0.06	S	<=1	S	<=2	S	NEG	>=4	R	>8	R	>=1	R	<=2	S	>=8	R
2245STDY6020225	5254_03	GPS_US_5254_03_R1	15608_2#68	ACTIVE_BACTERIAL_CORE_SURVEILLANCE	UNITED STATES	MINNESOTA	CDC	1999	BACTEREMIA	BLOOD	ERR876498	ERS628661	193	11	19A	<=0.03	S	S	<=0.03	S	<=0.06	S	<=0.06	S	S	<=0.5	S	S	<=0.5	S	8	R	0.06	S	<=1	S	<=2	S	NEG	>=4	R	<=0.25	S	<=0.25	S	<=2	S	<=2	S
2245STDY6020191	5265_98	GPS_US_5265_98_R1	15608_2#34	ACTIVE_BACTERIAL_CORE_SURVEILLANCE	UNITED STATES	GEORGIA	CDC	1998	BACTEREMIA	BLOOD	ERR876464	ERS628627	247	27	4	<=0.03	S	S	<=0.03	S	<=0.06	S	<=0.06	S	S	<=0.5	S	S	<=0.5	S	0.06	S	0.06	S	<=1	S	<=2	S	NEG	0.5	S	<=0.25	S	<=0.25	S	<=2	S	<=2	S
2245STDY6020271	5304_03	GPS_US_5304_03_R1	15608_3#18	ACTIVE_BACTERIAL_CORE_SURVEILLANCE	UNITED STATES	MINNESOTA	CDC	1999	BACTEREMIA	BLOOD	ERR876543	ERS628719	36	7	23F	<=0.03	S	S	<=0.03	S	<=0.06	S	<=0.06	S	S	<=0.5	S	S	<=0.5	S	0.06	S	0.06	S	<=1	S	<=2	S	NEG	0.5	S	<=0.25	S	<=0.25	S	<=2	S	<=2	S
2245STDY5982726	5307_05	GPS_US_5307_05	14673_4#9	ACTIVE_BACTERIAL_CORE_SURVEILLANCE	UNITED STATES	NEW YORK	CDC	2004	BACTEREMIA	BLOOD	ERR742605	ERS558313	667	4	19A	<=0.03	S	S	<=0.03	S	<=0.06	S	<=0.06	S	S	<=0.5	S	S	<=0.5	S	0.06	S	0.06	S	<=1	S	<=2	S	NEG	0.5	S	<=0.25	S	<=0.25	S	<=2	S	<=2	S
2245STDY5982500	5339_08	GPS_US_5339_08	14673_1#71	ACTIVE_BACTERIAL_CORE_SURVEILLANCE	UNITED STATES	GEORGIA	CDC	2008	BACTEREMIA	BLOOD	ERR742396	ERS558090	12728	1	19A	4	R	I	8	R	1	R	4	R	R	4	R	R	>2	R	>32	R	>2	R	<=1	S	<=2	S	POS	>=4	R	>8	R	>=1	R	<=2	S	<=2	S
2245STDY5982560	5395_05	GPS_US_5395_05	14673_2#35	ACTIVE_BACTERIAL_CORE_SURVEILLANCE	UNITED STATES	TENNESSEE	CDC	2004	BACTEREMIA	BLOOD	ERR742452	ERS558149	199	4	19A	0.12	R	S	0.12	S	<=0.06	S	<=0.06	S	S	<=0.5	S	S	<=0.5	S	0.06	S	0.06	S	<=1	S	<=2	S	NEG	>=4	R	<=0.25	S	<=0.25	S	<=2	S	<=2	S
2245STDY5982672	5408_00	GPS_US_5408_00	14673_3#51	ACTIVE_BACTERIAL_CORE_SURVEILLANCE	UNITED STATES	TENNESSEE	CDC	2000	BACTEREMIA	BLOOD	ERR742552	ERS558260	246	27	4	<=0.03	S	S	<=0.03	S	<=0.06	S	<=0.06	S	S	<=0.5	S	S	<=0.5	S	0.06	S	0.06	S	<=1	S	<=2	S	NEG	2	I	<=0.25	S	<=0.25	S	<=2	S	<=2	S
2245STDY5982455	5416_00	GPS_US_5416_00	14673_1#26	ACTIVE_BACTERIAL_CORE_SURVEILLANCE	UNITED STATES	TENNESSEE	CDC	2000	BACTEREMIA	BLOOD	ERR742357	ERS558045	460	64	6A	0.06	S	S	<=0.03	S	<=0.06	S	<=0.06	S	S	<=0.5	S	S	<=0.5	S	0.06	S	0.06	S	<=1	S	<=2	S	NEG	>=4	R	<=0.25	S	<=0.25	S	<=2	S	<=2	S
2245STDY5982611	5448_07	GPS_US_5448_07	15277_1#21	ACTIVE_BACTERIAL_CORE_SURVEILLANCE	UNITED STATES	CONNECTICUT	CDC	2006	BACTEREMIA	BLOOD	ERR845754	ERS558200	191	15	7F	<=0.03	S	S	<=0.03	S	<=0.06	S	<=0.06	S	S	<=0.5	S	S	<=0.5	S	0.06	S	0.06	S	<=1	S	<=2	S	NEG	0.5	S	<=0.25	S	<=0.25	S	<=2	S	<=2	S
2245STDY5982673	5482_02	GPS_US_5482_02	14673_3#52	ACTIVE_BACTERIAL_CORE_SURVEILLANCE	UNITED STATES	NEW YORK	CDC	2002	BACTEREMIA	BLOOD	ERR742553	ERS558261	36	7	23F	<=0.03	S	S	<=0.03	S	<=0.06	S	<=0.06	S	S	<=0.5	S	S	<=0.5	S	0.06	S	0.06	S	<=1	S	<=2	S	NEG	0.5	S	<=0.25	S	<=0.25	S	<=2	S	<=2	S
2245STDY5982587	5590_01	GPS_US_5590_01	15277_1#18	ACTIVE_BACTERIAL_CORE_SURVEILLANCE	UNITED STATES	OREGON	CDC	2001	BACTEREMIA	BLOOD	ERR845751	ERS558176	13	18	14	<=0.03	S	S	<=0.03	S	<=0.06	S	0.12	S	S	<=0.5	S	S	<=0.5	S	8	R	0.06	S	<=1	S	<=2	S	NEG	>=4	R	<=0.25	S	<=0.25	S	<=2	S	<=2	S
2245STDY5982472	5773_06	GPS_US_5773_06	14673_1#43	ACTIVE_BACTERIAL_CORE_SURVEILLANCE	UNITED STATES	COLORADO	CDC	2005	BACTEREMIA	BLOOD	ERR742369	ERS558062	667	4	19A	<=0.03	S	S	<=0.03	S	<=0.06	S	<=0.06	S	S	<=0.5	S	S	<=0.5	S	0.06	S	0.06	S	<=1	S	<=2	S	NEG	0.5	S	<=0.25	S	<=0.25	S	<=2	S	<=2	S
2245STDY5982540	5808_04	GPS_US_5808_04	14673_2#15	ACTIVE_BACTERIAL_CORE_SURVEILLANCE	UNITED STATES	GEORGIA	CDC	2004	BACTEREMIA	BLOOD	ERR742434	ERS558129	2705	3	33F	<=0.03	S	S	<=0.03	S	<=0.06	S	<=0.06	S	S	<=0.5	S	S	<=0.5	S	8	R	0.06	S	<=1	S	<=2	S	NEG	2	I	<=0.25	S	<=0.25	S	<=2	S	<=2	S
2245STDY5982548	5817_03	GPS_US_5817_03	14673_2#23	ACTIVE_BACTERIAL_CORE_SURVEILLANCE	UNITED STATES	TENNESSEE	CDC	2002	BACTEREMIA	BLOOD	ERR742441	ERS558137	146	23	6B	<=0.03	S	S	<=0.03	S	<=0.06	S	<=0.06	S	S	<=0.5	S	S	<=0.5	S	0.06	S	0.06	S	<=1	S	<=2	S	NEG	0.5	S	<=0.25	S	<=0.25	S	<=2	S	<=2	S
2245STDY6020280	5911_99	GPS_US_5911_99_R1	15608_3#27	ACTIVE_BACTERIAL_CORE_SURVEILLANCE	UNITED STATES	GEORGIA	CDC	1999	BACTEREMIA	BLOOD	ERR876552	ERS628728	3060	50	18C	<=0.03	S	S	<=0.03	S	<=0.06	S	<=0.06	S	S	<=0.5	S	S	<=0.5	S	0.06	S	0.06	S	<=1	S	<=2	S	NEG	0.5	S	<=0.25	S	<=0.25	S	<=2	S	<=2	S
2245STDY5982651	5949_01	GPS_US_5949_01	14673_3#30	ACTIVE_BACTERIAL_CORE_SURVEILLANCE	UNITED STATES	NEW YORK	CDC	2001	BACTEREMIA	BLOOD	ERR742532	ERS558239	338	5	23A	0.25	R	S	0.25	S	<=0.06	S	0.12	S	S	<=0.5	S	S	<=0.5	S	0.06	S	0.06	S	<=1	S	<=2	S	NEG	2	I	<=0.25	S	<=0.25	S	<=2	S	<=2	S
2245STDY5982612	5993_07	GPS_US_5993_07	14673_2#87	ACTIVE_BACTERIAL_CORE_SURVEILLANCE	UNITED STATES	CALIFORNIA	CDC	2006	BACTEREMIA	BLOOD	ERR742497	ERS558201	393	38	38	<=0.03	S	S	<=0.03	S	<=0.06	S	<=0.06	S	S	<=0.5	S	S	<=0.5	S	0.06	S	0.06	S	<=1	S	<=2	S	NEG	0.5	S	<=0.25	S	<=0.25	S	<=2	S	<=2	S
2245STDY6020278	5999_99	GPS_US_5999_99_R1	15608_3#25	ACTIVE_BACTERIAL_CORE_SURVEILLANCE	UNITED STATES	GEORGIA	CDC	1999	BACTEREMIA	BLOOD	ERR876550	ERS628726	156	6	9V	2	R	S	2	S	0.5	I	1	I	S	1	I	S	>2	R	0.06	S	0.06	S	<=1	S	<=2	S	NEG	>=4	R	<=0.25	S	<=0.25	S	<=2	S	<=2	S
2245STDY5982638	6023_01	GPS_US_6023_01	14673_3#17	ACTIVE_BACTERIAL_CORE_SURVEILLANCE	UNITED STATES	NEW YORK	CDC	2001	BACTEREMIA	BLOOD	ERR742520	ERS558226	695	27	4	<=0.03	S	S	<=0.03	S	<=0.06	S	<=0.06	S	S	<=0.5	S	S	<=0.5	S	0.06	S	0.06	S	<=1	S	<=2	S	NEG	0.5	S	<=0.25	S	<=0.25	S	<=2	S	<=2	S
2245STDY5982466	6023_03	GPS_US_6023_03	14673_1#37	ACTIVE_BACTERIAL_CORE_SURVEILLANCE	UNITED STATES	CALIFORNIA	CDC	2003	BACTEREMIA	BLOOD	ERR742364	ERS558056	654	119	19F	<=0.03	S	S	<=0.03	S	<=0.06	S	<=0.06	S	S	<=0.5	S	S	<=0.5	S	0.06	S	0.06	S	<=1	S	<=2	S	NEG	0.5	S	<=0.25	S	<=0.25	S	<=2	S	<=2	S
2245STDY5982467	6025_03	GPS_US_6025_03	14673_1#38	ACTIVE_BACTERIAL_CORE_SURVEILLANCE	UNITED STATES	CALIFORNIA	CDC	2003	BACTEREMIA	BLOOD	ERR742365	ERS558057	156	6	9V	2	R	S	2	S	0.5	I	1	I	S	1	I	S	>2	R	8	R	0.06	S	<=1	S	<=2	S	NEG	>=4	R	<=0.25	S	<=0.25	S	<=2	S	<=2	S
2245STDY5982546	6048_01	GPS_US_6048_01	14673_2#21	ACTIVE_BACTERIAL_CORE_SURVEILLANCE	UNITED STATES	NEW YORK	CDC	2001	BACTEREMIA	BLOOD	ERR742440	ERS558135	251	119	19F	<=0.03	S	S	<=0.03	S	<=0.06	S	<=0.06	S	S	<=0.5	S	S	<=0.5	S	0.06	S	0.06	S	<=1	S	<=2	S	NEG	0.5	S	<=0.25	S	<=0.25	S	<=2	S	<=2	S
2245STDY5982573	6143_05	GPS_US_6143_05	14673_2#48	ACTIVE_BACTERIAL_CORE_SURVEILLANCE	UNITED STATES	MARYLAND	CDC	2004	BACTEREMIA	BLOOD	ERR742463	ERS558162	10148	156	16F	0.06	S	S	<=0.03	S	<=0.06	S	0.12	S	S	<=0.5	S	S	<=0.5	S	0.06	S	0.06	S	<=1	S	<=2	S	NEG	0.5	S	<=0.25	S	<=0.25	S	<=2	S	<=2	S
2245STDY5982452	6161_00	GPS_US_6161_00	14673_1#23	ACTIVE_BACTERIAL_CORE_SURVEILLANCE	UNITED STATES	TENNESSEE	CDC	2000	BACTEREMIA	BLOOD	ERR742355	ERS558042	124	39	14	<=0.03	S	S	<=0.03	S	<=0.06	S	<=0.06	S	S	<=0.5	S	S	<=0.5	S	0.06	S	0.06	S	<=1	S	<=2	S	NEG	0.5	S	<=0.25	S	<=0.25	S	<=2	S	<=2	S
2245STDY5982453	6163_00	GPS_US_6163_00	15277_1#5	ACTIVE_BACTERIAL_CORE_SURVEILLANCE	UNITED STATES	CALIFORNIA	CDC	2000	BACTEREMIA	BLOOD	ERR845738	ERS558043	251	119	19F	<=0.03	S	S	<=0.03	S	<=0.06	S	<=0.06	S	S	<=0.5	S	S	<=0.5	S	0.06	S	0.06	S	<=1	S	<=2	S	NEG	0.5	S	<=0.25	S	<=0.25	S	<=2	S	<=2	S
2245STDY5982485	6205_04	GPS_US_6205_04	14673_1#56	ACTIVE_BACTERIAL_CORE_SURVEILLANCE	UNITED STATES	COLORADO	CDC	2003	BACTEREMIA	BLOOD	ERR742381	ERS558075	12727	363	3	<=0.03	S	S	<=0.03	S	<=0.06	S	<=0.06	S	S	<=0.5	S	S	<=0.5	S	0.06	S	0.06	S	<=1	S	<=2	S	NEG	0.5	S	<=0.25	S	<=0.25	S	<=2	S	<=2	S
2245STDY5982550	6226_00	GPS_US_6226_00	14673_2#25	ACTIVE_BACTERIAL_CORE_SURVEILLANCE	UNITED STATES	MARYLAND	CDC	2000	BACTEREMIA	BLOOD	ERR742443	ERS558139	899	27	4	<=0.03	S	S	<=0.03	S	<=0.06	S	<=0.06	S	S	<=0.5	S	S	<=0.5	S	0.06	S	0.06	S	<=1	S	<=2	S	NEG	0.5	S	<=0.25	S	<=0.25	S	<=2	S	<=2	S
2245STDY5982699	6355_04	GPS_US_6355_04	14673_3#78	ACTIVE_BACTERIAL_CORE_SURVEILLANCE	UNITED STATES	NEW YORK	CDC	2003	BACTEREMIA	BLOOD	ERR742579	ERS558287	695	27	4	<=0.03	S	S	<=0.03	S	<=0.06	S	<=0.06	S	S	<=0.5	S	S	<=0.5	S	0.06	S	0.06	S	<=1	S	<=2	S	NEG	0.5	S	<=0.25	S	<=0.25	S	<=2	S	<=2	S
2245STDY5982701	6455_07	GPS_US_6455_07	14673_3#80	ACTIVE_BACTERIAL_CORE_SURVEILLANCE	UNITED STATES	NEW YORK	CDC	2007	BACTEREMIA	BLOOD	ERR742581	ERS558289	191	15	7F	<=0.03	S	S	<=0.03	S	<=0.06	S	<=0.06	S	S	<=0.5	S	S	<=0.5	S	0.06	S	0.06	S	<=1	S	<=2	S	NEG	0.5	S	<=0.25	S	<=0.25	S	<=2	S	<=2	S
2245STDY5982655	6548_05	GPS_US_6548_05	14673_3#34	ACTIVE_BACTERIAL_CORE_SURVEILLANCE	UNITED STATES	NEW YORK	CDC	2005	BACTEREMIA	BLOOD	ERR742536	ERS558243	393	38	38	<=0.03	S	S	<=0.03	S	<=0.06	S	<=0.06	S	S	<=0.5	S	S	<=0.5	S	0.06	S	0.06	S	<=1	S	<=2	S	NEG	0.5	S	<=0.25	S	<=0.25	S	<=2	S	<=2	S
2245STDY5982574	6779_05	GPS_US_6779_05	14673_2#49	ACTIVE_BACTERIAL_CORE_SURVEILLANCE	UNITED STATES	CONNECTICUT	CDC	2005	BACTEREMIA	BLOOD	ERR742464	ERS558163	433	19	22F	<=0.03	S	S	<=0.03	S	<=0.06	S	<=0.06	S	S	<=0.5	S	S	<=0.5	S	0.06	S	0.06	S	<=1	S	<=2	S	NEG	0.5	S	<=0.25	S	<=0.25	S	<=2	S	<=2	S
2245STDY5982601	6895_06	GPS_US_6895_06	14673_2#76	ACTIVE_BACTERIAL_CORE_SURVEILLANCE	UNITED STATES	MINNESOTA	CDC	2005	BACTEREMIA	BLOOD	ERR742488	ERS558190	320	1	19A	4	R	I	8	R	1	R	2	R	I	2	R	I	>2	R	>32	R	>2	R	<=1	S	<=2	S	POS	>=4	R	>8	R	>=1	R	<=2	S	<=2	S
2245STDY5982551	6935_04	GPS_US_6935_04	14673_2#26	ACTIVE_BACTERIAL_CORE_SURVEILLANCE	UNITED STATES	OREGON	CDC	2004	BACTEREMIA	BLOOD	ERR742444	ERS558140	8495	131	15B/15C	<=0.03	S	S	<=0.03	S	<=0.06	S	<=0.06	S	S	<=0.5	S	S	<=0.5	S	0.06	S	0.06	S	<=1	S	<=2	S	NEG	>=4	R	<=0.25	S	<=0.25	S	<=2	S	<=2	S
2245STDY6020178	7009_99	GPS_US_7009_99_R1	15608_2#21	ACTIVE_BACTERIAL_CORE_SURVEILLANCE	UNITED STATES	NEW YORK	CDC	1998	BACTEREMIA	BLOOD	ERR876451	ERS628614	1060	23	6B	0.06	S	S	0.12	S	0.12	S	0.12	S	S	<=0.5	S	S	<=0.5	S	0.06	S	0.06	S	<=1	S	<=2	S	NEG	0.5	S	<=0.25	S	<=0.25	S	<=2	S	<=2	S
2245STDY5982529	7015_03	GPS_US_7015_03	14673_2#4	ACTIVE_BACTERIAL_CORE_SURVEILLANCE	UNITED STATES	COLORADO	CDC	2003	BACTEREMIA	BLOOD	ERR742424	ERS558118	199	4	19A	0.12	R	S	0.12	S	<=0.06	S	<=0.06	S	S	<=0.5	S	S	<=0.5	S	0.06	S	0.06	S	<=1	S	<=2	S	NEG	0.5	S	<=0.25	S	<=0.25	S	<=2	S	<=2	S
2245STDY5982561	7051_03	GPS_US_7051_03	14673_2#36	ACTIVE_BACTERIAL_CORE_SURVEILLANCE	UNITED STATES	MINNESOTA	CDC	2000	BACTEREMIA	BLOOD	ERR742453	ERS558150	460	64	6A	0.06	S	S	<=0.03	S	<=0.06	S	<=0.06	S	S	<=0.5	S	S	<=0.5	S	0.06	S	0.06	S	<=1	S	<=2	S	NEG	>=4	R	<=0.25	S	<=0.25	S	<=2	S	<=2	S
2245STDY6020264	7073_99	GPS_US_7073_99_R1	15608_3#11	ACTIVE_BACTERIAL_CORE_SURVEILLANCE	UNITED STATES	NEW YORK	CDC	1999	BACTEREMIA	BLOOD	ERR876536	ERS628709	12755	3	11A	<=0.03	S	S	<=0.03	S	<=0.06	S	<=0.06	S	S	<=0.5	S	S	<=0.5	S	0.06	S	0.06	S	<=1	S	<=2	S	NEG	2	I	<=0.25	S	<=0.25	S	<=2	S	<=2	S
2245STDY5982575	7077_05	GPS_US_7077_05	14673_2#50	ACTIVE_BACTERIAL_CORE_SURVEILLANCE	UNITED STATES	NEW YORK	CDC	2005	BACTEREMIA	BLOOD	ERR742465	ERS558164	695	27	19A	0.12	R	S	0.06	S	<=0.06	S	<=0.06	S	S	<=0.5	S	S	<=0.5	S	0.06	S	0.06	S	<=1	S	<=2	S	NEG	0.5	S	<=0.25	S	<=0.25	S	<=2	S	<=2	S
2245STDY5982488	7090_07	GPS_US_7090_07	14673_1#59	ACTIVE_BACTERIAL_CORE_SURVEILLANCE	UNITED STATES	CALIFORNIA	CDC	2006	BACTEREMIA	BLOOD	ERR742384	ERS558078	654	119	19F	<=0.03	S	S	<=0.03	S	<=0.06	S	<=0.06	S	S	<=0.5	S	S	<=0.5	S	0.06	S	0.06	S	<=1	S	<=2	S	NEG	0.5	S	<=0.25	S	<=0.25	S	<=2	S	<=2	S
2245STDY6020213	7109_99	GPS_US_7109_99_R1	15608_2#56	ACTIVE_BACTERIAL_CORE_SURVEILLANCE	UNITED STATES	NEW YORK	CDC	1999	BACTEREMIA	BLOOD	ERR876486	ERS628649	469	24	6B	<=0.03	S	S	<=0.03	S	<=0.06	S	<=0.06	S	S	<=0.5	S	S	<=0.5	S	8	R	0.06	S	<=1	S	<=2	S	NEG	0.5	S	<=0.25	S	<=0.25	S	<=2	S	<=2	S
2245STDY6020179	7111_99	GPS_US_7111_99_R1	15608_2#22	ACTIVE_BACTERIAL_CORE_SURVEILLANCE	UNITED STATES	NEW YORK	CDC	1999	BACTEREMIA	BLOOD	ERR876452	ERS628615	13	18	14	<=0.03	S	S	<=0.03	S	<=0.06	S	<=0.06	S	S	<=0.5	S	S	<=0.5	S	0.06	S	0.06	S	<=1	S	<=2	S	NEG	0.5	S	<=0.25	S	<=0.25	S	<=2	S	<=2	S
2245STDY6020208	7147_99	GPS_US_7147_99_R1	15608_2#51	ACTIVE_BACTERIAL_CORE_SURVEILLANCE	UNITED STATES	NEW YORK	CDC	1999	BACTEREMIA	BLOOD	ERR876481	ERS628644	9749	7	23F	0.12	R	S	0.12	S	0.12	S	0.12	S	S	<=0.5	S	S	<=0.5	S	0.06	S	0.06	S	<=1	S	<=2	S	NEG	0.5	S	<=0.25	S	<=0.25	S	<=2	S	<=2	S
2245STDY6020180	7247_99	GPS_US_7247_99_R1	15608_2#23	ACTIVE_BACTERIAL_CORE_SURVEILLANCE	UNITED STATES	TENNESSEE	CDC	1999	BACTEREMIA	BLOOD	ERR876453	ERS628616	37	7	23F	4	R	I	8	R	>1	R	8	R	R	4	R	R	>2	R	8	R	0.06	S	<=1	S	<=2	S	NEG	>=4	R	<=0.25	S	<=0.25	S	<=2	S	<=2	S
2245STDY5982577	7266_05	GPS_US_7266_05	14673_2#52	ACTIVE_BACTERIAL_CORE_SURVEILLANCE	UNITED STATES	TENNESSEE	CDC	2005	BACTEREMIA	BLOOD	ERR742467	ERS558166	220	32	12F	<=0.03	S	S	<=0.03	S	<=0.06	S	<=0.06	S	S	<=0.5	S	S	<=0.5	S	0.06	S	0.06	S	<=1	S	<=2	S	NEG	0.5	S	<=0.25	S	<=0.25	S	<=2	S	<=2	S
2245STDY5982702	7519_07	GPS_US_7519_07	14673_3#81	ACTIVE_BACTERIAL_CORE_SURVEILLANCE	UNITED STATES	NEW MEXICO	CDC	2007	BACTEREMIA	BLOOD	ERR742582	ERS558290	227	31	1	<=0.03	S	S	<=0.03	S	<=0.06	S	<=0.06	S	S	<=0.5	S	S	<=0.5	S	0.06	S	0.06	S	<=1	S	<=2	S	NEG	0.5	S	<=0.25	S	<=0.25	S	<=2	S	<=2	S
2245STDY5982490	7574_07	GPS_US_7574_07	14673_1#61	ACTIVE_BACTERIAL_CORE_SURVEILLANCE	UNITED STATES	NEW MEXICO	CDC	2007	BACTEREMIA	BLOOD	ERR742386	ERS558080	10149	5	23B	0.25	R	S	0.06	S	<=0.06	S	<=0.06	S	S	<=0.5	S	S	<=0.5	S	0.06	S	0.06	S	<=1	S	<=2	S	NEG	>=4	R	<=0.25	S	<=0.25	S	<=2	S	<=2	S
2245STDY5982552	7618_04	GPS_US_7618_04	14673_2#27	ACTIVE_BACTERIAL_CORE_SURVEILLANCE	UNITED STATES	COLORADO	CDC	2004	BACTEREMIA	BLOOD	ERR742445	ERS558141	199	4	19A	0.12	R	S	0.12	S	<=0.06	S	<=0.06	S	S	<=0.5	S	S	<=0.5	S	0.06	S	0.06	S	<=1	S	<=2	S	NEG	0.5	S	<=0.25	S	<=0.25	S	<=2	S	<=2	S
2245STDY5982643	7637_04	GPS_US_7637_04	14673_3#22	ACTIVE_BACTERIAL_CORE_SURVEILLANCE	UNITED STATES	COLORADO	CDC	2004	BACTEREMIA	BLOOD	ERR742525	ERS558231	227	31	1	<=0.03	S	S	<=0.03	S	<=0.06	S	<=0.06	S	S	<=0.5	S	S	<=0.5	S	0.06	S	0.06	S	<=1	S	<=2	S	NEG	0.5	S	<=0.25	S	<=0.25	S	<=2	S	<=2	S
2245STDY6020185	7678_99	GPS_US_7678_99_R1	15608_2#28	ACTIVE_BACTERIAL_CORE_SURVEILLANCE	UNITED STATES	MARYLAND	CDC	1999	BACTEREMIA	BLOOD	ERR876458	ERS628621	655	316	19F	<=0.03	S	S	<=0.03	S	<=0.06	S	<=0.06	S	S	<=0.5	S	S	<=0.5	S	0.06	S	0.06	S	<=1	S	<=2	S	NEG	2	I	<=0.25	S	<=0.25	S	<=2	S	<=2	S
2245STDY5982564	7711_03	GPS_US_7711_03	14673_2#39	ACTIVE_BACTERIAL_CORE_SURVEILLANCE	UNITED STATES	MINNESOTA	CDC	2000	BACTEREMIA	BLOOD	ERR742455	ERS558153	384	23	6B	4	R	I	8	R	>1	R	1	I	S	1	I	S	>2	R	8	R	0.06	S	<=1	S	<=2	S	NEG	>=4	R	>8	R	>=1	R	<=2	S	<=2	S
2245STDY5982646	7726_03	GPS_US_7726_03	14673_3#25	ACTIVE_BACTERIAL_CORE_SURVEILLANCE	UNITED STATES	MINNESOTA	CDC	2000	BACTEREMIA	BLOOD	ERR742528	ERS558234	3060	50	18C	<=0.03	S	S	<=0.03	S	<=0.06	S	<=0.06	S	S	<=0.5	S	S	<=0.5	S	0.06	S	0.06	S	<=1	S	<=2	S	NEG	0.5	S	<=0.25	S	<=0.25	S	<=2	S	<=2	S
2245STDY5982565	7735_03	GPS_US_7735_03	14673_2#40	ACTIVE_BACTERIAL_CORE_SURVEILLANCE	UNITED STATES	MINNESOTA	CDC	2000	BACTEREMIA	BLOOD	ERR742456	ERS558154	393	38	38	<=0.03	S	S	<=0.03	S	<=0.06	S	<=0.06	S	S	<=0.5	S	S	<=0.5	S	0.06	S	0.06	S	<=1	S	<=2	S	NEG	0.5	S	<=0.25	S	<=0.25	S	<=2	S	<=2	S
2245STDY5982647	7737_03	GPS_US_7737_03	14673_3#26	ACTIVE_BACTERIAL_CORE_SURVEILLANCE	UNITED STATES	MINNESOTA	CDC	2000	BACTEREMIA	BLOOD	ERR742529	ERS558235	124	39	14	<=0.03	S	S	<=0.03	S	<=0.06	S	<=0.06	S	S	<=0.5	S	S	<=0.5	S	0.06	S	0.06	S	<=1	S	<=2	S	NEG	0.5	S	<=0.25	S	<=0.25	S	<=2	S	<=2	S
2245STDY5982566	7741_03	GPS_US_7741_03	14673_2#41	ACTIVE_BACTERIAL_CORE_SURVEILLANCE	UNITED STATES	MINNESOTA	CDC	2000	BACTEREMIA	BLOOD	ERR742457	ERS558155	671	6	14	0.12	R	S	0.12	S	0.12	S	0.12	S	S	<=0.5	S	S	<=0.5	S	8	R	0.06	S	<=1	S	<=2	S	NEG	>=4	R	<=0.25	S	<=0.25	S	<=2	S	<=2	S
2245STDY6329057	7752_03	GPS_US_7752_03	21053_8#35	ACTIVE_BACTERIAL_CORE_SURVEILLANCE	UNITED STATES	MINNESOTA	CDC	2000	BACTEREMIA	BLOOD	ERR1788047	ERS1299754	220	32	12F	<=0.03	S	S	<=0.03	S	<=0.06	S	<=0.06	S	S	<=0.5	S	S	<=0.5	S	0.06	S	0.06	S	<=1	S	<=2	S	NEG	0.5	S	<=0.25	S	<=0.25	S	<=2	S	<=2	S
2245STDY5982576	7886_05	GPS_US_7886_05	14673_2#51	ACTIVE_BACTERIAL_CORE_SURVEILLANCE	UNITED STATES	MINNESOTA	CDC	2005	BACTEREMIA	BLOOD	ERR742466	ERS558165	292	324	19A	<=0.03	S	S	<=0.03	S	<=0.06	S	<=0.06	S	S	<=0.5	S	S	<=0.5	S	0.06	S	0.06	S	<=1	S	<=2	S	NEG	0.5	S	<=0.25	S	<=0.25	S	<=2	S	<=2	S
2245STDY5982493	8290_07	GPS_US_8290_07	14673_1#64	ACTIVE_BACTERIAL_CORE_SURVEILLANCE	UNITED STATES	TENNESSEE	CDC	2007	BACTEREMIA	BLOOD	ERR742389	ERS558083	2346	16	19A	2	R	S	2	S	0.5	I	1	I	S	1	I	S	>2	R	>32	R	>2	R	<=1	S	<=2	S	POS	>=4	R	>8	R	>=1	R	<=2	S	>=8	R
2245STDY5982641	8408_04	GPS_US_8408_04	14673_3#20	ACTIVE_BACTERIAL_CORE_SURVEILLANCE	UNITED STATES	GEORGIA	CDC	2004	BACTEREMIA	BLOOD	ERR742523	ERS558229	199	4	15B/15C	<=0.03	S	S	<=0.03	S	<=0.06	S	<=0.06	S	S	<=0.5	S	S	<=0.5	S	0.06	S	0.06	S	<=1	S	<=2	S	NEG	0.5	S	<=0.25	S	<=0.25	S	<=2	S	<=2	S
2245STDY5982659	8423_05	GPS_US_8423_05	14673_3#38	ACTIVE_BACTERIAL_CORE_SURVEILLANCE	UNITED STATES	TENNESSEE	CDC	2005	BACTEREMIA	BLOOD	ERR742540	ERS558247	241	95	18A	<=0.03	S	S	<=0.03	S	<=0.06	S	<=0.06	S	S	<=0.5	S	S	<=0.5	S	0.06	S	0.06	S	<=1	S	<=2	S	NEG	0.5	S	>8	R	>=1	R	<=2	S	<=2	S
2245STDY5982494	8433_07	GPS_US_8433_07	14673_1#65	ACTIVE_BACTERIAL_CORE_SURVEILLANCE	UNITED STATES	NEW MEXICO	CDC	2007	BACTEREMIA	BLOOD	ERR742390	ERS558084	218	32	12F	<=0.03	S	S	<=0.03	S	<=0.06	S	<=0.06	S	S	<=0.5	S	S	<=0.5	S	0.06	S	0.06	S	<=1	S	<=2	S	NEG	0.5	S	<=0.25	S	<=0.25	S	<=2	S	<=2	S
2245STDY5982478	8445_06	GPS_US_8445_06	14673_1#49	ACTIVE_BACTERIAL_CORE_SURVEILLANCE	UNITED STATES	TENNESSEE	CDC	2006	BACTEREMIA	BLOOD	ERR742374	ERS558068	1756	4	19A	0.12	R	S	0.12	S	<=0.06	S	<=0.06	S	S	<=0.5	S	S	<=0.5	S	0.06	S	0.06	S	<=1	S	<=2	S	NEG	0.5	S	<=0.25	S	<=0.25	S	<=2	S	<=2	S
2245STDY5982616	8559_07	GPS_US_8559_07	14673_2#91	ACTIVE_BACTERIAL_CORE_SURVEILLANCE	UNITED STATES	MINNESOTA	CDC	2007	BACTEREMIA	BLOOD	ERR742501	ERS558205	218	32	12F	<=0.03	S	S	<=0.03	S	<=0.06	S	<=0.06	S	S	<=0.5	S	S	<=0.5	S	8	R	0.06	S	<=1	S	<=2	S	NEG	0.5	S	<=0.25	S	<=0.25	S	<=2	S	<=2	S
2245STDY5982459	9173_04	GPS_US_9173_04	14673_1#30	ACTIVE_BACTERIAL_CORE_SURVEILLANCE	UNITED STATES	TENNESSEE	CDC	2004	BACTEREMIA	BLOOD	ERR742359	ERS558049	433	19	22F	<=0.03	S	S	<=0.03	S	<=0.06	S	<=0.06	S	S	<=0.5	S	S	<=0.5	S	0.06	S	0.06	S	<=1	S	<=2	S	NEG	0.5	S	<=0.25	S	<=0.25	S	<=2	S	<=2	S
2245STDY5982476	9284_06	GPS_US_9284_06	14673_1#47	ACTIVE_BACTERIAL_CORE_SURVEILLANCE	UNITED STATES	MINNESOTA	CDC	2006	BACTEREMIA	BLOOD	ERR742372	ERS558066	1379	89	6C	<=0.03	S	S	<=0.03	S	<=0.06	S	<=0.06	S	S	<=0.5	S	S	<=0.5	S	0.06	S	0.06	S	<=1	S	<=2	S	NEG	0.5	S	<=0.25	S	<=0.25	S	<=2	S	<=2	S
2245STDY5982554	9483_04	GPS_US_9483_04	14673_2#29	ACTIVE_BACTERIAL_CORE_SURVEILLANCE	UNITED STATES	MARYLAND	CDC	2004	BACTEREMIA	BLOOD	ERR742447	ERS558143	320	1	19A	4	R	I	8	R	1	R	2	R	I	2	R	I	>2	R	>32	R	>2	R	<=1	S	<=2	S	POS	>=4	R	>8	R	>=1	R	<=2	S	<=2	S
2245STDY5982483	9693_04	GPS_US_9693_04	14673_1#54	ACTIVE_BACTERIAL_CORE_SURVEILLANCE	UNITED STATES	TENNESSEE	CDC	2004	BACTEREMIA	BLOOD	ERR742379	ERS558073	3065	11	15B/15C	<=0.03	S	S	<=0.03	S	<=0.06	S	<=0.06	S	S	<=0.5	S	S	<=0.5	S	0.06	S	0.06	S	<=1	S	<=2	S	NEG	2	I	<=0.25	S	<=0.25	S	<=2	S	<=2	S
[truncated: 4 more columns]

## Sheet: Data 9
#FILE	NUM_FOUND	cbpA	cbpD	cbpG	cps4A	cps4B	cps4C	cps4D	cps4E	cps4F	cps4G	cps4H	cps4I	cps4J	cps4K	cps4L	hysA	lytA	lytB	lytC	nanA	nanB	pavA	pce	pfbA	pitA	pitB	ply	psaA	pspA	pspC/cbpA	rrgA	rrgB	rrgC	sipA	srtC-1/srtB	srtC-2/srtC	srtC-3/srtD	srtG1	srtG2	zmpC
11826_1#21.unscaffolded_contigs_velvet.fa.tab	17	.	100	100	99.79	99.86	99.86	100	.	.	.	.	.	.	.	.	100	84.33	100	100	86.71	100	100	100	100	.	.	100	100	.	.	.	.	.	.	.	.	.	.	.	.
9950_2#28.unscaffolded_contigs_velvet.fa.tab	14	.	.	.	99.79	99.86	99.86	100	.	.	.	.	.	.	.	.	100	85.48	.	100	87.03	100	100	100	100	.	.	100	100	.	.	.	.	.	.	.	.	.	.	.	.
11511_7#34.unscaffolded_contigs_velvet.fa.tab	16	.	.	100	99.79	99.86	99.86	100	.	.	.	.	.	.	.	.	100	85.58	.	99.93	86.71	100	100	100	100	.	.	100	100	95.43	.	.	.	.	.	.	.	.	.	.	.
9950_3#14.unscaffolded_contigs_velvet.fa.tab	21	.	100	.	99.79	99.86	99.86	100	.	.	.	.	.	.	.	.	100	87.57	100	100	86.71	100	100	100	100	.	.	100	100	.	.	100	.	100	.	100	100	100	.	.	.
9950_3#25.unscaffolded_contigs_velvet.fa.tab	21	.	100	.	99.79	100	99.86	100	.	.	.	.	.	.	.	.	100	87.57	100	100	86.71	100	100	100	100	.	.	100	100	.	.	100.00;100.00	.	100.00;100.00	.	100.00;100.00	100.00;100.00	100.00;100.00	.	.	.
9950_3#81.unscaffolded_contigs_velvet.fa.tab	14	.	.	100	99.79	100	.	.	.	.	.	.	.	.	.	.	100	87.57	100	99.93	86.71	100	100	99.79	100	.	.	100	100	.	.	.	.	.	.	.	.	.	.	.	.
9950_1#42.unscaffolded_contigs_velvet.fa.tab	16	.	.	96.74	99.79	100	99.42	100	.	.	.	.	.	.	.	.	100	87.98	100	100	87.03	100	100	100	100	.	.	100	100	.	.	.	.	.	.	.	.	.	.	.	.
9950_3#21.unscaffolded_contigs_velvet.fa.tab	16	.	.	96.74	99.79	99.86	99.86	100	.	.	.	.	.	.	.	.	100	87.98	100	100	87.03	100	100	100	100	.	.	100	100	.	.	.	.	.	.	.	.	.	.	.	.
15608_2#21.unscaffolded_contigs_velvet.fa.tab	17	.	100	99.77	100	100	.	.	.	.	.	.	.	.	.	.	100	88.19	.	99.93	87.03	.	100	100	100	.	.	100	100	.	.	.	.	100	.	100	100	100	.	.	.
11511_7#79.unscaffolded_contigs_velvet.fa.tab	17	.	100	.	99.79	100	99.86	100	.	.	.	.	.	.	.	.	100	88.4	100	100	86.71	100	100	100	100	.	.	100	100	.	99.34	.	.	.	.	.	.	.	.	.	.
11657_2#15.unscaffolded_contigs_velvet.fa.tab	34	100	100	100	100	100	100	100	100	100	100	100	100	100	100	100	100	88.4	100	99.93	87.03	100	100	100	100	.	.	100	100	97.58	.	100	100	100	.	100	100	100	.	.	100
9950_3#48.unscaffolded_contigs_velvet.fa.tab	18	.	.	.	99.79	100	.	.	.	.	.	.	.	.	.	.	100	89.66	100	100	86.71	100	100	100	100	.	.	100	100	.	.	100	.	100	.	100	100	100	.	.	.
15608_2#20.unscaffolded_contigs_velvet.fa.tab	22	.	100	100	99.79	99.86	99.86	99.56	.	.	.	.	.	.	.	.	100	95.19	.	100	87.03	100	100	100	100	100	100	100	100	.	98.81	.	.	.	100	.	.	.	100	94.03	.
9950_2#85.unscaffolded_contigs_velvet.fa.tab	30	.	100	96.27	100	100	100	100	100	100	100	100	100	100	100	100	100	96.76	100	100	87.03	100	100	100	100	.	.	100	100	.	.	100	.	100	.	100	100	100	.	.	.
11511_7#15.unscaffolded_contigs_velvet.fa.tab	17	.	.	100	99.79	99.86	99.86	100	.	.	.	.	.	.	.	.	100	97.07	.	99.93	86.71	100	100	100	100	.	.	100	100	90.91	97.77	.	.	.	.	.	.	.	.	.	.
11657_1#75.unscaffolded_contigs_velvet.fa.tab	17	.	100	100	99.79	99.86	99.86	100	.	.	.	.	.	.	.	.	100	97.07	100	99.93	86.71	100	100	100	.	.	.	100	100	95.43	.	.	.	.	.	.	.	.	.	.	.
11657_8#68.unscaffolded_contigs_velvet.fa.tab	14	.	.	.	99.79	99.86	99.86	100	.	.	.	.	.	.	.	.	100	97.07	.	100	87.03	100	100	100	100	.	.	100	100	.	.	.	.	.	.	.	.	.	.	.	.
11657_8#70.unscaffolded_contigs_velvet.fa.tab	18	.	100	100	99.79	99.86	99.86	100	.	.	.	.	.	.	.	.	100	97.07	100	99.93	86.71	100	100	100	100	.	.	100	100	95.43	.	.	.	.	.	.	.	.	.	.	.
11657_8#72.unscaffolded_contigs_velvet.fa.tab	15	.	100	.	99.79	99.86	99.86	100	.	.	.	.	.	.	.	.	100	97.07	.	100	87.03	100	100	100	100	.	.	100	100	.	.	.	.	.	.	.	.	.	.	.	.
11658_8#3.unscaffolded_contigs_velvet.fa.tab	16	.	100	99.77	100	100	.	.	.	.	.	.	.	.	.	.	100	97.07	.	100	87.03	.	100	100	99.95	.	.	100	100	99.46	97.77	.	.	.	.	.	.	.	.	.	100
11658_8#6.unscaffolded_contigs_velvet.fa.tab	14	.	.	.	99.79	99.86	99.86	100	.	.	.	.	.	.	.	.	100	97.07	.	100	87.03	100	100	100	100	.	.	100	100	.	.	.	.	.	.	.	.	.	.	.	.
11679_1#10.unscaffolded_contigs_velvet.fa.tab	15	.	100	.	99.79	100	.	.	.	.	.	.	.	.	.	.	100	97.07	.	100	86.71	100	100	100	99.31	.	.	100	100	95.54	82.05	.	.	.	.	.	.	.	.	.	.
11822_1#30.unscaffolded_contigs_velvet.fa.tab	15	.	100	.	99.79	99.86	99.86	100	.	.	.	.	.	.	.	.	100	97.07	.	100	87.03	100	100	100	100	.	.	100	100	.	.	.	.	.	.	.	.	.	.	.	.
14673_1#4.unscaffolded_contigs_velvet.fa.tab	16	.	100	99.77	100	100	.	.	.	.	.	.	.	.	.	.	100	97.07	.	100	87.03	.	100	100	99.95	.	.	100	100	99.46	97.77	.	.	.	.	.	.	.	.	.	100
14673_1#73.unscaffolded_contigs_velvet.fa.tab	16	.	100	99.77	100	100	.	.	.	.	.	.	.	.	.	.	100	97.07	.	100	87.03	.	100	100	99.95	.	.	100	100	91.88	97.77	.	.	.	.	.	.	.	.	.	100
14673_1#9.unscaffolded_contigs_velvet.fa.tab	14	.	.	.	99.79	99.86	99.86	100	.	.	.	.	.	.	.	.	100	97.07	.	100	87.03	100	100	100	100	.	.	100	100	.	.	.	.	.	.	.	.	.	.	.	.
14673_4#35.unscaffolded_contigs_velvet.fa.tab	16	.	100	99.77	100	100	.	.	.	.	.	.	.	.	.	.	100	97.07	.	100	87.03	.	100	100	99.95	.	.	100	100	99.46	97.77	.	.	.	.	.	.	.	.	.	100
15608_2#11.unscaffolded_contigs_velvet.fa.tab	18	.	100	100	99.79	99.86	99.86	100	.	.	.	.	.	.	.	.	100	97.07	.	99.93	86.71	100	100	100	100	.	.	100	100	95.43	99	.	.	.	.	.	.	.	.	.	.
15608_2#13.unscaffolded_contigs_velvet.fa.tab	17	.	100	100	99.79	99.86	99.86	100	.	.	.	.	.	.	.	.	100	97.07	.	99.93	86.71	100	100	100	100	.	.	100	100	95.43	.	.	.	.	.	.	.	.	.	.	.
15608_2#37.unscaffolded_contigs_velvet.fa.tab	17	.	100	99.77	100	100	.	.	.	.	.	.	.	.	.	.	100	97.07	.	100	87.03	100	100	100	99.95	.	.	100	100	99.46	97.77	.	.	.	.	.	.	.	.	.	100
15608_2#40.unscaffolded_contigs_velvet.fa.tab	17	.	100	100	99.79	99.86	99.86	100	.	.	.	.	.	.	.	.	100	97.07	.	99.93	86.71	100	100	100	100	.	.	100	100	95.43	.	.	.	.	.	.	.	.	.	.	.
11657_8#62.unscaffolded_contigs_velvet.fa.tab	22	.	100	100	99.79	99.86	99.86	99.56	.	.	.	.	.	.	.	.	100	97.18	.	100	87.03	100	100	100	100	100	100	100	100	.	98.81	.	.	.	100	.	.	.	100	94.03	.
15608_2#30.unscaffolded_contigs_velvet.fa.tab	16	.	100	.	99.79	99.86	99.86	100	.	.	.	.	.	.	.	.	100	97.18	100	100	87.03	100	100	100	100	.	.	100	100	.	.	.	.	.	.	.	.	.	.	.	.
14673_1#79.unscaffolded_contigs_velvet.fa.tab	15	.	100	100	99.79	100	.	.	.	.	.	.	.	.	.	.	100	97.6	.	100	87.03	100	100	100	100	.	.	100	100	.	.	.	.	.	.	.	.	.	.	.	100
11657_1#70.unscaffolded_contigs_velvet.fa.tab	20	.	100	.	99.79	100	.	.	.	.	.	.	.	.	.	.	100	97.7	.	100	87.03	100	100	100	100	.	.	100	100	.	88.32	100	100	100	.	100	100	100	.	.	.
11826_1#46.unscaffolded_contigs_velvet.fa.tab	21	.	100	.	99.79	100	.	.	.	.	.	.	.	.	.	.	100	97.7	.	100	87.03	100	100	100	100	.	.	100	100	.	86.89	100	100	100	.	100	100	100	.	.	100
14673_1#1.unscaffolded_contigs_velvet.fa.tab	22	.	100	.	99.79	100	99.86	100	.	.	.	.	.	.	.	.	100	97.7	.	100	87.03	100	100	100	100	.	.	100	100	.	82.38	100	100	100	.	100	100	100	.	.	.
9950_2#66.unscaffolded_contigs_velvet.fa.tab	17	.	.	.	99.79	100	.	.	.	.	.	.	.	.	.	.	100	97.7	.	100	87.03	100	100	100	100	.	.	100	100	.	.	100	.	100	.	100	100	100	.	.	.
11511_7#13.unscaffolded_contigs_velvet.fa.tab	25	.	100	.	99.79	100	99.86	100	.	.	.	.	.	.	.	.	100	100	.	99.93	87.03	100	100	100	.	100	100	100	100	.	.	100	100	100	100	100	100	100	100	100	.
11511_7#19.unscaffolded_contigs_velvet.fa.tab	15	.	100	.	99.79	99.86	99.86	100	.	.	.	.	.	.	.	.	100	100	.	100	87.03	100	100	100	100	.	.	100	100	.	.	.	.	.	.	.	.	.	.	.	.
11511_7#22.unscaffolded_contigs_velvet.fa.tab	17	.	100	100	99.79	99.86	99.86	100	.	.	.	.	.	.	.	.	100	100	.	99.93	86.71	100	100	100	100	.	.	100	100	95.43	.	.	.	.	.	.	.	.	.	.	.
11511_7#28.unscaffolded_contigs_velvet.fa.tab	14	.	100	.	99.72	99.86	99.86	100	.	.	.	.	.	.	.	.	100	100	100	100	.	.	100	100	98.75	.	.	100	100	.	.	.	.	.	.	.	.	.	.	.	.
11511_7#49.unscaffolded_contigs_velvet.fa.tab	18	.	100	99.77	99.72	99.86	99.86	100	.	.	.	.	.	.	.	.	100	100	.	100	87.03	100	100	99.42	99.95	.	.	100	100	99.46	.	.	.	.	.	.	.	.	.	.	100
11511_7#5.unscaffolded_contigs_velvet.fa.tab	33	.	100	100	100	100	100	100	100	100	100	100	100	100	100	100	100	100	100	99.93	87.03	100	100	99.79	100	.	.	100	100	.	87.04	100	100	100	.	100	100	100	.	.	100
11511_7#54.unscaffolded_contigs_velvet.fa.tab	22	.	100	100	99.65	99.86	99.86	96.05	.	.	.	.	.	.	.	.	100	100	.	100	87.03	100	100	100	100	100	100	100	100	96.83	.	.	.	.	100	.	.	.	99.9	87.26	.
11511_7#57.unscaffolded_contigs_velvet.fa.tab	13	.	100	.	99.79	100	.	.	.	.	.	.	.	.	.	.	100	100	100	100	87.03	.	100	99.79	98.75	.	.	100	100	.	.	.	.	.	.	.	.	.	.	.	.
11511_7#63.unscaffolded_contigs_velvet.fa.tab	18	.	100	100	99.79	99.86	100	100	.	.	.	.	.	.	.	.	100	100	100	100	87.03	100	100	100	100	.	.	100	100	93.87	.	.	.	.	.	.	.	.	.	.	.
11511_7#67.unscaffolded_contigs_velvet.fa.tab	33	93.18	100	100	100	100	100	100	100	100	100	100	100	100	100	100	100	100	100	100	87.03	100	100	100	100	.	.	100	100	.	.	100	100	100	.	100	100	100	.	.	100
11511_7#81.unscaffolded_contigs_velvet.fa.tab	34	91.79	100	100	100	100	100	100	100	100	100	100	100	100	100	100	100	100	100	99.93	87.03	100	100	100	100	.	.	100	100	100	.	100	100	100	.	100	100	100	.	.	100
11511_7#85.unscaffolded_contigs_velvet.fa.tab	34	89.24	100	100	100	100	100	100	100	100	100	100	100	100	100	100	100	100	100	100	87.03	100	100	100	100	.	.	100	100	100	.	100	100	100	.	100	100	100	.	.	100
11511_7#9.unscaffolded_contigs_velvet.fa.tab	21	.	100	100	99.65	99.86	99.86	96.05	.	.	.	.	.	.	.	.	100	100	.	100	87.03	100	100	100	100	100	100	100	100	.	.	.	.	.	100	.	.	.	100	87.26	.
11511_8#23.unscaffolded_contigs_velvet.fa.tab	21	.	100	.	99.79	100	99.71	.	94.34	.	.	.	99.91	100	100	100	100	100	100	100	87.03	100	100	100	100	.	.	100	100	.	98.34	.	.	.	.	.	.	.	.	.	.
11511_8#27.unscaffolded_contigs_velvet.fa.tab	15	.	100	100	99.79	100	.	.	.	.	.	.	.	.	.	.	100	100	100	100	87.03	100	100	100	100	.	.	100	100	.	.	.	.	.	.	.	.	.	.	.	.
11511_8#29.unscaffolded_contigs_velvet.fa.tab	14	.	100	100	99.79	100	.	.	.	.	.	.	.	.	.	.	100	100	.	100	87.03	100	100	99.68	100	.	.	100	100	.	.	.	.	.	.	.	.	.	.	.	.
11511_8#34.unscaffolded_contigs_velvet.fa.tab	17	.	100	99.77	100	100	.	.	.	.	.	.	.	.	.	.	100	100	.	100	87.03	100	100	100	99.95	.	.	100	100	99.46	97.77	.	.	.	.	.	.	.	.	.	81.74
11511_8#62.unscaffolded_contigs_velvet.fa.tab	21	.	100	.	99.79	99.86	99.86	100	.	.	.	.	.	.	.	.	100	100	.	100	87.03	100	100	100	100	100	100	99.58	100	.	96.2	.	.	.	100	.	.	.	100	94.03	.
11511_8#63.unscaffolded_contigs_velvet.fa.tab	15	.	100	99.88	100	100	.	.	.	.	.	.	.	.	.	.	100	100	.	100	87.03	100	100	100	99.95	.	.	100	100	93.87	.	.	.	.	.	.	.	.	.	.	.
11511_8#9.unscaffolded_contigs_velvet.fa.tab	23	.	100	.	99.79	100	.	.	.	.	.	.	.	.	.	.	100	100	.	100	87.03	100	100	100	.	100	100	100	100	.	.	100	100	100	100	100	100	100	100	100	.
11657_1#77.unscaffolded_contigs_velvet.fa.tab	15	.	.	100	99.79	99.86	100	100	.	.	.	.	.	.	.	.	100	100	100	100	87.03	.	100	100	99.95	.	.	100	100	.	.	.	.	.	.	.	.	.	.	.	.
11657_1#78.unscaffolded_contigs_velvet.fa.tab	16	.	100	100	99.86	99.86	99.86	100	.	.	.	.	.	.	.	.	100	100	.	99.93	86.71	100	100	99.79	100	.	.	100	100	.	.	.	.	.	.	.	.	.	.	.	.
11657_1#83.unscaffolded_contigs_velvet.fa.tab	34	91.79	100	100	100	100	100	100	100	100	100	100	100	100	100	100	100	100	100	99.93	87.03	100	100	100	100	.	.	100	100	100	.	100	100	100	.	100	100	100	.	.	100
11657_2#1.unscaffolded_contigs_velvet.fa.tab	17	.	100	100	99.79	99.86	99.86	100	.	.	.	.	.	.	.	.	100	100	.	99.93	86.71	100	100	100	100	.	.	100	100	95.43	.	.	.	.	.	.	.	.	.	.	.
11657_2#20.unscaffolded_contigs_velvet.fa.tab	15	.	100	100	99.79	100	.	.	.	.	.	.	.	.	.	.	100	100	100	99.93	86.71	100	100	99.79	99.95	.	.	100	100	.	.	.	.	.	.	.	.	.	.	.	.
11657_2#21.unscaffolded_contigs_velvet.fa.tab	15	.	100	100	99.79	100	.	.	.	.	.	.	.	.	.	.	100	100	100	99.93	86.71	100	100	99.79	100	.	.	100	100	.	.	.	.	.	.	.	.	.	.	.	.
11657_2#24.unscaffolded_contigs_velvet.fa.tab	25	.	100	.	99.79	100	99.86	100	.	.	.	.	.	.	.	.	100	100	.	100	87.03	100	100	100	.	100	100	100	100	.	.	100	100	100	100	100	100	100	100	100	.
11657_2#25.unscaffolded_contigs_velvet.fa.tab	21	.	100	.	99.79	100	99.71	.	94.34	.	.	.	99.91	100	100	100	100	100	100	100	87.03	100	100	100	100	.	.	100	100	.	80.44	.	.	.	.	.	.	.	.	.	.
11657_2#28.unscaffolded_contigs_velvet.fa.tab	13	.	.	99.77	99.79	100	.	.	.	.	.	.	.	.	.	.	100	100	.	99.93	87.03	.	100	100	100	.	.	99.58	100	.	88.13	.	.	.	.	.	.	.	.	.	.
11657_2#4.unscaffolded_contigs_velvet.fa.tab	21	.	100	.	99.79	100	99.71	.	94.34	.	.	.	99.91	100	100	100	100	100	100	100	87.03	100	100	100	100	.	.	100	100	.	95.39	.	.	.	.	.	.	.	.	.	.
11657_2#5.unscaffolded_contigs_velvet.fa.tab	12	.	.	100	.	100	.	.	.	.	.	.	.	.	.	.	100	100	97.17	100	87.03	100	.	100	100	.	.	100	100	.	.	.	.	.	.	.	.	.	.	.	.
11657_4#14.unscaffolded_contigs_velvet.fa.tab	21	.	100	100	99.65	99.86	99.86	96.05	.	.	.	.	.	.	.	.	100	100	.	100	87.03	100	100	100	100	100	100	100	100	.	.	.	.	.	100	.	.	.	100	87.26	.
11657_4#27.unscaffolded_contigs_velvet.fa.tab	24	.	100	.	99.79	100	.	.	.	.	.	.	.	.	.	.	100	100	.	100	87.03	100	100	100	.	100	100	100	100	.	87.08	100	100	100	100	100	100	100	100	100	.
11657_4#4.unscaffolded_contigs_velvet.fa.tab	18	.	100	.	99.79	99.86	99.86	100	.	.	.	.	.	.	.	.	100	100	.	100	87.03	100	100	100	100	.	91.38	99.58	100	.	.	.	.	.	.	.	.	.	100	94.03	.
11657_4#44.unscaffolded_contigs_velvet.fa.tab	17	.	100	100	99.79	99.86	100	100	.	.	.	.	.	.	.	.	100	100	100	100	87.03	100	100	100	100	.	.	100	100	.	.	.	.	.	.	.	.	.	.	.	.
11657_4#53.unscaffolded_contigs_velvet.fa.tab	23	.	100	.	99.79	100	.	.	.	.	.	.	.	.	.	.	100	100	.	100	87.03	100	100	100	.	100	100	100	100	.	.	100	100	100	100	100	100	100	100	100	.
11657_4#59.unscaffolded_contigs_velvet.fa.tab	22	.	100	.	99.79	99.86	99.86	100	.	.	.	.	.	.	.	.	100	100	.	100	87.03	100	100	100	100	100	100	99.58	100	98.7	96.2	.	.	.	100	.	.	.	100	94.03	.
11657_8#13.unscaffolded_contigs_velvet.fa.tab	22	.	100	.	99.79	100	.	.	.	.	.	.	.	.	.	.	100	100	.	100	87.03	100	100	100	.	100	100	100	100	.	.	100	100	100	.	100	100	100	100	100	.
11657_8#17.unscaffolded_contigs_velvet.fa.tab	14	.	100	.	99.79	100	.	.	.	.	.	.	.	.	.	.	100	100	100	100	86.71	100	100	100	100	.	.	100	100	.	.	.	.	.	.	.	.	.	.	.	.
11657_8#20.unscaffolded_contigs_velvet.fa.tab	20	.	100	99.77	99.79	100	.	.	.	.	.	.	.	.	.	.	100	100	.	99.93	87.03	100	100	100	100	.	.	100	100	.	.	100	100	100	.	100	100	100	.	.	.
11657_8#4.unscaffolded_contigs_velvet.fa.tab	24	.	100	.	99.79	100	.	.	.	.	.	.	.	.	.	.	100	100	.	100	87.03	100	100	100	.	100	100	100	100	.	87.08	100	100	100	100	100	100	100	100	100	.
11657_8#69.unscaffolded_contigs_velvet.fa.tab	17	.	100	100	99.79	99.86	99.86	100	.	.	.	.	.	.	.	.	100	100	.	99.93	86.71	100	100	100	99.95	.	.	100	100	95.43	.	.	.	.	.	.	.	.	.	.	.
11658_1#13.unscaffolded_contigs_velvet.fa.tab	20	.	100	.	99.79	100	.	.	.	.	.	.	.	.	.	.	100	100	100	100	86.71	100	100	100	100	.	.	100	100	.	97.1	100	.	100	.	100	100	100	.	.	.
11658_1#9.unscaffolded_contigs_velvet.fa.tab	34	100	100	100	100	100	100	100	100	100	100	100	100	100	100	100	100	100	100	99.93	87.03	100	100	100	100	.	.	100	100	100	.	100	100	100	.	100	100	100	.	.	100
11658_2#49.unscaffolded_contigs_velvet.fa.tab	16	.	100	.	99.79	100	.	.	.	.	.	.	.	.	.	.	100	100	100	100	86.71	100	100	100	100	.	.	100	100	96.67	84.9	.	.	.	.	.	.	.	.	.	.
11658_2#54.unscaffolded_contigs_velvet.fa.tab	15	.	100	100	99.79	100	.	.	.	.	.	.	.	.	.	.	100	100	100	100	86.71	100	100	99.68	100	.	.	100	100	.	.	.	.	.	.	.	.	.	.	.	.
11658_2#57.unscaffolded_contigs_velvet.fa.tab	18	.	100	99.77	99.79	100	99.86	100	.	.	.	.	.	.	.	.	100	100	100	100	87.03	100	100	100	100	.	.	100	100	.	99.29	.	.	.	.	.	.	.	.	.	.
11658_2#58.unscaffolded_contigs_velvet.fa.tab	21	.	100	100	99.65	99.86	99.86	96.05	.	.	.	.	.	.	.	.	100	100	.	100	87.03	100	100	100	100	100	100	100	100	.	.	.	.	.	100	.	.	.	100	87.26	.
11658_2#62.unscaffolded_contigs_velvet.fa.tab	15	.	100	100	99.79	100	.	.	.	.	.	.	.	.	.	.	100	100	100	100	87.03	100	100	100	100	.	.	100	100	.	.	.	.	.	.	.	.	.	.	.	.
11658_2#75.unscaffolded_contigs_velvet.fa.tab	26	.	100	.	99.79	99.86	99.86	99.56	.	.	.	.	.	.	.	.	100	100	.	100	87.03	100	100	100	.	100	100	100	100	.	87.08	100	100	100	100	100	100	100	100	100	.
11658_2#93.unscaffolded_contigs_velvet.fa.tab	15	.	100	.	99.79	100	.	.	.	.	.	.	.	.	.	.	100	100	.	100	87.03	100	100	99.79	100	.	.	100	100	98.17	99.15	.	.	.	.	.	.	.	.	.	.
11658_2#95.unscaffolded_contigs_velvet.fa.tab	21	.	100	.	99.79	100	99.71	.	94.34	.	.	.	99.91	100	100	100	100	100	100	100	87.03	100	100	100	100	.	.	100	100	.	98.43	.	.	.	.	.	.	.	.	.	.
11658_8#15.unscaffolded_contigs_velvet.fa.tab	18	.	100	100	99.79	99.86	99.86	100	.	.	.	.	.	.	.	.	100	100	100	99.93	86.71	100	100	100	100	.	.	100	100	95.43	.	.	.	.	.	.	.	.	.	.	.
11679_1#19.unscaffolded_contigs_velvet.fa.tab	12	.	.	99.88	.	.	.	.	.	.	.	.	.	.	.	.	100	100	100	99.93	87.03	.	100	100	100	.	.	100	100	.	98.15	.	.	.	.	.	.	.	.	.	.
11679_1#27.unscaffolded_contigs_velvet.fa.tab	23	.	100	.	99.79	100	.	.	.	.	.	.	.	.	.	.	100	100	.	100	87.03	100	100	100	.	100	100	100	100	.	.	100	100	100	100	100	100	100	100	100	.
11791_1#19.unscaffolded_contigs_velvet.fa.tab	14	.	100	.	99.79	100	.	.	.	.	.	.	.	.	.	.	100	100	100	100	87.03	100	100	100	100	.	.	99.58	100	.	.	.	.	.	.	.	.	.	.	.	.
11791_1#5.unscaffolded_contigs_velvet.fa.tab	11	.	.	.	83.54	.	99.86	.	.	.	.	.	.	.	.	.	100	100	.	.	100	100	100	99.79	100	.	.	100	100	.	.	.	.	.	.	.	.	.	.	.	.
11791_1#6.unscaffolded_contigs_velvet.fa.tab	17	.	100	100	99.79	99.86	99.86	99.56	.	.	.	.	.	.	.	.	100	100	.	99.93	87.03	100	100	100	100	.	.	100	100	.	85.94	.	.	.	.	.	.	.	.	.	.
11822_1#13.unscaffolded_contigs_velvet.fa.tab	16	.	.	100	99.79	99.86	99.86	100	.	.	.	.	.	.	.	.	100	100	.	99.93	86.71	100	100	100	100	.	.	100	100	95.43	.	.	.	.	.	.	.	.	.	.	.
11822_1#2.unscaffolded_contigs_velvet.fa.tab	12	.	.	.	83.54	.	99.86	.	.	.	.	.	.	.	.	.	100	100	100	.	100	100	100	99.79	100	.	.	100	100	.	.	.	.	.	.	.	.	.	.	.	.
11822_1#29.unscaffolded_contigs_velvet.fa.tab	20	.	100	.	99.79	100	99.71	.	94.34	.	.	.	99.91	100	100	100	100	100	100	100	87.03	100	100	100	.	.	.	100	100	.	98.34	.	.	.	.	.	.	.	.	.	.
11822_1#35.unscaffolded_contigs_velvet.fa.tab	17	.	100	99.77	100	100	.	.	.	.	.	.	.	.	.	.	.	100	.	99.93	87.03	.	100	100	100	.	.	100	100	91.18	.	.	.	100	.	100	100	100	.	.	.
11822_1#39.unscaffolded_contigs_velvet.fa.tab	17	.	100	100	99.79	99.86	99.86	100	.	.	.	.	.	.	.	.	100	100	.	99.93	86.71	100	100	100	100	.	.	100	100	95.43	.	.	.	.	.	.	.	.	.	.	.
11822_1#50.unscaffolded_contigs_velvet.fa.tab	22	88.09	100	.	99.79	99.86	99.86	100	.	.	.	.	.	.	.	.	100	100	100	100	86.71	100	100	100	100	.	.	100	100	.	.	100	.	100	.	100	100	100	.	.	.
11822_1#51.unscaffolded_contigs_velvet.fa.tab	16	.	.	100	99.79	99.86	99.86	100	.	.	.	.	.	.	.	.	100	100	.	99.93	86.71	100	100	100	100	.	.	100	100	95.43	.	.	.	.	.	.	.	.	.	.	.
11822_1#54.unscaffolded_contigs_velvet.fa.tab	21	.	100	.	99.79	99.86	99.86	100	.	.	.	.	.	.	.	.	100	100	.	100	87.03	100	100	100	100	100	100	99.58	100	97.63	.	.	.	.	100	.	.	.	100	94.03	.
11822_1#61.unscaffolded_contigs_velvet.fa.tab	14	.	100	100	99.79	100	.	.	.	.	.	.	.	.	.	.	100	100	.	100	87.03	100	100	100	100	.	.	100	100	.	.	.	.	.	.	.	.	.	.	.	.
11822_1#65.unscaffolded_contigs_velvet.fa.tab	18	.	100	99.77	99.79	100	99.86	100	.	.	.	.	.	.	.	.	100	100	100	100	87.03	100	100	100	100	.	.	100	100	.	99.29	.	.	.	.	.	.	.	.	.	.
11822_1#77.unscaffolded_contigs_velvet.fa.tab	14	.	100	100	99.79	100	.	.	.	.	.	.	.	.	.	.	100	100	.	100	87.03	100	100	99.68	100	.	.	100	100	.	.	.	.	.	.	.	.	.	.	.	.
11822_1#78.unscaffolded_contigs_velvet.fa.tab	20	.	100	.	99.79	100	99.86	100	.	.	.	.	.	.	.	.	99.53	100	.	100	87.03	100	100	100	.	.	.	100	100	.	.	100	100	100	.	100	100	100	.	.	.
11826_1#13.unscaffolded_contigs_velvet.fa.tab	17	.	100	100	99.72	99.86	99.86	100	.	.	.	.	.	.	.	.	100	100	100	100	87.03	100	100	99.79	100	.	.	100	100	.	.	.	.	.	.	.	.	.	.	.	.
11826_1#19.unscaffolded_contigs_velvet.fa.tab	14	.	.	.	99.79	99.86	99.86	100	.	.	.	.	.	.	.	.	100	100	.	100	87.03	100	100	100	100	.	.	100	100	.	.	.	.	.	.	.	.	.	.	.	.
11826_1#23.unscaffolded_contigs_velvet.fa.tab	14	.	100	.	100	100	.	.	.	.	.	.	.	.	.	.	100	100	100	99.93	87.03	.	100	100	100	.	.	100	100	.	88.18	.	.	.	.	.	.	.	.	.	.
11826_1#24.unscaffolded_contigs_velvet.fa.tab	21	.	100	.	99.79	100	99.71	.	94.34	.	.	.	99.91	100	100	100	100	100	100	100	87.03	100	100	100	100	.	.	100	100	.	98.34	.	.	.	.	.	.	.	.	.	.
11826_1#3.unscaffolded_contigs_velvet.fa.tab	34	89.24	100	100	100	100	100	100	100	100	100	100	100	100	100	100	100	100	100	100	87.03	100	100	100	100	.	.	100	100	100	.	100	100	100	.	100	100	100	.	.	100
11826_1#39.unscaffolded_contigs_velvet.fa.tab	17	.	100	.	99.79	100	.	.	.	.	.	.	.	.	.	.	100	100	100	100	87.03	100	100	99.84	99.95	.	.	100	100	90.25	99	.	.	.	.	.	.	.	.	.	100
11826_1#58.unscaffolded_contigs_velvet.fa.tab	18	.	100	99.77	99.79	100	99.86	100	.	.	.	.	.	.	.	.	100	100	100	100	87.03	100	100	100	100	.	.	100	100	.	99.29	.	.	.	.	.	.	.	.	.	.
11826_1#71.unscaffolded_contigs_velvet.fa.tab	11	.	.	99.88	.	.	.	.	.	.	.	.	.	.	.	.	100	100	100	99.93	87.03	.	100	100	100	.	.	100	100	.	.	.	.	.	.	.	.	.	.	.	.
11826_1#74.unscaffolded_contigs_velvet.fa.tab	21	.	100	100	99.65	99.86	99.86	96.05	.	.	.	.	.	.	.	.	100	100	.	100	87.03	100	100	100	100	100	100	100	100	.	.	.	.	.	100	.	.	.	100	87.26	.
11826_1#78.unscaffolded_contigs_velvet.fa.tab	33	.	100	100	100	100	100	100	100	100	100	100	100	100	100	100	100	100	100	100	87.03	100	100	100	100	.	.	100	100	94.62	85	100	100	100	.	100	100	100	.	.	.
11893_8#1.unscaffolded_contigs_velvet.fa.tab	16	.	.	100	99.79	99.86	99.86	100	.	.	.	.	.	.	.	.	100	100	.	99.93	86.71	100	100	100	100	.	.	100	100	95.43	.	.	.	.	.	.	.	.	.	.	.
11893_8#12.unscaffolded_contigs_velvet.fa.tab	17	.	100	.	99.79	100	99.86	100	.	.	.	.	.	.	.	.	100	100	100	100	87.03	100	100	100	100	.	.	100	100	.	98.58	.	.	.	.	.	.	.	.	.	.
11893_8#15.unscaffolded_contigs_velvet.fa.tab	23	.	.	.	99.79	100	.	.	.	.	.	.	.	.	.	.	100	100	.	100	87.03	100	100	100	.	100	100	100	100	.	87.08	100	100	100	100	100	100	100	100	100	.
11893_8#3.unscaffolded_contigs_velvet.fa.tab	17	.	.	100	99.79	99.86	99.86	100	.	.	.	.	.	.	.	.	100	100	100	100	87.03	100	100	100	100	.	.	100	100	.	98.43	.	.	.	.	.	.	.	.	.	.
11893_8#9.unscaffolded_contigs_velvet.fa.tab	18	.	100	99.77	100	100	.	.	.	.	.	.	.	.	.	.	100	100	.	99.93	87.03	.	100	100	100	.	.	100	100	89.62	.	.	.	100	.	100	100	100	.	.	.
12291_5#28.unscaffolded_contigs_velvet.fa.tab	16	91.35	100	100	100	100	.	.	.	.	.	.	.	.	.	.	100	100	100	100	87.03	100	100	100	100	.	.	100	100	.	.	.	.	.	.	.	.	.	.	.	.
12291_5#35.unscaffolded_contigs_velvet.fa.tab	13	.	.	.	83.54	.	99.86	.	.	.	.	.	.	.	.	.	100	100	100	.	100	100	100	99.79	100	.	.	100	100	96.51	.	.	.	.	.	.	.	.	.	.	.
12291_5#40.unscaffolded_contigs_velvet.fa.tab	17	.	100	99.77	99.79	99.86	99.86	100	.	.	.	.	.	.	.	.	100	100	.	100	87.03	100	100	100	100	.	.	100	100	98.49	.	.	.	.	.	.	.	.	.	.	.
14673_1#12.unscaffolded_contigs_velvet.fa.tab	15	.	100	100	99.79	100	.	.	.	.	.	.	.	.	.	.	100	100	100	100	87.03	100	100	100	100	.	.	100	100	.	.	.	.	.	.	.	.	.	.	.	.
14673_1#14.unscaffolded_contigs_velvet.fa.tab	14	.	100	100	99.79	100	.	.	.	.	.	.	.	.	.	.	100	100	.	100	87.03	100	100	99.68	100	.	.	100	100	.	.	.	.	.	.	.	.	.	.	.	.
14673_1#18.unscaffolded_contigs_velvet.fa.tab	20	.	100	.	99.79	100	99.71	.	94.34	.	.	.	99.91	100	100	100	100	100	.	100	87.03	100	100	100	100	.	.	100	100	.	98.34	.	.	.	.	.	.	.	.	.	.
14673_1#23.unscaffolded_contigs_velvet.fa.tab	15	.	100	.	99.79	99.86	99.86	100	.	.	.	.	.	.	.	.	100	100	.	100	87.03	100	100	100	100	.	.	100	100	.	.	.	.	.	.	.	.	.	.	.	.
14673_1#36.unscaffolded_contigs_velvet.fa.tab	16	.	100	99.77	99.79	100	.	.	.	.	.	.	.	.	.	.	100	100	100	100	87.03	100	100	100	100	.	.	100	100	.	99.29	.	.	.	.	.	.	.	.	.	.
14673_1#37.unscaffolded_contigs_velvet.fa.tab	22	.	100	100	99.79	99.86	99.86	99.56	.	.	.	.	.	.	.	.	100	100	.	100	87.03	100	100	100	100	100	100	100	100	.	97.82	.	.	.	100	.	.	.	100	94.03	.
14673_1#40.unscaffolded_contigs_velvet.fa.tab	21	.	100	.	99.79	99.86	99.86	100	.	.	.	.	.	.	.	.	100	100	.	100	87.03	100	100	100	88.94	100	100	99.58	100	.	96.2	.	.	.	100	.	.	.	100	94.03	.
14673_1#42.unscaffolded_contigs_velvet.fa.tab	18	.	100	99.77	99.79	100	99.86	100	.	.	.	.	.	.	.	.	100	100	100	100	87.03	100	100	100	100	.	.	100	100	.	99.29	.	.	.	.	.	.	.	.	.	.
14673_1#43.unscaffolded_contigs_velvet.fa.tab	15	.	100	.	99.79	100	.	.	.	.	.	.	.	.	.	.	100	100	100	100	86.71	100	100	100	100	.	.	100	100	.	82.05	.	.	.	.	.	.	.	.	.	.
14673_1#52.unscaffolded_contigs_velvet.fa.tab	24	.	100	.	99.79	100	.	.	.	.	.	.	.	.	.	.	100	100	.	100	87.03	100	100	100	.	100	100	100	100	.	87.08	100	100	100	100	100	100	100	100	100	.
14673_1#54.unscaffolded_contigs_velvet.fa.tab	15	.	100	.	99.79	100	99.86	100	.	.	.	.	.	.	.	.	100	100	.	100	87.03	.	100	100	98.75	.	.	100	100	.	84.95	.	.	.	.	.	.	.	.	.	.
14673_1#55.unscaffolded_contigs_velvet.fa.tab	16	.	100	.	99.79	100	.	.	.	.	.	.	.	.	.	.	100	100	100	100	86.71	100	100	100	100	.	.	100	100	96.67	84.9	.	.	.	.	.	.	.	.	.	.
14673_1#56.unscaffolded_contigs_velvet.fa.tab	14	.	100	.	83.54	.	99.86	.	.	.	.	.	.	.	.	.	100	100	100	99.07	87.03	.	100	100	100	.	.	100	100	95.75	.	.	.	.	.	.	.	.	.	.	.
14673_1#64.unscaffolded_contigs_velvet.fa.tab	15	.	100	99.77	99.79	100	.	.	.	.	.	.	.	.	.	.	100	100	100	100	87.03	100	100	100	100	.	.	100	100	.	.	.	.	.	.	.	.	.	.	.	.
14673_1#65.unscaffolded_contigs_velvet.fa.tab	21	.	100	.	99.79	100	99.71	.	94.34	.	.	.	99.91	100	100	100	100	100	100	99.93	92.82	100	100	99.36	100	.	.	100	100	.	98.58	.	.	.	.	.	.	.	.	.	.
14673_1#67.unscaffolded_contigs_velvet.fa.tab	25	.	100	.	99.79	100	.	.	.	.	.	.	.	.	.	.	100	100	.	100	87.03	100	100	100	.	100	100	100	100	95.11	87.08	100	100	100	100	100	100	100	100	100	.
14673_1#68.unscaffolded_contigs_velvet.fa.tab	16	.	100	99.88	100	100	.	.	.	.	.	.	.	.	.	.	100	100	.	100	87.03	100	100	100	99.95	.	.	100	100	99.3	85.52	.	.	.	.	.	.	.	.	.	.
14673_1#71.unscaffolded_contigs_velvet.fa.tab	22	.	100	.	99.79	100	.	.	.	.	.	.	.	.	.	.	100	100	.	100	87.03	100	100	.	.	100	100	100	100	.	.	100	100	100	100	100	100	100	100	100	.
14673_1#74.unscaffolded_contigs_velvet.fa.tab	13	.	.	99.77	99.79	100	.	.	.	.	.	.	.	.	.	.	100	100	.	99.93	87.03	.	100	100	100	.	.	99.58	100	.	82.05	.	.	.	.	.	.	.	.	.	.
14673_1#77.unscaffolded_contigs_velvet.fa.tab	21	.	100	.	99.79	99.86	99.86	100	.	.	.	.	.	.	.	.	100	100	.	100	87.03	100	100	100	100	100	100	99.58	100	.	96.2	.	.	.	100	.	.	.	100	94.03	.
14673_1#78.unscaffolded_contigs_velvet.fa.tab	21	.	100	.	99.79	99.86	99.86	100	.	.	.	.	.	.	.	.	100	100	.	100	87.03	100	100	100	100	100	100	99.58	100	.	96.2	.	.	.	100	.	.	.	100	94.03	.
14673_1#80.unscaffolded_contigs_velvet.fa.tab	14	.	100	.	100	100	.	.	.	.	.	.	.	.	.	.	100	100	100	99.93	87.03	.	100	100	100	.	.	100	100	.	86.85	.	.	.	.	.	.	.	.	.	.
14673_1#81.unscaffolded_contigs_velvet.fa.tab	23	.	.	.	99.79	100	.	.	.	.	.	.	.	.	.	.	100	100	.	100	87.03	100	100	100	.	100	100	100	100	.	87.08	100	100	100	99.82	100	100	100	100	100	.
14673_1#90.unscaffolded_contigs_velvet.fa.tab	19	.	100	.	100	100	.	.	.	.	.	.	.	.	.	.	100	100	100	100	86.71	100	100	100	100	.	.	100	100	.	.	100	.	100	.	100	100	100	.	.	.
14673_1#91.unscaffolded_contigs_velvet.fa.tab	34	100	100	100	100	100	100	100	100	100	100	100	100	100	100	100	100	100	100	99.93	87.03	100	100	100	100	.	.	100	100	100	.	100	100	100	.	100	100	100	.	.	100
14673_1#95.unscaffolded_contigs_velvet.fa.tab	21	.	100	.	99.79	100	99.71	.	94.34	.	.	.	99.91	100	100	100	100	100	100	100	87.03	100	100	100	100	.	.	100	100	.	98.34	.	.	.	.	.	.	.	.	.	.
14673_2#15.unscaffolded_contigs_velvet.fa.tab	16	.	100	99.77	100	100	.	.	.	.	.	.	.	.	.	.	100	100	.	100	87.03	.	100	100	99.95	.	.	100	100	99.46	97.77	.	.	.	.	.	.	.	.	.	100
14673_2#19.unscaffolded_contigs_velvet.fa.tab	15	.	100	100	99.79	100	.	.	.	.	.	.	.	.	.	.	100	100	100	99.93	86.71	100	100	99.79	100	.	.	100	100	.	.	.	.	.	.	.	.	.	.	.	.
14673_2#25.unscaffolded_contigs_velvet.fa.tab	33	91.79	100	100	100	100	100	100	100	100	100	100	100	100	100	100	100	100	100	100	87.03	100	100	100	100	.	.	100	100	.	.	100	100	100	.	100	100	100	.	.	100
14673_2#26.unscaffolded_contigs_velvet.fa.tab	21	.	100	.	99.79	100	99.86	100	.	.	.	.	.	.	.	.	100	100	.	100	90.89	100	100	100	100	.	.	100	100	88.23	84.24	.	.	100	.	100	100	100	.	.	.
14673_2#27.unscaffolded_contigs_velvet.fa.tab	16	.	100	.	99.79	100	.	.	.	.	.	.	.	.	.	.	100	100	100	100	86.71	100	100	100	100	.	.	100	100	91.88	81.15	.	.	.	.	.	.	.	.	.	.
14673_2#29.unscaffolded_contigs_velvet.fa.tab	24	.	100	.	99.79	100	.	.	.	.	.	.	.	.	.	.	100	100	.	100	87.03	100	100	100	.	100	100	100	100	.	87.08	100	100	100	100	100	100	100	100	100	.
14673_2#31.unscaffolded_contigs_velvet.fa.tab	13	.	100	99.88	.	.	.	.	.	.	.	.	.	.	.	.	100	100	100	99.93	87.03	.	100	100	100	.	.	100	100	.	84.09	.	.	.	.	.	.	.	.	.	.
14673_2#32.unscaffolded_contigs_velvet.fa.tab	15	.	100	.	100	100	.	.	.	.	.	.	.	.	.	.	100	100	.	100	87.03	98.47	100	100	100	.	.	100	100	88.23	97.67	.	.	.	.	.	.	.	.	.	.
14673_2#4.unscaffolded_contigs_velvet.fa.tab	16	.	100	.	99.79	100	.	.	.	.	.	.	.	.	.	.	100	100	100	100	86.71	100	100	100	100	.	.	100	100	96.67	81.15	.	.	.	.	.	.	.	.	.	.
14673_2#40.unscaffolded_contigs_velvet.fa.tab	13	.	100	99.88	.	.	.	.	.	.	.	.	.	.	.	.	100	100	100	99.93	87.03	.	100	100	100	.	.	100	100	.	98.15	.	.	.	.	.	.	.	.	.	.
14673_2#48.unscaffolded_contigs_velvet.fa.tab	16	.	100	99.77	99.65	99.86	100	100	.	.	.	.	.	.	.	.	100	100	.	100	87.03	100	100	100	100	.	.	100	100	.	.	.	.	.	.	.	.	.	.	.	.
14673_2#49.unscaffolded_contigs_velvet.fa.tab	15	.	100	100	99.79	100	.	.	.	.	.	.	.	.	.	.	100	100	100	100	87.03	100	100	100	100	.	.	100	100	.	.	.	.	.	.	.	.	.	.	.	.
14673_2#51.unscaffolded_contigs_velvet.fa.tab	13	.	.	.	99.79	100	.	.	.	.	.	.	.	.	.	.	100	100	100	100	90.89	100	100	99.42	100	.	.	100	100	.	.	.	.	.	.	.	.	.	.	.	.
14673_2#52.unscaffolded_contigs_velvet.fa.tab	21	.	100	.	99.79	100	99.71	.	94.34	.	.	.	99.91	100	100	100	100	100	100	100	87.03	100	100	100	100	.	.	100	100	.	98.2	.	.	.	.	.	.	.	.	.	.
14673_2#67.unscaffolded_contigs_velvet.fa.tab	15	.	100	100	99.79	100	.	.	.	.	.	.	.	.	.	.	100	100	100	99.93	86.71	100	100	99.79	100	.	.	100	100	.	.	.	.	.	.	.	.	.	.	.	.
14673_2#73.unscaffolded_contigs_velvet.fa.tab	16	.	100	.	99.79	100	.	.	.	.	.	.	.	.	.	.	100	100	100	100	87.03	100	100	99.84	99.95	.	.	100	100	.	99	.	.	.	.	.	.	.	.	.	100
14673_2#76.unscaffolded_contigs_velvet.fa.tab	24	.	100	.	99.79	100	.	.	.	.	.	.	.	.	.	.	100	100	.	100	87.03	100	100	100	.	100	100	100	100	.	87.08	100	100	100	100	100	100	100	100	100	.
14673_2#84.unscaffolded_contigs_velvet.fa.tab	16	.	100	.	99.79	100	99.86	100	.	.	.	.	.	.	.	.	93.16	100	100	100	86.71	100	100	100	100	.	.	100	100	.	.	.	.	.	.	.	.	.	.	.	.
14673_2#87.unscaffolded_contigs_velvet.fa.tab	12	.	100	99.88	.	.	.	.	.	.	.	.	.	.	.	.	100	100	100	99.93	87.03	.	100	100	100	.	.	100	100	.	.	.	.	.	.	.	.	.	.	.	.
14673_2#9.unscaffolded_contigs_velvet.fa.tab	19	.	100	99.77	99.79	100	99.57	100	.	.	.	.	.	.	.	.	100	100	100	100	87.03	100	100	100	100	.	.	100	100	88.05	99.29	.	.	.	.	.	.	.	.	.	.
14673_2#91.unscaffolded_contigs_velvet.fa.tab	21	.	100	.	99.79	100	99.71	.	94.34	.	.	.	99.91	100	100	100	100	100	100	100	87.03	100	100	100	100	.	.	100	100	.	98.58	.	.	.	.	.	.	.	.	.	.
14673_3#11.unscaffolded_contigs_velvet.fa.tab	23	91.79	100	100	99.79	100	.	.	.	.	.	.	.	.	.	.	100	100	100	100	87.03	100	100	100	100	.	.	100	100	.	.	100	100	100	.	100	100	100	.	.	100
14673_3#17.unscaffolded_contigs_velvet.fa.tab	33	81.94	100	100	100	100	100	100	100	100	100	100	100	100	100	100	100	100	100	100	87.03	100	100	100	100	.	.	100	100	.	.	100	100	100	.	100	100	100	.	.	100
14673_3#19.unscaffolded_contigs_velvet.fa.tab	33	91.79	100	100	100	100	100	100	100	100	100	100	100	100	100	100	100	100	100	100	87.03	100	100	100	100	.	.	100	100	.	.	100	100	100	.	100	100	100	.	.	100
14673_3#2.unscaffolded_contigs_velvet.fa.tab	22	.	100	.	99.79	99.86	99.86	100	.	.	.	.	.	.	.	.	100	100	.	100	87.03	100	100	100	99.95	100	100	99.58	100	97.63	96.2	.	.	.	100	.	.	.	100	94.03	.
14673_3#20.unscaffolded_contigs_velvet.fa.tab	17	93.18	100	.	99.79	100	99.86	100	.	.	.	.	.	.	.	.	100	100	100	100	86.71	100	100	100	100	.	.	100	100	.	.	.	.	.	.	.	.	.	.	.	.
14673_3#22.unscaffolded_contigs_velvet.fa.tab	21	.	100	100	99.65	99.86	99.86	96.05	.	.	.	.	.	.	.	.	100	100	.	100	87.03	100	100	100	100	100	100	100	100	.	.	.	.	.	100	.	.	.	100	87.26	.
14673_3#34.unscaffolded_contigs_velvet.fa.tab	12	.	100	99.88	.	.	.	.	.	.	.	.	.	.	.	.	100	100	100	99.93	87.03	.	100	100	100	.	.	100	100	.	.	.	.	.	.	.	.	.	.	.	.
14673_3#38.unscaffolded_contigs_velvet.fa.tab	16	.	100	.	99.79	99.86	99.86	100	.	.	.	.	.	.	.	.	100	100	100	99.93	92.82	100	100	.	100	.	.	99.58	100	.	98.15	.	.	.	.	.	.	.	.	.	.
14673_3#42.unscaffolded_contigs_velvet.fa.tab	21	.	100	.	99.79	100	99.71	.	94.34	.	.	.	99.91	100	100	100	100	100	100	100	87.03	100	100	100	100	.	.	100	100	.	98.58	.	.	.	.	.	.	.	.	.	.
14673_3#51.unscaffolded_contigs_velvet.fa.tab	32	.	100	100	100	100	100	100	100	100	100	100	100	100	100	100	100	100	100	99.93	87.03	100	100	100	100	.	.	100	100	.	.	100	100	100	.	100	100	100	.	.	100
14673_3#78.unscaffolded_contigs_velvet.fa.tab	34	88.09	100	100	100	100	100	100	100	100	100	100	100	100	100	100	100	100	100	100	87.03	100	100	100	100	.	.	100	100	100	.	100	100	100	.	100	100	100	.	.	100
14673_3#79.unscaffolded_contigs_velvet.fa.tab	33	86.36	100	100	100	100	100	100	100	100	100	100	100	100	100	100	100	100	100	100	87.03	100	100	100	100	.	.	100	100	.	.	100	100	100	.	100	100	100	.	.	100
14673_3#80.unscaffolded_contigs_velvet.fa.tab	22	.	99.93	.	99.79	99.86	99.86	100	.	.	.	.	.	.	.	.	100	100	.	100	87.03	100	100	100	100	100	100	99.58	100	97.63	85	.	.	.	100	.	.	.	100	94.03	.
14673_3#81.unscaffolded_contigs_velvet.fa.tab	21	.	100	100	99.65	99.86	99.86	96.05	.	.	.	.	.	.	.	.	100	100	.	100	87.03	100	100	100	100	100	100	100	100	.	.	.	.	.	100	.	.	.	100	87.26	.
14673_3#84.unscaffolded_contigs_velvet.fa.tab	16	.	100	.	99.79	100	.	.	.	.	.	.	.	.	.	.	100	100	100	100	86.71	100	100	100	100	.	.	100	100	85.48	84.9	.	.	.	.	.	.	.	.	.	.
14673_4#19.unscaffolded_contigs_velvet.fa.tab	24	.	100	.	99.79	100	.	.	.	.	.	.	.	.	.	.	100	100	.	100	87.03	100	100	100	.	100	100	100	100	.	87.08	100	100	100	100	100	100	100	100	100	.
14673_4#21.unscaffolded_contigs_velvet.fa.tab	15	.	100	.	99.79	100	.	.	.	.	.	.	.	.	.	.	100	100	100	100	86.71	100	100	100	99.95	.	.	100	100	.	82.05	.	.	.	.	.	.	.	.	.	.
14673_4#23.unscaffolded_contigs_velvet.fa.tab	19	.	100	.	100	100	.	.	.	.	.	.	.	.	.	.	100	100	100	100	86.71	100	100	100	100	.	.	100	100	.	.	100	.	100	.	100	100	100	.	.	.
14673_4#25.unscaffolded_contigs_velvet.fa.tab	20	.	100	.	99.79	100	99.86	100	.	.	.	.	.	.	.	.	100	100	100	100	87.03	100	100	99.79	100	.	.	100	100	.	.	.	.	100	.	100	100	100	.	.	.
14673_4#29.unscaffolded_contigs_velvet.fa.tab	15	.	100	.	99.79	100	.	.	.	.	.	.	.	.	.	.	100	100	.	100	87.03	100	100	99.79	100	.	.	100	100	98.17	99.15	.	.	.	.	.	.	.	.	.	.
14673_4#30.unscaffolded_contigs_velvet.fa.tab	24	.	100	.	99.79	100	.	.	.	.	.	.	.	.	.	.	100	100	.	100	87.03	100	100	100	.	100	100	100	100	.	87.08	100	100	100	99.82	100	100	100	100	100	.
14673_4#31.unscaffolded_contigs_velvet.fa.tab	17	.	100	99.77	99.79	100	99.86	100	.	.	.	.	.	.	.	.	100	100	100	99.93	87.03	100	100	100	100	.	.	100	100	.	.	.	.	.	.	.	.	.	.	.	.
14673_4#32.unscaffolded_contigs_velvet.fa.tab	23	.	100	.	99.79	100	.	.	.	.	.	.	.	.	.	.	100	100	.	100	87.03	100	100	100	.	100	100	100	100	.	.	100	100	100	100	100	100	100	100	100	.
14673_4#38.unscaffolded_contigs_velvet.fa.tab	16	.	100	.	99.79	100	.	.	.	.	.	.	.	.	.	.	100	100	100	100	87.03	100	100	99.84	99.95	.	.	100	100	.	97.82	.	.	.	.	.	.	.	.	.	100
14673_4#40.unscaffolded_contigs_velvet.fa.tab	15	.	100	100	99.79	100	.	.	.	.	.	.	.	.	.	.	100	100	.	100	87.03	100	100	100	100	.	.	100	100	.	.	.	.	.	.	.	.	.	.	.	100
14673_4#42.unscaffolded_contigs_velvet.fa.tab	23	.	100	100	99.79	100	.	.	.	.	.	.	.	.	.	.	100	100	100	100	87.03	100	100	100	100	.	.	100	100	.	87.89	100	100	100	.	100	100	100	.	.	100
14673_4#9.unscaffolded_contigs_velvet.fa.tab	14	.	.	.	99.79	100	.	.	.	.	.	.	.	.	.	.	100	100	100	100	86.71	100	100	100	100	.	.	100	100	.	81.15	.	.	.	.	.	.	.	.	.	.
15277_1#21.unscaffolded_contigs_velvet.fa.tab	21	.	100	.	99.79	99.86	99.86	100	.	.	.	.	.	.	.	.	100	100	.	100	87.03	100	100	100	100	100	100	99.58	100	.	96.2	.	.	.	100	.	.	.	100	94.03	.
15277_1#24.unscaffolded_contigs_velvet.fa.tab	13	.	.	.	100	100	.	.	.	.	.	.	.	.	.	.	100	100	100	100	87.03	.	100	100	100	.	.	100	100	95.43	.	.	.	.	.	.	.	.	.	.	.
15277_1#5.unscaffolded_contigs_velvet.fa.tab	21	.	.	100	99.79	99.86	99.86	99.56	.	.	.	.	.	.	.	.	100	100	.	100	87.03	100	100	100	100	100	100	100	100	.	98.81	.	.	.	100	.	.	.	100	94.03	.
15277_1#9.unscaffolded_contigs_velvet.fa.tab	16	.	100	99.77	100	100	.	.	.	.	.	.	.	.	.	.	100	100	.	100	87.03	100	100	99.42	99.95	.	.	100	100	99.46	.	.	.	.	.	.	.	.	.	.	100
15608_2#23.unscaffolded_contigs_velvet.fa.tab	15	.	100	100	99.79	100	.	.	.	.	.	.	.	.	.	.	100	100	100	99.93	86.71	100	100	99.79	100	.	.	100	100	.	.	.	.	.	.	.	.	.	.	.	.
15608_2#32.unscaffolded_contigs_velvet.fa.tab	18	.	100	99.77	100	100	.	.	.	.	.	.	.	.	.	.	100	100	.	99.93	87.03	.	100	100	100	.	.	100	100	95.43	.	.	.	100	.	100	100	100	.	.	.
15608_2#33.unscaffolded_contigs_velvet.fa.tab	14	.	.	.	99.79	99.86	99.86	100	.	.	.	.	.	.	.	.	100	100	.	100	87.03	100	100	100	100	.	.	100	100	.	.	.	.	.	.	.	.	.	.	.	.
15608_2#34.unscaffolded_contigs_velvet.fa.tab	32	100	100	100	100	100	100	100	100	100	100	100	100	100	100	100	100	100	100	100	87.03	100	100	100	100	.	.	100	100	.	.	100	100	100	.	100	100	100	.	.	.
15608_2#36.unscaffolded_contigs_velvet.fa.tab	15	.	.	99.77	99.79	100	.	.	.	.	.	.	.	.	.	.	100	100	100	100	87.03	100	100	100	100	.	.	100	100	.	85.28	.	.	.	.	.	.	.	.	.	.
15608_2#44.unscaffolded_contigs_velvet.fa.tab	23	91.79	100	100	99.79	99.86	99.86	100	.	.	.	.	.	.	.	.	100	100	100	99.93	87.03	100	100	100	88.06	.	.	100	100	.	.	100	.	100	.	100	100	100	.	.	.
15608_2#45.unscaffolded_contigs_velvet.fa.tab	33	88.09	100	100	100	100	100	100	100	100	100	100	100	100	100	100	100	100	100	99.93	87.03	100	100	100	100	.	.	100	100	.	.	100	100	100	.	100	100	100	.	.	100
15608_2#48.unscaffolded_contigs_velvet.fa.tab	17	.	100	99.77	99.79	100	.	.	.	.	.	.	.	.	.	.	100	100	100	100	86.71	100	100	100	99.95	.	.	100	100	95.43	90.17	.	.	.	.	.	.	.	.	.	.
15608_2#5.unscaffolded_contigs_velvet.fa.tab	14	.	.	.	99.79	99.86	99.86	100	.	.	.	.	.	.	.	.	100	100	.	100	87.03	100	100	100	100	.	.	100	100	.	.	.	.	.	.	.	.	.	.	.	.
15608_2#50.unscaffolded_contigs_velvet.fa.tab	26	.	100	.	99.79	100	99.86	100	.	.	.	.	.	.	.	.	100	100	.	100	87.03	100	100	100	.	100	100	100	100	.	84.09	100	100	100	100	100	100	100	100	100	.
15608_2#51.unscaffolded_contigs_velvet.fa.tab	15	.	100	100	99.79	100	.	.	.	.	.	.	.	.	.	.	100	100	100	100	86.71	100	100	99.79	100	.	.	100	100	.	.	.	.	.	.	.	.	.	.	.	.
15608_2#52.unscaffolded_contigs_velvet.fa.tab	13	.	100	99.88	.	.	.	.	.	.	.	.	.	.	.	.	100	100	100	99.93	87.03	.	100	100	100	.	.	100	100	.	94.73	.	.	.	.	.	.	.	.	.	.
15608_2#65.unscaffolded_contigs_velvet.fa.tab	16	.	100	100	100	100	.	.	.	.	.	.	.	.	.	.	100	100	100	99.93	87.03	100	100	99.79	100	.	.	100	100	.	.	.	.	.	.	.	.	.	.	.	100
15608_2#68.unscaffolded_contigs_velvet.fa.tab	13	.	100	.	99.79	100	.	.	.	.	.	.	.	.	.	.	100	100	100	100	87.03	.	100	100	98.75	.	.	100	100	.	.	.	.	.	.	.	.	.	.	.	.
15608_2#69.unscaffolded_contigs_velvet.fa.tab	15	.	100	100	99.79	100	.	.	.	.	.	.	.	.	.	.	100	100	100	99.93	86.71	100	100	99.79	100	.	.	100	100	.	.	.	.	.	.	.	.	.	.	.	.
15608_2#70.unscaffolded_contigs_velvet.fa.tab	15	.	100	100	99.79	100	.	.	.	.	.	.	.	.	.	.	100	100	100	99.93	86.71	100	100	99.79	99.95	.	.	100	100	.	.	.	.	.	.	.	.	.	.	.	.
15608_2#92.unscaffolded_contigs_velvet.fa.tab	33	88.9	100	100	100	100	100	100	100	100	100	100	100	100	100	100	100	100	100	99.93	87.03	100	100	100	100	.	.	100	100	.	.	100	100	100	.	100	100	100	.	.	100
15608_2#94.unscaffolded_contigs_velvet.fa.tab	17	.	100	99.77	99.79	100	.	.	.	.	.	.	.	.	.	.	100	100	100	100	87.03	100	100	100	100	.	.	100	100	89.13	85.47	.	.	.	.	.	.	.	.	.	.
15608_2#95.unscaffolded_contigs_velvet.fa.tab	18	.	100	99.77	100	100	.	.	.	.	.	.	.	.	.	.	.	100	.	100	87.03	.	100	100	100	.	.	100	100	99.52	99.29	.	.	100	.	100	100	100	.	.	.
15608_3#11.unscaffolded_contigs_velvet.fa.tab	16	.	100	.	99.79	100	.	.	.	.	.	.	.	.	.	.	100	100	100	100	87.03	86.87	100	.	99.95	.	.	100	100	90.07	97.82	.	.	.	.	.	.	.	.	.	100
15608_3#13.unscaffolded_contigs_velvet.fa.tab	16	.	.	100	99.79	99.86	100	100	.	.	.	.	.	.	.	.	100	100	100	100	87.03	.	100	100	99.95	.	.	100	100	.	84.95	.	.	.	.	.	.	.	.	.	.
15608_3#16.unscaffolded_contigs_velvet.fa.tab	14	.	.	.	99.79	99.86	99.86	100	.	.	.	.	.	.	.	.	100	100	.	100	87.03	100	100	100	100	.	.	100	100	.	.	.	.	.	.	.	.	.	.	.	.
15608_3#9.unscaffolded_contigs_velvet.fa.tab	20	.	100	.	99.79	100	99.71	.	94.34	.	.	.	99.91	100	100	100	.	100	100	99.93	92.82	100	100	99.36	100	.	.	100	100	.	98.58	.	.	.	.	.	.	.	.	.	.
17966_5#114.unscaffolded_contigs_velvet.fa.tab	16	.	100	.	99.79	100	.	.	.	.	.	.	.	.	.	.	100	100	100	100	86.71	100	100	100	100	.	.	100	100	95.54	82.05	.	.	.	.	.	.	.	.	.	.
19084_8#119.unscaffolded_contigs_velvet.fa.tab	16	.	100	.	99.79	100	.	.	.	.	.	.	.	.	.	.	100	100	.	100	87.03	100	100	99.84	100	.	.	99.58	100	99.46	97.82	.	.	.	.	.	.	.	.	.	100
19084_8#125.unscaffolded_contigs_velvet.fa.tab	34	91.79	100	100	100	100	100	100	100	100	100	100	100	100	100	100	100	100	100	100	87.03	100	100	100	100	.	.	100	100	100	.	100	100	100	.	100	100	100	.	.	100
19084_8#132.unscaffolded_contigs_velvet.fa.tab	15	.	100	100	99.79	100	.	.	.	.	.	.	.	.	.	.	100	100	100	100	87.03	100	100	100	100	.	.	100	100	.	.	.	.	.	.	.	.	.	.	.	.
19084_8#133.unscaffolded_contigs_velvet.fa.tab	16	.	100	99.77	99.79	100	.	.	.	.	.	.	.	.	.	.	100	100	100	99.93	87.03	100	100	100	100	.	.	100	100	98.6	.	.	.	.	.	.	.	.	.	.	.
19084_8#134.unscaffolded_contigs_velvet.fa.tab	16	.	100	99.77	100	100	.	.	.	.	.	.	.	.	.	.	100	100	.	100	87.03	.	100	100	99.95	.	.	100	100	99.46	97.77	.	.	.	.	.	.	.	.	.	100
19084_8#135.unscaffolded_contigs_velvet.fa.tab	24	.	100	.	99.79	100	.	.	.	.	.	.	.	.	.	.	100	100	.	100	87.03	100	100	100	.	100	100	100	100	.	87.08	100	100	100	100	100	100	100	100	100	.
19084_8#146.unscaffolded_contigs_velvet.fa.tab	18	.	100	99.77	100	100	.	.	.	.	.	.	.	.	.	.	100	100	.	100	87.03	.	100	100	100	.	.	100	100	99.46	.	.	.	100	.	100	100	100	.	.	.
19084_8#147.unscaffolded_contigs_velvet.fa.tab	19	.	100	99.77	99.72	99.86	99.86	100	.	.	.	.	.	.	.	.	100	100	.	100	87.03	100	100	99.42	99.95	.	.	100	100	99.46	86.56	.	.	.	.	.	.	.	.	.	100
19084_8#156.unscaffolded_contigs_velvet.fa.tab	21	.	100	.	99.79	100	99.71	.	94.34	.	.	.	99.91	100	100	100	100	100	100	100	87.03	100	100	100	100	.	.	100	100	.	98.34	.	.	.	.	.	.	.	.	.	.
19084_8#158.unscaffolded_contigs_velvet.fa.tab	26	.	100	.	99.79	100	99.86	100	.	.	.	.	.	.	.	.	100	100	.	99.93	87.03	100	100	100	.	100	100	100	100	.	87.08	100	100	100	100	100	100	100	100	100	.
19084_8#183.unscaffolded_contigs_velvet.fa.tab	15	.	100	100	99.79	100	.	.	.	.	.	.	.	.	.	.	99.47	100	100	99.93	87.03	.	100	100	100	.	.	100	100	98.17	.	.	.	.	.	.	.	.	.	.	.
21053_8#25.unscaffolded_contigs_velvet.fa.tab	22	.	100	100	99.79	100	99.71	.	94.34	.	.	.	99.91	100	100	100	100	100	100	100	92.82	100	100	100	100	.	.	100	100	.	100	.	.	.	.	.	.	.	.	.	.
21053_8#27.unscaffolded_contigs_velvet.fa.tab	22	.	100	100	99.79	100	99.71	.	94.34	.	.	.	99.91	100	100	100	100	100	100	100	92.82	100	100	100	100	.	.	100	100	.	100	.	.	.	.	.	.	.	.	.	.
21053_8#35.unscaffolded_contigs_velvet.fa.tab	21	.	100	.	99.79	100	99.71	.	94.34	.	.	.	99.91	100	100	100	100	100	100	100	87.03	100	100	100	100	.	.	100	100	.	98.34	.	.	.	.	.	.	.	.	.	.
9950_1#12.unscaffolded_contigs_velvet.fa.tab	18	.	100	99.77	100	100	99.86	100	.	.	.	.	.	.	.	.	100	100	100	100	86.71	100	100	100	100	.	.	100	100	.	.	.	.	.	.	.	.	.	.	.	100
9950_1#43.unscaffolded_contigs_velvet.fa.tab	14	.	100	99.77	100	100	.	.	.	.	.	.	.	.	.	.	100	100	.	100	86.71	100	100	100	99.95	.	.	100	100	.	.	.	.	.	.	.	.	.	.	.	.
9950_1#59.unscaffolded_contigs_velvet.fa.tab	15	.	100	89.74	100	100	.	.	.	.	.	.	.	.	.	.	99.81	100	.	100	87.03	100	100	99.42	100	.	.	100	100	91.56	.	.	.	.	.	.	.	.	.	.	.
9950_1#60.unscaffolded_contigs_velvet.fa.tab	32	.	100	96.74	100	100	100	100	100	100	100	100	100	100	100	100	100	100	100	100	87.03	100	100	100	100	.	.	100	100	.	.	100	100	100	.	100	100	100	.	.	100
9950_1#67.unscaffolded_contigs_velvet.fa.tab	15	.	100	100	100	100	.	.	.	.	.	.	.	.	.	.	100	100	100	100	86.71	100	100	100	99.95	.	.	100	100	.	.	.	.	.	.	.	.	.	.	.	.
9950_1#76.unscaffolded_contigs_velvet.fa.tab	12	.	100	99.88	.	.	.	.	.	.	.	.	.	.	.	.	100	100	100	99.93	87.03	.	100	100	100	.	.	100	100	.	.	.	.	.	.	.	.	.	.	.	.
9950_1#82.unscaffolded_contigs_velvet.fa.tab	14	.	100	.	100	100	.	.	.	.	.	.	.	.	.	.	100	100	100	100	87.03	100	100	99.79	100	.	.	100	100	.	.	.	.	.	.	.	.	.	.	.	.
9950_1#84.unscaffolded_contigs_velvet.fa.tab	12	.	.	.	83.54	.	99.86	.	.	.	.	.	.	.	.	.	100	100	100	.	87.03	100	100	100	100	.	.	100	100	.	.	.	.	.	.	.	.	.	.	.	.
9950_2#15.unscaffolded_contigs_velvet.fa.tab	20	.	100	.	99.79	100	99.71	.	94.34	.	.	.	99.91	100	100	100	100	100	100	100	87.03	100	100	100	100	.	.	100	100	.	.	.	.	.	.	.	.	.	.	.	.
9950_2#29.unscaffolded_contigs_velvet.fa.tab	31	.	100	96.27	100	100	100	100	100	100	100	100	100	100	100	100	100	100	.	99.93	87.03	100	100	100	100	.	.	100	100	.	.	100	100	100	.	100	100	100	.	.	100
9950_2#31.unscaffolded_contigs_velvet.fa.tab	32	.	100	100	100	100	100	100	100	100	100	100	100	100	100	100	100	100	100	100	87.03	100	100	100	100	.	.	100	100	.	.	100	100	100	.	100	100	100	.	.	100
9950_2#46.unscaffolded_contigs_velvet.fa.tab	17	.	100	99.77	99.79	99.86	99.86	100	.	.	.	.	.	.	.	.	100	100	100	100	87.03	100	100	100	100	.	.	100	100	.	.	.	.	.	.	.	.	.	.	.	.
9950_2#59.unscaffolded_contigs_velvet.fa.tab	31	.	100	96.27	100	100	100	100	100	100	100	100	100	100	100	100	100	100	.	99.93	87.03	100	100	100	100	.	.	100	100	.	.	100	100	100	.	100	100	100	.	.	100
9950_2#68.unscaffolded_contigs_velvet.fa.tab	16	.	.	96.27	99.79	99.86	99.86	100	.	.	.	.	.	.	.	.	100	100	.	99.93	86.71	100	100	100	100	.	.	100	100	95.43	.	.	.	.	.	.	.	.	.	.	.
9950_2#7.unscaffolded_contigs_velvet.fa.tab	22	.	.	.	99.79	100	.	.	.	.	.	.	.	.	.	.	100	100	.	100	87.03	100	100	100	.	100	100	100	100	.	.	100	100	100	100	100	100	100	100	100	.
9950_2#70.unscaffolded_contigs_velvet.fa.tab	17	.	.	96.74	99.79	99.86	99.86	100	.	.	.	.	.	.	.	.	100	100	100	99.93	86.71	100	100	100	100	.	.	100	100	95.43	.	.	.	.	.	.	.	.	.	.	.
9950_2#75.unscaffolded_contigs_velvet.fa.tab	15	.	100	100	99.79	100	.	.	.	.	.	.	.	.	.	.	100	100	100	99.93	86.71	100	100	99.79	99.95	.	.	100	100	.	.	.	.	.	.	.	.	.	.	.	.
9950_2#77.unscaffolded_contigs_velvet.fa.tab	17	.	100	99.77	100	100	.	.	.	.	.	.	.	.	.	.	100	100	.	100	87.03	.	100	100	100	.	.	100	100	.	.	.	.	100	.	100	100	100	.	.	.
9950_2#90.unscaffolded_contigs_velvet.fa.tab	14	.	100	.	99.79	100	.	.	.	.	.	.	.	.	.	.	100	100	100	100	86.71	100	100	100	100	.	.	100	100	.	.	.	.	.	.	.	.	.	.	.	.
9950_3#1.unscaffolded_contigs_velvet.fa.tab	31	.	100	96.5	100	100	100	100	100	100	100	100	100	100	100	100	100	100	.	99.93	87.03	100	100	100	100	.	.	100	100	.	.	100	100	100	.	100	100	100	.	.	100
9950_3#16.unscaffolded_contigs_velvet.fa.tab	19	.	100	99.77	100	100	.	.	.	.	.	.	.	.	.	.	100	100	100	100	87.03	100	100	99.79	100	.	.	100	100	.	.	.	.	100	.	100	100	100	.	.	.
9950_3#24.unscaffolded_contigs_velvet.fa.tab	16	.	100	.	99.79	100	99.86	100	.	.	.	.	.	.	.	.	100	100	100	100	86.71	100	100	100	100	.	.	100	100	.	.	.	.	.	.	.	.	.	.	.	.
9950_3#36.unscaffolded_contigs_velvet.fa.tab	25	.	100	.	99.79	100	99.86	100	.	.	.	.	.	.	.	.	100	100	.	100	87.03	100	100	100	.	100	100	100	100	.	.	100	100	100	100	100	100	100	100	100	.
9950_3#43.unscaffolded_contigs_velvet.fa.tab	31	.	100	100	100	100	100	100	100	100	100	100	100	100	100	100	100	100	100	100	87.03	100	100	100	100	.	.	100	100	.	.	100	100	100	.	100	100	100	.	.	.
9950_3#52.unscaffolded_contigs_velvet.fa.tab	19	.	100	.	100	100	.	.	.	.	.	.	.	.	.	.	100	100	100	100	86.71	100	100	100	100	.	.	100	100	.	.	100	.	100	.	100	100	100	.	.	.
9950_3#58.unscaffolded_contigs_velvet.fa.tab	22	.	100	99.77	99.79	100	99.71	.	94.34	.	.	.	99.91	100	100	100	100	100	100	100	87.03	100	100	100	100	.	.	100	100	.	80.44	.	.	.	.	.	.	.	.	.	.
9950_3#59.unscaffolded_contigs_velvet.fa.tab	15	.	.	96.74	99.79	99.86	99.86	100	.	.	.	.	.	.	.	.	100	100	.	99.93	86.71	100	100	100	100	.	.	100	100	.	.	.	.	.	.	.	.	.	.	.	.
9950_3#68.unscaffolded_contigs_velvet.fa.tab	19	.	100	99.77	99.72	99.86	99.86	100	.	.	.	.	.	.	.	.	100	100	100	100	87.03	100	100	99.42	99.95	.	.	100	100	.	86.56	.	.	.	.	.	.	.	.	.	100
9950_3#71.unscaffolded_contigs_velvet.fa.tab	24	.	.	.	99.79	100	99.86	100	.	.	.	.	.	.	.	.	100	100	.	100	87.03	100	100	100	.	100	100	100	100	.	.	100	100	100	100	100	100	100	100	100	.
9950_3#74.unscaffolded_contigs_velvet.fa.tab	17	.	100	96.27	99.79	99.86	99.86	100	.	.	.	.	.	.	.	.	100	100	.	99.93	86.71	100	100	100	100	.	.	100	100	90.48	.	.	.	.	.	.	.	.	.	.	.
9950_3#76.unscaffolded_contigs_velvet.fa.tab	19	.	100	99.77	100	100	.	.	.	.	.	.	.	.	.	.	100	100	100	100	87.03	100	100	100	100	.	.	100	100	.	.	.	.	100	.	100	100	100	.	.	.
9950_3#80.unscaffolded_contigs_velvet.fa.tab	16	.	.	96.5	99.79	99.86	99.86	100	.	.	.	.	.	.	.	.	100	100	.	99.93	86.71	100	100	100	100	.	.	100	100	95.43	.	.	.	.	.	.	.	.	.	.	.
9950_3#82.unscaffolded_contigs_velvet.fa.tab	32	.	100	96.74	100	100	100	100	100	100	100	100	100	100	100	100	100	100	100	100	87.03	100	100	100	100	.	.	100	100	.	.	100	100	100	.	100	100	100	.	.	100
9950_3#88.unscaffolded_contigs_velvet.fa.tab	15	.	100	96.97	99.79	100	.	.	.	.	.	.	.	.	.	.	100	100	100	99.93	86.71	100	100	99.79	100	.	.	100	100	.	.	.	.	.	.	.	.	.	.	.	.
11511_7#23.unscaffolded_contigs_velvet.fa.tab	13	.	.	.	99.79	99.86	99.86	100	.	.	.	.	.	.	.	.	100	.	.	100	87.03	100	100	100	100	.	.	100	100	.	.	.	.	.	.	.	.	.	.	.	.
11511_7#55.unscaffolded_contigs_velvet.fa.tab	13	.	.	.	99.79	99.86	99.86	100	.	.	.	.	.	.	.	.	100	.	.	100	87.03	100	100	100	100	.	.	100	100	.	.	.	.	.	.	.	.	.	.	.	.
11511_7#64.unscaffolded_contigs_velvet.fa.tab	14	.	100	.	99.79	99.86	99.86	100	.	.	.	.	.	.	.	.	100	.	.	100	87.03	100	100	100	100	.	.	100	100	.	.	.	.	.	.	.	.	.	.	.	.
11657_1#91.unscaffolded_contigs_velvet.fa.tab	19	.	100	.	99.79	100	.	.	.	.	.	.	.	.	.	.	100	.	.	100	87.03	100	100	100	100	.	.	100	100	.	85.38	100	100	100	.	100	100	100	.	.	.
11657_2#53.unscaffolded_contigs_velvet.fa.tab	13	.	.	.	99.79	99.86	99.86	100	.	.	.	.	.	.	.	.	100	.	.	100	87.03	100	100	100	100	.	.	100	100	.	.	.	.	.	.	.	.	.	.	.	.
11822_1#33.unscaffolded_contigs_velvet.fa.tab	14	.	100	.	99.79	99.86	99.86	100	.	.	.	.	.	.	.	.	100	.	.	100	87.03	100	100	100	100	.	.	100	100	.	.	.	.	.	.	.	.	.	.	.	.
11822_1#53.unscaffolded_contigs_velvet.fa.tab	16	.	100	100	99.79	99.86	99.86	100	.	.	.	.	.	.	.	.	100	.	.	99.93	86.71	100	100	100	100	.	.	100	100	95.43	.	.	.	.	.	.	.	.	.	.	.
14673_1#21.unscaffolded_contigs_velvet.fa.tab	14	.	100	.	99.79	100	.	.	.	.	.	.	.	.	.	.	.	.	100	100	86.71	100	100	100	100	.	.	100	100	90.75	81.15	.	.	.	.	.	.	.	.	.	.
14673_1#5.unscaffolded_contigs_velvet.fa.tab	13	.	100	.	100	100	.	.	.	.	.	.	.	.	.	.	100	.	100	100	87.03	100	100	99.79	100	.	.	100	100	.	.	.	.	.	.	.	.	.	.	.	.
14673_1#76.unscaffolded_contigs_velvet.fa.tab	15	.	100	.	99.79	100	.	.	.	.	.	.	.	.	.	.	100	.	100	100	86.71	100	100	100	99.31	.	.	100	100	95.54	82.05	.	.	.	.	.	.	.	.	.	.
14673_2#1.unscaffolded_contigs_velvet.fa.tab	16	.	100	100	99.79	99.86	99.86	100	.	.	.	.	.	.	.	.	100	.	.	99.93	86.71	100	100	100	100	.	.	100	100	95.43	.	.	.	.	.	.	.	.	.	.	.
14673_3#26.unscaffolded_contigs_velvet.fa.tab	14	.	100	.	99.79	99.86	99.86	100	.	.	.	.	.	.	.	.	100	.	.	100	87.03	100	100	100	100	.	.	100	100	.	.	.	.	.	.	.	.	.	.	.	.
14673_3#39.unscaffolded_contigs_velvet.fa.tab	16	.	100	99.77	100	100	.	.	.	.	.	.	.	.	.	.	100	.	.	100	87.03	100	100	100	99.95	.	.	100	100	99.46	96.77	.	.	.	.	.	.	.	.	.	100
15277_1#13.unscaffolded_contigs_velvet.fa.tab	14	.	100	.	99.79	100	.	.	.	.	.	.	.	.	.	.	.	.	100	100	86.71	100	100	100	100	.	.	100	100	95.54	81.15	.	.	.	.	.	.	.	.	.	.
15608_2#14.unscaffolded_contigs_velvet.fa.tab	21	.	100	.	99.79	99.86	99.86	100	.	.	.	.	.	.	.	.	100	.	.	100	87.03	100	100	100	100	.	.	100	100	.	83.62	100	100	100	.	100	100	100	.	.	.
9950_1#35.unscaffolded_contigs_velvet.fa.tab	16	.	100	100	99.79	100	99.86	100	.	.	.	.	.	.	.	.	100	.	100	100	87.03	100	100	100	100	.	.	100	100	.	.	.	.	.	.	.	.	.	.	.	.
9950_1#36.unscaffolded_contigs_velvet.fa.tab	18	.	100	100	99.79	100	.	.	.	.	.	.	.	.	.	.	100	.	.	85.79	87.03	100	100	99.79	100	.	.	100	100	.	.	.	.	100	.	100	100	100	.	.	100
9950_1#75.unscaffolded_contigs_velvet.fa.tab	13	.	100	.	100	100	.	.	.	.	.	.	.	.	.	.	100	.	100	100	87.03	100	100	99.79	100	.	.	100	100	.	.	.	.	.	.	.	.	.	.	.	.
9950_1#90.unscaffolded_contigs_velvet.fa.tab	15	.	100	.	99.79	100	99.86	100	.	.	.	.	.	.	.	.	100	.	100	100	86.71	100	100	100	100	.	.	100	100	.	.	.	.	.	.	.	.	.	.	.	.
9950_2#25.unscaffolded_contigs_velvet.fa.tab	15	.	100	.	99.79	100	99.86	100	.	.	.	.	.	.	.	.	100	.	100	100	86.71	100	100	100	100	.	.	100	100	.	.	.	.	.	.	.	.	.	.	.	.
9950_2#26.unscaffolded_contigs_velvet.fa.tab	19	.	.	.	99.79	100	.	.	.	.	.	.	.	.	.	.	100	.	.	100	87.03	100	100	100	100	.	.	100	100	.	86.89	100	100	100	.	100	100	100	.	.	100
9950_2#30.unscaffolded_contigs_velvet.fa.tab	14	.	.	99.77	100	100	.	.	.	.	.	.	.	.	.	.	.	.	.	99.93	87.03	.	100	100	100	.	.	100	100	.	.	.	.	100	.	100	100	100	.	.	.
9950_2#35.unscaffolded_contigs_velvet.fa.tab	13	.	.	.	99.79	99.86	99.86	100	.	.	.	.	.	.	.	.	100	.	.	100	87.03	100	100	100	100	.	.	100	100	.	.	.	.	.	.	.	.	.	.	.	.
9950_2#39.unscaffolded_contigs_velvet.fa.tab	17	.	100	96.04	99.79	99.86	99.86	100	.	.	.	.	.	.	.	.	100	.	100	100	86.71	100	100	100	100	.	.	100	100	90.38	.	.	.	.	.	.	.	.	.	.	.
9950_2#42.unscaffolded_contigs_velvet.fa.tab	16	.	100	100	99.79	100	99.86	100	.	.	.	.	.	.	.	.	100	.	100	100	87.03	100	100	100	100	.	.	100	100	.	.	.	.	.	.	.	.	.	.	.	.
9950_2#51.unscaffolded_contigs_velvet.fa.tab	11	.	.	.	99.79	100	.	.	.	.	.	.	.	.	.	.	100	.	.	100	87.03	100	100	99.42	100	.	.	100	100	.	.	.	.	.	.	.	.	.	.	.	.
9950_2#81.unscaffolded_contigs_velvet.fa.tab	16	.	100	100	99.72	99.86	99.86	100	.	.	.	.	.	.	.	.	100	.	100	100	87.03	100	100	99.79	100	.	.	100	100	.	.	.	.	.	.	.	.	.	.	.	.
9950_2#87.unscaffolded_contigs_velvet.fa.tab	14	.	.	96.74	99.79	99.86	99.86	100	.	.	.	.	.	.	.	.	100	.	.	99.93	86.71	100	100	100	.	.	.	100	100	95.43	.	.	.	.	.	.	.	.	.	.	.
9950_2#9.unscaffolded_contigs_velvet.fa.tab	15	.	100	100	99.79	99.86	99.86	100	.	.	.	.	.	.	.	.	100	.	.	99.93	86.71	100	100	100	100	.	.	100	100	.	.	.	.	.	.	.	.	.	.	.	.
9950_3#13.unscaffolded_contigs_velvet.fa.tab	17	.	100	99.77	100	100	.	.	.	.	.	.	.	.	.	.	100	.	.	100	87.03	.	100	100	100	.	.	100	100	93.6	.	.	.	100	.	100	100	100	.	.	.
9950_3#18.unscaffolded_contigs_velvet.fa.tab	16	.	100	99.77	100	100	.	.	.	.	.	.	.	.	.	.	100	.	.	100	87.03	.	100	100	100	.	.	100	100	.	.	.	.	100	.	100	100	100	.	.	.
9950_3#2.unscaffolded_contigs_velvet.fa.tab	16	.	.	100	99.79	99.86	99.86	100	.	.	.	.	.	.	.	.	100	.	100	99.93	86.71	100	100	100	100	.	.	100	100	95.43	.	.	.	.	.	.	.	.	.	.	.
9950_3#27.unscaffolded_contigs_velvet.fa.tab	13	.	.	.	99.79	99.86	99.86	100	.	.	.	.	.	.	.	.	100	.	.	100	87.03	100	100	100	100	.	.	100	100	.	.	.	.	.	.	.	.	.	.	.	.
9950_3#34.unscaffolded_contigs_velvet.fa.tab	15	.	.	96.27	99.79	99.86	99.86	100	.	.	.	.	.	.	.	.	100	.	100	99.93	86.71	100	100	100	100.00;100.00	.	.	100	100	.	.	.	.	.	.	.	.	.	.	.	.
9950_3#60.unscaffolded_contigs_velvet.fa.tab	17	.	100	99.77	99.72	99.86	99.86	100	.	.	.	.	.	.	.	.	100	.	100	100	87.03	100	100	99.42	99.95	.	.	100	100	.	.	.	.	.	.	.	.	.	.	.	100
9950_3#63.unscaffolded_contigs_velvet.fa.tab	13	.	.	.	99.79	99.86	99.86	100	.	.	.	.	.	.	.	.	100	.	.	100	87.03	100	100	100	100	.	.	100	100	.	.	.	.	.	.	.	.	.	.	.	.
9950_3#66.unscaffolded_contigs_velvet.fa.tab	14	.	.	.	99.79	99.86	99.86	100	.	.	.	.	.	.	.	.	100	.	100	100	87.03	100	100	100	100	.	.	100	100	.	.	.	.	.	.	.	.	.	.	.	.
9950_3#67.unscaffolded_contigs_velvet.fa.tab	15	.	.	100	99.79	99.86	99.86	100	.	.	.	.	.	.	.	.	100	.	.	99.93	86.71	100	100	100	100	.	.	100	100	95.43	.	.	.	.	.	.	.	.	.	.	.
9950_3#69.unscaffolded_contigs_velvet.fa.tab	17	.	.	.	99.79	100	.	.	.	.	.	.	.	.	.	.	100	.	.	100	87.03	100	100	100	100	.	.	100	100	.	.	100	100	100	.	100	100	100	.	.	.
9950_3#7.unscaffolded_contigs_velvet.fa.tab	14	.	100	96.27	99.79	100	.	.	.	.	.	.	.	.	.	.	100	.	100	99.93	86.71	100	100	99.79	100	.	.	100	100	.	.	.	.	.	.	.	.	.	.	.	.
9950_3#72.unscaffolded_contigs_velvet.fa.tab	13	.	100	.	99.79	100	.	.	.	.	.	.	.	.	.	.	100	.	100	100	86.71	100	100	100	100	.	.	100	100	.	.	.	.	.	.	.	.	.	.	.	.
9950_3#73.unscaffolded_contigs_velvet.fa.tab	13	.	.	.	99.79	99.86	99.86	100	.	.	.	.	.	.	.	.	100	.	.	100	87.03	100	100	100	100	.	.	100	100	.	.	.	.	.	.	.	.	.	.	.	.
9950_3#86.unscaffolded_contigs_velvet.fa.tab	16	.	100	100	99.72	99.86	99.86	100	.	.	.	.	.	.	.	.	100	.	100	100	87.03	100	100	99.79	100.00;100.00	.	.	100	100	.	.	.	.	.	.	.	.	.	.	.	.
9950_3#9.unscaffolded_contigs_velvet.fa.tab	12	.	100	99.77	100	100	.	.	.	.	.	.	.	.	.	.	100	.	.	99.93	87.03	.	100	100	100	.	.	100	100	.	.	.	.	.	.	.	.	.	.	.	.
11826_1#77.unscaffolded_contigs_velvet.fa.tab	17	.	100	.	99.79	100	99.86	100	.	.	.	.	.	.	.	.	100	100.00;80.88	100	100	86.71	100	100	100	100	.	.	100	100	.	99.34	.	.	.	.	.	.	.	.	.	.
14673_2#35.unscaffolded_contigs_velvet.fa.tab	16	.	100	.	99.79	100	.	.	.	.	.	.	.	.	.	.	100	100.00;81.50	100	100	86.71	100	100	100	100	.	.	100	100	95.54	81.15	.	.	.	.	.	.	.	.	.	.
11679_1#46.unscaffolded_contigs_velvet.fa.tab	19	.	100	100	99.79	100	99.86	100	.	.	.	.	.	.	.	.	100	100.00;83.80	100	100	87.03	100	100	100	100	.	.	100	100	95.97	98.15	.	.	.	.	.	.	.	.	.	.
9950_3#55.unscaffolded_contigs_velvet.fa.tab	22	.	100	95.57	99.79	99.86	99.86	99.56	.	.	.	.	.	.	.	.	100	100.00;89.97	100	100	87.03	100	100	100	100.00;100.00;100.00;100.00	98.01	100	100	100	.	.	.	.	.	100	.	.	.	100	94.03	.
15608_2#27.unscaffolded_contigs_velvet.fa.tab	15	.	100	.	99.79	99.86	99.86	100	.	.	.	.	.	.	.	.	100	100.00;95.82	.	100	87.03	100	100	100	100	.	.	100	100	.	.	.	.	.	.	.	.	.	.	.	.
11511_7#24.unscaffolded_contigs_velvet.fa.tab	15	.	100	.	99.79	99.86	99.86	100	.	.	.	.	.	.	.	.	100	100.00;97.07	.	100	87.03	100	100	100	100	.	.	100	100	.	.	.	.	.	.	.	.	.	.	.	.
11511_7#36.unscaffolded_contigs_velvet.fa.tab	18	.	100	100	99.72	99.86	99.86	100	.	.	.	.	.	.	.	.	100	100.00;97.07	100	100	87.03	100	100	99.79	100	.	.	100	100	.	87.84	.	.	.	.	.	.	.	.	.	.
11511_7#41.unscaffolded_contigs_velvet.fa.tab	18	.	100	100	99.79	100	.	.	.	.	.	.	.	.	.	.	100	100.00;97.07	.	100	87.03	100	100	100	100	.	.	100	100	.	.	.	.	100	.	100	100	100	.	.	.
11511_7#70.unscaffolded_contigs_velvet.fa.tab	16	.	.	100	99.72	99.86	99.86	100	.	.	.	.	.	.	.	.	100	100.00;97.07	100	100	87.03	100	100	100	100	.	.	100	100	.	.	.	.	.	.	.	.	.	.	.	.
11511_7#72.unscaffolded_contigs_velvet.fa.tab	18	.	100	100	99.79	100	.	.	.	.	.	.	.	.	.	.	100	100.00;97.07	.	100	87.03	100	100	100	100	.	.	100	100	.	.	.	.	100	.	100	100	100	.	.	.
11511_7#78.unscaffolded_contigs_velvet.fa.tab	16	.	100	100	99.79	100	.	.	.	.	.	.	.	.	.	.	100	100.00;97.07	100	99.93	86.71	100	100	99.79	100	.	.	100	100	.	98.81	.	.	.	.	.	.	.	.	.	.
11511_8#30.unscaffolded_contigs_velvet.fa.tab	13	.	100	99.88	.	.	.	.	.	.	.	.	.	.	.	.	100	100.00;97.07	100	99.93	87.03	.	100	100	100	.	.	100	100	.	98.15	.	.	.	.	.	.	.	.	.	.
11657_2#2.unscaffolded_contigs_velvet.fa.tab	17	.	100	100	99.72	99.86	99.86	100	.	.	.	.	.	.	.	.	100	100.00;97.07	100	100	87.03	100	100	99.79	100	.	.	100	100	.	.	.	.	.	.	.	.	.	.	.	.
11657_2#52.unscaffolded_contigs_velvet.fa.tab	17	.	100	100	99.72	99.86	99.86	100	.	.	.	.	.	.	.	.	100	100.00;97.07	100	100	87.03	100	100	99.79	100	.	.	100	100	.	.	.	.	.	.	.	.	.	.	.	.
11657_2#72.unscaffolded_contigs_velvet.fa.tab	18	.	100	100	99.79	100	.	.	.	.	.	.	.	.	.	.	100	100.00;97.07	.	100	87.03	100	100	100	100	.	.	100	100	.	.	.	.	100	.	100	100	100	.	.	.
11657_2#78.unscaffolded_contigs_velvet.fa.tab	18	.	100	100	99.79	100	.	.	.	.	.	.	.	.	.	.	100	100.00;97.07	.	100	87.03	100	100	100	100	.	.	100	100	.	.	.	.	100	.	100	100	100	.	.	.
11657_2#9.unscaffolded_contigs_velvet.fa.tab	23	.	100	100	99.79	100	.	.	.	.	.	.	.	.	.	.	100	100.00;97.07	.	100	87.03	100	100	100	100	100	100	100	100	.	.	.	.	100	99.82	100	100	100	100	100	.
11658_2#56.unscaffolded_contigs_velvet.fa.tab	15	.	100	100	99.79	100	.	.	.	.	.	.	.	.	.	.	100	100.00;97.07	100	100	87.03	100	100	100	100	.	.	100	100	.	.	.	.	.	.	.	.	.	.	.	.
11679_1#1.unscaffolded_contigs_velvet.fa.tab	12	.	.	.	83.54	.	99.86	.	.	.	.	.	.	.	.	.	100	100.00;97.07	100	.	100	100	100	99.79	100	.	.	100	100	.	.	.	.	.	.	.	.	.	.	.	.
11822_1#11.unscaffolded_contigs_velvet.fa.tab	18	.	100	100	99.72	99.86	99.86	100	.	.	.	.	.	.	.	.	100	100.00;97.07	100	100	87.03	100	100	99.79	100	.	.	100	100	.	98.81	.	.	.	.	.	.	.	.	.	.
11822_1#32.unscaffolded_contigs_velvet.fa.tab	17	.	100	100	99.72	99.86	99.86	100	.	.	.	.	.	.	.	.	100	100.00;97.07	100	100	87.03	100	100	.	100	.	.	100	100	.	86.32	.	.	.	.	.	.	.	.	.	.
11822_1#38.unscaffolded_contigs_velvet.fa.tab	14	.	100	.	99.79	100	.	.	.	.	.	.	.	.	.	.	100	100.00;97.07	.	100	87.03	100	100	99.42	100	.	.	100	100	93.82	.	.	.	.	.	.	.	.	.	.	.
11822_1#47.unscaffolded_contigs_velvet.fa.tab	18	.	100	100	99.72	99.86	99.86	100	.	.	.	.	.	.	.	.	88.75	100.00;97.07	100	100	87.03	100	100	99.79	100	.	.	100	100	.	89.79	.	.	.	.	.	.	.	.	.	.
11822_1#5.unscaffolded_contigs_velvet.fa.tab	21	.	100	.	99.79	100	.	.	.	.	.	.	.	.	.	.	100	100.00;97.07	.	100	87.03	100	100	100	100	.	.	100	100	.	86.89	100	100	100	.	100	100	100	.	.	100
11822_1#69.unscaffolded_contigs_velvet.fa.tab	18	.	100	100	99.72	99.86	99.86	100	.	.	.	.	.	.	.	.	100	100.00;97.07	100	100	87.03	100	100	99.79	100	.	.	100	100	.	81.91	.	.	.	.	.	.	.	.	.	.
11822_1#95.unscaffolded_contigs_velvet.fa.tab	12	.	.	.	83.54	.	99.86	.	.	.	.	.	.	.	.	.	100	100.00;97.07	100	.	100	100	100	99.79	100	.	.	100	100	.	.	.	.	.	.	.	.	.	.	.	.
11826_1#26.unscaffolded_contigs_velvet.fa.tab	18	.	100	100	99.72	99.86	99.86	100	.	.	.	.	.	.	.	.	100	100.00;97.07	100	100	87.03	100	100	99.79	100	.	.	100	100	.	98.81	.	.	.	.	.	.	.	.	.	.
11826_1#37.unscaffolded_contigs_velvet.fa.tab	18	.	100	100	99.72	99.86	99.86	100	.	.	.	.	.	.	.	.	100	100.00;97.07	100	100	87.03	100	100	99.79	100	.	.	100	100	.	98.81	.	.	.	.	.	.	.	.	.	.
11826_1#50.unscaffolded_contigs_velvet.fa.tab	18	.	100	100	99.72	99.86	99.86	100	.	.	.	.	.	.	.	.	100	100.00;97.07	100	100	87.03	100	100	99.79	100	.	.	100	100	.	95.73	.	.	.	.	.	.	.	.	.	.
11826_1#57.unscaffolded_contigs_velvet.fa.tab	18	.	100	100	99.72	99.86	99.86	100	.	.	.	.	.	.	.	.	100	100.00;97.07	100	100	87.03	100	100	99.79	100	.	.	100	100	.	80.58	.	.	.	.	.	.	.	.	.	.
11826_1#61.unscaffolded_contigs_velvet.fa.tab	18	.	100	100	99.79	100	.	.	.	.	.	.	.	.	.	.	100	100.00;97.07	.	100	87.03	100	100	100	100	.	.	100	100	.	.	.	.	100	.	100	100	100	.	.	.
12291_5#25.unscaffolded_contigs_velvet.fa.tab	14	.	.	.	99.79	99.86	99.86	100	.	.	.	.	.	.	.	.	100	100.00;97.07	.	100	87.03	100	100	100	100	.	.	100	100	.	.	.	.	.	.	.	.	.	.	.	.
14673_1#26.unscaffolded_contigs_velvet.fa.tab	14	.	100	.	99.79	100	.	.	.	.	.	.	.	.	.	.	100	100.00;97.07	.	100	87.03	100	100	99.42	100	.	.	100	100	96.08	.	.	.	.	.	.	.	.	.	.	.
14673_1#30.unscaffolded_contigs_velvet.fa.tab	15	.	100	100	99.79	100	.	.	.	.	.	.	.	.	.	.	100	100.00;97.07	100	100	87.03	100	100	99.68	100	.	.	100	100	.	.	.	.	.	.	.	.	.	.	.	.
14673_1#31.unscaffolded_contigs_velvet.fa.tab	17	.	100	100	99.72	99.86	99.86	100	.	.	.	.	.	.	.	.	100	100.00;97.07	.	100	87.03	100	100	99.15	100	.	.	100	100	.	80.67	.	.	.	.	.	.	.	.	.	.
14673_1#8.unscaffolded_contigs_velvet.fa.tab	13	.	.	.	83.54	.	99.86	.	.	.	.	.	.	.	.	.	100	100.00;97.07	100	.	100	100	100	99.79	100	.	.	100	100	90.92	.	.	.	.	.	.	.	.	.	.	.
14673_2#28.unscaffolded_contigs_velvet.fa.tab	18	.	100	100	99.72	99.86	99.86	100	.	.	.	.	.	.	.	.	100	100.00;97.07	100	100	87.03	100	100	99.79	100	.	.	100	100	.	98.81	.	.	.	.	.	.	.	.	.	.
14673_2#33.unscaffolded_contigs_velvet.fa.tab	13	.	100	.	99.79	100	.	.	.	.	.	.	.	.	.	.	100	100.00;97.07	.	100	87.03	100	100	99.42	100	.	.	100	100	.	.	.	.	.	.	.	.	.	.	.	.
14673_2#36.unscaffolded_contigs_velvet.fa.tab	13	.	100	.	99.79	100	.	.	.	.	.	.	.	.	.	.	100	100.00;97.07	.	100	87.03	100	100	99.42	100	.	.	100	100	.	.	.	.	.	.	.	.	.	.	.	.
14673_2#42.unscaffolded_contigs_velvet.fa.tab	14	.	100	.	99.79	100	.	.	.	.	.	.	.	.	.	.	100	100.00;97.07	.	100	87.03	100	100	99.42	100	.	.	100	100	99.35	.	.	.	.	.	.	.	.	.	.	.
14673_2#44.unscaffolded_contigs_velvet.fa.tab	17	.	100	100	99.72	99.86	99.86	100	.	.	.	.	.	.	.	.	100	100.00;97.07	100	100	86.71	100	100	99.79	100	.	.	100	100	.	.	.	.	.	.	.	.	.	.	.	.
14673_2#6.unscaffolded_contigs_velvet.fa.tab	17	.	100	100	99.72	99.86	99.86	100	.	.	.	.	.	.	.	.	100	100.00;97.07	100	100	87.03	100	100	99.79	100	.	.	100	100	.	.	.	.	.	.	.	.	.	.	.	.
14673_2#80.unscaffolded_contigs_velvet.fa.tab	14	.	100	.	99.79	100	.	.	.	.	.	.	.	.	.	.	100	100.00;97.07	.	100	87.03	100	100	99.42	100	.	.	100	100	94.68	.	.	.	.	.	.	.	.	.	.	.
14673_3#1.unscaffolded_contigs_velvet.fa.tab	15	.	100	.	99.79	100	.	.	.	.	.	.	.	.	.	.	100	100.00;97.07	100	100	86.71	100	100	100	100	.	.	100	100	.	82.05	.	.	.	.	.	.	.	.	.	.
14673_3#14.unscaffolded_contigs_velvet.fa.tab	18	.	100	100	99.72	99.86	99.86	100	.	.	.	.	.	.	.	.	100	100.00;97.07	100	100	87.03	100	100	99.79	100	.	.	100	100	.	98.67	.	.	.	.	.	.	.	.	.	.
15608_2#46.unscaffolded_contigs_velvet.fa.tab	18	.	100	100	99.72	99.86	99.86	100	.	.	.	.	.	.	.	.	100	100.00;97.07	100	100	87.03	100	100	99.79	100	.	.	100	100	.	87.37	.	.	.	.	.	.	.	.	.	.
15608_2#6.unscaffolded_contigs_velvet.fa.tab	13	.	100	.	99.79	100	.	.	.	.	.	.	.	.	.	.	100	100.00;97.07	.	100	87.03	100	100	99.42	100	.	.	100	100	.	.	.	.	.	.	.	.	.	.	.	.
15608_2#66.unscaffolded_contigs_velvet.fa.tab	18	.	100	100	99.72	99.86	99.86	100	.	.	.	.	.	.	.	.	100	100.00;97.07	100	100	87.03	100	100	99.79	100	.	.	100	100	.	98.67	.	.	.	.	.	.	.	.	.	.
19084_8#142.unscaffolded_contigs_velvet.fa.tab	19	.	100	99.77	100	100	.	.	.	.	.	.	.	.	.	.	100	100.00;97.07	.	100	87.03	100	100	99.79	100	.	.	100	100	.	88.56	.	.	100	.	100	100	100	.	.	.
14673_4#36.unscaffolded_contigs_velvet.fa.tab	15	.	100	99.77	100	100	.	.	.	.	.	.	.	.	.	.	100	100.00;97.07;83.91	100	100	87.03	100	100	99.79	100	.	.	100	100	.	.	.	.	.	.	.	.	.	.	.	.
19084_8#152.unscaffolded_contigs_velvet.fa.tab	14	.	.	.	99.79	99.86	99.86	100	.	.	.	.	.	.	.	.	100	100.00;97.07;97.18	.	100	87.03	100	100	100	100	.	.	100	100	.	.	.	.	.	.	.	.	.	.	.	.
15608_2#10.unscaffolded_contigs_velvet.fa.tab	18	.	100	99.77	100	100	.	.	.	.	.	.	.	.	.	.	100	100.00;97.07;97.70	.	99.93	87.03	.	100	100	100	.	.	100	100	86.77	.	.	.	100	.	100	100	100	.	.	.
11511_8#21.unscaffolded_contigs_velvet.fa.tab	14	.	100	100	99.79	100	.	.	.	.	.	.	.	.	.	.	100	100.00;97.18	.	100	87.03	100	100	99.68	100	.	.	100	100	.	.	.	.	.	.	.	.	.	.	.	.
11511_8#46.unscaffolded_contigs_velvet.fa.tab	23	91.55	100	100	99.79	100	.	.	.	.	.	.	.	.	.	.	100	100.00;97.18	100	100	87.03	100	100	100	100	.	.	100	100	.	.	100	100	100	.	100	100	100	.	.	100
11511_8#51.unscaffolded_contigs_velvet.fa.tab	15	.	100	.	99.79	99.86	99.86	100	.	.	.	.	.	.	.	.	100	100.00;97.18	.	100	87.03	100	100	100	100	.	.	100	100	.	.	.	.	.	.	.	.	.	.	.	.
11657_2#68.unscaffolded_contigs_velvet.fa.tab	16	.	.	100	99.79	99.86	99.86	100	.	.	.	.	.	.	.	.	100	100.00;97.18	.	99.93	86.71	100	100	100	100	.	.	100	100	95.43	.	.	.	.	.	.	.	.	.	.	.
11657_4#5.unscaffolded_contigs_velvet.fa.tab	15	.	100	100	99.79	100	.	.	.	.	.	.	.	.	.	.	100	100.00;97.18	100	100	87.03	100	100	100	100	.	.	100	100	.	.	.	.	.	.	.	.	.	.	.	.
11822_1#71.unscaffolded_contigs_velvet.fa.tab	16	.	100	100	99.79	100	.	.	.	.	.	.	.	.	.	.	100	100.00;97.18	100	100	87.03	100	100	100	100	.	.	100	100	.	80.2	.	.	.	.	.	.	.	.	.	.
14673_1#59.unscaffolded_contigs_velvet.fa.tab	22	.	100	100	99.79	99.86	99.86	99.56	.	.	.	.	.	.	.	.	100	100.00;97.18	.	100	87.03	100	100	100	100	100	100	100	100	.	98.81	.	.	.	100	.	.	.	100	94.03	.
14673_2#21.unscaffolded_contigs_velvet.fa.tab	22	.	100	100	99.79	99.86	99.86	99.56	.	.	.	.	.	.	.	.	100	100.00;97.18	.	100	87.03	100	100	100	100	100	99.92	100	100	.	98.81	.	.	.	100	.	.	.	100	94.03	.
14673_3#30.unscaffolded_contigs_velvet.fa.tab	17	.	.	99.77	99.65	99.86	99.86	100	.	.	.	.	.	.	.	.	100	100.00;97.18	.	100	87.03	100	100	99.79	100	.	.	100	100	90.59	95.01	.	.	.	.	.	.	.	.	.	.
15608_2#15.unscaffolded_contigs_velvet.fa.tab	20	.	100	99.77	100	100	99.86	100	.	.	.	.	.	.	.	.	100	100.00;97.18	100	100	86.71	100	100	100	100	.	.	100	100	97.81	82.53	.	.	.	.	.	.	.	.	.	100
19084_8#143.unscaffolded_contigs_velvet.fa.tab	21	.	100	100	99.79	99.86	99.86	99.56	.	.	.	.	.	.	.	.	100	100.00;97.18	.	100	87.03	100	100	100	100	100	100	100	100	.	.	.	.	.	100	.	.	.	100	94.03	.
9950_3#17.unscaffolded_contigs_velvet.fa.tab	18	.	100	100	99.72	99.86	99.86	100	.	.	.	.	.	.	.	.	100	100.00;97.18	100	100	87.03	100	100	99.79	100	.	.	100	100	.	91.74	.	.	.	.	.	.	.	.	.	.
11657_2#57.unscaffolded_contigs_velvet.fa.tab	22	.	100	100	99.79	99.86	99.86	99.56	.	.	.	.	.	.	.	.	100	100.00;97.60	.	100	87.03	100	100	100	100	100	100	100	100	.	98.15	.	.	.	100	.	.	.	100	94.03	.
19084_8#153.unscaffolded_contigs_velvet.fa.tab	19	.	100	100	99.79	99.86	99.86	99.56	.	.	.	.	.	.	.	.	100	100.00;97.60	100	100	86.71	100	100	100	100	.	.	100	100	95.43	97.53	.	.	.	.	.	.	.	.	.	.
11511_8#44.unscaffolded_contigs_velvet.fa.tab	32	88.9	100	100	100	100	100	100	100	100	100	100	100	100	100	100	100	100.00;97.70	.	99.93	87.03	100	100	100	100	.	.	100	100	.	.	100	100	100	.	100	100	100	.	.	100
11657_1#81.unscaffolded_contigs_velvet.fa.tab	12	.	.	.	100	100	.	.	.	.	.	.	.	.	.	.	.	100.00;97.70	100	100	87.03	.	100	100	100	.	.	100	100	93.66	.	.	.	.	.	.	.	.	.	.	.
11657_2#18.unscaffolded_contigs_velvet.fa.tab	18	.	100	100	99.72	99.86	99.86	100	.	.	.	.	.	.	.	.	100	100.00;97.70	100	100	87.03	100	100	99.79	100	.	.	100	100	.	98.81	.	.	.	.	.	.	.	.	.	.
11791_1#23.unscaffolded_contigs_velvet.fa.tab	19	.	100	.	99.79	100	.	.	.	.	.	.	.	.	.	.	100	100.00;97.70	.	100	87.03	.	100	100	100	.	.	100	100	.	99.29	100	100	100	.	100	100	100	.	.	.
11826_1#44.unscaffolded_contigs_velvet.fa.tab	20	.	100	.	99.79	100	.	.	.	.	.	.	.	.	.	.	100	100.00;97.70	.	100	87.03	100	100	99.79	100	.	.	100	100	.	86.89	100	100	100	.	100	100	100	.	.	.
11826_1#7.unscaffolded_contigs_velvet.fa.tab	17	.	100	100	99.72	99.86	99.86	100	.	.	.	.	.	.	.	.	100	100.00;97.70	.	100	87.03	100	100	99.79	100	.	.	100	100	.	98.53	.	.	.	.	.	.	.	.	.	.
12291_5#8.unscaffolded_contigs_velvet.fa.tab	21	.	100	.	99.79	100	.	.	.	.	.	.	.	.	.	.	100	100.00;97.70	.	100	87.03	100	100	100	100	.	.	100	100	.	86.89	100	100	100	.	100	100	100	.	.	100
14673_1#38.unscaffolded_contigs_velvet.fa.tab	19	.	100	.	.	100	.	.	.	.	.	.	.	.	.	.	99.81	100.00;97.70	.	100	87.03	100	100	100	100	.	.	100	100	.	99.29	100	100	100	.	100	100	100	.	.	.
14673_1#75.unscaffolded_contigs_velvet.fa.tab	13	.	100	99.88	.	.	.	.	.	.	.	.	.	.	.	.	100	100.00;97.70	100	99.93	87.03	.	100	100	100	.	.	100	100	.	98.01	.	.	.	.	.	.	.	.	.	.
14673_2#17.unscaffolded_contigs_velvet.fa.tab	15	.	100	.	99.79	100	.	.	.	.	.	.	.	.	.	.	100	100.00;97.70	.	100	87.03	100	100	100	100	.	.	100	100	.	86.89	.	.	.	.	.	.	.	.	.	100
15277_1#12.unscaffolded_contigs_velvet.fa.tab	15	.	100	99.77	100	100	.	.	.	.	.	.	.	.	.	.	100	100.00;97.70	100	100	86.71	100	100	100	100	.	.	100	100	.	.	.	.	.	.	.	.	.	.	.	.
15608_2#43.unscaffolded_contigs_velvet.fa.tab	20	.	100	.	99.79	100	.	.	.	.	.	.	.	.	.	.	100	100.00;97.70	.	100	87.03	100	100	100	100	.	.	100	100	.	86.89	100	.	100	.	100	100	100	.	.	100
15608_3#25.unscaffolded_contigs_velvet.fa.tab	20	.	100	.	99.79	100	.	.	.	.	.	.	.	.	.	.	100	100.00;97.70	.	100	87.03	100	100	100	100	.	.	100	100	.	99.29	100	100	100	.	100	100	100	.	.	.
9950_2#61.unscaffolded_contigs_velvet.fa.tab	21	.	100	.	99.79	99.86	99.86	100	.	.	.	.	.	.	.	.	100	100.00;97.70	.	100	87.03	100	100	100	100	.	.	100	100	.	.	100	100	100	.	100	100	100	.	.	.
9950_3#79.unscaffolded_contigs_velvet.fa.tab	19	.	.	.	99.79	100	.	.	.	.	.	.	.	.	.	.	100	100.00;97.70	.	100	87.03	100	100	100	100	.	.	100	100	.	84.9	100	100	100	.	100	100	100	.	.	.
9950_1#29.unscaffolded_contigs_velvet.fa.tab	12	.	.	.	83.54	.	99.86	.	.	.	.	.	.	.	.	.	100	80.46;83.39	100	.	100	100	100	99.79	100	.	.	100	100	.	.	.	.	.	.	.	.	.	.	.	.
9950_3#44.unscaffolded_contigs_velvet.fa.tab	20	.	100	99.77	99.79	100	.	.	.	.	.	.	.	.	.	.	100	84.64;87.57	.	100	87.03	100	100	99.84	100	.	.	100	100	.	.	100	100	100	.	100	100	100	.	.	.
9950_2#76.unscaffolded_contigs_velvet.fa.tab	17	.	100	100	99.72	99.86	99.86	100	.	.	.	.	.	.	.	.	100	85.06;87.98	100	100	87.03	100	100	99.79	100	.	.	100	100	.	.	.	.	.	.	.	.	.	.	.	.
14673_4#41.unscaffolded_contigs_velvet.fa.tab	17	.	100	99.77	100	100	.	.	.	.	.	.	.	.	.	.	100	85.48;100.00	.	100	87.03	100	100	100	99.95	.	.	100	100	99.46	96.77	.	.	.	.	.	.	.	.	.	100
9950_2#12.unscaffolded_contigs_velvet.fa.tab	15	.	100	100	99.79	100	.	.	.	.	.	.	.	.	.	.	100	85.68;82.86	100	99.93	86.71	100	100	99.79	100	.	.	100	100	.	.	.	.	.	.	.	.	.	.	.	.
9950_2#72.unscaffolded_contigs_velvet.fa.tab	21	.	100	96.27	99.79	99.86	99.86	99.56	.	.	.	.	.	.	.	.	100	85.79;85.79	.	100	87.03	100	100	100	100	100	100	100	100	.	.	.	.	.	100	.	.	.	100	94.03	.
15608_3#17.unscaffolded_contigs_velvet.fa.tab	18	.	100	100	99.79	99.86	99.86	99.56	.	.	.	.	.	.	.	.	100	86.00;83.91;100.00	100	100	86.71	100	100	100	100	.	.	100	100	.	98.58	.	.	.	.	.	.	.	.	.	.
11511_7#53.unscaffolded_contigs_velvet.fa.tab	15	.	100	.	99.79	99.86	99.86	100	.	.	.	.	.	.	.	.	100	86.31;83.49	.	100	87.03	100	100	100	100	.	.	100	100	.	.	.	.	.	.	.	.	.	.	.	.
9950_3#90.unscaffolded_contigs_velvet.fa.tab	15	.	100	100	99.79	100	.	.	.	.	.	.	.	.	.	.	100	87.15;84.22	100	100	87.03	100	100	99.68	100	.	.	100	99.89	.	.	.	.	.	.	.	.	.	.	.	.
9950_3#5.unscaffolded_contigs_velvet.fa.tab	17	.	100	100	99.72	99.86	99.86	100	.	.	.	.	.	.	.	.	100	87.46;85.68;80.88	100	99.93	86.71	100	100	99.79	100	.	.	100	100	.	.	.	.	.	.	.	.	.	.	.	.
9950_2#84.unscaffolded_contigs_velvet.fa.tab	17	.	100	96.74	99.79	99.86	99.86	100	.	.	.	.	.	.	.	.	100	87.98;85.06	.	100	87.03	100	100	100	100	.	.	100	100	95.43	.	.	.	.	.	.	.	.	.	.	.
11657_2#86.unscaffolded_contigs_velvet.fa.tab	15	.	100	93.47	99.79	100	.	.	.	.	.	.	.	.	.	.	100	88.40;85.48	100	100	87.03	100	100	100	100	.	.	100	100	.	.	.	.	.	.	.	.	.	.	.	.
14673_3#25.unscaffolded_contigs_velvet.fa.tab	19	.	100	100	99.72	99.86	99.86	100	.	.	.	.	.	.	.	.	100	89.97;80.04	100	100	87.03	100	100	99.79	100	.	.	100	100	91.41	98.67	.	.	.	.	.	.	.	.	.	.
14673_1#61.unscaffolded_contigs_velvet.fa.tab	14	.	100	99.77	99.79	100	.	.	.	.	.	.	.	.	.	.	100	91.95;91.85;100.00	.	99.93	87.03	100	100	99.79	100	.	.	100	100	.	.	.	.	.	.	.	.	.	.	.	.
11511_7#62.unscaffolded_contigs_velvet.fa.tab	17	.	100	99.77	99.79	100	99.86	100	.	.	.	.	.	.	.	.	100	92.89;100.00	100	100	87.03	100	100	100	100	.	.	100	100	.	.	.	.	.	.	.	.	.	.	.	.
11657_4#46.unscaffolded_contigs_velvet.fa.tab	15	.	100	.	99.79	99.86	99.86	100	.	.	.	.	.	.	.	.	100	95.82;95.82;100.00	.	100	87.03	100	100	100	100	.	.	100	100	.	.	.	.	.	.	.	.	.	.	.	.
11657_8#65.unscaffolded_contigs_velvet.fa.tab	18	.	100	99.77	100	100	.	.	.	.	.	.	.	.	.	.	100	96.97;100.00	100	99.93	87.03	.	100	100	100	.	.	100	100	.	.	.	.	100	.	100	100	100	.	.	.
14673_2#39.unscaffolded_contigs_velvet.fa.tab	20	.	100	99.77	100	100	.	.	.	.	.	.	.	.	.	.	100	96.97;100.00	.	99.93	87.03	.	100	100	100	.	.	100	100	95.54	.	100	100	100	.	100	100	100	.	.	.
15608_2#16.unscaffolded_contigs_velvet.fa.tab	17	.	100	100	99.79	99.86	99.86	100	.	.	.	.	.	.	.	.	100	96.97;100.00	.	99.93	86.71	100	100	100	100	.	.	100	100	95.43	.	.	.	.	.	.	.	.	.	.	.
15608_2#17.unscaffolded_contigs_velvet.fa.tab	17	.	100	100	99.79	99.86	99.86	100	.	.	.	.	.	.	.	.	100	96.97;100.00	.	99.93	86.71	100	100	100	88.06	.	.	100	100	95.43	.	.	.	.	.	.	.	.	.	.	.
19084_8#120.unscaffolded_contigs_velvet.fa.tab	21	.	100	99.77	100	100	.	.	.	.	.	.	.	.	.	.	100	96.97;100.00	100	100	87.03	100	100	99.79	100	.	.	100	100	97.58	82.95	.	.	100	.	100	100	100	.	.	.
19084_8#150.unscaffolded_contigs_velvet.fa.tab	17	.	100	100	99.79	99.86	99.86	100	.	.	.	.	.	.	.	.	100	96.97;100.00	.	99.93	86.71	100	100	100	100	.	.	100	100	95.43	.	.	.	.	.	.	.	.	.	.	.
14673_2#23.unscaffolded_contigs_velvet.fa.tab	13	.	.	99.77	100	100	.	.	.	.	.	.	.	.	.	.	100	96.97;97.18;100.00	.	100	87.03	.	100	100	100	.	.	100	100	99.52	.	.	.	.	.	.	.	.	.	.	.
11657_2#80.unscaffolded_contigs_velvet.fa.tab	17	.	100	100	99.79	99.86	99.86	100	.	.	.	.	.	.	.	.	100	97.07;100.00	.	99.93	86.71	100	100	100	100	.	.	100	100	95.43	.	.	.	.	.	.	.	.	.	.	.
11657_8#74.unscaffolded_contigs_velvet.fa.tab	14	.	.	.	99.79	99.86	99.86	100	.	.	.	.	.	.	.	.	100	97.07;100.00	.	100	87.03	100	100	100	100	.	.	100	100	.	.	.	.	.	.	.	.	.	.	.	.
11658_8#5.unscaffolded_contigs_velvet.fa.tab	18	.	100	100	99.72	99.86	99.86	100	.	.	.	.	.	.	.	.	100	97.07;100.00	100	100	87.03	100	100	99.79	100	.	.	100	100	.	98.67	.	.	.	.	.	.	.	.	.	.
11822_1#68.unscaffolded_contigs_velvet.fa.tab	15	.	100	.	99.79	99.86	99.86	100	.	.	.	.	.	.	.	.	100	97.07;100.00	.	100	87.03	100	100	100	100	.	.	100	100	.	.	.	.	.	.	.	.	.	.	.	.
11826_1#10.unscaffolded_contigs_velvet.fa.tab	17	.	100	99.77	100	100	.	.	.	.	.	.	.	.	.	.	100	97.07;100.00	.	100	87.03	100	100	100	99.95	.	.	100	100	99.46	97.77	.	.	.	.	.	.	.	.	.	100
12291_5#39.unscaffolded_contigs_velvet.fa.tab	17	.	100	100	99.72	99.86	99.86	100	.	.	.	.	.	.	.	.	100	97.07;100.00	100	100	86.71	100	100	99.79	100	.	.	100	100	.	.	.	.	.	.	.	.	.	.	.	.
14673_1#16.unscaffolded_contigs_velvet.fa.tab	18	.	100	100	99.72	99.86	99.86	100	.	.	.	.	.	.	.	.	100	97.07;100.00	100	100	87.03	100	100	99.79	100	.	.	100	100	.	82.62	.	.	.	.	.	.	.	.	.	.
14673_1#47.unscaffolded_contigs_velvet.fa.tab	11	.	.	.	100	100	.	.	.	.	.	.	.	.	.	.	100	97.07;100.00	.	100	87.03	.	100	100	100	.	.	100	100	.	.	.	.	.	.	.	.	.	.	.	.
14673_1#49.unscaffolded_contigs_velvet.fa.tab	15	.	100	.	99.79	100	.	.	.	.	.	.	.	.	.	.	100	97.07;100.00	100	100	86.71	100	100	100	100	.	.	100	100	96.67	.	.	.	.	.	.	.	.	.	.	.
14673_2#50.unscaffolded_contigs_velvet.fa.tab	24	91.55	100	100	99.79	100	.	.	.	.	.	.	.	.	.	.	100	97.07;100.00	100	100	87.03	100	100	100	100	.	.	100	100	100	.	100	100	100	.	100	100	100	.	.	100
14673_3#52.unscaffolded_contigs_velvet.fa.tab	15	.	100	100	99.79	100	.	.	.	.	.	.	.	.	.	.	100	97.07;100.00	100	99.93	86.71	100	100	99.79	100	.	.	100	100	.	.	.	.	.	.	.	.	.	.	.	.
14673_4#44.unscaffolded_contigs_velvet.fa.tab	20	.	100	99.77	100	100	.	.	.	.	.	.	.	.	.	.	100	97.07;100.00	100	100	87.03	100	100	99.79	100	.	.	100	100	.	87.56	.	.	100	.	100	100	100	.	.	.
15277_1#18.unscaffolded_contigs_velvet.fa.tab	16	.	.	100	99.79	99.86	99.86	100	.	.	.	.	.	.	.	.	100	97.07;100.00	.	99.93	86.71	100	100	100	100	.	.	100	100	95.43	.	.	.	.	.	.	.	.	.	.	.
15277_1#7.unscaffolded_contigs_velvet.fa.tab	15	.	100	100	99.79	100	.	.	.	.	.	.	.	.	.	.	100	97.07;100.00	100	99.93	86.71	100	100	99.79	100	.	.	100	100	.	.	.	.	.	.	.	.	.	.	.	.
15608_2#56.unscaffolded_contigs_velvet.fa.tab	20	.	100	99.77	100	100	.	.	.	.	.	.	.	.	.	.	100	97.07;100.00	.	100	87.03	100	100	100	100	.	.	100	100	80.89	98.53	.	.	100	.	100	100	100	.	.	.
15608_2#58.unscaffolded_contigs_velvet.fa.tab	17	.	100	99.77	100	100	.	.	.	.	.	.	.	.	.	.	100	97.07;100.00	.	100	87.03	100	100	99.42	99.95	.	.	100	100	99.46	87.8	.	.	.	.	.	.	.	.	.	100
15608_2#59.unscaffolded_contigs_velvet.fa.tab	15	.	100	.	100	100	.	.	.	.	.	.	.	.	.	.	100	97.07;100.00	100	100	87.03	100	100	99.79	100	.	.	100	100	.	96.68	.	.	.	.	.	.	.	.	.	.
15608_2#67.unscaffolded_contigs_velvet.fa.tab	15	.	100	.	99.79	99.86	99.86	100	.	.	.	.	.	.	.	.	100	97.07;100.00	.	100	87.03	100	100	100	100	.	.	100	100	.	.	.	.	.	.	.	.	.	.	.	.
15608_2#93.unscaffolded_contigs_velvet.fa.tab	14	.	100	.	99.79	.	100	99.85	.	.	.	.	.	.	.	.	100	97.07;100.00	.	100	86.71	100	100	100	100	.	.	100	100	.	.	.	.	.	.	.	.	.	.	.	.
15608_3#27.unscaffolded_contigs_velvet.fa.tab	18	.	100	100	99.72	99.86	99.86	100	.	.	.	.	.	.	.	.	100	97.07;100.00	100	100	87.03	100	100	99.79	100	.	.	100	100	.	98.67	.	.	.	.	.	.	.	.	.	.
19084_8#151.unscaffolded_contigs_velvet.fa.tab	14	.	.	.	100	100	.	.	.	.	.	.	.	.	.	.	100	97.07;100.00	100	100	87.03	100	100	99.79	100	.	.	100	100	.	98.53	.	.	.	.	.	.	.	.	.	.
19084_8#154.unscaffolded_contigs_velvet.fa.tab	17	.	100	100	99.72	99.86	99.86	100	.	.	.	.	.	.	.	.	100	97.07;100.00	100	100	87.03	100	100	99.79	100	.	.	100	100	.	.	.	.	.	.	.	.	.	.	.	.
9950_2#71.unscaffolded_contigs_velvet.fa.tab	15	.	100	100	99.72	99.86	99.86	100	.	.	.	.	.	.	.	.	100	97.07;100.00	.	100	.	100	100	99.15	100	.	.	100	100	.	.	.	.	.	.	.	.	.	.	.	.
11679_1#48.unscaffolded_contigs_velvet.fa.tab	15	.	100	.	99.79	99.86	99.86	100	.	.	.	.	.	.	.	.	100	97.07;100.00;97.18	.	100	87.03	100	100	100	100	.	.	100	100	.	.	.	.	.	.	.	.	.	.	.	.
11511_7#46.unscaffolded_contigs_velvet.fa.tab	19	.	100	99.77	100	100	.	.	.	.	.	.	.	.	.	.	100	97.18;100.00	.	100	87.03	100	100	99.79	100	.	.	100	100	.	87.56	.	.	100	.	100	100	100	.	.	.
11657_2#49.unscaffolded_contigs_velvet.fa.tab	17	.	100	100	99.79	99.86	99.86	100	.	.	.	.	.	.	.	.	100	97.18;100.00	100	99.93	86.71	100	100	100	100	.	.	100	100	.	.	.	.	.	.	.	.	.	.	.	.
11822_1#70.unscaffolded_contigs_velvet.fa.tab	15	.	.	100	99.79	99.86	99.86	99.56	.	.	.	.	.	.	.	.	100	97.18;100.00	.	99.93	86.71	100	100	100	100	.	.	100	100	.	.	.	.	.	.	.	.	.	.	.	.
11826_1#72.unscaffolded_contigs_velvet.fa.tab	15	.	100	100	99.79	100	.	.	.	.	.	.	.	.	.	.	100	97.18;100.00	100	99.93	86.71	100	100	99.79	100	.	.	100	100	.	.	.	.	.	.	.	.	.	.	.	.
11826_1#73.unscaffolded_contigs_velvet.fa.tab	20	.	100	.	99.79	100	.	.	.	.	.	.	.	.	.	.	100	97.18;100.00	.	100	87.03	100	100	100	100	.	.	100	100	.	99.29	100	100	100	.	100	100	100	.	.	.
11826_1#79.unscaffolded_contigs_velvet.fa.tab	18	.	100	99.77	100	100	.	.	.	.	.	.	.	.	.	.	100	97.18;100.00	.	100	87.03	.	100	100	100	.	.	100	100	93.6	.	.	.	100	.	100	100	100	.	.	.
11893_8#5.unscaffolded_contigs_velvet.fa.tab	16	.	100	100	99.79	100	.	.	.	.	.	.	.	.	.	.	100	97.18;100.00	100	99.93	86.71	100	100	99.79	100	.	.	100	100	.	90.46	.	.	.	.	.	.	.	.	.	.
12291_5#16.unscaffolded_contigs_velvet.fa.tab	15	.	100	100	99.79	100	.	.	.	.	.	.	.	.	.	.	100	97.18;100.00	100	99.93	86.71	100	100	99.79	100	.	.	100	100	.	.	.	.	.	.	.	.	.	.	.	.
14673_2#10.unscaffolded_contigs_velvet.fa.tab	17	.	100	100	99.79	99.86	99.86	100	.	.	.	.	.	.	.	.	100	97.18;100.00	.	99.93	86.71	100	100	100	100	.	.	100	100	95.43	.	.	.	.	.	.	.	.	.	.	.
14673_2#47.unscaffolded_contigs_velvet.fa.tab	15	.	100	100	100	100	.	.	.	.	.	.	.	.	.	.	100	97.18;100.00	100	100	86.71	100	100	100	99.95	.	.	100	100	.	.	.	.	.	.	.	.	.	.	.	.
14673_2#58.unscaffolded_contigs_velvet.fa.tab	15	.	100	100	99.79	100	.	.	.	.	.	.	.	.	.	.	100	97.18;100.00	100	99.93	86.71	100	100	99.79	100	.	.	100	100	.	.	.	.	.	.	.	.	.	.	.	.
14673_2#75.unscaffolded_contigs_velvet.fa.tab	17	.	100	100	99.72	99.86	99.86	100	.	.	.	.	.	.	.	.	100	97.18;100.00	100	100	86.71	100	100	99.79	100	.	.	100	100	.	.	.	.	.	.	.	.	.	.	.	.
15608_2#22.unscaffolded_contigs_velvet.fa.tab	16	.	.	100	99.79	99.86	99.86	100	.	.	.	.	.	.	.	.	100	97.18;100.00	.	99.93	86.71	100	100	100	100	.	.	100	100	95.43	.	.	.	.	.	.	.	.	.	.	.
15608_2#7.unscaffolded_contigs_velvet.fa.tab	17	.	100	100	99.79	99.86	99.86	100	.	.	.	.	.	.	.	.	100	97.18;100.00	.	99.93	86.71	100	100	100	100	.	.	100	100	95.43	.	.	.	.	.	.	.	.	.	.	.
15608_3#18.unscaffolded_contigs_velvet.fa.tab	15	.	100	100	99.79	100	.	.	.	.	.	.	.	.	.	.	100	97.18;100.00	100	99.93	86.71	100	100	99.79	100	.	.	100	100	.	.	.	.	.	.	.	.	.	.	.	.
15608_3#21.unscaffolded_contigs_velvet.fa.tab	18	.	100	99.77	100	100	.	.	.	.	.	.	.	.	.	.	100	97.18;100.00	.	100	87.03	.	100	100	100	.	.	100	100	99.41	.	.	.	100	.	100	100	100	.	.	.
15608_3#28.unscaffolded_contigs_velvet.fa.tab	14	.	100	99.77	100	100	.	.	.	.	.	.	.	.	.	.	100	97.18;100.00	.	99.93	87.03	.	100	100	100	.	.	100	100	99.52	.	.	.	.	.	.	.	.	.	.	.
11822_1#28.unscaffolded_contigs_velvet.fa.tab	15	.	100	.	99.79	99.86	99.86	100	.	.	.	.	.	.	.	.	100	97.18;97.18	.	100	87.03	100	100	100	100	.	.	100	100	.	.	.	.	.	.	.	.	.	.	.	.
15608_2#18.unscaffolded_contigs_velvet.fa.tab	15	.	100	.	99.79	99.86	99.86	100	.	.	.	.	.	.	.	.	100	97.18;97.70;97.07;100.00	.	100	87.03	100	100	100	100	.	.	100	100	.	.	.	.	.	.	.	.	.	.	.	.
14673_1#57.unscaffolded_contigs_velvet.fa.tab	16	.	100	99.77	100	100	.	.	.	.	.	.	.	.	.	.	100	97.60;100.00	.	100	87.03	100	100	100	99.95	.	.	100	100	.	97.77	.	.	.	.	.	.	.	.	.	100
14673_4#45.unscaffolded_contigs_velvet.fa.tab	17	.	100	.	99.79	100	.	.	.	.	.	.	.	.	.	.	100	97.60;100.00	100	100	87.03	100	100	99.84	99.95	.	.	100	100	90.07	97.82	.	.	.	.	.	.	.	.	.	100
15608_2#26.unscaffolded_contigs_velvet.fa.tab	17	.	100	100	99.72	99.86	99.86	100	.	.	.	.	.	.	.	.	100	97.60;100.00	100	100	87.03	100	100	99.79	100	.	.	100	100	.	.	.	.	.	.	.	.	.	.	.	.
19084_8#144.unscaffolded_contigs_velvet.fa.tab	18	.	100	100	99.79	99.86	99.86	99.56	.	.	.	.	.	.	.	.	100	97.60;97.07	100	100	86.71	100	100	100	100	.	.	100	100	95.43	.	.	.	.	.	.	.	.	.	.	.
11511_7#71.unscaffolded_contigs_velvet.fa.tab	15	.	100	100	99.79	100	.	.	.	.	.	.	.	.	.	.	99.47	97.70;100.00	100	99.93	87.03	.	100	100	100	.	.	100	100	88.92	.	.	.	.	.	.	.	.	.	.	.
11511_7#87.unscaffolded_contigs_velvet.fa.tab	20	.	100	.	99.79	100	.	.	.	.	.	.	.	.	.	.	100	97.70;100.00	.	100	87.03	100	100	100	100	.	.	100	100	.	84.05	100	100	100	.	100	100	100	.	.	.
11511_8#14.unscaffolded_contigs_velvet.fa.tab	18	.	.	.	99.79	100	.	.	.	.	.	.	.	.	.	.	100	97.70;100.00	.	100	87.03	100	100	100	100	.	.	100	100	.	.	100	100	100	.	100	100	100	.	.	.
11511_8#61.unscaffolded_contigs_velvet.fa.tab	19	.	100	.	99.79	100	.	.	.	.	.	.	.	.	.	.	100	97.70;100.00	.	100	87.03	100	100	100	100	.	.	100	100	.	.	100	100	100	.	100	100	100	.	.	.
11657_1#72.unscaffolded_contigs_velvet.fa.tab	19	.	100	100	99.79	100	99.86	100	.	.	.	.	.	.	.	.	100	97.70;100.00	100	99.93	86.71	100	100	100	100	.	.	100	100	95.43	87.37	.	.	.	.	.	.	.	.	.	.
11657_4#9.unscaffolded_contigs_velvet.fa.tab	20	.	100	.	99.79	100	.	.	.	.	.	.	.	.	.	.	100	97.70;100.00	.	100	87.03	100	100	100	100	.	.	100	100	.	99.29	100	100	100	.	100	100	100	.	.	.
11822_1#6.unscaffolded_contigs_velvet.fa.tab	17	.	100	100	99.79	99.86	99.86	100	.	.	.	.	.	.	.	.	100	97.70;100.00	.	99.93	86.71	100	100	100	100	.	.	100	100	95.43	.	.	.	.	.	.	.	.	.	.	.
11822_1#73.unscaffolded_contigs_velvet.fa.tab	14	.	100	.	99.79	100	.	.	.	.	.	.	.	.	.	.	100	97.70;100.00	.	100	87.03	100	100	100	100	.	.	100	100	.	99.29	.	.	.	.	.	.	.	.	.	.
11822_1#9.unscaffolded_contigs_velvet.fa.tab	23	.	100	.	99.79	99.86	99.86	100	.	.	.	.	.	.	.	.	100	97.70;100.00	.	100	87.03	100	100	100	100	.	.	100	100	95.43	98.58	100	100	100	.	100	100	100	.	.	.
11893_8#33.unscaffolded_contigs_velvet.fa.tab	21	.	100	.	99.79	100	.	.	.	.	.	.	.	.	.	.	100	97.70;100.00	.	100	87.03	100	100	100	100	.	.	100	100	.	86.89	100	100	100	.	100	100	100	.	.	100
14673_1#94.unscaffolded_contigs_velvet.fa.tab	20	.	100	.	99.79	100	.	.	.	.	.	.	.	.	.	.	100	97.70;100.00	.	100	87.03	100	100	100	100	.	.	100	100	.	81.2	100	100	100	.	100	100	100	.	.	.
14673_2#41.unscaffolded_contigs_velvet.fa.tab	23	.	100	.	99.79	99.86	99.86	100	.	.	.	.	.	.	.	.	100	97.70;100.00	.	99.93	87.03	100	100	100	100	.	.	100	100	.	86.89	100	100	100	.	100	100	100	.	.	100
15608_2#28.unscaffolded_contigs_velvet.fa.tab	22	.	100	100	99.79	99.86	99.86	100	.	.	.	.	.	.	.	.	100	97.70;100.00	100	100	87.03	100	100	100	100	.	.	100	100	.	.	100	.	100	.	100	100	100	.	.	.
17966_5#115.unscaffolded_contigs_velvet.fa.tab	15	.	100	99.77	100	100	.	.	.	.	.	.	.	.	.	.	100	97.70;100.00	100	100	86.71	100	100	100	100	.	.	100	100	.	.	.	.	.	.	.	.	.	.	.	.
19084_8#148.unscaffolded_contigs_velvet.fa.tab	20	.	100	.	99.79	100	.	.	.	.	.	.	.	.	.	.	100	97.70;100.00	.	100	87.03	100	100	100	100	.	.	100	100	.	85.47	100	100	100	.	100	100	100	.	.	.
19084_8#160.unscaffolded_contigs_velvet.fa.tab	23	.	100	.	99.79	99.86	99.86	100	.	.	.	.	.	.	.	.	100	97.70;100.00	.	99.93	87.03	100	100	100	100	.	.	100	100	.	86.89	100	100	100	.	100	100	100	.	.	100
9950_2#83.unscaffolded_contigs_velvet.fa.tab	15	.	.	.	99.79	99.86	99.86	100	.	.	.	.	.	.	.	.	100	97.70;100.00	.	100	87.03	100	100	100	100	.	.	100	100	.	85.19	.	.	.	.	.	.	.	.	.	.
9950_3#35.unscaffolded_contigs_velvet.fa.tab	20	.	.	.	99.79	100	.	.	.	.	.	.	.	.	.	.	100	97.70;100.00	.	100	87.03	100	100	100	100	.	.	100	100	.	86.89	100	100	100	.	100	100	100	.	.	100
11826_1#60.unscaffolded_contigs_velvet.fa.tab	17	.	100	99.77	100	100	.	.	.	.	.	.	.	.	.	.	.	97.70;96.97	.	99.93	87.03	.	100	100	100	.	.	100	100	.	90.98	.	.	100	.	100	100	100	.	.	.
15608_2#35.unscaffolded_contigs_velvet.fa.tab	16	.	.	100	99.79	99.86	99.86	100	.	.	.	.	.	.	.	.	100	97.70;97.18;100.00	.	99.93	86.71	100	100	100	100	.	.	100	100	95.43	.	.	.	.	.	.	.	.	.	.	.
11679_1#45.unscaffolded_contigs_velvet.fa.tab	22	.	100	.	99.79	100	99.86	100	.	.	.	.	.	.	.	.	100	97.70;97.60;100.00	.	100	87.03	100	100	100	100	.	.	100	100	.	99.29	100	100	100	.	100	100	100	.	.	.
11511_7#42.unscaffolded_contigs_velvet.fa.tab	20	.	100	.	99.79	100	.	.	.	.	.	.	.	.	.	.	100	97.70;97.70;100.00	.	100	87.03	100	100	100	100	.	.	100	100	.	99.29	100	100	100	.	100	100	100	.	.	.

## Sheet: Data 10
Assembly	# contigs (>= 0 bp)	# contigs (>= 1000 bp)	# contigs (>= 5000 bp)	# contigs (>= 10000 bp)	# contigs (>= 25000 bp)	# contigs (>= 50000 bp)	Total length (>= 0 bp)	Total length (>= 1000 bp)	Total length (>= 5000 bp)	Total length (>= 10000 bp)	Total length (>= 25000 bp)	Total length (>= 50000 bp)	# contigs	Largest contig	Total length	Reference length	GC (%)	Reference GC (%)	N50	NG50	N75	NG75	L50	LG50	L75	LG75	# misassemblies	# misassembled contigs	Misassembled contigs length	# local misassemblies	# scaffold gap ext. mis.	# scaffold gap loc. mis.	# unaligned mis. contigs	# unaligned contigs	Unaligned length	Genome fraction (%)	Duplication ratio	# N's per 100 kbp	# mismatches per 100 kbp	# indels per 100 kbp	Largest alignment	Total aligned length	NA50	NGA50	NA75	NGA75	LA50	LGA50	LA75
P55_S33	57	44	31	27	19	11	1734335	1728886	1700483	1671392	1548481	1258100	48	227000	1731795	2146611	40.59	39.98	92683	90074	46147	13841	7	9	12	23	12	3	249077	22	0	0	23	16 + 31 part	1172430	26.043	1.001	0	3935.85	30.41	48213	559444	-	-	-	-	-	-	-
B85_S7	59	40	32	29	23	13	1914732	1907444	1888979	1872001	1789357	1445706	43	196362	1910066	2146611	40.06	39.98	119572	117663	50721	35927	6	7	13	18	6	5	101713	4	0	0	23	9 + 32 part	1313455	27.757	1.001	0	4049.77	37.59	25426	596464	-	-	-	-	-	-	-
7P_S3	61	46	34	32	24	13	1889736	1883190	1857940	1838967	1717571	1299152	50	156263	1886315	2146611	40.21	39.98	95503	61708	45207	36148	8	10	16	21	11	6	246592	20	0	0	28	9 + 38 part	1260428	29.052	1.004	0	4000.42	38.16	49563	627265	-	-	-	-	-	-	-
P60_S36	63	44	29	26	20	9	1823419	1815682	1781900	1759539	1676518	1278523	50	284625	1819846	2146611	40.33	39.98	131658	123540	44985	27517	5	6	11	18	3	1	22983	10	0	0	23	18 + 31 part	1243353	26.81	1.002	0	3983.03	34.58	30108	576523	-	-	-	-	-	-	-
B111_S32	64	43	28	26	21	14	1745383	1735577	1703086	1691789	1620663	1372787	50	166882	1741491	2146611	40.64	39.98	88797	77197	72464	27118	8	10	13	21	0	0	0	4	0	0	25	18 + 29 part	1161033	26.964	1.003	0	4000.32	29.37	54595	579946	-	-	-	-	-	-	-
B151_S69	65	44	31	28	20	10	1872785	1864449	1830626	1810951	1677330	1314724	49	252604	1868345	2146611	40.25	39.98	100707	99358	47481	29198	6	7	12	18	6	2	205736	22	0	0	24	18 + 30 part	1281102	27.368	1	0	4058.49	41.19	52448	589615	-	-	-	-	-	-	-
P59_S35	67	50	33	32	23	13	1898199	1890144	1847980	1841576	1701206	1305133	56	367176	1894770	2146611	40.15	39.98	72269	60280	45085	35948	7	9	16	21	9	4	221192	19	0	0	23	17 + 35 part	1300463	27.554	1.005	0	3990.99	40.58	49055	593125	-	-	-	-	-	-	-
P28_S15	69	46	33	29	20	14	1902725	1890674	1859595	1826039	1693859	1440290	54	258528	1897655	2146611	40.06	39.98	93167	85405	51819	41062	8	9	14	18	11	4	268729	24	0	0	21	18 + 31 part	1276207	28.855	1.003	0	4093.92	37.78	47464	620969	-	-	-	-	-	-	-
B73_S91	71	47	33	31	20	14	1893264	1883500	1850307	1833480	1664983	1444972	53	203754	1888259	2146611	40.01	39.98	85256	80414	53661	30606	7	9	14	19	6	5	169291	9	0	0	21	17 + 33 part	1292573	27.653	1.004	0	4042.77	42.12	48727	595596	-	-	-	-	-	-	-
B60_S78	72	44	28	25	17	10	1740673	1729623	1690654	1674453	1554410	1314362	51	205756	1734713	2146611	40.65	39.98	132665	116036	59594	15613	6	7	10	21	3	1	59594	11	0	0	23	18 + 31 part	1133306	27.996	1.001	0	4042.11	30.28	64575	601348	-	-	-	-	-	-	-
P11_S4	72	45	29	23	17	13	1871216	1860293	1818813	1778625	1673189	1496444	49	369287	1863574	2146611	40.25	39.98	96615	90837	74248	44633	6	8	12	16	5	2	176587	18	0	0	23	18 + 29 part	1293159	26.264	1.012	0	4029	33.7	48316	570232	-	-	-	-	-	-	-
13P_S6	78	55	36	32	22	13	1805943	1798309	1754641	1725522	1560696	1222636	57	173136	1799892	2146611	40.36	39.98	63141	54102	41313	18988	8	11	16	25	4	3	40680	8	0	0	26	20 + 35 part	1201220	27.829	1.002	0	4014.51	36.33	30944	599006	-	-	-	-	-	-	-
B113_S34	82	48	34	28	21	12	1730883	1720113	1689296	1646090	1548368	1249842	50	159113	1721661	2146611	40.62	39.98	88688	75608	40328	13852	7	10	14	25	9	4	185857	20	0	0	27	14 + 35 part	1155603	26.358	1	0	3955.42	27.75	53780	566121	-	-	-	-	-	-	-
B165_S83	84	42	30	26	19	11	1918188	1904444	1875143	1848529	1741307	1416944	47	332757	1908268	2146611	40	39.98	120386	116963	48369	38883	6	7	12	16	6	2	174792	17	0	0	25	15 + 28 part	1321961	27.259	1.002	0	4049.31	37.77	47856	585761	-	-	-	-	-	-	-
12P_S5	85	45	34	30	21	11	1765142	1749447	1722749	1696812	1556221	1195815	54	197170	1756012	2146611	40.56	39.98	84759	64066	40415	16215	7	9	14	24	16	5	286057	41	0	0	25	17 + 35 part	1162917	27.577	1.002	0	3954.86	30.74	26472	592744	-	-	-	-	-	-	-
B173_S91	86	51	40	36	21	12	1962135	1951033	1923274	1895227	1667881	1347380	55	457503	1953602	2146611	39.99	39.98	67024	61280	38874	32075	6	8	15	19	16	2	191759	22	0	0	28	11 + 42 part	1330048	29.024	1.001	0	4138.34	45.58	67941	623667	-	-	-	-	-	-	-
32P_S19	87	49	32	28	19	10	1898093	1885732	1840798	1816185	1668519	1365026	53	287281	1888819	2146611	40.21	39.98	126934	83289	40326	27553	5	7	12	17	1	1	15704	3	0	0	25	19 + 32 part	1278221	28.389	1.002	0	3959.44	35.28	30153	610285	-	-	-	-	-	-	-
B57_S75	87	55	37	31	24	12	1832227	1821493	1784599	1735781	1610705	1164312	58	209133	1823745	2146611	40.38	39.98	69590	61106	40184	28992	8	11	17	24	17	4	299757	30	0	0	28	14 + 40 part	1215822	28.206	1.004	0	3981.52	35.84	60643	604538	-	-	-	-	-	-	-
B129_S48	89	35	28	24	16	10	1902565	1884571	1869197	1839565	1731645	1478776	42	399312	1890242	2146611	40.07	39.98	113112	111303	61187	44506	4	5	9	13	5	3	110041	10	0	0	23	13 + 27 part	1261100	29.231	1.003	0	3980.68	44.62	30084	628992	-	-	-	-	-	-	-
52P_S30	90	41	28	26	18	15	2007129	1991408	1958223	1944346	1829281	1704559	47	266566	1995529	2146611	39.8	39.98	122757	106159	57673	56182	6	7	12	14	4	2	65806	12	0	0	21	12 + 29 part	1403401	27.229	1.013	0	4040.16	40.55	38048	589601	-	-	-	-	-	-	-
B162_S80	90	50	34	29	21	13	1918532	1902635	1867812	1833237	1710520	1381180	58	212797	1909162	2146611	40.13	39.98	86765	69950	46742	39232	7	9	15	19	11	3	258927	18	0	0	25	18 + 35 part	1298039	28.316	1.005	0	4109.88	48.86	54958	612755	-	-	-	-	-	-	-
B172_S90	90	46	32	30	22	12	1880459	1867693	1828875	1814874	1707326	1316037	49	191207	1869687	2146611	40.08	39.98	98211	76583	47511	37371	7	9	14	19	7	3	142117	10	0	0	27	11 + 35 part	1283616	27.274	1.001	0	3965.17	38.6	46566	586186	-	-	-	-	-	-	-
B128_S47	92	53	38	35	24	11	1904816	1889796	1853599	1830279	1659457	1217774	62	218525	1896529	2146611	40.24	39.98	94075	73413	36714	27789	7	9	16	23	6	1	125658	21	0	0	30	22 + 38 part	1380474	24.032	1	0	3984.1	39.54	21849	516081	-	-	-	-	-	-	-
B100_S21	93	59	39	33	23	13	1936221	1922326	1866316	1817345	1653658	1266287	68	207464	1929257	2146611	40.15	39.98	76337	61086	43654	31928	8	10	18	22	3	2	58899	3	0	0	30	20 + 43 part	1325595	28.003	1.004	0	3988.43	47.25	47826	602107	-	-	-	-	-	-	-
B134_S53	94	62	43	36	25	12	1957804	1946688	1903019	1861984	1690211	1200335	67	170599	1950427	2146611	39.96	39.98	74689	57958	41353	29099	9	10	18	23	7	3	170894	9	0	0	31	18 + 43 part	1356177	27.401	1.01	0	4106.18	54.74	38049	591085	-	-	-	-	-	-	-
B153_S71	94	45	33	26	20	14	1811282	1792677	1762029	1713957	1627629	1386791	56	164153	1801054	2146611	40.38	39.98	93249	82957	51673	25914	8	9	14	20	0	0	0	2	0	0	23	23 + 29 part	1234291	26.293	1.004	0	3923.34	34.55	30182	565682	-	-	-	-	-	-	-
B93_S14	94	56	38	35	25	14	1943152	1930038	1890095	1871105	1729708	1347935	60	169424	1932547	2146611	39.97	39.98	77704	76141	43573	30479	9	10	17	21	22	6	426671	38	0	0	29	15 + 40 part	1273394	30.429	1.009	0	3994.24	47.46	25426	657584	-	-	-	-	-	-	-
B30_S48	95	57	37	31	20	13	1934361	1918628	1874586	1832510	1662175	1402099	67	169421	1926764	2146611	40.34	39.98	97096	79550	48626	32796	7	8	14	19	14	5	271143	36	0	0	24	26 + 36 part	1306105	28.785	1.004	0	4072.35	33.5	49491	619243	-	-	-	-	-	-	-
B33_S51	96	49	34	32	21	11	1905261	1890837	1859147	1844963	1659766	1274897	54	237886	1894519	2146611	40.22	39.98	97493	83250	43395	29135	7	8	15	20	3	1	48008	5	0	0	30	18 + 33 part	1352564	25.235	1	0	3938.43	25.66	15719	541963	-	-	-	-	-	-	-
B133_2_S52	97	57	38	34	27	13	1924000	1909652	1866392	1833197	1706116	1196948	65	140662	1915772	2146611	39.97	39.98	72486	66586	40553	28181	10	11	19	24	8	2	234744	25	0	0	31	26 + 37 part	1348601	26.433	1	0	3956.03	37.36	29368	567842	-	-	-	-	-	-	-
B122_S43	98	46	25	24	16	9	1838095	1819052	1769628	1763224	1646921	1350126	55	325377	1826210	2146611	40.33	39.98	158310	102857	47362	40279	5	6	10	15	9	3	222749	27	0	0	22	21 + 31 part	1222046	28.098	1.002	0	3989.4	30.01	62444	603446	-	-	-	-	-	-	-
62P_S38	99	59	43	38	22	11	1956869	1942262	1902767	1862472	1590749	1193252	66	220541	1947264	2146611	39.87	39.98	76981	65542	34781	22427	8	9	18	23	3	2	48674	1	0	0	32	19 + 42 part	1351256	27.743	1.001	0	3918.03	38.96	30123	596187	-	-	-	-	-	-	-
27P_S14	100	56	40	37	30	12	1918797	1899152	1868824	1847711	1750120	1052748	70	183930	1910128	2146611	40.17	39.98	56240	49196	38939	34751	11	13	21	26	1	1	39276	6	0	0	33	29 + 39 part	1392986	24.08	1	0	3931.6	27.66	40745	517197	-	-	-	-	-	-	-
B110_S31	100	55	39	35	22	11	1797230	1782843	1748079	1718501	1513471	1118637	60	217995	1786709	2146611	40.45	39.98	75069	51825	37091	17753	8	11	17	27	18	5	417359	35	0	0	28	19 + 38 part	1192862	27.587	1.003	0	4045.88	39.18	66225	593908	-	-	-	-	-	-	-
B161_S79	100	59	39	36	25	15	2012605	1997899	1955987	1936758	1773889	1416868	67	175405	2003617	2146611	39.89	39.98	77841	66310	42149	36110	8	9	17	20	16	7	220927	18	0	0	24	25 + 39 part	1388937	28.588	1.002	0	4019.63	39.11	25425	614509	-	-	-	-	-	-	-
B56_S74	100	54	31	27	21	11	1844082	1826385	1783110	1758959	1658076	1287225	64	246042	1834162	2146611	40.33	39.98	87424	73194	44697	27340	6	8	13	20	22	5	475830	59	0	0	24	26 + 33 part	1161483	31.196	1.005	0	3984.03	37.03	56662	671275	-	-	-	-	-	-	-
B176_S94	101	32	24	22	17	11	1903312	1884764	1866235	1852583	1759236	1548754	34	377275	1886066	2146611	40.21	39.98	167494	138169	61043	40046	4	5	9	13	2	1	42630	3	0	0	20	9 + 24 part	1315140	26.54	1.002	0	4041.83	39.67	38024	570964	-	-	-	-	-	-	-
B114_S35	102	42	29	25	18	11	1840290	1821913	1794553	1762657	1643211	1365884	47	254460	1825984	2146611	40.15	39.98	123650	106588	45274	34114	6	7	12	18	3	2	71759	8	0	0	22	18 + 26 part	1246541	26.913	1.003	0	4018.74	44.31	30116	579024	-	-	-	-	-	-	-
B125_S45	102	59	39	31	21	13	1789083	1772283	1727234	1673338	1521637	1231212	70	167457	1780442	2146611	40.52	39.98	78121	74146	40986	15646	9	11	16	26	6	3	110861	7	0	0	26	30 + 38 part	1213079	26.377	1.002	0	3992.17	33.56	54526	567391	-	-	-	-	-	-	-
1P_S1	104	64	44	41	28	8	1774468	1760782	1724491	1702516	1500031	786592	69	174227	1764763	2146611	40.51	39.98	47945	37045	30622	15698	10	15	22	34	13	4	191590	34	0	0	28	20 + 46 part	1260112	23.475	1.001	0	4062.32	27.19	41824	504193	-	-	-	-	-	-	-
B168_S86	104	63	45	34	26	11	1914502	1899427	1858442	1773779	1641874	1126300	69	168374	1904189	2146611	40.07	39.98	70562	65810	32193	26066	9	10	19	25	5	3	108490	8	0	0	32	24 + 43 part	1399250	23.518	1	0	4015.09	33.28	25039	507409	-	-	-	-	-	-	-
P42_S25	105	77	51	44	28	14	1960330	1949657	1887646	1832858	1602887	1091835	82	196260	1953836	2146611	39.99	39.98	59190	52207	31548	21135	12	14	24	29	3	2	61166	15	0	0	37	26 + 55 part	1465370	22.615	1.006	0	4046.73	32.13	38303	488618	-	-	-	-	-	-	-
B155_S73	108	64	38	32	22	13	1903300	1888019	1839840	1792728	1619154	1270745	71	192034	1893489	2146611	40.2	39.98	64333	57117	41013	30174	8	10	17	22	0	0	0	6	0	0	30	30 + 39 part	1383525	23.725	1.001	0	4072.67	33.77	41417	509990	-	-	-	-	-	-	-
B63_S81	108	73	53	46	26	9	1889325	1875046	1820781	1766680	1413955	794670	82	136833	1881640	2146611	40.18	39.98	40014	38248	26832	19629	13	16	26	35	1	1	38248	4	0	0	42	20 + 57 part	1353059	24.53	1.004	0	4027.25	35.89	19742	527294	-	-	-	-	-	-	-
P21_S10	108	84	58	47	27	8	1760760	1752334	1690054	1615282	1300607	581863	88	89876	1755171	2146611	40.51	39.98	41608	36027	23336	10562	15	20	28	47	9	3	178368	15	0	0	39	27 + 58 part	1313281	20.539	1.002	0	4016.69	43.1	31380	441031	-	-	-	-	-	-	-
B148_S66	109	67	38	32	24	16	1902901	1885642	1819863	1776417	1663098	1377748	78	191318	1893909	2146611	40.21	39.98	74261	68758	43555	30991	9	11	17	23	6	3	168217	15	0	0	29	36 + 37 part	1352811	25.135	1.003	0	4067.87	35.96	40122	539988	-	-	-	-	-	-	-
B174_S92	109	68	51	42	29	12	1850575	1836270	1802309	1743374	1539021	945222	75	92997	1841607	2146611	40.24	39.98	69901	44203	29611	17589	12	15	24	33	10	3	177368	13	0	0	34	30 + 42 part	1353418	22.674	1.003	0	3998.02	48.28	30139	484509	-	-	-	-	-	-	-
B31_S49	109	58	33	28	16	11	1953650	1934930	1883065	1841699	1653239	1457518	70	310473	1943572	2146611	40.13	39.98	78678	73442	49777	33961	5	6	12	15	14	4	220134	30	0	0	20	33 + 33 part	1351957	27.496	1.002	0	4050.22	41.68	30116	591656	-	-	-	-	-	-	-
B42_S60	110	60	35	33	22	12	1914201	1897274	1835530	1823918	1643130	1247971	68	176141	1903037	2146611	40.13	39.98	94524	67826	39907	34310	8	10	17	21	17	4	345362	36	0	0	25	23 + 38 part	1321699	26.934	1.005	0	4018.61	44.45	50166	579350	-	-	-	-	-	-	-
B126_S46	111	55	39	34	23	14	1868597	1848498	1808962	1777136	1608353	1267165	64	217640	1855855	2146611	40.3	39.98	67029	58960	43778	22479	9	11	17	24	12	4	249058	31	0	0	29	21 + 41 part	1251465	28.12	1.001	0	3890.51	30.65	47102	604145	-	-	-	-	-	-	-
B106_S27	112	57	37	32	21	13	1820048	1799295	1755362	1724334	1535075	1264696	69	180095	1807813	2146611	40.37	39.98	70225	64750	39480	23756	8	10	16	25	8	4	171618	16	0	0	29	22 + 43 part	1278345	24.547	1.005	0	3968.09	33.78	15938	527505	-	-	-	-	-	-	-
B146_S64	112	69	40	34	23	15	1991789	1972784	1907976	1867923	1707684	1384623	81	166406	1982640	2146611	39.99	39.98	67918	65173	44517	36817	9	10	18	21	3	1	54808	4	0	0	32	29 + 46 part	1382373	27.745	1.008	0	3999.01	39.96	11814	598998	-	-	-	-	-	-	-
B15_S37	113	50	33	28	24	16	1937718	1918561	1873155	1838346	1771435	1431544	55	133872	1921921	2146611	39.91	39.98	77049	71674	49411	46072	10	11	17	20	12	5	308105	33	0	0	22	19 + 33 part	1300914	28.908	1.001	0	3875.27	38.51	52728	621060	-	-	-	-	-	-	-
B137_S55	114	64	41	39	30	11	1805536	1786963	1735848	1724563	1592015	932575	75	161457	1795430	2146611	40.42	39.98	54374	44931	32911	19308	11	14	22	31	13	4	178068	31	0	0	32	33 + 41 part	1268072	24.544	1.001	0	3877.05	33.97	41982	527910	-	-	-	-	-	-	-
B107_S28	115	66	55	47	30	14	1919383	1901841	1876315	1817330	1533228	977332	76	99456	1908953	2146611	39.81	39.98	50659	44886	26251	21271	14	17	27	34	9	3	87918	11	0	0	36	24 + 49 part	1423149	22.34	1.013	0	3820.72	32.11	17467	485499	-	-	-	-	-	-	-
B50_S68	115	47	39	35	25	13	1927617	1906498	1887169	1854523	1701333	1259521	52	139142	1910542	2146611	40.12	39.98	76123	73610	41012	31702	9	10	17	22	4	3	78571	10	0	0	29	12 + 38 part	1353607	25.946	1	0	3997.25	39.86	21393	556973	-	-	-	-	-	-	-
B5_S27	116	66	40	36	21	12	1721193	1702337	1648576	1621109	1390440	1064452	77	164975	1709675	2146611	40.69	39.98	64659	44401	34029	10288	9	13	18	35	16	6	262256	44	0	0	25	35 + 39 part	1172896	24.961	1.002	0	4038.81	28.18	53262	535847	-	-	-	-	-	-	-
B65_S83	116	75	52	42	26	7	1936285	1917359	1860800	1790730	1516030	811639	87	315432	1927263	2146611	40.05	39.98	43431	41558	28418	19978	11	13	24	31	12	6	219940	21	0	0	33	33 + 52 part	1344299	27.148	1	0	4037.36	42.04	23898	583054	-	-	-	-	-	-	-
14P_S7	117	76	46	39	22	11	1904656	1885786	1818728	1768940	1496378	1062784	91	196028	1897210	2146611	40.31	39.98	61357	46120	33332	18666	9	12	20	28	4	3	117333	20	0	0	32	45 + 44 part	1405502	22.854	1.002	0	3970.81	29.76	30195	491725	-	-	-	-	-	-	-
B67_S85	118	68	43	38	27	13	1838715	1817133	1762082	1726427	1528179	1019697	83	121789	1828328	2146611	40.38	39.98	57223	45367	29429	19244	12	15	22	31	9	2	154509	25	0	0	32	34 + 45 part	1323896	23.38	1.005	0	4037.06	36.46	40771	503106	-	-	-	-	-	-	-
3P_S2	119	71	54	42	23	11	1898519	1878697	1844473	1763354	1444175	984628	85	158134	1888975	2146611	40.22	39.98	52321	44859	28415	18629	11	13	23	31	6	3	90197	9	0	0	33	31 + 50 part	1395685	22.877	1.004	0	3986.91	43.78	26789	492748	-	-	-	-	-	-	-
B167_S85	120	66	45	36	24	11	1866727	1848615	1798608	1736011	1517290	1103969	74	180835	1854647	2146611	40.38	39.98	71604	51494	29821	22256	9	11	20	28	7	4	126270	13	0	0	31	29 + 44 part	1343182	23.827	1	0	3978.38	33.82	39012	513849	-	-	-	-	-	-	-
B44_S62	120	51	34	29	22	14	1903069	1882546	1837861	1802195	1712284	1422153	56	156113	1886601	2146611	40.12	39.98	90984	73934	53787	36956	7	9	14	19	5	2	149644	12	0	0	27	19 + 34 part	1327913	25.969	1.002	0	3989.01	40.9	40808	557737	-	-	-	-	-	-	-
22P_S11	121	59	34	29	19	12	1973408	1949582	1895356	1856220	1711228	1446614	72	382336	1959478	2146611	40.05	39.98	99269	95871	46624	35306	6	7	13	16	9	3	217511	20	0	0	27	28 + 37 part	1377682	26.95	1.006	0	3953.27	35.44	58477	581988	-	-	-	-	-	-	-
B117_S38	122	62	46	34	25	10	1906697	1881690	1854005	1765110	1621062	1076870	77	185945	1894687	2146611	40.22	39.98	72430	60790	36589	26358	9	10	19	25	5	3	128501	14	0	0	31	29 + 42 part	1311887	27.026	1.005	0	4047.31	27.92	38671	581406	-	-	-	-	-	-	-
B21_S42	122	57	28	25	19	11	1965928	1946789	1876003	1855943	1787570	1457391	60	262577	1949153	2146611	40.02	39.98	154970	80018	49557	45455	5	6	12	15	11	2	140309	15	0	0	21	29 + 29 part	1370480	26.615	1.013	0	4072.3	36.41	14661	579208	-	-	-	-	-	-	-
44P_S26	124	67	43	35	23	14	1853904	1832807	1781986	1728277	1535854	1221420	79	155426	1842013	2146611	40.46	39.98	72002	55693	34260	18703	9	12	18	27	8	5	213287	19	0	0	29	38 + 38 part	1315162	24.489	1.002	0	4090.26	38.24	42512	526924	-	-	-	-	-	-	-
B121_S42	124	65	42	35	22	16	1984119	1966838	1917059	1871741	1659219	1432348	68	164525	1969050	2146611	39.96	39.98	69733	66864	45437	29032	9	10	17	21	10	4	178547	13	0	0	28	25 + 42 part	1394444	26.704	1.002	0	4130.12	31.75	26892	574636	-	-	-	-	-	-	-
B99_S20	124	64	37	32	19	11	1898912	1878183	1813556	1783408	1544378	1236731	71	211945	1883130	2146611	40.23	39.98	91843	79946	37833	22538	7	9	16	22	3	2	93489	9	0	0	30	30 + 39 part	1336980	25.413	1.001	0	4079.29	28.6	39112	548524	-	-	-	-	-	-	-
B13_S35	126	49	33	27	20	12	1828099	1801631	1764609	1723263	1605945	1344595	61	223945	1811344	2146611	40.43	39.98	109817	78619	47899	21770	6	8	13	21	8	2	122898	23	0	0	23	25 + 32 part	1222957	27.362	1.002	0	3965.02	35.41	58248	587812	-	-	-	-	-	-	-
B78_S96	126	73	51	42	27	11	1928486	1906636	1858670	1800082	1564075	1015985	85	268371	1915932	2146611	40.21	39.98	52810	42394	29439	24205	10	13	23	29	4	2	49443	3	0	0	37	34 + 48 part	1502701	19.177	1.004	0	3826.45	26.24	15841	412240	-	-	-	-	-	-	-
B112_S33	128	55	37	34	20	9	1818347	1791635	1747669	1726962	1474399	1072381	69	182973	1802239	2146611	40.48	39.98	81628	49781	35468	19781	7	10	16	27	3	2	39288	14	0	0	26	25 + 38 part	1277528	24.336	1.004	0	4091.25	31.01	39194	522739	-	-	-	-	-	-	-
B139_S57	128	68	45	40	25	11	1948399	1926182	1870654	1835607	1602717	1072227	79	242797	1935263	2146611	39.91	39.98	53713	47422	34794	23320	10	12	20	26	2	2	41049	4	0	0	36	28 + 47 part	1393216	25.175	1.003	0	4060.2	33.68	23896	543426	-	-	-	-	-	-	-
B22_S43	129	77	52	44	27	9	1706296	1686081	1628092	1571785	1346309	736935	88	165708	1695354	2146611	40.76	39.98	43477	32803	26871	6017	12	18	25	49	0	0	0	1	0	0	40	35 + 50 part	1248454	20.783	1.002	0	4088.63	41.02	30139	448448	-	-	-	-	-	-	-
B96_S17	130	83	47	42	26	10	1796724	1777432	1701496	1665266	1419702	813464	95	122818	1786692	2146611	40.62	39.98	49142	43106	27959	12205	12	16	23	38	3	3	52261	5	0	0	31	45 + 45 part	1251361	24.891	1.002	0	4009.08	35.19	56717	534402	-	-	-	-	-	-	-
38P_S23	131	80	49	42	23	13	1884950	1863025	1788104	1737699	1415869	1057932	95	126669	1874738	2146611	40.16	39.98	60417	46878	27785	18237	11	14	23	32	10	7	163115	10	0	0	37	36 + 54 part	1318385	25.765	1.006	0	3904.71	35.62	47846	555355	-	-	-	-	-	-	-
B170_S88	132	61	42	35	23	13	1898193	1876379	1835883	1777367	1554139	1142622	68	146639	1881111	2146611	40.13	39.98	60273	56363	42716	23885	10	12	19	26	11	2	194673	26	0	0	32	26 + 41 part	1420337	21.132	1.016	0	4015.85	37.7	24324	460786	-	-	-	-	-	-	-
B3_S25	132	72	45	38	26	13	1761344	1740490	1677231	1623595	1434049	997837	80	139071	1747181	2146611	40.47	39.98	60269	41325	27604	11237	11	15	22	37	6	3	120791	16	0	0	30	29 + 47 part	1179689	26.372	1.002	0	3999.96	37.98	33175	566388	-	-	-	-	-	-	-
B46_S64	134	53	33	29	21	14	1899965	1871080	1821596	1791756	1664153	1385244	70	238548	1883347	2146611	40.16	39.98	75470	72595	48959	35798	8	9	15	20	6	2	125877	22	0	0	24	32 + 34 part	1294789	27.386	1.001	0	3964.5	35.72	48368	590684	-	-	-	-	-	-	-
B91_S12	134	92	64	55	21	10	2006496	1988456	1933864	1868137	1324330	904157	104	141359	1997640	2146611	39.94	39.98	42766	40847	19731	16465	13	14	29	35	14	7	279067	29	0	0	41	35 + 62 part	1335507	30.627	1.007	0	3847.96	42.29	27693	659560	-	-	-	-	-	-	-
B76_S94	135	86	54	49	24	9	1805839	1786396	1690650	1656548	1235954	687318	95	124394	1793966	2146611	40.38	39.98	40636	34773	22217	11673	14	19	29	45	6	3	131320	30	0	0	35	27 + 57 part	1281545	23.681	1.008	0	3875.34	38.56	22932	509034	-	-	-	-	-	-	-
B140_S58	136	68	47	41	24	11	1864469	1840976	1796102	1756037	1456474	944267	77	160124	1848545	2146611	40.27	39.98	58951	45482	36127	20819	11	14	22	31	12	5	152948	11	0	0	34	28 + 46 part	1316271	24.729	1.003	0	3969.45	30.9	18865	532348	-	-	-	-	-	-	-
B163_S81	136	86	59	48	29	14	1987396	1970344	1912897	1839245	1515802	1017634	92	108484	1974539	2146611	39.94	39.98	50650	40222	26388	20389	14	16	28	34	9	3	131384	11	0	0	41	37 + 54 part	1443576	24.691	1.002	0	4045.33	33.02	26798	530973	-	-	-	-	-	-	-
B37_S55	136	60	45	39	23	13	1876657	1847633	1810404	1769130	1511911	1191949	77	226929	1860739	2146611	40.28	39.98	64749	52693	32581	18924	9	11	19	28	3	3	139351	7	0	0	30	27 + 46 part	1337783	24.27	1.004	0	4032.51	37.43	39681	521537	-	-	-	-	-	-	-
B9_S31	136	89	53	44	22	11	1940149	1920768	1843924	1783612	1448052	1046412	102	250550	1930442	2146611	40.18	39.98	61875	46090	25401	14784	10	12	22	31	7	5	96403	15	0	0	30	52 + 47 part	1399591	24.583	1.006	0	4029.55	33.73	24915	530606	-	-	-	-	-	-	-
61P_S37	137	76	41	37	23	14	1895624	1871025	1785242	1755072	1511163	1193464	90	160518	1882577	2146611	40.33	39.98	68803	59901	32897	19827	10	12	20	28	2	2	80187	14	0	0	36	46 + 43 part	1377620	23.466	1.002	0	4000.29	32.36	24065	504985	-	-	-	-	-	-	-
B116_S37	137	62	43	33	22	12	1858931	1827782	1788432	1722890	1541941	1201683	86	204417	1844933	2146611	40.26	39.98	69241	66323	30720	18511	8	10	17	26	7	5	95817	15	0	0	26	38 + 45 part	1259900	27.16	1.003	0	4029.07	31.73	51560	583888	-	-	-	-	-	-	-
B14_S36	137	52	31	27	22	13	1897921	1868771	1814885	1784074	1726306	1389221	63	319948	1877682	2146611	40.1	39.98	102581	62761	41274	37803	6	8	14	19	5	2	34630	6	0	0	25	23 + 37 part	1312573	26.163	1.006	0	3992.41	39.17	34383	563223	-	-	-	-	-	-	-
B47_S65	137	67	44	38	27	12	1880142	1855304	1810829	1767996	1606094	1037062	79	177433	1864606	2146611	40.17	39.98	58281	46409	37312	21971	11	13	21	28	36	18	828689	76	0	0	16	33 + 43 part	797417	49.627	1.002	0	3685.26	52.29	79881	1068018	3117	-	-	-	76	-	-
B59_S77	138	87	46	40	26	9	1934406	1909153	1810805	1766492	1514978	852601	107	158876	1925050	2146611	40.24	39.98	46428	45946	29802	23145	12	14	24	30	8	3	158696	19	0	0	36	57 + 48 part	1412745	23.837	1.001	0	4007.78	38.7	24065	511900	-	-	-	-	-	-	-
50P_S29	141	79	56	48	27	9	1817765	1797945	1740783	1676501	1325774	691910	86	120020	1802792	2146611	40.59	39.98	38200	34383	23070	14529	14	19	29	43	7	2	67890	8	0	0	35	27 + 56 part	1349760	21.079	1.001	0	3993.21	36.24	30180	452893	-	-	-	-	-	-	-
B97_S18	144	84	54	43	26	12	1918956	1895076	1828578	1752743	1447632	930323	97	111018	1905132	2146611	40	39.98	49732	42034	29531	19371	13	16	26	34	11	3	124607	13	0	0	37	45 + 49 part	1386888	24.051	1.004	0	3962.7	42.03	29125	517398	-	-	-	-	-	-	-
B158_S76	145	96	61	49	22	12	1869343	1851274	1774336	1692775	1236521	913161	105	119951	1857722	2146611	40.11	39.98	41052	32958	21149	13591	13	17	29	42	4	2	38916	7	0	0	42	36 + 67 part	1408831	20.778	1.006	0	3952.09	39.01	11451	448092	-	-	-	-	-	-	-
B12_S34	148	69	43	36	24	14	1812230	1788407	1722591	1678851	1500205	1136740	74	175892	1792837	2146611	40.61	39.98	60808	51994	38560	13439	10	13	19	31	9	3	180442	16	0	0	32	28 + 45 part	1206716	27.31	1	0	3921.65	37.02	46887	586200	-	-	-	-	-	-	-
B169_S87	149	93	55	44	26	11	1979658	1960635	1875283	1803709	1524903	995587	102	224591	1967393	2146611	40.01	39.98	53839	43584	27046	22058	11	13	25	30	5	3	57704	6	0	0	35	45 + 54 part	1478476	22.688	1.004	0	3987.35	34.09	19371	492994	-	-	-	-	-	-	-
P164_S40	149	105	62	48	27	6	1999196	1979079	1881976	1779119	1429398	680379	117	157420	1989008	2146611	40.04	39.98	36915	36339	21472	17872	14	16	30	36	1	1	43685	17	0	0	42	47 + 65 part	1478229	23.743	1.002	0	4033.84	34.53	24087	510888	-	-	-	-	-	-	-
B77_S95	150	91	55	44	27	16	1997417	1971216	1894461	1826273	1546399	1200568	111	139452	1985562	2146611	40.16	39.98	56336	52697	27479	22301	13	14	25	30	0	0	0	12	0	0	35	59 + 49 part	1433649	25.589	1.005	0	4096.82	32.04	39394	550903	-	-	-	-	-	-	-
B102_S23	151	79	54	42	28	15	2026418	2000144	1948172	1867246	1647214	1170033	92	131274	2010021	2146611	39.89	39.98	56946	55368	34930	25579	13	14	24	27	16	7	310737	28	0	0	36	39 + 49 part	1452642	25.874	1.004	0	3890.54	39.79	22270	556685	-	-	-	-	-	-	-
B49_S67	151	71	47	40	30	10	1972918	1945168	1892222	1846698	1710277	950183	84	136496	1954828	2146611	39.98	39.98	46054	45700	35866	32863	11	13	23	27	58	20	1189839	100	0	0	18	31 + 44 part	887039	49.505	1.005	0	3728.78	56.08	73994	1062760	2301	-	-	-	95	-	-
B124_S44	152	79	46	38	24	14	1981114	1955699	1882811	1825189	1600107	1211961	92	208656	1965075	2146611	40.18	39.98	63263	52462	37971	22473	10	12	21	25	0	0	0	3	0	0	39	39 + 48 part	1403591	26.041	1.004	0	3971.41	28.26	12839	560206	-	-	-	-	-	-	-
B88_S10	152	79	50	41	22	15	1962131	1929300	1850733	1789580	1484331	1265409	102	190002	1947387	2146611	40.07	39.98	62993	59015	26298	18851	10	12	22	29	12	5	222062	28	0	0	33	45 + 54 part	1386326	26.044	1.004	0	4073.31	36.49	48760	560066	-	-	-	-	-	-	-
B10_S32	154	67	42	37	22	12	1812468	1788464	1735347	1698675	1464722	1119273	70	193031	1790760	2146611	40.63	39.98	61144	51844	34380	13569	9	12	18	30	0	0	0	0	0	0	35	24 + 44 part	1348156	20.59	1.001	0	3942.61	30.09	30179	444994	-	-	-	-	-	-	-
B26_S45	154	78	46	38	24	11	1819645	1793460	1721223	1662619	1453012	1004903	89	129920	1801963	2146611	40.28	39.98	57436	42141	29191	12128	10	13	21	34	1	1	30802	6	0	0	34	37 + 49 part	1370310	20.078	1.002	0	3957.55	33.87	30133	431719	-	-	-	-	-	-	-
B45_S63	158	70	44	37	24	10	1763116	1735673	1676585	1626310	1408560	922481	78	144529	1741950	2146611	40.46	39.98	68431	37872	29962	11548	9	14	21	36	8	5	168969	14	0	0	34	28 + 47 part	1213854	24.57	1.001	0	3932.69	31.47	38287	530027	-	-	-	-	-	-	-
B147_S65	159	68	47	41	23	10	1833078	1797576	1751499	1709671	1413053	939078	87	176376	1812055	2146611	40.4	39.98	52684	41356	28563	14126	10	14	21	34	0	0	0	3	0	0	33	37 + 45 part	1359843	21.025	1.002	0	3931.54	30.58	25253	453570	-	-	-	-	-	-	-
B166_S84	159	83	53	42	27	13	1959379	1933383	1864629	1786316	1544560	1057718	92	140448	1939614	2146611	40.14	39.98	57836	46361	26380	21453	12	14	24	30	4	3	120791	15	0	0	41	33 + 55 part	1375674	26.232	1.001	0	4084.01	30.19	46845	563482	-	-	-	-	-	-	-
B55_S73	161	76	54	44	24	12	1830824	1802927	1757283	1683231	1360327	930675	85	121437	1810322	2146611	40.42	39.98	57316	39542	25757	12502	12	16	24	38	7	1	57316	4	0	0	37	28 + 51 part	1292135	23.918	1.009	0	3905.88	42.65	15035	516796	-	-	-	-	-	-	-
B34_S52	165	90	52	44	24	13	1955667	1926787	1848066	1792543	1446387	1041930	106	146272	1939156	2146611	40.19	39.98	53137	49911	24574	19159	12	14	25	32	5	3	146311	17	0	0	34	51 + 52 part	1452783	22.559	1.004	0	4019.24	38.62	22972	485025	-	-	-	-	-	-	-
B43_S61	167	82	45	41	26	12	1897722	1867427	1786550	1755743	1535926	984196	97	167735	1878242	2146611	40.25	39.98	50257	49203	37435	17541	12	14	22	30	7	5	73504	11	0	0	34	36 + 53 part	1335207	25.04	1.01	0	4054.53	33.3	38314	543117	-	-	-	-	-	-	-
B82_S4	168	97	58	47	25	12	1980210	1949496	1859910	1782604	1413183	912360	116	164952	1965166	2146611	40.01	39.98	44643	43457	22683	17091	14	16	28	35	7	2	123641	14	0	0	38	59 + 54 part	1476719	22.684	1.003	0	3934.76	33.88	36736	489692	-	-	-	-	-	-	-
B132_S51	170	63	33	29	24	15	1888352	1855284	1778147	1751428	1672691	1363286	72	239208	1862177	2146611	40.44	39.98	70586	67791	48299	27079	8	10	16	22	0	0	0	7	0	0	28	38 + 33 part	1362157	23.282	1.001	0	4003.69	28.61	38199	500085	-	-	-	-	-	-	-
B69_S87	172	105	69	51	31	9	2003867	1973567	1898974	1788024	1482225	745442	125	119045	1989526	2146611	39.94	39.98	38638	33983	23261	16943	15	18	32	38	1	1	8981	6	0	0	44	59 + 61 part	1508688	22.252	1.007	0	4029.47	32.24	12877	479188	-	-	-	-	-	-	-
B119_S40	174	103	72	57	26	8	2039828	2010421	1942924	1837830	1291374	639340	123	124872	2025365	2146611	39.93	39.98	37583	37025	20424	19467	17	19	37	41	11	7	188960	16	0	0	43	53 + 66 part	1499686	24.449	1.002	0	4021.55	48.78	21950	525144	-	-	-	-	-	-	-
B54_S72	175	39	33	30	26	12	1942348	1906533	1890650	1865505	1803366	1235036	43	335757	1909330	2146611	39.92	39.98	70963	61283	46233	38425	8	10	17	21	3	1	35433	6	0	0	28	8 + 32 part	1303168	28.204	1.001	0	3978.76	44.43	21971	605751	-	-	-	-	-	-	-
B95_S16	175	112	65	55	27	9	1876808	1850658	1754476	1685410	1234046	657716	127	112162	1862164	2146611	40.28	39.98	32265	27670	18948	11553	17	22	35	49	5	3	136719	12	0	0	39	64 + 60 part	1344304	24.08	1.002	0	4042.68	35.4	34489	519034	-	-	-	-	-	-	-
B61_S79	176	81	55	48	26	10	1864005	1828720	1766368	1720621	1365030	796944	99	167267	1842288	2146611	40.23	39.98	44058	37119	23449	14369	13	17	27	39	6	4	162839	24	0	0	31	34 + 62 part	1292454	25.546	1.003	0	4055.94	37.57	40090	549544	-	-	-	-	-	-	-
B74_S92	176	103	69	58	26	7	1821532	1790117	1718798	1635152	1127265	437149	124	91663	1805936	2146611	40.37	39.98	34731	29594	17454	11152	19	24	37	56	9	6	164504	28	0	0	42	53 + 66 part	1297129	23.558	1.006	0	4036.47	41.92	29769	508109	-	-	-	-	-	-	-
B20_S41	189	105	52	43	28	9	1894332	1857944	1760267	1703468	1476989	762635	131	143133	1878323	2146611	40.23	39.98	47321	43074	27717	14316	13	16	26	35	7	4	99791	13	0	0	35	73 + 53 part	1386309	22.918	1	0	4009.81	38.21	25532	492633	-	-	-	-	-	-	-
B157_S75	190	97	70	54	25	8	1789049	1757106	1693652	1569059	1101078	529541	110	89835	1766687	2146611	40.34	39.98	33444	25832	17726	9092	18	24	36	59	7	6	168216	18	0	0	41	29 + 75 part	1282509	22.477	1.004	0	4006.13	44.98	44478	483808	-	-	-	-	-	-	-
B105_S26	197	94	57	47	27	14	2004720	1963025	1884900	1816937	1504954	1032267	120	113917	1982239	2146611	39.97	39.98	50222	49624	26687	18376	14	15	27	32	7	3	123838	17	0	0	32	66 + 50 part	1447889	24.774	1.005	0	4082.32	38.36	23905	533215	-	-	-	-	-	-	-
B156_S74	203	84	48	42	24	11	1891520	1851807	1751827	1711736	1455610	980024	102	130341	1864597	2146611	40.28	39.98	51119	45858	28080	12517	11	13	22	33	5	2	131907	11	0	0	37	46 + 52 part	1370753	22.973	1.001	0	3995.87	42.58	30166	495932	-	-	-	-	-	-	-
B4_S26	207	92	55	42	26	12	1884908	1842099	1758680	1664851	1434203	904358	113	157743	1859198	2146611	40.29	39.98	48423	44519	27797	12997	13	16	25	38	4	1	31495	10	0	0	39	43 + 63 part	1270873	27.3	1.004	0	4001.93	33.1	38344	588757	-	-	-	-	-	-	-
B38_S56	209	25	22	19	13	11	2099235	2047866	2038617	2020206	1912344	1820924	30	453659	2051974	2146611	39.56	39.98	182781	173739	112790	112790	4	5	8	8	5	2	113440	12	0	0	15	9 + 18 part	1512349	25.08	1.002	0	4003.8	29.53	27244	538819	-	-	-	-	-	-	-
B19_S40	211	131	73	59	24	8	2005638	1967483	1845870	1749040	1176710	604279	158	139598	1988878	2146611	39.96	39.98	33221	29573	18184	13403	18	21	40	47	10	5	177917	18	0	0	49	70 + 78 part	1443755	25.214	1.007	0	3947.88	36.95	21850	542824	-	-	-	-	-	-	-
B79_S1	216	132	79	56	26	7	2033303	1997674	1870841	1697831	1217203	528834	152	108180	2013822	2146611	40.02	39.98	33899	33289	15049	13556	20	22	42	49	10	8	140376	13	0	0	51	63 + 83 part	1525021	22.697	1.003	0	3939.6	39.41	19080	489427	-	-	-	-	-	-	-
B89L_S11	237	52	35	29	22	16	1969880	1916798	1874750	1830291	1744978	1548488	59	190248	1921674	2146611	40.06	39.98	112478	71085	55968	36047	7	8	14	18	2	2	67274	4	0	0	25	23 + 34 part	1321479	27.949	1	0	4056.17	33.34	50896	600266	-	-	-	-	-	-	-
B1_S23	252	100	63	53	26	7	1982065	1932223	1869787	1795928	1343040	641668	116	228927	1945345	2146611	40.13	39.98	38363	35843	22438	17051	15	18	31	39	7	6	101630	19	0	0	37	43 + 69 part	1422540	24.277	1.003	0	3861.82	32.43	30838	522011	-	-	-	-	-	-	-
B52_S70	282	146	77	57	25	3	1863138	1814617	1653932	1512833	1006426	210868	170	79652	1832416	2146611	40.46	39.98	28534	23049	13952	6306	22	28	45	70	5	5	46896	5	0	0	55	77 + 85 part	1378484	20.952	1.009	0	3892.28	42.24	30297	451670	-	-	-	-	-	-	-
B159_S77	295	151	94	66	27	3	1985790	1933059	1789154	1591275	1001540	169928	178	58681	1952695	2146611	39.94	39.98	26190	20109	12518	9265	27	31	55	68	5	5	86576	9	0	0	47	68 + 94 part	1657450	13.444	1.023	0	3865.93	45.39	16775	289439	-	-	-	-	-	-	-
[truncated: 1 more columns]
